# Supplementary material for: Metabolic Analyses Revealed Time-Dependent Synergistic Killing by Colistin and Aztreonam Combination Against Multidrug-Resistant Acinetobacter baumannii
Source: Front Microbiol. 2018 Nov 16;9:2776. doi: 10.3389/fmicb.2018.02776 (PMC6250834; doi:10.3389/fmicb.2018.02776)
Supplement: Supplementary file 2 [file Data_Sheet_2.xlsx]

## Sheet: Dataset S1
Dataset S1. Metabolomics dataset collected from the HILIC method.
PeakID	Mass	RT	Formula	Putative metabolite	confidence	Map	Pathway	Max intensity	Control				Colistin (1 mg/L)			Aztreonam (128 mg/L)			Colistin/Aztreonam			PBQC	Control_0h					Control_1h					Control_4h					Control_24h					Colistin_1h					Colistin_4h
									C_0h	C_1h	C_4h	C_24h	COL_1h	COL_4h	COL_24h	AZT_1h	AZT_4h	AZT_24h	CA_1h	CA_4h	CA_24h	QC	C_0h_1	C_0h_2	C_0h_3	C_0h_4	C_0h_5	C_1h_1	C_1h_2	C_1h_3	C_1h_4	C_1h_5	C_4h_1	C_4h_2	C_4h_3	C_4h_4	C_4h_5	C_24h_1	C_24h_2	C_24h_3	C_24h_4	C_24h_5	COL_1h_1	COL_1h_2	COL_1h_3	COL_1h_4	COL_1h_5	COL_4h_1	COL_4h_2
n1417	203.116	7.55139	C9H17NO4	O-Acetylcarnitine	6	Amino Acid Metabolism	Alanine and aspartate metabolism	325256	0.613913	1	1.45711	1.07279	1.2102	1.41727	1.01184	0.331255	0.794231	0.391163	0.602026	0.569902	0.394181	1.17881	53297.2	79767.8	101057	164556	76296.3	116301	152582	136501	182810	185491	39719.7	271195	227770	325256	263400	223532	65006.2	134810	170858	235796	172285	258870	134739	188064	182356	219606	191869
n2351	175.048	14.3276	C6H9NO5	N-Acetyl-L-aspartate	10	Amino Acid Metabolism	Alanine and aspartate metabolism	920128	0.971134	1	3.93704	9.17993	0.782881	3.00515	7.80034	0.412513	0.734138	0.404607	0.563338	0.413531	1.70084	2.22551	42673.4	52725.4	51762.5	168162	87357.9	79474.2	55493.5	29406.7	183664	66612.2	194331	272387	218388	573423	373965	797721	856091	920128	606688	625830	64218.8	72845.4	33624.4	83038.3	70894.9	211998	263753
n852	133.038	14.7316	C4H7NO4	L-Aspartate	10	Amino Acid Metabolism	Alanine and aspartate metabolism__Arginine and proline metabolism__Glycine, serine and threonine metabolism__Lysine biosynthesis__Arginine and proline metabolism__Histidine metabolism__beta-Alanine metabolism__Cyanoamino acid metabolism__Carbon fixation	16292758	1.87851	1	1.20758	2.66238	1.77235	1.42201	2.42947	1.24472	1.4513	1.48394	1.53883	1.42816	2.02317	1.95499	7.90648e+06	6.88547e+06	1.36109e+07	5.37042e+06	6.973e+06	3.76604e+06	5.04398e+06	4.79301e+06	3.37762e+06	4.71009e+06	5.65285e+06	5.3116e+06	5.8229e+06	4.65959e+06	4.74642e+06	1.10771e+07	1.07833e+07	1.5506e+07	9.79038e+06	1.05923e+07	4.87268e+06	1.62928e+07	5.73265e+06	5.39048e+06	6.15495e+06	5.24183e+06	6.9238e+06
p1586	89.0477	14.699	C3H7NO2	L-Alanine	10	Amino Acid Metabolism	Alanine and aspartate metabolism__Cysteine metabolism__Taurine and hypotaurine metabolism__Selenoamino acid metabolism__D-Alanine metabolism__Carbon fixation__Reductive carboxylate cycle (CO2 fixation)	14472908	0.965839	1	1.51051	1.43441	1.24146	1.50861	1.53136	1.15694	1.41469	1.75143	1.22695	1.1713	1.18985	1.43649	4.83092e+06	6.09475e+06	7.12582e+06	5.22762e+06	5.42624e+06	5.0916e+06	5.556e+06	7.06426e+06	6.25351e+06	5.75526e+06	5.44563e+06	1.02225e+07	9.00955e+06	1.00164e+07	1.01992e+07	9.85028e+06	9.23331e+06	7.23499e+06	8.59232e+06	7.72057e+06	6.01221e+06	1.28201e+07	5.61945e+06	6.41151e+06	6.03357e+06	7.52985e+06	8.57786e+06
p3787	132.054	15.1264	C4H8N2O3	L-Asparagine	10	Amino Acid Metabolism	Alanine and aspartate metabolism__Tetracycline biosynthesis__Cyanoamino acid metabolism__Nitrogen metabolism	183692	1.30674	1	1.20292	0.887059	1.11293	1.19385	0.872351	1.16171	1.16459	1.1533	1.25995	1.20868	1.00253	1.15755	113631	121247	176539	110635	95705.9	80678.4	91836.4	108078	98472.4	93684.1	107402	117005	117639	114698	111938	99157.1	80940.7	104266	75055.2	59937.7	86430.2	151127	106754	86342.2	95483	103735	138623
n2135	304.138	13.0085	C11H20N4O6	D-Nopaline	6	Amino Acid Metabolism	Arginine and proline metabolism	228652	0.901029	1	1.00169	1.2451	1.25905	1.08299	1.24092	1.04809	0.827269	0.716362	0.84263	0.792178	0.733401	1.01777	71484.3	68330.3	49603	67509.3	81895.6	62929.1	82536.4	86684	72476.8	71413.2	76268.6	69564.4	63439.2	96637	70766.8	100477	54920.6	96212.8	95379.6	121216	53723.7	228652	48433.2	69994.4	72649.3	100547	83939.6
n2186	232.106	12.7501	C9H16N2O5	gamma-Glutamyl-gamma-aminobutyrate	6	Amino Acid Metabolism	Arginine and proline metabolism	261507	1.1052	1	1.18387	1.80419	1.53112	1.18276	1.63111	0.973051	0.984273	1.31375	0.999561	0.989667	0.909132	1.1887	86208.4	73122.8	123457	68955.6	70507.1	77027.3	81107.5	79548.5	74755.5	69620.5	104543	102079	72840	89872.9	82974.8	140525	133607	171555	113110	130510	75300.2	261507	64500.2	88990.4	94679.2	94498	85582.7
p1029	189.064	13.7808	C7H11NO5	N-Acetyl-L-glutamate	10	Amino Acid Metabolism	Arginine and proline metabolism	32411425	0.312122	1	5.87	44.4962	0.739972	4.92151	37.5762	0.21364	0.804288	0.685786	0.247356	0.468839	11.5391	10.3897	115538	127445	231078	265387	145100	264576	404431	220445	1.55565e+06	388883	2.21651e+06	3.27006e+06	3.10323e+06	5.03753e+06	3.00814e+06	3.02451e+07	3.24114e+07	2.19559e+07	2.31464e+07	1.83426e+07	149620	780128	145731	608235	413351	1.87848e+06	3.10396e+06
p1442	175.096	15.836	C6H13N3O3	L-Citrulline	10	Amino Acid Metabolism	Arginine and proline metabolism	18639600	1.61928	1	3.7044	31.1183	0.850917	2.50608	26.7271	0.448999	0.852328	1.19652	2.1047	0.732864	11.2213	6.72344	495540	471240	505339	1.09522e+06	767871	445595	281475	412183	539021	381415	908104	1.20009e+06	1.38222e+06	2.16452e+06	1.97497e+06	1.25002e+07	8.35604e+06	1.86396e+07	1.13949e+07	1.32033e+07	357555	294164	292630	349450	458825	1.00778e+06	1.15336e+06
p161	232.106	15.4142	C9H16N2O5	N2-Succinyl-L-ornithine	6	Amino Acid Metabolism	Arginine and proline metabolism	27263322	0.521593	1	2.00831	2.1949	0.813305	1.77955	2.15141	0.497177	1.46394	0.306034	0.578477	0.989017	0.630081	1.5105	3.23377e+06	5.05324e+06	5.14365e+06	6.5955e+06	4.82893e+06	8.87969e+06	8.37858e+06	6.22805e+06	1.5028e+07	9.13796e+06	2.39415e+07	1.53034e+07	1.5244e+07	1.91472e+07	2.20644e+07	2.05638e+07	2.3397e+07	1.6847e+07	2.19066e+07	2.18774e+07	8.09509e+06	5.84863e+06	7.07569e+06	8.5796e+06	9.15684e+06	1.49736e+07	1.54748e+07
p212	246.133	17.1108	C9H18N4O4	N2-(D-1-Carboxyethyl)-L-arginine	6	Amino Acid Metabolism	Arginine and proline metabolism	739956	0.718072	1	1.3104	1.11562	1.16719	1.35241	1.15277	0.624468	1.16893	1.06458	0.739089	1.11721	1.03933	1.0817	194390	244657	381202	334873	288565	338707	335123	377028	510100	449547	575252	532592	453830	529401	543487	450695	410475	377067	495583	509147	454505	521744	379997	475919	514471	508682	533482
p2278	129.043	14.0698	C5H7NO3	4-Oxoproline	8	Amino Acid Metabolism	Arginine and proline metabolism	4224020	0.907371	1	2.3875	16.451	0.929031	1.98043	14.1147	0.632261	1.18519	0.904547	0.817101	0.931269	4.31581	4.04407	138046	106453	320827	195616	150645	197711	113726	199143	246324	247742	410335	480623	423985	690225	393430	4.05968e+06	4.22402e+06	2.88486e+06	2.88601e+06	2.47284e+06	99385.9	226201	232569	169745	205445	294037	392669
p2460	247.069	16.9636	C9H13NO7	N-Succinyl-L-glutamate	8	Amino Acid Metabolism	Arginine and proline metabolism	3339065	0.430616	1	2.94385	19.4195	0.828857	2.24845	17.5459	0.275241	1.18747	0.405316	0.570304	0.67248	1.94631	5.87226	38743	16808.6	37585.4	63120.1	27319.7	62505.9	60625.6	54066.3	154826	94288.1	187658	257375	271528	288172	250262	946588	3.33907e+06	1.54267e+06	1.18792e+06	1.26253e+06	79329.1	66447	64633.9	79869.7	63071.8	149193	200594
p2654	173.069	9.56663	C7H11NO4	N-Acetyl-L-glutamate 5-semialdehyde	6	Amino Acid Metabolism	Arginine and proline metabolism	212025	0.796831	1	1.69077	1.29227	0.974326	1.94539	1.14181	0.55611	1.20041	0.682848	0.684753	0.880127	0.737814	0.910266	70647.3	93384.8	70557	97746.9	71073.6	99758.8	96871.7	82924.8	131007	95705.1	174028	164310	146454	192815	178374	205367	93791.6	97861.7	130020	127194	109884	86680.4	87629	96510.3	112566	191886	200946
p2818	217.143	16.3471	C9H19N3O3	gamma-L-Glutamylputrescine	8	Amino Acid Metabolism	Arginine and proline metabolism	1478446	1.44868	1	0.659182	1.21944	1.19371	0.686511	1.24075	1.1324	0.714511	1.06126	1.29483	0.613015	0.935138	1.037	727488	663925	1.47845e+06	503555	549403	526539	676725	550711	450123	503764	326031	381758	376643	316125	384417	697552	349846	565324	785010	904348	432796	1.32613e+06	507406	509066	457003	359771	358527
p3239	145.085	15.0925	C5H11N3O2	4-Guanidinobutanoate	10	Amino Acid Metabolism	Arginine and proline metabolism	628486	0.998117	1	1.88025	2.70725	1.21525	1.88573	2.63423	0.942422	1.50784	1.56822	1.04203	1.30518	1.37068	1.69611	171859	142189	191880	195655	146783	147571	137390	142409	201814	220783	284385	307987	298069	350248	357460	439573	628486	420309	420228	392480	175099	256753	197488	179719	223866	310242	338631
p3518	240.122	11.9533	C10H16N4O3	Homocarnosine	6	Amino Acid Metabolism	Arginine and proline metabolism	148493	0.703234	1	1.18786	0.927496	1.08359	1.02414	0.908879	0.635101	0.840991	0.945294	0.692568	0.718594	0.852593	0.798586	47021.8	63764.4	116666	76612.6	69803.9	99061.6	85620.5	85424.8	138172	123363	120923	127058	112291	148493	122753	108417	80296.5	87167.7	92082.2	125132	92374.1	130204	88854.7	127001	137650	115132	95982.9
p3724	259.117	11.9766	C10H17N3O5	Linatine	8	Amino Acid Metabolism	Arginine and proline metabolism	229210	0.859458	1	1.15694	0.957347	1.11278	1.14262	0.956167	0.841479	0.905423	0.966091	0.820115	0.746615	0.768237	0.877735	107347	98865.4	145114	109728	94915.2	148257	120380	127639	144413	106195	145624	145599	141054	143558	172573	139042	113207	131254	97646.4	138141	132595	191279	118355	139453	138155	140010	153897
p3756	113.059	9.79965	C4H7N3O	Creatinine	10	Amino Acid Metabolism	Arginine and proline metabolism	190531	2.12512	1	1.71402	3.55737	1.92658	1.86921	3.08552	1.85887	1.71943	3.56628	1.73028	2.17937	2.6052	2.59377	66992.2	37012.4	109241	77576.9	65809.8	27319.2	39320.8	22752.1	34986.5	43439	55816.8	60365.3	56690.5	63907.7	50862.7	115441	95872.5	164934	107330	113413	40406.8	144576	40212.6	54108.1	44010.5	54049.8	68084.2
p377	274.128	15.2318	C10H18N4O5	N2-Succinyl-L-arginine	8	Amino Acid Metabolism	Arginine and proline metabolism	98904758	0.435325	1	14.8449	17.1714	1.20456	13.3267	17.2051	0.474502	5.63043	0.329556	0.527755	3.2003	1.36558	7.6694	1.82109e+06	1.07283e+06	1.49315e+06	2.0746e+06	1.39009e+06	2.39708e+06	2.69764e+06	2.86782e+06	6.1483e+06	3.92571e+06	2.1944e+07	6.93053e+07	5.55842e+07	6.43711e+07	5.65468e+07	6.25648e+07	9.64128e+07	2.37366e+07	5.50879e+07	7.191e+07	2.62823e+06	4.95294e+06	2.67265e+06	5.53621e+06	5.93598e+06	3.95153e+07	5.52961e+07
p611	216.111	11.5315	C9H16N2O4	gamma-Glutamyl-gamma-aminobutyraldehyde	6	Amino Acid Metabolism	Arginine and proline metabolism	3209212	0.765461	1	0.818961	0.624038	1.10017	0.866115	0.677866	0.575079	0.583542	0.858076	0.694511	0.510348	0.544053	0.65311	1.77281e+06	1.7196e+06	1.96618e+06	2.07982e+06	1.79934e+06	2.72223e+06	1.9721e+06	2.16391e+06	3.1036e+06	2.237e+06	2.16055e+06	1.69737e+06	1.82075e+06	2.25848e+06	2.05324e+06	1.60069e+06	1.24153e+06	1.1993e+06	1.75983e+06	1.81119e+06	2.80626e+06	3.20921e+06	2.43606e+06	2.42582e+06	2.54352e+06	2.21098e+06	1.83218e+06
p758	131.058	8.84694	C5H9NO3	L-Glutamate 5-semialdehyde	6	Amino Acid Metabolism	Arginine and proline metabolism	237783	1.07438	1	1.20369	1.19718	1.13246	1.31324	1.32637	0.917461	1.15743	1.40932	1.25738	1.16061	1.13244	1.03287	102330	99284.3	135150	95391	131126	140048	98210.9	96009.8	101094	88922.3	148449	118005	111960	125464	127199	130737	121642	104157	136656	134473	118182	191844	85060.1	111473	87172.8	169581	124898
p980	174.1	13.5116	C7H14N2O3	N-Acetylornithine	6	Amino Acid Metabolism	Arginine and proline metabolism	14624217	0.824759	1	5.94822	16.8606	0.999488	4.65093	13.6819	0.576559	1.64572	0.839083	0.691567	0.982953	1.34444	3.86496	369014	363597	526432	595628	433931	541460	418912	472528	698623	643349	2.43246e+06	3.16573e+06	2.45805e+06	4.68456e+06	3.76474e+06	7.54495e+06	1.46242e+07	9.65364e+06	7.59969e+06	7.3636e+06	457639	734223	457066	526107	598416	2.10814e+06	2.89102e+06
p1287	174.112	23.5678	C6H14N4O2	L-Arginine	10	Amino Acid Metabolism	Arginine and proline metabolism__Clavulanic acid biosynthesis__D-Arginine and D-ornithine metabolism	28550611	1.0201	1	1.08378	0.673397	1.05564	1.08347	0.62955	0.911598	0.916658	0.854054	0.957727	0.826356	0.522462	0.828097	2.11059e+07	2.15393e+07	2.85506e+07	2.12897e+07	2.03195e+07	2.09956e+07	2.10479e+07	2.67774e+07	2.18593e+07	1.99024e+07	2.19014e+07	2.32026e+07	2.34621e+07	2.61024e+07	2.51793e+07	1.48524e+07	1.49349e+07	1.35005e+07	1.58576e+07	1.53206e+07	2.22967e+07	2.33083e+07	2.37075e+07	2.53455e+07	2.20776e+07	2.39374e+07	2.22658e+07
p2630	132.09	21.8652	C5H12N2O2	L-Ornithine	10	Amino Acid Metabolism	Arginine and proline metabolism__D-Arginine and D-ornithine metabolism__Glutathione metabolism	2976210	1.76963	1	1.08157	0.862836	1.00764	1.00103	0.78807	0.78805	0.832512	0.535406	1.12739	0.743325	0.543793	0.905233	2.04104e+06	2.69948e+06	2.97621e+06	2.78143e+06	2.36938e+06	1.86704e+06	1.41869e+06	1.40487e+06	1.30401e+06	1.27671e+06	1.60713e+06	1.7644e+06	1.77237e+06	1.46278e+06	1.25775e+06	1.25364e+06	1.30412e+06	1.48804e+06	1.02983e+06	1.19833e+06	1.66608e+06	1.35494e+06	1.7749e+06	1.29715e+06	1.2338e+06	1.49925e+06	1.68234e+06
p261	147.053	14.4604	C5H9NO4	L-Glutamate	10	Amino Acid Metabolism	Arginine and proline metabolism__Glutamate metabolism__Histidine metabolism__D-Glutamine and D-glutamate metabolism__Glutathione metabolism_Butanoate metabolism_C5-Branched dibasic acid metabolism_Porphyrin and chlorophyll metabolism_Nitrogen metabolism	114356179	1.15279	1	1.76763	3.89707	1.01641	1.68012	3.59977	0.79384	1.32136	0.97993	0.862345	1.1242	1.78644	1.96031	2.39726e+07	2.1097e+07	4.91012e+07	2.45157e+07	2.44763e+07	2.46423e+07	2.01153e+07	2.09309e+07	3.26826e+07	2.58171e+07	5.44862e+07	3.61077e+07	3.66113e+07	4.74003e+07	4.49134e+07	9.06309e+07	1.10466e+08	1.14356e+08	8.68201e+07	8.16966e+07	1.91913e+07	4.21745e+07	1.88772e+07	2.31702e+07	2.28131e+07	4.3035e+07	3.85639e+07
p1564	398.137	16.3319	C15H22N6O5S	S-Adenosyl-L-methionine	10	Amino Acid Metabolism	Arginine and proline metabolism__Methionine metabolism__Zeatin biosynthesis	15901526	0.610455	1	2.04136	1.19106	0.88728	1.76792	1.24039	0.466664	1.22104	0.31916	0.700733	0.699792	1.17619	1.21329	3.22568e+06	2.91933e+06	4.7834e+06	5.3101e+06	3.97424e+06	6.38395e+06	7.07091e+06	5.70042e+06	8.47773e+06	5.47792e+06	1.22382e+07	1.59015e+07	1.32488e+07	1.33034e+07	1.28995e+07	6.4071e+06	1.37578e+07	6.14377e+06	6.81423e+06	6.31411e+06	4.71065e+06	4.29111e+06	5.25042e+06	8.57499e+06	6.55151e+06	1.04963e+07	1.15233e+07
p2149	297.09	7.59992	C11H15N5O3S	5'-Methylthioadenosine	10	Amino Acid Metabolism	Arginine and proline metabolism__Methionine metabolism__Zeatin biosynthesis	6304447	0.538405	1	1.85355	1.81172	0.704688	1.33466	1.57116	0.362441	1.45537	0.4929	0.626305	0.893228	1.78377	0.884724	708071	756363	769050	2.0077e+06	1.63691e+06	1.4459e+06	1.37711e+06	2.08616e+06	3.09574e+06	2.91271e+06	3.6466e+06	3.31961e+06	5.14263e+06	4.67008e+06	3.45747e+06	2.59201e+06	5.83831e+06	3.91227e+06	3.34939e+06	4.08765e+06	1.66765e+06	770280	912367	1.92827e+06	2.41494e+06	2.24375e+06	3.16788e+06
p145	115.063	12.7803	C5H9NO2	L-Proline	10	Amino Acid Metabolism	Arginine and proline metabolism__Novobiocin biosynthesis	250467970	0.924164	1	2.03581	1.89464	1.55702	2.23436	1.97119	0.946602	1.62271	1.78564	1.26288	1.3142	1.82125	1.69313	7.64782e+07	7.15703e+07	1.32885e+08	6.59098e+07	8.78516e+07	7.43426e+07	8.56835e+07	9.75771e+07	1.11277e+08	1.01486e+08	1.54139e+08	1.98671e+08	1.80273e+08	2.18775e+08	2.05716e+08	1.94655e+08	1.59215e+08	1.75314e+08	1.75565e+08	1.86423e+08	1.22677e+08	2.17527e+08	1.25754e+08	1.2008e+08	1.46331e+08	1.83584e+08	2.03107e+08
p2497	217.106	12.2794	C8H15N3O4	N-Acetyl-L-citrulline	6	Amino Acid Metabolism	arginine biosynthesis III	518266	1.42229	1	0.842683	1.38777	1.12704	0.896593	1.24167	1.26878	0.788288	1.36543	0.994462	0.884921	1.02877	1.07173	269693	190394	435309	187825	169033	167052	207964	210243	138912	156280	136650	140563	152422	164315	147992	218944	220920	309466	199120	273412	145605	442584	136376	124958	142785	135088	169621
p2816	245.149	16.2694	C9H19N5O3	beta-Alanyl-L-arginine	8	Amino Acid Metabolism	beta-Alanine metabolism	1453195	1.79851	1	0.822506	3.57442	1.21636	0.807943	2.89429	1.58381	0.895207	1.22288	1.29391	0.913541	1.09064	1.30247	410271	303599	678850	250206	291247	210042	258112	222830	169313	215134	169629	198648	193691	184614	137966	1.07066e+06	419628	1.26608e+06	784919	302754	204700	548781	182479	186926	185226	170781	188630
p2566	219.111	8.68832	C9H17NO5	Pantothenate	8	Amino Acid Metabolism	beta-Alanine metabolism__Pantothenate and CoA biosynthesis	1313319	1.83187	1	0.517937	1.49995	1.13928	0.540121	1.66725	0.284742	0.393113	0.327577	0.74201	0.351392	0.325631	0.910158	445989	396556	435412	560988	219663	240444	171095	85602.9	408042	218592	70724.6	126263	130175	135768	119114	448923	366672	294921	341666	233424	277452	142595	179734	354865	325648	93064.9	128891
p2717	199.096	9.34109	C8H13N3O3	gamma-Glutamyl-beta-aminopropiononitrile	6	Amino Acid Metabolism	Cyanoamino acid metabolism	281009	0.923254	1	1.39164	1.35557	1.08176	1.37466	1.41029	0.844994	1.10969	1.35177	0.901185	0.956903	1.24013	1.16165	108416	124460	170558	128844	113312	130397	119373	127383	164165	157938	240872	155716	170842	211863	193820	207854	162405	199170	195215	183247	134374	214048	113659	142788	151555	221041	168646
p2972	199.096	12.0975	C8H13N3O3	gamma-Glutamyl-beta-aminopropiononitrile	6	Amino Acid Metabolism	Cyanoamino acid metabolism	500496	1.2112	1	1.81037	1.5976	1.40815	1.80015	1.58557	0.901827	1.44404	1.56692	1.01999	1.16953	1.49041	1.32658	200324	243270	306262	246662	230035	175872	191327	184655	234670	226150	400936	352652	348101	378167	353459	335776	255967	311419	361955	352729	208968	410046	207543	307243	292195	335055	363905
p3248	128.059	13.5751	C5H8N2O2	gamma-Amino-gamma-cyanobutanoate	8	Amino Acid Metabolism	Cyanoamino acid metabolism	664031	1.12001	1	0.886015	11.273	1.00768	1.00954	10.1375	1.24485	0.997693	1.29486	1.17001	1.24458	1.30849	2.7533	40859.2	35242	44256.2	52861.4	38731.1	33585.8	36677.8	53877.5	26753.2	38344.6	31007.7	36525.9	37292.7	26035.2	36806.9	338070	664031	503820	324359	303009	44601.2	20661.2	42482.7	52525.6	30421.9	48730.6	30764.6
p2812	426.087	16.7582	C13H22N4O8S2	S-glutathionyl-L-cysteine	8	Amino Acid Metabolism	Cysteine metabolism	1664164	0.656602	1	5.81929	11.7449	0.902683	2.61576	5.03109	0.119094	4.3793	0.73355	0.525004	1.97251	10.1743	4.35342	0	0	18717	95180.1	62335.3	42005.6	19335.7	45053.7	90937.5	71068.1	295392	101867	509857	427780	227003	791067	315775	1.00511e+06	302293	738081	44635.5	62483.6	36480.4	58457.6	40223.5	93363.4	118374
p3172	240.024	16.0202	C6H12N2O4S2	L-Cystine	10	Amino Acid Metabolism	Cysteine metabolism	992099	0.97071	1	0.581221	0.33966	0.727993	0.471813	0.155803	0.441729	2.90005	0.743517	0.997921	1.58041	0.862637	1.07379	71470.4	71377.8	106649	333312	358575	101528	77824.1	200951	170664	418822	138980	34362.8	208447	103843	78028.8	110128	0	48894.6	65811	104565	152664	92724.8	119298	126662	214652	68914.2	91546.1
n2139	147.053	10.6528	C5H9NO4	O-Acetyl-L-serine	8	Amino Acid Metabolism	Cysteine metabolism__Selenoamino acid metabolism__Zeatin biosynthesis__Sulfur metabolism	1474495	0.560857	1	2.1191	6.84935	0.816224	1.69845	6.89215	0.540169	0.748625	0.999659	0.514209	0.519401	1.58839	2.1073	64285.6	79416.7	75064.3	112210	80415.8	93172.1	120758	94308.2	263835	161433	202467	334697	217684	407072	392451	1.4745e+06	1.11713e+06	559286	1.17194e+06	701185	78861.7	183279	74494.8	139505	122564	216474	269022
p1523	160.085	11.0197	C6H12N2O3	D-Alanyl-D-alanine	8	Amino Acid Metabolism	D-Alanine metabolism__Peptidoglycan biosynthesis	14981173	0.491064	1	1.66686	1.49586	0.892808	1.61169	1.50719	0.373765	1.05171	0.214988	0.437528	0.551651	0.697889	0.961322	2.48016e+06	2.58808e+06	2.33972e+06	5.3305e+06	3.72747e+06	5.6333e+06	4.9936e+06	5.34652e+06	1.03762e+07	7.18153e+06	1.08972e+07	1.0478e+07	1.00752e+07	1.27347e+07	1.17065e+07	1.08874e+07	1.49812e+07	6.8099e+06	8.14845e+06	9.33092e+06	5.11753e+06	4.00292e+06	5.11687e+06	7.16093e+06	8.53859e+06	1.0072e+07	1.01524e+07
n2449	132.09	15.6919	C5H12N2O2	(2R,4S)-2,4-Diaminopentanoate	8	Amino Acid Metabolism	D-Arginine and D-ornithine metabolism	685859	0.505288	1	0.891241	4.85405	0.965112	2.47278	4.46622	0.509278	1.87034	0.354743	0.713848	1.15117	1.68664	1.35924	32971.4	59540.5	42789.8	82063.4	65464.6	89817	94620.7	72065	186205	117032	83881	98316.6	88065.3	122077	106523	556572	541148	685859	496683	436741	93496.1	85837	86821.9	140400	133657	249934	244664
p361	173.08	14.1609	C6H11N3O3	5-Guanidino-2-oxopentanoate	6	Amino Acid Metabolism	D-Arginine and D-ornithine metabolism	663668	0.791306	1	1.68222	1.60669	1.11994	1.59294	1.66819	0.645995	1.23809	1.17322	0.809278	1.06873	1.04862	1.17063	179431	173008	364594	255083	255415	270106	213202	306074	402747	359142	452341	475192	491272	663668	527106	511314	432849	490657	516621	540966	277430	414654	317724	356480	371036	435283	423208
n2180	146.069	12.7055	C5H10N2O3	D-Glutamine	6	Amino Acid Metabolism	D-Glutamine and D-glutamate metabolism	380963	1.18421	1	0.908815	1.02359	1.13932	0.903049	1.05415	1.18874	0.778311	1.37895	1.23347	0.866526	0.975619	1.00067	236177	203662	288979	184922	202994	173182	222595	186161	182189	178895	164034	160854	171764	187781	172601	187452	139223	205015	208593	224986	179975	380963	172405	144987	196076	162728	173287
p3476	679.102	15.3059	C20H31N3O19P2	UDP-N-acetylmuramate	8	Amino Acid Metabolism	D-Glutamine and D-glutamate metabolism__Aminosugars metabolism__Peptidoglycan biosynthesis	553078	1.07347	1	0.987797	0.324947	0.954296	0.879064	0.379176	0.232561	0.864986	0.180121	0.541281	0.548427	0.388743	0.737506	272783	358993	323637	553078	332351	423587	235171	268700	477859	309541	286500	340987	274822	403437	388187	89179.1	167734	120299	66558.7	113468	418236	171931	322396	354491	369427	270845	285856
n2907	879.183	16.9462	C28H43N5O23P2	UDP-N-acetylmuramoyl-L-alanyl-D-glutamate	8	Amino Acid Metabolism	D-Glutamine and D-glutamate metabolism__Peptidoglycan biosynthesis	224845	2.4901	1	2.58165	21.701	0	2.73638	19.3122	0.285049	7.2846	4.8941	0	5.58994	4.17772	8.77852	12642.6	7227.9	6000.14	18893.9	12467.8	0	0	0	8732.93	14251	13416.4	6512.31	0	12731	26676.8	131375	0	159090	106052	102258	0	0	0	0	0	21042.3	13689.7
n1281	148.037	14.796	C5H8O5	(R)-2-Hydroxyglutarate	6	Amino Acid Metabolism	glutamate degradation V (via hydroxyglutarate)	606795	0.969766	1	1.59204	1.84972	0.971959	1.34384	1.76111	0.759959	0.850326	0.964223	0.813722	0.695042	1.76745	1.18026	208602	185919	226191	235099	225880	256987	178043	166910	244132	269343	408069	335302	322500	355370	354545	475004	368062	348788	471765	399588	215537	235507	183417	231536	218141	248662	323202
n2593	301.056	14.543	C8H16NO9P	N-Acetyl-D-glucosamine 6-phosphate	8	Amino Acid Metabolism	Glutamate metabolism__Aminosugars metabolism	634643	0.801398	1	0.432447	0.664791	0.780217	0.381803	0.55009	0.601439	0.280411	0.329554	0.674705	0.263188	0.591968	0.563939	186491	233104	294097	498059	550371	402921	414039	251322	634643	495887	85561.6	186183	169398	246225	263501	297226	283296	385476	260573	235180	315251	342805	278877	385450	393167	128923	220051
p2860	221.09	11.8079	C8H15NO6	N-Acetyl-D-glucosamine	10	Amino Acid Metabolism	Glutamate metabolism__Aminosugars metabolism	1982179	1.24919	1	0.195479	0.0981857	0.775724	0.219845	0.105211	0.853195	0.404957	0.306794	1.12095	0.633389	0.173308	0.440966	1.92743e+06	1.98218e+06	1.71571e+06	1.7039e+06	1.71602e+06	1.91025e+06	1.36408e+06	1.12828e+06	1.16238e+06	1.67591e+06	297520	254943	249458	277345	336176	131989	169755	164542	131288	113381	1.74145e+06	835755	1.03392e+06	905207	1.10062e+06	288053	350268
p3181	259.046	16.4089	C6H14NO8P	D-Glucosamine 6-phosphate	10	Amino Acid Metabolism	Glutamate metabolism__Aminosugars metabolism	726912	2.30584	1	0.871281	15.0157	0.89835	0.430448	12.4616	0.0924762	0.0668138	0.720218	0.254702	0.0956263	2.86753	3.72613	33301.9	72419.7	98209.2	140029	66653.3	24598	16579.1	29124.6	56421.8	51351.6	21009.2	33963.1	26622.6	47904.7	25653.7	440080	726912	596950	422829	487155	23743.4	14848.8	17847.2	48191.4	55343	0	17820.8
p3011	113.048	9.5504	C5H7NO2	(S)-1-Pyrroline-5-carboxylate	8	Amino Acid Metabolism	Glutamate metabolism__Arginine and proline metabolism	1869203	1.43889	1	0.598793	0.163733	0.972991	0.602164	0.161895	2.10041	1.17383	2.19974	1.3592	2.089	0.772845	0.858957	655420	957564	1.21694e+06	339214	372312	388032	722990	661647	234932	453644	183888	298443	281648	318062	391736	68692.4	68117.7	82765.5	76564.8	106848	462124	785459	561684	280085	305416	221349	383515
p338	307.084	14.0705	C10H17N3O6S	Glutathione	8	Amino Acid Metabolism	Glutamate metabolism__Cysteine metabolism__Glutathione metabolism	123386309	0.503939	1	7.59377	8.79249	0.662311	6.20569	8.84438	0.199782	1.81169	0.113441	0.305968	0.686254	3.48093	4.19706	3.18577e+06	3.46463e+06	3.88025e+06	1.18515e+07	4.57113e+06	1.18114e+07	7.4984e+06	4.16789e+06	2.28607e+07	7.14691e+06	6.89605e+07	7.72512e+07	6.87782e+07	1.02354e+08	8.8811e+07	8.18729e+07	1.23386e+08	9.537e+07	8.36215e+07	8.60176e+07	7.44944e+06	5.5726e+06	4.31954e+06	1.06325e+07	7.4498e+06	6.50852e+07	6.79759e+07
n206	612.152	17.122	C20H32N6O12S2	Glutathione disulfide	6	Amino Acid Metabolism	Glutamate metabolism__Glutathione metabolism	336532	0.44862	1	16.7158	30.4943	1.10952	12.6477	15.993	0	8.67159	1.90405	0.264179	3.84227	21.0938	13.1055	0	0	0	10543.1	0	0	0	0	18132.4	5368.74	74056.1	51490	87781.8	97778	81734.1	115682	127540	205305	100255	167868	0	9082.44	0	6325.8	10666.7	54886.3	48576.6
p1681	250.062	13.9106	C8H14N2O5S	gamma-L-Glutamyl-L-cysteine	8	Amino Acid Metabolism	Glutamate metabolism__Glutathione metabolism	10325080	0.587252	1	1.42113	4.34151	0.666019	1.2013	4.18598	0.217454	0.37797	0.222835	0.250995	0.278703	0.698458	1.16197	999507	625225	1.19444e+06	1.54272e+06	871567	1.60688e+06	1.40318e+06	827308	2.97959e+06	2.09481e+06	4.37221e+06	1.90464e+06	1.70139e+06	2.60389e+06	2.08263e+06	8.62538e+06	7.57615e+06	7.92948e+06	7.49944e+06	7.06008e+06	932719	1.07345e+06	856123	1.27916e+06	1.79396e+06	1.92609e+06	1.81043e+06
p1262	146.069	14.9631	C5H10N2O3	L-Glutamine	10	Amino Acid Metabolism	Glutamate metabolism__Purine metabolism__Pyrimidine metabolism__D-Glutamine and D-glutamate metabolism__Nitrogen metabolism	29235588	0.727539	1	5.70852	18.6092	1.38729	3.70751	12.7768	0.33028	0.934934	0.940767	0.453594	0.882899	5.33772	5.07478	905487	278904	718801	841804	636434	1.02561e+06	717044	530531	1.58683e+06	787749	6.1782e+06	5.40749e+06	4.83817e+06	5.6875e+06	4.4205e+06	1.24811e+07	2.92356e+07	1.70142e+07	1.38253e+07	1.39349e+07	570155	3.3139e+06	375430	1.04714e+06	1.14118e+06	3.24861e+06	2.50134e+06
n165	129.043	10.1258	C5H7NO3	5-Oxoproline	10	Amino Acid Metabolism	Glutathione metabolism	57741868	1.26542	1	1.53651	1.83958	1.42916	1.61673	1.75029	1.11479	1.56893	1.68606	1.29662	1.40626	1.33473	1.43433	2.24154e+07	2.53438e+07	3.1995e+07	2.28154e+07	2.56828e+07	1.57963e+07	2.0438e+07	2.0917e+07	2.17967e+07	2.24032e+07	1.96839e+07	3.24187e+07	2.98564e+07	3.67074e+07	3.70608e+07	3.95864e+07	2.56644e+07	3.83467e+07	4.14923e+07	4.13541e+07	1.89209e+07	5.77419e+07	1.9119e+07	2.25519e+07	2.65132e+07	2.77616e+07	3.36477e+07
p1	117.079	11.4267	C5H11NO2	Betaine	10	Amino Acid Metabolism	Glycine, serine and threonine metabolism	667780996	0.426101	1	3.15463	5.01614	0.903542	2.38485	4.34842	0.319361	0.343982	0.298578	0.601091	0.227973	3.28382	1.86165	3.31367e+07	1.83875e+07	3.41147e+07	6.56563e+07	3.64978e+07	7.16076e+07	4.65382e+07	3.14158e+07	1.66925e+08	1.24237e+08	4.18187e+08	2.1282e+08	1.45838e+08	3.11191e+08	3.02284e+08	3.59974e+08	4.99013e+08	5.04336e+08	4.03127e+08	4.44284e+08	6.13834e+07	4.86897e+07	3.27843e+07	1.14275e+08	1.4108e+08	2.38446e+08	1.87121e+08
p1993	142.074	13.0978	C6H10N2O2	Ectoine	6	Amino Acid Metabolism	Glycine, serine and threonine metabolism	389118	0.89793	1	1.60374	6.68829	1.06987	1.60392	6.50653	0.827209	1.12604	1.1739	0.943513	1.10832	1.49077	2.33028	33795.2	37255.3	48882.1	52727.3	46376.5	56308.8	46278.8	45368.4	48268.2	47710.6	67057.5	55072.2	89657	82830	96591.9	323247	377521	389118	273957	267665	41784.9	63875.8	35783.1	62208.7	57325.1	89328.8	81963.4
p2345	101.084	28.1483	C5H11NO	Betaine aldehyde	6	Amino Acid Metabolism	Glycine, serine and threonine metabolism	505093	1.26267	1	0.772883	0.617092	0.950475	0.779648	0.64542	1.32204	1.09077	1.29647	1.04505	1.07947	0.93653	0.802591	280590	389050	441424	411120	300412	291641	305833	293312	241001	311658	241766	226164	247200	186893	213592	161067	219621	191687	160485	157879	280750	175142	309250	371986	234830	230239	216313
p981	103.063	13.6762	C4H9NO2	N,N-Dimethylglycine	6	Amino Acid Metabolism	Glycine, serine and threonine metabolism	5463870	1.0429	1	2.23292	1.85944	1.32458	2.09862	1.63318	1.07811	1.37497	1.6807	1.10507	1.1508	1.69174	1.40034	1.3904e+06	2.08852e+06	1.98537e+06	1.41132e+06	1.74772e+06	1.70345e+06	1.46428e+06	1.61784e+06	1.71956e+06	1.76349e+06	2.58101e+06	3.1165e+06	3.23726e+06	4.0645e+06	5.46387e+06	3.45677e+06	2.67542e+06	2.99234e+06	2.95448e+06	3.29599e+06	2.17484e+06	2.3191e+06	2.1024e+06	2.20337e+06	2.15276e+06	3.8794e+06	3.133e+06
p2169	131.07	14.6056	C4H9N3O2	Creatine	8	Amino Acid Metabolism	Glycine, serine and threonine metabolism__Arginine and proline metabolism	1097229	1.1455	1	1.57824	12.1964	1.19855	1.33602	11.0148	1.71024	1.46494	1.39538	0.885675	1.0214	1.23018	2.80677	76632.2	72440.6	85337.3	103100	74444	49135.2	74029.6	75435.6	79609.2	81418.9	94184.5	102781	119968	116240	134407	673746	1.07392e+06	1.00659e+06	692810	939100	103092	104346	70402	73042.8	80148.6	80599.4	99735.3
p2171	103.1	19.7111	C5H13NO	Choline	10	Amino Acid Metabolism	Glycine, serine and threonine metabolism__Glycerophospholipid metabolism	5526362	1.20757	1	1.548	13.8479	1.4018	1.50485	16.2036	1.41407	1.7999	2.454	1.31482	1.56755	2.08867	3.75707	339031	316632	420258	271188	334794	264309	270416	321422	225746	310911	327638	443583	454302	489019	441519	4.04049e+06	3.67421e+06	4.76749e+06	3.89718e+06	2.90805e+06	242361	653210	506813	289250	260792	312699	459813
n2579	104.011	15.3195	C3H4O4	Hydroxypyruvate	6	Amino Acid Metabolism	Glycine, serine and threonine metabolism__Glyoxylate and dicarboxylate metabolism	487135	1.37249	1	0.942068	1.38256	1.55694	1.00252	1.32819	1.28531	1.30828	2.65778	1.50597	1.57073	1.55428	1.3897	198284	168592	279777	131694	151067	127622	154438	140817	114636	139659	114215	118621	119432	151000	134675	170082	167251	288975	156360	153560	148327	448315	158817	146562	152299	121806	162046
p1785	105.043	15.6737	C3H7NO3	L-Serine	10	Amino Acid Metabolism	Glycine, serine and threonine metabolism__Methionine metabolism__Cysteine metabolism__Cyanoamino acid metabolism__Sphingolipid metabolism__Methane metabolism__Sulfur metabolism	10809089	1.00729	1	1.57905	1.30972	1.26962	1.76372	1.24895	0.798403	1.35217	1.24316	1.00241	1.06686	1.06773	1.27291	4.42262e+06	4.4502e+06	6.61043e+06	5.18409e+06	5.25693e+06	4.79975e+06	4.88058e+06	5.12273e+06	5.96792e+06	4.96571e+06	6.15901e+06	8.29668e+06	8.11164e+06	8.9135e+06	9.15867e+06	7.74159e+06	6.25089e+06	5.82035e+06	6.48371e+06	7.41135e+06	6.58664e+06	8.10866e+06	5.69161e+06	6.14492e+06	6.14411e+06	9.74754e+06	8.27346e+06
p3589	121.02	13.5517	C3H7NO2S	L-Cysteine	8	Amino Acid Metabolism	Glycine, serine and threonine metabolism__Methionine metabolism__Cysteine metabolism__Penicillin and cephalosporin biosynthesis__Taurine and hypotaurine metabolism__Glutathione metabolism__Thiamine metabolism__Pantothenate and CoA biosynthesis	327112	0.841615	1	0.96297	0.490079	0.939524	1.08109	0.710881	0.906317	0.557127	0.277994	1.02525	0.449847	0.583586	0.702533	160297	213714	196376	166927	129913	213699	199517	147935	251123	218158	136652	210514	92404.7	244513	308192	46236.1	160614	66501.1	147260	84382	206406	226610	77804	228480	228816	244617	192947
n1404	102.032	7.57148	C4H6O3	2-Oxobutanoate	6	Amino Acid Metabolism	Glycine, serine and threonine metabolism__Methionine metabolism__Valine, leucine and isoleucine biosynthesis__Propanoate metabolism__C5-Branched dibasic acid metabolism	1293696	0.976393	1	2.56312	2.10901	1.42228	2.37954	1.65097	1.22856	1.85284	1.95147	1.1864	1.73338	1.50134	1.61423	331930	312482	584844	281218	251224	216211	483171	449622	313037	342252	365750	940225	939221	1.08574e+06	1.2937e+06	1.21837e+06	293676	515239	845804	932179	299372	1.10253e+06	451488	352453	360373	484998	931903
p3823	131.058	13.5063	C5H9NO3	5-Aminolevulinate	8	Amino Acid Metabolism	Glycine, serine and threonine metabolism__Porphyrin and chlorophyll metabolism	129389	1.39677	1	1.89301	1.94949	0.859062	1.85309	2.02761	1.11919	1.45058	1.38324	1.16559	1.18535	1.43141	1.63473	69929.5	56638.4	62109.9	42137.6	60864.8	44790.1	32157.4	37512.6	34271.9	60092.8	58882.2	75713.1	85183	94460.7	81069.1	96023	80028	65556.8	91725.9	73768.2	29248.4	26084.4	43834.6	42142.6	38083.6	78607.8	67156.3
n2039	119.058	14.3606	C4H9NO3	L-Threonine	10	Amino Acid Metabolism	Glycine, serine and threonine metabolism__Valine, leucine and isoleucine biosynthesis__Porphyrin and chlorophyll metabolism	2704550	0.99513	1	1.101	0.780262	1.07579	1.11125	0.793971	0.95218	1.16233	1.22267	1.05874	1.09179	0.925925	0.86097	1.50158e+06	1.69529e+06	1.9292e+06	2.084e+06	2.07624e+06	1.78399e+06	1.69982e+06	1.67706e+06	2.0314e+06	2.13949e+06	2.08837e+06	1.97206e+06	1.99066e+06	2.13057e+06	2.09258e+06	1.35887e+06	1.48931e+06	1.2897e+06	1.71718e+06	1.42617e+06	1.87484e+06	2.12873e+06	1.72396e+06	2.05415e+06	2.25733e+06	2.07098e+06	2.05345e+06
p1463	138.043	10.6902	C6H6N2O2	Urocanate	10	Amino Acid Metabolism	Histidine metabolism	30736086	0.851284	1	0.715202	0.416795	1.08191	0.734422	0.364419	0.71786	0.653535	1.63283	0.983139	0.576333	0.684544	0.674071	1.13689e+07	1.54901e+07	1.30225e+07	1.38685e+07	1.24717e+07	1.73261e+07	1.704e+07	1.47525e+07	1.55292e+07	1.31425e+07	9.42866e+06	1.06715e+07	1.11672e+07	1.2752e+07	1.16166e+07	5.67957e+06	8.83562e+06	5.22262e+06	5.78036e+06	6.90444e+06	1.88927e+07	1.78163e+07	1.67534e+07	1.43255e+07	1.63745e+07	1.11056e+07	1.09198e+07
p1636	174.064	14.454	C6H10N2O4	N-Formimino-L-glutamate	8	Amino Acid Metabolism	Histidine metabolism	19515814	0.666962	1	1.40029	1.14449	1.02148	1.29452	1.21253	0.542396	0.7945	2.33564	0.709141	0.701934	0.713902	0.956618	2.81582e+06	3.95623e+06	3.40204e+06	4.00215e+06	3.50106e+06	5.10852e+06	4.06331e+06	5.57527e+06	6.15713e+06	5.59995e+06	7.01523e+06	6.84e+06	7.77404e+06	7.61883e+06	7.86553e+06	4.87933e+06	8.81037e+06	5.99187e+06	4.52124e+06	6.13089e+06	6.0973e+06	4.4838e+06	5.18245e+06	5.78396e+06	5.52587e+06	6.73211e+06	6.20803e+06
p2246	169.085	12.9064	C7H11N3O2	N(pi)-Methyl-L-histidine	8	Amino Acid Metabolism	Histidine metabolism	237310	0	0	0	219.833	0	0	199.342	0	0	0	0	0	0	7.06097	0	0	0	0	0	0	0	0	0	0	0	0	0	0	0	223504	237310	230314	179038	229001	0	0	0	0	0	0	0
p2362	258.085	13.599	C10H14N2O6	(1-Ribosylimidazole)-4-acetate	6	Amino Acid Metabolism	Histidine metabolism	962428	0.619546	1	1.20199	0.821796	1.24136	1.23928	0.837257	0.744706	1.00301	0.876587	0.733383	0.85137	0.599836	0.920466	299168	282226	453601	294632	295682	449468	498223	450892	679295	545508	699689	668399	551946	556945	676303	450805	303749	360153	484980	556203	481147	962428	586875	566876	659243	620501	606436
p2674	197.117	12.2847	C9H15N3O2	Hercynine	6	Amino Acid Metabolism	Histidine metabolism	226621	0.927549	1	1.42443	1.54712	1.11322	1.37711	1.51475	0.796614	1.08955	1.02597	0.844071	0.869755	1.06788	1.1089	102491	106414	169769	108739	88052.7	127601	89520.8	141247	147701	114346	165021	162608	150857	214588	190663	216220	165334	173168	178518	226621	138147	189648	96187.5	119974	146699	144215	174306
p2823	126.043	11.4435	C5H6N2O2	Imidazole-4-acetate	10	Amino Acid Metabolism	Histidine metabolism	1397560	0.911557	1	2.26161	17.5413	1.15959	1.55584	20.616	0.732686	1.14238	3.4871	1.2296	0.793374	7.39588	5.07234	32605.3	46846.5	0	30895.7	26507.5	27947.6	33630	33136.4	31782.6	23636.7	28052	67307.8	62614.2	81110.9	100459	558294	349952	913064	380169	432050	38025.1	34167.3	36627.5	30029.3	35243.1	46366.4	37875.9
p3388	111.08	23.5895	C5H9N3	1H-Imidazole-4-ethanamine	10	Amino Acid Metabolism	Histidine metabolism	701459	0.72715	1	0.193817	1.5648	0.891823	0.182793	1.85848	0.317686	0.0331537	1.25277	0.429296	0.0104804	3.88529	0.881882	95237.3	56084.2	66938.3	101664	63228.9	153942	81171.7	122309	102889	66611.5	19229.1	17100.4	16111	21536.6	28149.5	117326	171589	244329	136969	154317	127204	71443	82465.9	104783	84027.1	19316.1	17693.1
p3477	154.038	10.1395	C6H6N2O3	Imidazol-5-yl-pyruvate	8	Amino Acid Metabolism	Histidine metabolism	405791	0.594064	1	0.617044	0.241553	1.1237	0.531916	0.236994	0.892795	0.58227	0.456726	1.005	0.683792	0.27286	0.53435	152216	235358	191970	195555	166756	351445	302156	354915	304861	272066	129955	191088	187536	219554	250156	62065.1	131376	39304.1	52944.7	97279.1	401713	357122	392483	346006	284245	158754	174409
p3494	153.09	8.61735	C7H11N3O	4-(beta-Acetylaminoethyl)imidazole	6	Amino Acid Metabolism	Histidine metabolism	150395	0.959169	1	0.556128	4.01724	1.27971	1.11097	5.00957	1.38053	1.05767	2.34587	1.155	1.40724	5.35292	2.15997	29468	0	26656.3	0	21570.9	23591.7	0	23342.8	15188.7	18879.4	20320.5	11009.3	0	0	13718	63247.4	56932	106716	52131.4	46380.7	27948.6	15485	17973	19392.8	22860.6	15886.9	15897.5
p3649	139.074	7.76272	C6H9N3O	L-Histidinal	8	Amino Acid Metabolism	Histidine metabolism	245440	0	0	0	119.479	0	0	211.698	12.5041	0	51.7177	4.3952	0	134.159	50.3948	0	0	0	0	0	0	0	0	0	0	0	0	0	0	0	144270	139036	75532.3	127979	110576	0	0	0	0	0	0	0
p3651	156.053	10.9685	C6H8N2O3	4-Imidazolone-5-propanoate	8	Amino Acid Metabolism	Histidine metabolism	263128	0.733606	1	1.08333	0.49181	0.853726	0.952213	0.467114	0.649484	0.672466	0.179232	0.639582	0.455722	0.231067	0.57878	148090	132072	106459	195152	153635	213446	135623	204659	250492	198238	188032	195880	215543	223413	263128	52280.8	203324	98362	38185.2	100866	229320	99548.7	162432	179813	184711	193281	149736
p262	155.069	14.5195	C6H9N3O2	L-Histidine	8	Amino Acid Metabolism	Histidine metabolism__beta-Alanine metabolism	61086207	0.851063	1	1.41469	1.34275	1.13044	1.41579	1.23566	0.737572	1.27145	0.678072	0.919272	0.982346	0.657893	1.11941	2.59683e+07	2.82017e+07	4.18926e+07	3.05707e+07	3.09156e+07	3.6332e+07	3.86018e+07	3.60441e+07	3.96882e+07	3.4454e+07	4.26119e+07	5.34892e+07	5.02175e+07	6.10862e+07	5.44819e+07	4.84506e+07	4.4878e+07	4.43757e+07	5.28101e+07	5.80554e+07	3.83457e+07	5.18513e+07	3.74789e+07	4.17419e+07	3.98488e+07	4.99093e+07	5.50128e+07
p2428	717.271	17.2397	C30H39N9O12	5-Methyltetrahydropteroyltri-L-glutamate	8	Amino Acid Metabolism	homoserine and methionine biosynthesis __ methionine biosynthesis II __ methionine biosynthesis III __ superpathway of methionine biosynthesis (by sulfhydrylation) __ superpathway of methionine biosynthesis (transsulfuration)	3449706	0.689532	1	4.38886	3.94815	0.808337	3.68345	3.75053	0.208162	2.35683	0.169731	0.468247	1.07017	2.51217	3.01387	278987	335433	364734	716219	440775	576343	299716	359123	1.2169e+06	645883	2.34704e+06	2.51688e+06	2.39488e+06	3.44971e+06	2.88805e+06	2.59252e+06	2.49827e+06	2.54348e+06	2.26943e+06	2.32755e+06	547538	451581	291100	765394	448591	2.1064e+06	2.35934e+06
n1139	171.053	13.5635	C7H9NO4	2,3,4,5-Tetrahydrodipicolinate	6	Amino Acid Metabolism	Lysine biosynthesis	379486	0.703501	1	4.31706	14.0323	0.8535	4.0902	12.8346	0.672817	2.00068	1.49985	0.786172	1.06545	4.22797	4.89573	9695.3	9836.56	11133.1	11959.7	13457.8	7509.62	21260.7	9964.83	27135.7	13848.1	39694.9	74778.7	52040.2	101058	76580.1	275382	360288	148334	135863	198778	10304.4	18039.4	7726.89	15253.7	16715.9	50902.6	54563.2
n2078	203.08	12.6493	C8H13NO5	N2-Acetyl-L-aminoadipate	8	Amino Acid Metabolism	Lysine biosynthesis	1902033	0.585307	1	5.51428	46.6996	0.923509	3.99542	41.3926	0.546841	1.11464	1.77179	0.582084	0.879196	3.93794	9.85291	13196.3	13863.4	18334.3	16942	12244.2	40233.9	16815.2	12791.5	38215.4	19364.6	68528.3	147239	106457	184044	196364	954805	1.90203e+06	1.32598e+06	912437	855230	31785.6	35694.9	14819.2	18589.7	16784.5	76066.3	116720
p1045	290.111	13.7824	C11H18N2O7	N-Succinyl-LL-2,6-diaminoheptanedioate	6	Amino Acid Metabolism	Lysine biosynthesis	239457	0	0	0	165.633	0	0	125.583	0	0	0	0	0	0	0	0	0	0	0	0	0	0	0	0	0	0	0	0	0	0	141428	239457	197186	115551	134542	0	0	0	0	0	0	0
p2170	190.095	14.67	C7H14N2O4	meso-2,6-Diaminoheptanedioate	6	Amino Acid Metabolism	Lysine biosynthesis	733517	1.22057	1	3.39197	31.7194	2.49133	2.80534	27.414	0.852986	1.64554	2.52817	0.837774	1.62866	2.35516	7.95378	0	27792.7	43853.8	37719.9	0	0	0	22072.1	37171.4	30358.9	71037.9	53660.2	64250.1	57256.2	57724.4	483797	733517	707008	502966	414851	31077.7	65885.9	33757.4	57370.8	35137.6	34733.9	64704.3
p2767	203.079	11.9425	C8H13NO5	N2-Acetyl-L-aminoadipate	8	Amino Acid Metabolism	Lysine biosynthesis	2629877	1.22046	1	0.185616	0.402237	0.750212	0.209612	0.350988	0.881918	0.434236	0.291378	1.19067	0.608506	0.153723	0.436891	2.22166e+06	2.62988e+06	2.02582e+06	2.08133e+06	1.84525e+06	2.20155e+06	1.71909e+06	1.40595e+06	1.48342e+06	2.04237e+06	340240	264701	319973	363315	354918	555096	1.13117e+06	699733	697246	477499	2.00917e+06	1.05419e+06	1.24852e+06	1.11135e+06	1.21794e+06	353821	445195
p3479	190.095	18.1354	C7H14N2O4	LL-2,6-Diaminoheptanedioate	10	Amino Acid Metabolism	Lysine biosynthesis	353236	0	1	3.19023	10.0437	0.952995	3.06944	9.97176	0.417545	0.994201	1.58491	1.05379	0	5.07055	4.00779	0	0	0	0	0	0	15266.2	17179.7	49243.1	18922.8	81161.4	71397.8	61909.5	54830.5	51675.4	296181	353236	128289	121477	111332	0	39774.6	13462.9	25146.9	17498.2	62587.2	61757.3
p1051	146.105	22.6116	C6H14N2O2	L-Lysine	10	Amino Acid Metabolism	Lysine biosynthesis__Lysine degradation__Biotin metabolism__Alkaloid biosynthesis II	29626280	0.971433	1	1.23479	1.12469	1.03923	1.21379	1.05059	0.726961	1.0063	0.843289	0.799043	0.802781	0.806522	1.00041	1.93939e+07	1.94457e+07	2.87236e+07	2.07883e+07	1.96565e+07	2.20939e+07	2.28662e+07	2.19362e+07	2.38655e+07	2.04223e+07	2.8461e+07	2.81282e+07	2.6445e+07	2.80931e+07	2.61616e+07	2.55768e+07	2.39551e+07	2.74167e+07	2.6006e+07	2.20929e+07	2.17758e+07	2.36559e+07	2.11981e+07	2.38854e+07	2.50304e+07	2.57517e+07	2.60356e+07
p2536	161.069	14.7585	C6H11NO4	L-2-Aminoadipate	8	Amino Acid Metabolism	Lysine biosynthesis__Lysine degradation__Penicillin and cephalosporin biosynthesis	2597308	0.850276	1	1.02811	7.80685	0.833467	0.846104	7.24856	0.679307	0.623484	2.3552	0.667035	0.513423	9.12711	2.90798	153561	108717	117973	282592	205264	228416	164573	132008	289236	206738	336421	180121	170453	194846	167829	1.80678e+06	1.51258e+06	2.14106e+06	1.5204e+06	989735	214911	127196	127995	189297	191547	187475	176320
n1775	596.671	16.4078	C41H65N9O28P2	UDP-N-acetylmuramoyl-L-alanyl-D-glutamyl-6-carboxy-L-lysyl-D-alanyl- D-alanine	6	Amino Acid Metabolism	Lysine biosynthesis__Peptidoglycan biosynthesis	3239290	0.693414	1	1.44593	1.31831	0.650012	1.29491	1.42235	0.795211	0.962742	0.308693	0.823017	0.53633	0.854978	1.17295	781904	1.13848e+06	1.01828e+06	1.48909e+06	771462	1.10777e+06	1.22811e+06	1.21102e+06	2.67007e+06	1.28104e+06	1.55608e+06	2.1581e+06	1.67149e+06	3.23929e+06	2.21662e+06	2.28247e+06	2.3605e+06	1.59885e+06	1.87469e+06	1.76814e+06	907061	922773	799557	1.29924e+06	945165	1.55072e+06	1.99682e+06
n2979	525.633	17.3176	C35H55N7O26P2	UDP-N-acetylmuramoyl-L-alanyl-D-gamma-glutamyl-meso-2,6- diaminopimelate	8	Amino Acid Metabolism	Lysine biosynthesis__Peptidoglycan biosynthesis	267923	1.81598	1	0.483608	0.317813	0.891466	0.503515	0.355004	1.31537	0.297765	0.492075	2.36454	0.246511	0.356718	0.86982	153263	204564	209571	205863	128916	85931.1	80309.3	65697.7	142842	122018	35486	51588.9	39785.4	61333.7	52061.7	38214.3	33309.2	32884.6	32902.8	20577.9	102639	76814	88979.5	95969.3	78477.3	42761.2	48322.8
p1263	188.116	15.0143	C8H16N2O3	N6-Acetyl-L-lysine	6	Amino Acid Metabolism	Lysine degradation	18446152	0.445588	1	1.72675	9.6514	0.738021	1.43581	7.57282	0.362659	0.638097	0.497346	0.438785	0.34511	3.06224	3.24233	375789	446665	483839	782308	513797	1.00036e+06	881075	678338	2.19505e+06	1.08555e+06	2.26438e+06	1.99243e+06	1.75533e+06	2.40885e+06	1.66388e+06	1.29989e+07	1.84462e+07	1.02737e+07	9.20212e+06	5.44682e+06	735750	704167	764225	1.00902e+06	1.09716e+06	1.44905e+06	1.85443e+06
p1801	161.105	13.2923	C7H15NO3	L-Carnitine	8	Amino Acid Metabolism	Lysine degradation	1112495	1.43842	1	7.11301	13.0239	1.18703	5.49851	11.7764	0.941189	2.62425	1.39789	1.16573	1.51893	2.8393	4.60905	90688.3	70775	105079	151996	57654.4	73237.9	59483.8	57354.7	68416.4	72559.9	380362	474272	362195	530923	607029	733629	1.1125e+06	939100	762038	764321	58343.1	92464.4	57415.4	85406.4	99339.1	332861	382110
p259	187.085	7.92769	C8H13NO4	6-Acetamido-2-oxohexanoate	6	Amino Acid Metabolism	Lysine degradation	203037	1.72292	1	0.739212	0.896229	1.00136	0.805339	0.733474	1.24647	1.08471	1.4049	1.14701	1.10526	1.1677	1.04096	203037	83418.4	158465	72933.8	69478.9	91820.8	65810.5	64545.5	59182	59534.2	49210.8	52253.3	47937.6	51894.7	50695.6	47411.9	59955	73153.9	64900.1	60097.4	85668.5	41270.3	74868	67661.9	71886.5	60999.3	57486.5
p2738	204.111	9.51577	C8H16N2O4	N6-Acetyl-N6-hydroxy-L-lysine	8	Amino Acid Metabolism	Lysine degradation	1622901	1.25069	1	0.828419	1.26526	1.40757	0.864182	1.19342	1.10397	0.759963	1.5206	1.0512	0.864053	1.11873	1.00315	574215	507674	1.22231e+06	436641	496024	445555	609226	545930	454650	532698	389016	447515	439474	447928	420065	747686	362895	730730	756169	677080	454225	1.6229e+06	548033	506048	511678	456245	463468
p3023	218.127	14.3842	C9H18N2O4	N2-(D-1-Carboxyethyl)-L-lysine	6	Amino Acid Metabolism	Lysine degradation	337017	0.594123	1	1.38861	1.0037	0.923501	1.31681	1.00836	0.398539	0.810553	0.44868	0.523091	0.499659	0.595318	0.858509	85412.3	112976	125552	166948	119342	194053	145083	169280	306184	212511	337017	268587	238261	278057	304337	248269	127013	149213	249512	256910	175060	195477	154107	219191	204704	310771	185419
p3387	159.09	12.8289	C7H13NO3	5-Acetamidopentanoate	8	Amino Acid Metabolism	Lysine degradation	504280	1.58434	1	1.38145	2.12597	1.16193	1.04788	2.70582	1.88328	1.99307	1.89668	1.78017	2.04645	1.85209	3.11493	25815.4	26712.4	33113.2	23722	29608.1	30662.5	0	0	27022.1	30030.8	25896	24670	30531.4	40077.2	0	32967.7	54532.2	33514.4	29092	36374	0	24314.3	24782.1	16053.1	36769.2	40943.7	0
p2789	129.079	12.4302	C6H11NO2	L-Pipecolate	10	Amino Acid Metabolism	Lysine degradation__Alkaloid biosynthesis II	1463797	1.03038	1	1.77377	14.3647	1.04483	1.59967	13.8507	0.845404	1.09516	1.34596	0.834632	0.909966	2.23848	3.87326	74864.1	77594.1	113215	74481.1	72553.2	88471.5	56224.4	71691.9	90657.9	93493.5	145474	161263	109590	137869	156266	1.0706e+06	1.44607e+06	1.38963e+06	948414	898909	68392.2	102724	67975.2	89712.3	89692.7	118775	137351
n2882	145.074	13.403	C6H11NO3	Allysine	8	Amino Acid Metabolism	LysineBiosynthesis	249300	1.1262	1	1.16717	4.73743	0.908715	1.01354	4.39406	1.18123	0.989869	1.08212	1.05518	1.11596	1.75582	1.58629	43937.4	56602.6	51767.7	36198.9	40916.4	42160.5	37760.9	48710.9	33767.1	41315.7	36761.3	46628	52665.7	59774.3	41941.5	224797	249300	149822	185988	155180	38318.8	31865.7	38173.5	39618.8	37142.2	33746.2	47758.3
n2693	120.025	7.5781	C4H8O2S	3-(Methylthio)propionic acid	8	Amino Acid Metabolism	Methionine metabolism	595161	0	1	5.81642	5.10688	1.66554	4.95169	6.36536	0	7.84564	18.7972	0.859082	7.88371	16.6881	4.75326	0	0	0	0	0	35605.6	31112	58096.2	0	0	209133	134984	125414	142325	114113	142955	70758.6	133113	122242	168341	55076.7	45457.5	73152.7	34195	0	167681	145010
n2750	148.019	5.14754	C5H8O3S	[FA oxo,methyl(4:0)] 2-oxo-4-methylthio-butanoic acid	8	Amino Acid Metabolism	Methionine metabolism	578815	0.765442	1	0.628761	0.0335664	1.06733	0.491505	0	0.866507	0.471525	0.952393	1.06958	0.580283	0.33377	0.579253	290684	319569	196453	290470	206285	373671	314251	450398	306807	257759	155119	238375	215628	231410	230175	29699.4	0	0	0	27460.3	432955	278854	358573	357916	389244	130970	195006
p1796	165.046	13.3428	C5H11NO3S	L-Methionine S-oxide	8	Amino Acid Metabolism	Methionine metabolism	10368476	1.22082	1	1.2612	2.12928	1.06214	1.28266	1.99944	0.8252	1.09414	1.45197	0.917669	0.969478	1.18476	1.29127	3.75393e+06	3.60973e+06	8.1021e+06	3.97142e+06	3.91865e+06	4.00601e+06	3.67161e+06	3.52903e+06	4.24195e+06	3.68264e+06	4.68556e+06	4.85345e+06	4.17301e+06	5.16279e+06	5.25359e+06	7.80727e+06	8.05279e+06	8.29302e+06	8.10427e+06	8.47842e+06	3.38021e+06	6.17734e+06	3.24512e+06	3.69793e+06	3.81947e+06	4.65515e+06	4.80357e+06
p2360	384.122	13.6005	C14H20N6O5S	S-Adenosyl-L-homocysteine	8	Amino Acid Metabolism	Methionine metabolism	3064278	1.62315	1	0.66676	0.352475	0.899357	0.631763	0.367194	1.04365	1.13373	1.0116	1.17301	1.24568	0.622103	0.763267	1.91518e+06	3.06428e+06	2.81574e+06	2.93972e+06	2.3731e+06	1.87803e+06	1.45513e+06	1.4859e+06	1.52149e+06	1.7351e+06	1.23491e+06	991793	1.01903e+06	1.03863e+06	1.10015e+06	603331	646423	481616	592465	522634	1.90897e+06	764651	1.54794e+06	1.37477e+06	1.66656e+06	1.02648e+06	1.04317e+06
p607	149.051	11.5327	C5H11NO2S	L-Methionine	10	Amino Acid Metabolism	Methionine metabolism	67444553	0.977275	1	1.46985	1.36303	1.10101	1.44551	1.33465	0.814646	1.10409	1.16499	1.01209	0.900329	1.00026	1.0803	3.15954e+07	3.48433e+07	5.35854e+07	3.78288e+07	4.02285e+07	4.1884e+07	3.75099e+07	3.69877e+07	4.72828e+07	3.90233e+07	6.15441e+07	5.22084e+07	5.74436e+07	6.73161e+07	5.94089e+07	5.91201e+07	4.76932e+07	4.784e+07	6.13418e+07	6.02741e+07	3.92774e+07	5.8763e+07	3.89868e+07	4.26621e+07	4.34716e+07	5.80504e+07	5.36301e+07
p1004	219.074	13.6649	C8H13NO6	O-Succinyl-L-homoserine	8	Amino Acid Metabolism	Methionine metabolism__Sulfur metabolism	111504	0.244628	1	1.24768	1.14787	1.05151	1.24445	1.12225	0.391079	0.931422	0.90983	0.495587	0.880764	0.979378	0.895611	0	0	35651.2	25156.6	19469.9	47274.1	54639.4	48746.1	98673.9	78828	88805.8	76336.1	66643.7	96513	81142.1	71165.5	93410.7	71411.9	64023.2	76674.5	71084.3	73596.6	60661.5	66465.8	73257.2	87616.4	73079.3
p2862	161.069	11.0314	C6H11NO4	O-Acetyl-L-homoserine	8	Amino Acid Metabolism	Methionine metabolism__Sulfur metabolism	1305359	0.721114	1	0.879707	3.02256	0.75303	0.755193	2.31636	0.653452	0.718469	0.768627	0.638211	0.57065	1.63606	1.14169	134950	134218	233385	246591	223021	190212	192913	215530	385335	364153	260494	210957	190812	276046	247660	438078	752578	602656	976167	1.30536e+06	166145	205522	180236	208463	254825	204672	200725
n1449	182.058	8.76421	C9H10O4	3-(2,3-Dihydroxyphenyl)propanoate	8	Amino Acid Metabolism	Phenylalanine metabolism	6241083	0.516995	1	1.11795	0.227055	0.86893	0.946762	0.206357	0.538196	0.680993	0.0499761	0.59058	0.446971	0.0356394	0.495926	2.09881e+06	2.57948e+06	1.58609e+06	3.66101e+06	2.75039e+06	5.16424e+06	3.96771e+06	5.44014e+06	5.83597e+06	4.11011e+06	4.49435e+06	5.16221e+06	5.3536e+06	6.15892e+06	6.24108e+06	1.38844e+06	979735	675399	1.20837e+06	1.31501e+06	5.33243e+06	2.86682e+06	4.32105e+06	4.51341e+06	4.27085e+06	4.61155e+06	4.0963e+06
n2785	166.063	7.43903	C9H10O3	3-(3-Hydroxy-phenyl)-propanoic acid	8	Amino Acid Metabolism	Phenylalanine metabolism	389469	0.594176	1	0.974408	0.1685	0.870562	0.706379	0.180127	0.648774	0.499482	0.126134	0.696643	0.420108	0.0758063	1.30203	149961	146125	86510	133669	122205	240337	259413	191392	213107	170298	230545	303095	242094	127290	144023	55935.8	27459	27254.2	37613.7	32798.8	291036	176607	208851	147529	111437	204668	112096
n3077	165.079	14.2345	C9H11NO2	D-Phenylalanine	8	Amino Acid Metabolism	Phenylalanine metabolism	194269	1.41752	1	1.05193	0.401364	1.25287	1.00906	0.378663	0.277601	0.380293	0.215205	0.470316	0.330198	0.421221	0.582462	76004.7	143491	156128	194269	115844	78790.7	64802.2	63680.9	164452	112032	160599	76392.2	83228	98711.2	89948.3	48084.2	21756.3	41219.5	40550.9	42552.1	90707.3	118238	95642	134080	167418	99522.9	79586
n991	150.068	5.09612	C9H10O2	Phenylpropanoate	6	Amino Acid Metabolism	Phenylalanine metabolism	15450543	1.86605	1	0.241181	0.367907	0.478564	0.241106	0.339218	1.2693	0.199909	0.535083	0.68413	0.201097	0.298845	0.395131	1.54505e+07	2.86602e+06	6.36729e+06	3.38744e+06	3.03205e+06	5.19755e+06	5.74346e+06	1.02848e+06	2.63773e+06	2.06078e+06	1.54965e+06	686958	603452	722889	457062	663900	752774	970542	3.26264e+06	482418	1.60828e+06	2.31108e+06	772287	1.38526e+06	1.89981e+06	779534	1.41224e+06
p3711	264.111	7.77468	C13H16N2O4	alpha-N-Phenylacetyl-L-glutamine	8	Amino Acid Metabolism	Phenylalanine metabolism	223629	0.834226	1	1.16381	0.915341	1.12816	1.10166	0.939157	0.776115	0.931306	0.956196	0.804863	0.800713	0.93957	0.952576	98231.3	87005.1	174565	132912	121029	149613	143770	139772	171614	130934	168280	172480	155175	220143	140140	126641	134951	120549	138278	153001	192262	174228	147519	157800	158182	159987	166301
n75	114.032	16.0184	C5H6O3	2-Hydroxy-2,4-pentadienoate	6	Amino Acid Metabolism	Phenylalanine metabolism__Benzoate degradation via hydroxylation__Biphenyl degradation__Toluene and xylene degradation__1,4-Dichlorobenzene degradation__Fluorene degradation__Carbazole degradation__Ethylbenzene degradation__Styrene degradation	143164	0.982446	1	7.36332	7.85704	0.954398	6.14557	8.04531	0.94241	2.73968	0.944055	0.971676	1.83041	2.12335	3.45883	14509.1	15294.8	13634.3	12171.5	14702	16280.4	13150.4	16037.8	13131.3	12968.1	81796.8	100900	94680.9	135036	114565	121387	123444	122323	95155.9	100003	13566.3	10769.8	15057	14428.8	14482.5	82049.9	94310.3
n994	164.047	4.98436	C9H8O3	Phenylpyruvate	8	Amino Acid Metabolism	Phenylalanine metabolism__Phenylalanine, tyrosine and tryptophan biosynthesis	6802573	0.928901	1	0.49301	0.107935	1.38139	0.513924	0.113896	1.49393	0.651809	0.522303	1.43557	1.05083	0.201829	0.599705	2.86083e+06	3.67046e+06	3.49286e+06	2.25664e+06	2.63837e+06	2.78804e+06	3.4476e+06	4.42118e+06	2.13303e+06	3.27124e+06	1.19127e+06	1.58191e+06	1.79249e+06	1.48044e+06	1.87217e+06	353058	193743	404678	377938	404132	3.69911e+06	6.76401e+06	5.01936e+06	3.30096e+06	3.40319e+06	1.66787e+06	1.81362e+06
p386	165.079	10.2203	C9H11NO2	L-Phenylalanine	10	Amino Acid Metabolism	Phenylalanine metabolism__Phenylalanine, tyrosine and tryptophan biosynthesis__Phenylpropanoid biosynthesis__Alkaloid biosynthesis II	98021735	0.953445	1	1.57329	1.08935	1.30251	1.55045	1.0744	0.823584	1.19828	0.624207	1.00822	0.9853	0.481883	0.995118	3.43022e+07	3.7965e+07	6.27278e+07	4.62178e+07	4.41335e+07	4.89633e+07	4.96544e+07	4.48776e+07	4.86308e+07	4.42236e+07	8.57261e+07	6.7141e+07	6.9096e+07	8.05331e+07	6.93513e+07	6.17108e+07	3.47423e+07	5.07292e+07	5.52685e+07	5.50157e+07	5.03752e+07	9.12279e+07	5.56594e+07	5.44763e+07	5.61097e+07	9.80217e+07	6.34659e+07
n630	136.052	7.56902	C8H8O2	Phenylacetic acid	6	Amino Acid Metabolism	Phenylalanine metabolism__Styrene degradation	4941498	1.64152	1	0.807262	3.56622	0.721252	1.12471	4.23564	1.30696	0.954423	32.9153	1.21156	1.3293	22.0165	4.49407	131057	188629	133017	113142	87639	126013	66595.8	74684	60173	70630.1	56546.8	56378.7	60625.7	49944.7	97872.1	381104	216026	256529	292791	273246	24971.9	66977.4	71210.8	60889.2	63078.3	49475.8	54038.9
p3252	312.022	15.9751	C9H16N2O5Se	gamma-Glutamyl-Se-methylselenocysteine	8	Amino Acid Metabolism	Selenoamino acid metabolism	930633	1.63486	1	0.150828	0.0107641	0.833099	0.144913	0.0551836	0.506516	0.220569	0.409334	0.724752	0.223267	0.400014	0.224874	655962	829987	901399	930633	686349	479254	422954	476450	568165	502520	108115	56837.6	59684.4	70082.1	74710.1	0	26364.9	0	0	0	447681	236102	469653	416717	470393	62240.1	65063.7
p1868	163.067	13.276	C6H13NO2S	S-Methyl-L-methionine	6	Amino acid Metabolism	S-methylmethionine cycle __ dimethylsulfoniopropionate biosynthesis II (Spartina) __ dimethylsulfoniopropionate biosynthesis I (Wollastonia) __ methionine biosynthesis II __ superpathway of lysine, threonine and methionine biosynthesis II	509556	0	0	0	416.302	0	0	400.483	0	0	0	0	0	26.4438	99.2318	0	0	0	0	0	0	0	0	0	0	0	0	0	0	0	509556	504094	367212	363384	337265	0	0	0	0	0	0	0
n1371	139.978	17.4289	C2H4O5S	Sulfoacetate	6	Amino Acid Metabolism	Taurine and hypotaurine metabolism	169184	1.17563	1	0.794832	0.717502	1.14308	0.819327	0.70363	1.23049	1.0554	1.14633	1.14255	1.1293	0.894491	1.43333	127819	122955	136630	113169	106609	103972	93795	111226	94417	113062	97111.2	82741.5	84674.6	71262.2	74719.5	99820.1	79969.9	55813.9	67801	67165.3	112288	169184	116570	92631.6	99697.8	86184.7	85312.9
n1955	203.058	7.5766	C11H9NO3	Indolepyruvate	8	Amino Acid Metabolism	Tryptophan metabolism	2874323	0.960681	1	0.462536	0.0886939	1.40229	0.512593	0.0883801	1.51213	0.717933	0.730516	1.47096	1.04461	0.290166	0.702437	1.28749e+06	1.94529e+06	1.57932e+06	883676	1.12923e+06	928515	1.52516e+06	2.08185e+06	1.07276e+06	1.49605e+06	542096	696720	627378	634467	785350	128415	76133.7	126967	131467	167130	1.78215e+06	2.48407e+06	2.57079e+06	1.54819e+06	1.5771e+06	711879	698903
n3067	165.043	14.6234	C8H7NO3	Formylanthranilate	8	Amino Acid Metabolism	Tryptophan metabolism	221912	1.0634	1	0.893271	0.662444	0.932987	0.901131	0.692766	1.20874	1.00651	1.26597	1.18134	1.22587	0.941522	0.871334	167028	172850	154737	162124	175799	160794	146837	170183	139237	165850	109313	131815	156980	136433	164801	100792	106802	84016.8	110965	116052	157656	118027	163214	137676	153863	135563	134986
p1890	236.08	10.0712	C11H12N2O4	L-Formylkynurenine	6	Amino Acid Metabolism	Tryptophan metabolism	175376	1.20083	1	0.716204	0.634203	0.851482	0.737828	0.64702	1.03702	0.87093	1.21347	1.10241	1.09097	0.881953	0.814586	162400	105155	156732	97267.9	111088	119837	92469	115472	85659.5	113401	82715.2	63464.9	111577	45807.3	73759.7	67845.1	65152.2	52978.2	65182	82965.2	108977	38320.9	94125.5	83078.1	124092	70272	71109.9
p2132	207.053	9.87469	C10H9NO4	4-(2-Aminophenyl)-2,4-dioxobutanoate	6	Amino Acid Metabolism	Tryptophan metabolism	157388	0.957264	1	1.79577	1.70795	1.24778	1.68796	1.61506	0.929733	1.55819	1.76425	1.12444	1.46761	1.33708	1.40903	56331.1	41276.5	73068.3	57022.9	62992.1	50905.4	46656.4	66464.9	73286.3	66355.3	94816.7	112467	99488.4	112358	126189	115911	83902.4	90598.8	121136	107102	66055.2	136091	33260.2	60665.4	82840.6	97100.5	95554.6
p2620	205.074	7.7423	C11H11NO3	Indolelactate	8	Amino Acid Metabolism	Tryptophan metabolism	3332002	0.48286	1	0.745967	0.18217	0.841895	0.718968	0.19366	0.592677	0.621418	0.0976773	0.724831	0.493403	0.122748	0.44749	602522	1.26039e+06	679807	1.33187e+06	1.32942e+06	2.18273e+06	1.45234e+06	3.332e+06	2.22889e+06	1.58152e+06	1.60159e+06	1.46808e+06	1.52387e+06	1.79636e+06	1.64975e+06	508654	404579	244602	452651	352844	2.38595e+06	899651	2.17735e+06	1.80469e+06	1.80587e+06	1.51025e+06	1.51089e+06
p2781	175.063	8.51069	C10H9NO2	Indole-3-acetate	10	Amino Acid Metabolism	Tryptophan metabolism	3371864	23.5307	0	6.82926	53.634	0	13.6254	65.6574	0	4.34874	2486.44	13.7052	14.9252	1326.38	217.422	0	68050.7	0	0	49602.8	0	0	0	0	0	17205.5	0	0	0	16940.8	49761.5	50238.5	60356.2	39987.4	67826.5	0	0	0	0	0	15358.9	18302
p3897	212.059	8.23064	C12H8N2O2	Isophenoxazine	8	Amino Acid Metabolism	Tryptophan metabolism	181107	1.51375	1	1.30149	1.41314	1.46777	1.18916	1.66994	2.03306	2.36123	4.45899	2.08168	3.15239	3.60276	1.78836	29417.1	27215.3	61602.8	55195.1	61142.5	30488.7	23119.9	29658.8	33128.1	38565.5	47370.8	23820.1	27169.2	53356.6	49962.8	36069.5	51967.8	46712	47301	36930.5	36534.6	58581.3	44020.3	38692.9	49618.8	25951.9	35077.6
n3108	167.022	14.8637	C7H5NO4	Pyridine-2,3-dicarboxylate	10	Amino Acid Metabolism	Tryptophan metabolism__beta-Alanine metabolism__Nicotinate and nicotinamide metabolism	188441	1.44751	1	0.4739	0.323526	1.45285	0.628277	0.340914	0.535945	0.480385	0.394745	0.945966	0.41449	0.283307	0.664889	99820.9	168637	137534	105932	87375.2	148613	91190.7	61688.9	58772	53757.7	31734.4	31173.8	31271.6	46228.6	55796.9	23450.2	27238.7	32362.2	26301	24594.9	188441	130737	87666.9	88015.9	106653	66691.7	49730.1
p608	204.09	11.5965	C11H12N2O2	L-Tryptophan	8	Amino Acid Metabolism	Tryptophan metabolism__Phenylalanine, tyrosine and tryptophan biosynthesis__Indole and ipecac alkaloid biosynthesis	8428289	0.903355	1	1.40383	1.13209	1.15418	1.34174	1.09668	0.701447	0.97766	0.535051	0.845331	0.767654	0.507298	0.962686	3.61133e+06	4.14596e+06	5.98809e+06	4.50214e+06	4.50869e+06	4.83728e+06	5.10995e+06	4.69456e+06	5.86324e+06	4.68573e+06	8.42829e+06	6.28719e+06	6.35033e+06	7.84284e+06	6.45494e+06	6.97811e+06	4.58582e+06	4.70048e+06	6.11587e+06	6.13803e+06	4.92454e+06	7.55414e+06	4.87816e+06	5.96976e+06	5.74818e+06	7.95479e+06	6.02575e+06
n2431	168.042	10.5458	C8H8O4	3,4-Dihydroxyphenylacetate	8	Amino Acid Metabolism	Tyrosine metabolism	168501	1.20868	1	2.76563	7.33791	1.12866	2.30081	6.58016	0.844776	1.47541	2.26481	0.964836	1.13912	3.01549	2.8878	14658.5	15429.2	16391.8	22872.3	25081.5	15785.2	15161.4	15757.4	16600	14825.6	30604.7	40725.4	35472.8	63578.3	45696.3	73356.9	168501	124396	103236	103817	14257.1	26519.6	12509.3	16640.7	18254.6	32853.1	30548.4
n267	138.032	5.08062	C7H6O3	Gentisate aldehyde	6	Amino Acid Metabolism	Tyrosine metabolism	892426	1.03797	1	0.994303	0.643567	1.09944	0.770776	0.593386	1.45573	1.93708	1.14798	1.11254	2.8088	0.79077	1.12039	209046	127884	185313	222086	162165	149213	174048	243449	148150	158473	138320	269612	245056	124295	91075.4	110370	138544	104896	111308	96930.9	342004	163921	158554	140930	154772	114300	142383
p1454	209.069	15.8004	C10H11NO4	4-Hydroxyphenylacetylglycine	6	Amino Acid Metabolism	Tyrosine metabolism	134507	0	0	0	97.1569	0	0	115.384	0	0	0	0	0	3.34168	29.4468	0	0	0	0	0	0	0	0	0	0	0	0	0	0	0	77476.8	127362	104775	103841	72330.4	0	0	0	0	0	0	0
n3179	152.047	5.1482	C8H8O3	3,4-Dihydroxyphenylacetaldehyde	8	Amino Acid Metabolism	Tyrosine metabolism__Alkaloid biosynthesis I	165658	3.69377	1	3.1944	3.50779	4.14574	1.85956	4.94749	2.92668	3.17105	23.6426	4.73668	4.99931	15.8758	4.76402	39734.1	0	36644.4	26285.8	0	0	0	27793.9	0	0	20968.2	28956.5	26703	12157.3	0	21766.2	28472.4	30523.9	0	16732.6	25740	0	61314.2	28172.3	0	28086.1	23598.4
n2612	152.047	7.57342	C8H8O3	4-Hydroxyphenylacetate	8	Amino Acid Metabolism	Tyrosine metabolism__Phenylalanine metabolism	585695	1.42914	1	0.817369	1.16851	0.812371	0.612642	1.28708	1.06114	0.86416	1.80022	1.01404	1.19337	2.27753	1.36257	218647	224023	177059	171954	198912	88222	145199	196019	143961	119740	96790.5	50403.6	184266	137055	98037.9	154506	182555	158522	151962	162396	120607	64831.3	144088	105211	128350	106663	64862.9
p667	181.074	12.977	C9H11NO3	L-Tyrosine	10	Amino Acid Metabolism	Tyrosine metabolism__Phenylalanine, tyrosine and tryptophan biosynthesis__Novobiocin biosynthesis__Thiamine metabolism__Phenylpropanoid biosynthesis__Alkaloid biosynthesis I	59886449	0.709025	1	1.34802	0.928761	1.10878	1.29721	0.864369	0.653605	1.05042	0.300389	0.775885	0.684157	0.248732	0.822097	1.83483e+07	2.99816e+07	2.36634e+07	3.56624e+07	2.79587e+07	3.87545e+07	2.67307e+07	3.90439e+07	4.50953e+07	4.16445e+07	5.98864e+07	4.24948e+07	4.89744e+07	5.54096e+07	5.10697e+07	3.37606e+07	2.8601e+07	3.12208e+07	4.01616e+07	4.38991e+07	4.60452e+07	4.33581e+07	4.17509e+07	3.38262e+07	4.7095e+07	5.29852e+07	5.14349e+07
n2437	168.042	8.81669	C8H8O4	Homogentisate	10	Amino Acid Metabolism	Tyrosine metabolism__Styrene degradation	1002939	0.674114	1	0.706517	0.350254	1.00426	0.623533	0.371055	0.842444	0.767976	0.441277	0.937027	0.752841	0.24986	0.572608	561335	603808	314161	636397	549033	937792	648496	610807	1.00294e+06	752912	679723	576904	539325	487050	509820	236777	234647	180395	340152	392564	992896	589493	671282	856429	859696	506898	528669
n2880	292.106	9.54174	C14H16N2O5	(2S,4S)-Monatin	8	Amino Acid Metabolism	Undefined	242935	0.699904	1	1.18899	0.951709	1.16892	1.21341	0.891351	0.665532	0.887243	0.766535	0.729052	0.718555	0.762485	0.850471	98362.7	106918	129767	117341	109929	147996	156088	141713	208868	148756	215960	175601	174584	186801	202316	165606	102752	136876	178369	181021	166278	242935	147709	175403	206807	212481	182579
p1025	185.08	10.1294	C7H11N3O3	(S)-N-(4,5-Dihydro-1-methyl-4-oxo-1H-imidazol-2-yl)alanine	6	Amino Acid Metabolism	Undefined	223602	1.15525	1	1.43747	1.2419	1.17606	1.45219	1.22362	0.97283	1.15729	1.46348	0.990578	1.2142	1.41462	1.24644	112849	106967	152197	133572	101587	94910.9	77190.5	109853	134378	109242	145901	133653	135214	171697	169033	148193	113350	140572	113816	136780	90193.9	163720	101366	118415	144410	158401	165886
p2189	242.101	12.2444	C9H14N4O4	(S,S)-Np-Histidinylalanine	6	Amino Acid Metabolism	Undefined	714313	1.56861	1	0.896394	1.31361	1.42929	0.894788	1.24582	1.09741	0.719512	1.59255	1.26464	0.810849	1.43562	1.10013	354874	228494	666334	220017	236104	239330	233406	242818	188260	183660	181473	198524	208067	201895	184846	296154	157060	361397	314455	299455	215481	714313	183157	189849	251520	167888	210742
p2647	230.105	9.70557	C13H14N2O2	cyclic Melatonin	6	Amino Acid Metabolism	Undefined	995813	0.848792	1	1.37368	1.15776	1.18388	1.27063	1.23351	0.616081	0.924297	1.0978	0.755047	0.726697	1.19909	0.967999	353982	489703	573315	518777	494811	558590	583625	571825	612233	537313	987434	708624	631426	843824	762334	843066	454568	680135	679673	657912	553935	995813	569864	618381	652146	802615	655212
p2938	230.106	9.22795	C13H14N2O2	(1xi,3xi)-1,2,3,4-Tetrahydro-1-methyl-beta-carboline-3-carboxylic acid	8	Amino Acid Metabolism	Undefined	1215680	0.843045	1	1.21351	0.973316	1.08134	1.1506	0.982135	0.584782	0.876576	0.977883	0.69766	0.688204	1.04168	0.848591	520620	644347	869431	713894	725758	893366	808334	783540	889822	745774	1.21568e+06	937188	871053	1.03868e+06	938092	929777	644810	809844	821484	804962	845677	1.02243e+06	840579	876130	871210	1.04347e+06	921375
p3021	196.121	6.6759	C10H16N2O2	L-alpha-Amino-1H-pyrrole-1-hexanoic acid	8	Amino Acid Metabolism	Undefined	874115	1.14586	1	0.776596	0.751423	1.80479	0.745092	0.685764	1.27399	0.840031	2.80917	1.2973	0.964363	1.95039	0.701788	147903	204457	308260	159806	195791	150259	236640	198214	130790	170954	139654	137840	144567	165448	101221	106100	103305	255058	96078.2	105863	188830	874115	181207	170084	186355	118980	177506
p3322	292.106	11.633	C14H16N2O5	(2S,4S)-Monatin	6	Amino Acid Metabolism	Undefined	315131	0.743606	1	1.21638	1.03001	1.15809	1.18352	0.941998	0.687767	0.906166	0.933723	0.773819	0.773251	0.832673	0.906051	110437	140016	186275	161670	122148	191231	168736	180299	237302	191421	220276	200774	212895	286548	258163	197140	123750	174645	243744	258794	204704	271461	184237	222065	239708	228937	183162
p3324	336.165	18.14	C12H24N4O7	N2-Fructopyranosylarginine	8	Amino Acid Metabolism	Undefined	706912	0.871764	1	1.37613	1.14296	1.37739	1.17419	1.12111	0.64005	1.19107	1.06922	0.760411	0.854394	0.889337	0.959079	136557	188909	387317	265915	262289	180976	239346	278130	366555	358527	335150	335841	417316	417951	452710	325270	240128	271720	415589	374332	220617	368459	653956	373833	343902	272332	256076
p3404	308.158	18.4135	C12H24N2O7	1-[(5-Amino-5-carboxypentyl)amino]-1-deoxyfructose	6	Amino Acid Metabolism	Undefined	167251	0.870251	1	1.23282	1.0981	1.05475	1.13555	1.16067	0.732386	0.960823	0.986297	0.83566	0.855196	0.806882	0.961318	61803.6	72339.5	157942	93884.2	79281.6	87819.4	89514.4	116692	145683	94907.4	130938	121110	108303	155748	142989	129697	103838	115971	133411	104144	78722.8	142429	105577	113323	123834	104227	115548
p3472	145.074	5.41624	C6H11NO3	Methyl aminolevulinate	6	Amino Acid Metabolism	Undefined	304491	1.07185	1	0.659473	0.627438	0.778243	0.744988	0.588844	1.15798	0.918665	1.26634	1.02512	1.1907	0.942847	0.747723	139581	142653	188769	143966	154019	148225	155653	156205	115764	141590	97807.2	92341.2	99994.5	92080.3	90906.4	89932.5	94763.1	84564.6	93952.8	86934.1	119513	77857	136133	111198	113638	137290	83937.5
p3478	228.111	10.8511	C10H16N2O4	Prolylhydroxyproline	8	Amino Acid Metabolism	Undefined	350159	0.838007	1	1.23382	1.04921	1.24961	1.32692	1.02711	0.711001	1.03932	1.06668	0.782898	0.865063	0.88769	0.917988	127913	143787	234387	187572	176923	197187	168846	197815	256305	218719	250823	218641	224997	291077	296238	214403	144686	199912	262196	268800	253003	350159	200318	225310	269391	267987	278652
p432	191.091	16.088	C6H13N3O4	4-Hydroxycitrulline	8	Amino Acid Metabolism	Undefined	87211230	0.158024	1	48.8311	136.376	0.560948	37.1864	128.259	0.336347	9.67729	1.5508	0.487368	2.57892	43.0523	50.482	71672.2	26444.2	0	186604	125770	430975	231524	244474	1.16407e+06	526611	2.18722e+07	2.4139e+07	2.11257e+07	3.10383e+07	2.86711e+07	7.12716e+07	8.72112e+07	7.07193e+07	6.65038e+07	5.85521e+07	253496	189400	140379	444840	429035	1.89648e+07	1.97184e+07
p530	331.211	5.14022	C15H29N3O5	Marimastat	6	Amino Acid Metabolism	Undefined	2914985	1.36268	1	0.764411	0.915551	1.28347	0.804798	0.885664	1.33968	0.906574	1.45704	1.26669	1.05993	1.09027	0.864989	1.48732e+06	1.52271e+06	2.69331e+06	1.21956e+06	1.55982e+06	1.2488e+06	1.16748e+06	1.27619e+06	1.3258e+06	1.20677e+06	972537	975162	890689	958313	961787	1.10014e+06	826519	1.29253e+06	1.2377e+06	1.24246e+06	1.38514e+06	2.54292e+06	1.33744e+06	1.18287e+06	1.54126e+06	934056	1.04443e+06
p688	230.09	13.0508	C9H14N2O5	(2S,3'S)-alpha-Amino-2-carboxy-5-oxo-1-pyrrolidinebutanoic acid	6	Amino Acid Metabolism	Undefined	179232	0.784373	1	1.24074	0.93414	1.08726	1.2591	0.95909	0.807861	1.02826	0.754211	0.888115	0.85169	0.764836	0.940614	69934.7	113779	83012.2	97280.8	103996	131990	94330.1	128497	127532	114311	155114	112701	132180	179232	161070	105825	97537.3	90338	110051	153611	132333	163707	108461	116361	127859	116615	142722
n1645	146.058	13.0438	C6H10O4	(S)-2-Aceto-2-hydroxybutanoate	6	Amino Acid Metabolism	Valine, leucine and isoleucine biosynthesis	283697	1.25399	1	0.778807	0.738195	0.944188	0.8326	0.717745	1.26763	1.12995	1.16196	1.2052	1.29332	0.981474	0.882624	231555	245515	275296	219900	236413	201190	193625	209392	172795	186864	126531	178519	149880	155737	139998	117068	160986	141294	142776	149396	190155	151975	178260	202219	187460	162181	178875
n2922	134.058	8.90681	C5H10O4	(R)-2,3-Dihydroxy-3-methylbutanoate	8	Amino Acid Metabolism	Valine, leucine and isoleucine biosynthesis	223764	0.992688	1	2.08893	3.62209	1.0297	1.86376	3.41472	0.592279	1.51792	1.27353	0.817216	1.29784	1.68447	1.68045	33369	28721.7	27186.6	42852.6	39691.2	36141.3	24428.6	24608.2	51373.9	36534.6	50664.2	78017.2	63614.6	85660.7	83608.7	143899	223764	76168.1	97356.6	85746.6	34875.8	25302.6	28268.5	44356.8	45423	54722.6	57260.4
n3086	158.058	7.56356	C7H10O4	2-Isopropylmaleate	8	Amino Acid Metabolism	Valine, leucine and isoleucine biosynthesis	256433	1.14248	1	0.713576	0.527281	0.944557	0.783337	0.465044	1.37557	0.8736	0.827536	0.874948	1.06689	0.694221	0.950604	163160	130932	124060	120589	177359	123505	64585.5	144406	122091	172204	100087	117616	104191	48175.1	77195	43826.9	59314.8	69137	107996	50221.7	58685.1	68330.3	173243	146248	145535	112458	109757
p1251	146.058	13.9604	C6H10O4	(S)-2-Aceto-2-hydroxybutanoate	6	Amino Acid Metabolism	Valine, leucine and isoleucine biosynthesis	140876	1.20703	1	0.804165	0.587626	0.980458	0.923798	0.62205	1.16372	1.06959	1.12024	0.975784	1.26336	0.964823	0.788598	83787.3	103961	133178	68709.6	93463.8	72159.9	70873.8	67593.7	75793.2	113816	47819.9	96855.6	58068.8	78623.2	40489.1	78927.2	33282.3	36476.4	31945.6	54558.3	102655	45504.1	117175	72134.3	54947.4	63875.9	78055.8
n3025	132.042	14.1106	C5H8O4	(S)-2-Acetolactate	8	Amino Acid Metabolism	Valine, leucine and isoleucine biosynthesis__C5-Branched dibasic acid metabolism	247809	1.02305	1	1.63549	1.85898	1.10019	1.53311	2.29691	1.04128	1.09416	4.07138	1.05771	1.14571	3.33595	1.34354	47590.9	41205.8	53956.3	49673.8	45319	48003	45573	42014.5	46779.1	50020.2	60083.8	71940.7	67262.4	102118	78667.7	79979.5	127012	105110	61356.2	58549	44170.8	57134.4	49539.9	53317.6	51509.6	63581.6	72894.8
n1443	176.068	11.8326	C7H12O5	(2S)-2-Isopropylmalate	8	Amino Acid Metabolism	Valine, leucine and isoleucine biosynthesis__Pyruvate metabolism	5872652	0.939747	1	2.71157	99.469	1.02799	2.67349	99.4163	0.975424	1.50348	4.26892	1.00714	1.32086	81.2716	26.0474	34003.6	34836.5	33854.2	41519.7	40016.3	41517.1	37781.1	36559.9	38652.7	41531.7	66241.1	120996	86696.1	142966	114685	5.87147e+06	5.71355e+06	2.63529e+06	2.76284e+06	2.51699e+06	39244.1	54358.8	35791.7	34947.8	37187.2	55129.2	117490
p3033	103.063	12.0317	C4H9NO2	L-3-Amino-isobutanoate	8	Amino Acid Metabolism	Valine, leucine and isoleucine degradation	1507537	1.12203	1	0.797875	0.866263	0.918825	0.794991	0.838271	1.23749	0.941032	1.15893	1.19015	1.02933	1.08933	0.84301	1.04923e+06	1.1869e+06	1.13055e+06	881125	783855	1.08768e+06	859777	946920	701124	888940	716532	680579	707952	689913	783045	839995	900532	715384	683916	744874	960421	533387	969982	776917	879709	732276	829205
p3060	867.168	12.0223	C26H44N7O18P3S	(2S,3S)-3-Hydroxy-2-methylbutanoyl-CoA	8	Amino Acid Metabolism	Valine, leucine and isoleucine degradation	857018	0	0	163.785	497.852	27.3869	215.228	649.068	0	207.309	95.6069	0	180.948	236.602	266.897	0	0	0	0	0	0	0	0	0	0	144756	178265	105172	173766	216967	478279	458409	337928	594836	619808	0	41131.9	0	45108.6	50694.1	286378	180075
n660	130.063	7.57445	C6H10O3	(S)-3-Methyl-2-oxopentanoic acid	6	Amino Acid Metabolism	Valine, leucine and isoleucine degradation__Valine, leucine and isoleucine biosynthesis	1207838	1.64213	1	0.445587	0.463915	1.13287	0.477709	0.477426	0.924737	0.530771	0.70386	0.761841	0.640105	0.858883	0.835691	1.20784e+06	476868	753094	576512	427868	498633	720232	207470	315289	354547	269478	143304	161314	152519	207411	187705	184314	168090	257236	175099	470201	326476	871839	368933	337244	221494	220736
n989	130.063	4.99805	C6H10O3	4-Methyl-2-oxopentanoate	8	Amino Acid Metabolism	Valine, leucine and isoleucine degradation__Valine, leucine and isoleucine biosynthesis	25076478	0.59753	1	0.633763	0.0873665	1.0022	0.492138	0.0825681	0.681178	0.377782	0.893471	0.773594	0.412404	0.258868	0.433089	6.92943e+06	7.34491e+06	5.13726e+06	8.13182e+06	6.90082e+06	1.15175e+07	1.06104e+07	1.37387e+07	1.23317e+07	9.44608e+06	6.91152e+06	6.7831e+06	8.237e+06	7.292e+06	7.30927e+06	1.34378e+06	714241	1.03811e+06	984313	955739	1.24501e+07	1.33016e+07	1.07533e+07	1.12464e+07	1.002e+07	5.18401e+06	5.81209e+06
p309	131.095	10.8612	C6H13NO2	L-Leucine	10	Amino Acid Metabolism	Valine, leucine and isoleucine degradation__Valine, leucine and isoleucine biosynthesis	107378593	1.01207	1	1.33762	0.969206	1.19769	1.30948	0.950722	0.762313	1.02034	1.02652	0.918987	0.759452	0.717632	0.953075	5.86442e+07	5.30768e+07	9.88337e+07	6.57439e+07	5.64468e+07	7.36489e+07	6.17698e+07	6.12938e+07	6.8605e+07	6.34605e+07	9.50088e+07	9.10282e+07	8.33042e+07	9.02008e+07	8.02379e+07	6.63078e+07	5.07403e+07	6.26158e+07	6.80067e+07	7.0983e+07	6.97659e+07	1.07379e+08	6.73919e+07	7.47699e+07	7.44676e+07	9.55823e+07	7.95306e+07
p659	131.095	11.3284	C6H13NO2	L-Isoleucine	10	Amino Acid Metabolism	Valine, leucine and isoleucine degradation__Valine, leucine and isoleucine biosynthesis__Alkaloid biosynthesis II	61564500	0.819906	1	1.46111	0.854479	1.12191	1.49551	0.905796	0.695197	1.08758	0.985935	0.85783	0.823993	0.772239	1.0361	2.60328e+07	2.98818e+07	3.72625e+07	3.06246e+07	2.92318e+07	3.70186e+07	3.82359e+07	3.06494e+07	4.14109e+07	3.9333e+07	5.89831e+07	5.14123e+07	5.73665e+07	5.46134e+07	5.03378e+07	3.83948e+07	2.38509e+07	2.32265e+07	3.76324e+07	3.63818e+07	3.84623e+07	5.22219e+07	3.91139e+07	3.71678e+07	4.24367e+07	5.06172e+07	5.52128e+07
n1987	116.047	7.13855	C5H8O3	3-Methyl-2-oxobutanoic acid	6	Amino Acid Metabolism	Valine, leucine and isoleucine degradation__Valine, leucine and isoleucine biosynthesis__Pantothenate and CoA biosynthesis	1137171	0.495331	1	0.743899	0.176532	0.766118	0.591437	0.178613	0.677466	0.473705	1.68618	0.841933	0.518648	0.476494	0.42062	125005	147675	66036.1	157498	102172	229001	255595	276787	278601	168069	159729	149324	250647	168828	170143	46474.2	45863.8	36929.9	43616.9	40374.8	172044	209420	229313	212821	101914	127409	126268
n1527	117.079	12.533	C5H11NO2	L-Valine	10	Amino Acid Metabolism	Valine, leucine and isoleucine degradation__Valine, leucine and isoleucine biosynthesis__Penicillin and cephalosporin biosynthesis__Propanoate metabolism__Pantothenate and CoA biosynthesis	5242062	0.732378	1	1.59395	1.34901	1.16794	1.5645	1.29517	0.66966	1.12538	0.891478	0.836915	0.861248	0.857843	1.01279	2.03797e+06	2.17761e+06	2.03745e+06	2.5312e+06	2.41449e+06	3.19358e+06	2.8109e+06	2.57714e+06	3.79305e+06	2.91622e+06	5.11816e+06	4.32464e+06	4.45763e+06	5.23048e+06	5.24206e+06	4.45181e+06	3.66255e+06	3.5663e+06	4.59353e+06	4.35334e+06	3.47263e+06	4.44873e+06	2.94393e+06	3.34102e+06	3.65261e+06	4.85005e+06	4.30449e+06
n2391	529.087	14.4596	C16H25N3O13P2	dTDP-3-amino-2,3,6-trideoxy-D-threo-hexopyranos-4-ulose	6	Biosynthesis of Polyketides and Nonribosomal Peptides	Biosynthesis of vancomycin group antibiotics	233112	1.16135	1	0.923013	0.619936	0.852623	1.12981	0.648713	0.919769	1.25112	0.837888	0.941154	1.17107	1.28149	1.13439	139817	105691	198248	117792	128569	127580	125218	109230	113133	119078	135111	129221	111579	80976	91603.8	74895.4	82501.9	65298.4	72720.9	72973.9	93937	89874.3	93124.1	117972	111755	143023	133027
n2638	194.058	5.09742	C10H10O4	6-Hydroxymellein	6	Biosynthesis of Secondary Metabolites	6-methoxymellein biosynthesis	162054	1.03528	1	0.776902	0.733256	0.911797	0.759336	0.685867	1.37009	1.00802	1.10322	1.06649	1.14421	0.981581	0.823934	130061	72335.4	115043	97494.6	104782	96669.5	99159.5	100234	97148.6	108791	73860.4	82441.5	89164.7	69503.3	75037.7	74916.6	80003.2	53267.8	82725.7	77183.4	86670.4	78284.3	119333	86075	87362.7	79963.8	71766.8
p2917	155.095	13.5976	C8H13NO2	Retronecine	6	Biosynthesis of Secondary Metabolites	Alkaloid biosynthesis II	101358	1.02263	1	0.721758	2.12513	1.18883	0.711082	2.2083	1.11872	1.01169	1.3239	1.14715	1.10385	0.955625	0.931276	36340.2	32710.7	46906.6	30585.2	35454.5	35780.4	26323.8	28287.2	44063.6	43515.3	30869.6	28403	19705	22675	26798.9	62367	101358	76419.3	64143.1	73922	29204.9	48808.7	50611.2	25061.3	57890	21025.7	21646.6
p1430	228.122	14.797	C9H16N4O3	Deoxyguanidinoproclavaminic acid	6	Biosynthesis of Secondary Metabolites	Clavulanic acid biosynthesis	882609	0.933377	1	1.22582	1.06383	1.14112	1.32424	1.06106	0.661235	1.15469	0.974003	0.805232	0.821527	0.989612	1.08129	349057	417405	588878	510857	534675	448481	505843	531429	548017	538474	734828	586223	613446	643798	574803	548039	462297	527386	610105	588590	538177	681581	530002	593969	591517	647068	638829
p2218	202.095	12.7454	C8H14N2O4	Proclavaminic acid	6	Biosynthesis of Secondary Metabolites	Clavulanic acid biosynthesis	1592057	1.00156	1	0.727985	0.717413	1.13154	0.720713	0.711141	0.845212	0.58597	1.59443	0.9988	0.557893	0.869564	0.747536	802195	719757	1.06391e+06	620009	610334	767806	867121	819867	722591	632892	579139	551986	534154	476853	631692	648131	357017	511113	582999	634282	793002	1.20085e+06	907941	648426	761256	562485	514535
p2714	200.08	9.3435	C8H12N2O4	Dihydroclavaminic acid	8	Biosynthesis of Secondary Metabolites	Clavulanic acid biosynthesis	1812795	0.844606	1	1.37569	1.13191	1.12356	1.38313	1.09548	0.712871	1.06978	1.20793	0.823905	0.923015	1.01857	0.965433	612395	772739	1.19674e+06	856818	698354	972153	804968	864996	1.25808e+06	997996	1.51056e+06	1.193e+06	1.20429e+06	1.37233e+06	1.45824e+06	1.2208e+06	759571	978815	1.2492e+06	1.33591e+06	981929	1.66921e+06	849359	1.01537e+06	987544	1.3837e+06	1.2719e+06
p3748	200.08	12.6155	C8H12N2O4	Dihydroclavaminic acid	8	Biosynthesis of Secondary Metabolites	Clavulanic acid biosynthesis	174479	1.05617	1	1.54266	1.26677	1.41759	1.56524	1.12867	0.717853	1.12737	1.15288	0.810866	1.07059	0.986886	1.05799	93584.6	91643.9	80666.3	98326.1	83879.1	86616.2	62752.8	95242.6	91051.3	88604.4	174218	113006	110762	125861	130653	127592	64247.6	89344.3	128500	127765	114624	174479	121165	89398.4	101769	158193	116597
p375	246.133	14.1428	C9H18N4O4	L-N2-(2-Carboxyethyl)arginine	6	Biosynthesis of Secondary Metabolites	Clavulanic acid biosynthesis	244352	0.552542	1	1.30744	1.31438	1.04212	1.28566	1.30334	0.403817	0.71387	0.644157	0.548767	0.56783	0.589144	0.905838	52150.5	76682.3	92826.9	95407.5	77099.1	151503	123110	100156	212162	126437	158758	167601	171034	237885	197410	222932	137883	173447	182495	220884	110630	140991	148878	163834	179084	179705	149760
n2537	270.053	7.57981	C15H10O5	Apigenin	8	Biosynthesis of Secondary Metabolites	Flavonoid biosynthesis__Isoflavonoid biosynthesis	952358	1.06225	1	0.913937	0.94108	1.28457	0.950467	1.10243	1.01485	1.10119	2.50482	1.23477	1.27146	1.47486	1.06771	241811	497075	378979	361840	457340	315762	454067	433910	315739	304048	136088	347004	319297	408913	455286	399502	219929	283410	342893	470350	373906	480260	564738	422226	501318	349263	406024
p2732	416.111	7.6288	C21H20O9	Daidzin	8	Biosynthesis of Secondary Metabolites	Isoflavonoid biosynthesis	2663170	0.850763	1	0.703944	0.573061	1.07861	0.716838	0.628059	1.0676	0.877557	1.00183	0.891206	0.811026	0.776931	0.688564	994886	1.93763e+06	1.923e+06	1.30602e+06	2.24369e+06	1.8443e+06	2.41947e+06	2.15243e+06	1.6688e+06	1.79464e+06	802425	1.42298e+06	1.4246e+06	1.62549e+06	1.67921e+06	1.11415e+06	793018	931142	1.49069e+06	1.33263e+06	2.51167e+06	1.56561e+06	2.62837e+06	1.82748e+06	2.12317e+06	1.39748e+06	1.30133e+06
n1118	156.151	4.30444	C10H20O	(-)-Menthol	6	Biosynthesis of Secondary Metabolites	Monoterpenoid biosynthesis	4078722	0.0926782	1	1.82847	2.29587	1.68218	1.95813	2.84489	1.47044	2.51185	23.5386	2.26235	3.56617	19.0681	3.35336	0	0	0	61634.5	0	131121	232688	172869	66123	62236.7	195496	285477	227698	303669	203661	328573	429790	269832	282018	216628	239548	108984	243794	290183	236206	226207	233605
n1702	156.151	7.56816	C10H20O	(+)-Neomenthol	6	Biosynthesis of Secondary Metabolites	Monoterpenoid biosynthesis	2558622	0.221507	1	2.58762	3.187	2.53257	3.12385	3.62992	1.6546	3.4309	28.0505	3.43269	4.7244	23.9213	6.61421	38477.8	0	0	0	38705	77035.7	105561	108477	0	57370.6	178048	187308	184763	220021	131502	243123	374198	216975	162083	114114	217241	109479	240845	180050	134845	185574	202328
n2842	220.182	4.33159	C15H24O	2-trans,6-trans-Farnesal	8	Biosynthesis of Secondary Metabolites	Undefined	533628	1.53557	1	0.685811	0.569127	1.20767	0.826566	0.697422	0.883968	0.948907	2.16995	1.60061	1.37021	1.74932	0.92316	306756	230544	400213	153239	164306	243019	125972	230896	106106	111332	148870	89601.8	105154	95365.8	121540	75679	82815.1	69496.7	100834	136338	197206	178740	214506	220719	175890	162410	125531
n3019	621.061	17.2521	C17H25N3O18P2	UDP-N-acetyl-D-mannosaminouronate	8	Carbohydrate Metabolism	Aminosugars metabolism	180430	0.775933	1	2.22738	0.320596	0.770889	2.10534	0.297433	0.467802	0.853977	0.152318	0.551881	0.474405	1.11687	0.833443	46058.4	36587.7	43635.4	84340.4	50728.1	67977.9	49015.8	42061.4	113746	64019.3	122041	152364	121153	180430	174237	24774.4	23722.4	24651.9	16156.4	18678.1	56687	46260.9	39015.2	69221.6	48466.2	156027	151472
n3085	179.08	16.4698	C6H13NO5	D-Glucosamine	8	Carbohydrate Metabolism	Aminosugars metabolism	153207	1.03612	1	1.01806	7.92619	0.993138	1.1813	6.38459	1.08277	1.21058	1.75405	0.996895	1.54852	2.5499	3.10209	15264.5	11452.7	12931.9	12436.5	12921.7	15790.7	11563.1	12459.9	10566	12361.4	12535.6	14752.4	11770.4	13260.1	11556	66460	134872	115396	80629.9	99939.8	14331.5	14001.6	12906.7	10258.2	10812.4	13499.6	14979.3
n3124	309.106	13.0406	C11H19NO9	N-Acetylneuraminate	10	Carbohydrate Metabolism	Aminosugars metabolism	190463	1.49375	1	1.80912	1.87762	1.35044	1.33495	1.61081	0.51102	0.958471	1.9867	0.765779	0.894749	1.39927	1.26045	72526.6	34382.1	154463	39198	31776.5	36317.1	67645.4	45099.8	43688.4	29739.5	53838.1	97010.8	60696.8	99558.7	91407.8	73003.9	99242.8	83521.2	87859.4	74124	36953.9	124217	29913.3	68076.3	41297.6	58573.7	58251.5
n1671	607.081	14.7655	C17H27N3O17P2	UDP-N-acetyl-D-glucosamine	10	Carbohydrate Metabolism	Aminosugars metabolism__Lipopolysaccharide biosynthesis__Peptidoglycan biosynthesis	3918529	0.651989	1	0.671029	1.80946	0.632408	0.606473	1.74161	0.267092	0.223481	0.105147	0.329945	0.182775	0.74783	0.776896	509480	794769	732503	2.10346e+06	1.08576e+06	1.36014e+06	1.09246e+06	731924	3.44549e+06	1.38541e+06	1.05306e+06	938021	709423	1.38549e+06	1.29259e+06	2.68015e+06	3.91853e+06	2.68587e+06	2.95731e+06	2.26172e+06	1.02342e+06	809270	635307	1.42179e+06	1.17923e+06	781374	812654
n1938	210.038	16.5152	C6H10O8	D-Glucarate	8	Carbohydrate Metabolism	Ascorbate and aldarate metabolism	1612312	0.58302	1	2.61322	2.38221	1.39962	2.56256	2.20682	0.4218	0.978526	0.50861	0.525323	0.499448	0.765015	1.51427	211273	250719	466718	332069	220382	343435	447733	404916	897511	446904	1.15893e+06	1.31102e+06	1.06045e+06	1.49617e+06	1.61231e+06	1.35304e+06	793580	1.07979e+06	1.35148e+06	1.4741e+06	392434	1.41903e+06	443080	673602	627576	1.21571e+06	1.27999e+06
n2432	136.037	12.4538	C4H8O5	[FA trihydroxy(4:0)] 2,3,4-trihydroxy-butanoic acid	8	Carbohydrate Metabolism	Ascorbate and aldarate metabolism	1033891	1.59086	1	1.8174	1.90752	1.83622	1.73958	2.57935	1.24213	1.9937	2.93217	1.25388	1.85912	1.72455	1.87293	291000	239180	538997	248236	276175	174005	257295	209675	183865	176873	278599	411135	323140	442943	364701	380503	248402	458777	441027	382075	202427	843053	184308	358705	250867	305443	380644
n2932	130.027	10.2887	C5H6O4	2,5-Dioxopentanoate	8	Carbohydrate Metabolism	Ascorbate and aldarate metabolism__Arginine and proline metabolism	239767	1.17978	1	1.30075	0.782681	0.909056	1.39854	0.878345	0.765521	0.546965	0.451376	0.922543	0.466299	0.494442	0.655945	132763	152506	111559	166595	129441	150176	111198	116473	109716	99717.9	119951	160889	136735	159643	186686	125420	69954	84047.6	81024.9	99207.1	123826	92211.6	119729	90665.4	107438	154543	132831
n1950	190.084	10.3866	C8H14O5	(R)-3-((R)-3-Hydroxybutanoyloxy)butanoate	8	Carbohydrate Metabolism	Butanoate metabolism	2335752	1.03934	1	3.3311	51.9877	0.999513	2.98267	41.2145	0.947192	1.38412	1.15064	0.965479	1.00784	17.9026	8.44084	19297.6	21362.4	22745.2	21399.3	17840	19257.5	18886.4	15771.8	27043.2	17800.6	60171.5	70649.2	65639	76837.3	55681	2.33575e+06	695170	769609	685840	647905	20042.3	18312.2	16215.4	26635.7	17505.7	40171.2	53530
n2330	88.0523	7.58278	C4H8O2	Butanoic acid	8	Carbohydrate Metabolism	Butanoate metabolism	1308690	1.10331	1	0.360676	0.134527	0.449058	0.183452	0.109081	0.966603	0.303147	0.199433	0.454278	0.286722	0.212064	0.833924	1.20186e+06	871765	556289	1.02725e+06	606560	907858	904095	880409	580548	591568	677816	188615	209288	135524	182582	120085	97477	109240	118493	74582.2	491206	277811	454938	234576	276845	122125	136722
n3027	104.047	10.0615	C4H8O3	4-Hydroxybutanoic acid	8	Carbohydrate Metabolism	Butanoate metabolism	206139	0.809333	1	1.67096	1.54035	1.38401	1.53121	1.24055	0.905155	0.91538	1.63395	1.19671	0.875152	1.91696	1.0859	61522.1	62375.8	62142.4	59160.4	73679.6	65691.3	76408.6	83547.7	92405.8	75950.4	74849.7	138497	149514	153038	142468	155660	119262	96673.5	99328.4	135982	87995.7	157191	95631.1	101458	103028	88237.3	139184
p1703	84.0211	13.4831	C4H4O2	3-Butynoate	6	Carbohydrate Metabolism	Butanoate metabolism	309687	0.974664	1	1.55257	1.5079	1.25815	1.50932	1.12744	0.728275	1.00909	1.21816	0.960493	0.934364	1.16379	1.12754	77765.3	85987.7	227861	136958	123608	114174	125986	131757	144954	152261	216406	192213	178301	240277	211676	161158	284264	171525	238263	153773	119348	215056	153161	154333	199968	180446	215683
n3060	132.042	10.5005	C5H8O4	2-Acetolactate	8	Carbohydrate Metabolism	Butanoate metabolism__Pantothenate and CoA biosynthesis	153100	0.925186	1	5.06293	6.9645	1.04555	4.09718	6.71995	0.96425	3.77987	4.21169	1.088	3.5582	3.3051	3.45207	8138.32	8586.93	13001.8	13450.7	15597	12012.7	11767.8	12091.7	13969.7	13685.5	19527.7	76400.4	54244.1	83976.3	87486.4	69524.7	51918.2	37698.3	130196	153100	12427	12486.6	12915.8	13968.9	14623.2	33211.2	51958.9
p1268	177.064	14.968	C6H11NO5	4-Hydroxy-4-methylglutamate	6	Carbohydrate Metabolism	C5-Branched dibasic acid metabolism	218107	0.882136	1	1.88134	3.26548	1.1597	1.66876	3.46082	0.266702	1.15558	1.09627	0.701366	0.986143	1.30577	1.64008	25700.9	37201.6	71928.9	36169.7	43968.8	48383.8	45796.1	29465.2	66007.9	54039.4	108316	77115	76165.6	100047	96825.1	167117	146510	161092	166011	155042	48471.2	70599.2	48069.8	51442.1	64027	77648.4	74477.8
p214	161.069	17.1269	C6H11NO4	4-Methyl-L-glutamate	6	Carbohydrate Metabolism	C5-Branched dibasic acid metabolism	669516	0.954008	1	2.78904	4.20384	1.09643	2.45229	4.08359	0.849547	1.90715	1.13595	0.807296	1.33381	2.02736	2.35843	96034	126767	197206	134504	125134	134063	135267	141607	166139	135336	353158	391509	344927	510906	386446	616293	599382	641921	542740	594529	131511	161991	142865	180569	164175	320679	343240
p3608	177.064	13.0835	C6H11NO5	4-Hydroxy-4-methylglutamate	6	Carbohydrate Metabolism	C5-Branched dibasic acid metabolism	182722	1.08121	1	1.64604	1.72488	1.16003	1.52882	1.57688	0.85517	1.48872	1.49919	1.15964	1.38066	1.38556	1.45586	75239.7	72091.3	98882.9	76847.1	68828.1	82995.6	70087.1	71977.8	74121.4	63271.6	144482	131790	93986.2	131356	94999.6	108954	116724	132357	126585	140570	50020.3	182722	46845.4	68822.9	72047.3	99768.5	119212
p433	158.069	16.016	C6H10N2O3	4-Methylene-L-glutamine	6	Carbohydrate Metabolism	C5-Branched dibasic acid metabolism	13506897	1.47751	1	31.5312	89.811	0.761404	23.3405	83.8522	0.443013	6.34302	1.53527	1.7779	1.86977	27.0191	31.9687	151556	109480	125412	284474	200295	117093	99747.4	93029.9	177694	102087	3.2272e+06	3.65265e+06	2.98951e+06	4.48597e+06	4.23709e+06	1.09187e+07	1.35069e+07	1.07184e+07	9.2675e+06	8.54565e+06	94063.9	78708.9	67012.9	83459.9	125717	2.77562e+06	2.71726e+06
n2384	146.022	15.1303	C5H6O5	2-Oxoglutarate	10	Carbohydrate Metabolism	Citrate cycle (TCA cycle)__Ascorbate and aldarate metabolism__Glutamate metabolism__Alanine and aspartate metabolism__Lysine biosynthesis__Histidine metabolism__D-Glutamine and D-glutamate metabolism__Glyoxylate and dicarboxylate metabolism	1597453	1.11213	1	1.75067	2.13151	1.8667	1.28264	1.81793	0.698669	0.877557	5.54784	0.981835	0.958631	4.46182	2.23967	107254	74291.2	215270	107373	82706.7	103501	100760	75911.1	129500	118050	169136	138902	191962	233357	190510	172573	156315	216569	296083	283307	100487	581902	78572.1	107713	116422	127443	146630
n1431	255.705	5.13764	C21H36N7O16P3S	CoA	8	Carbohydrate Metabolism	Citrate cycle (TCA cycle)__Fatty acid metabolism__Pantothenate and CoA biosynthesis	6802159	0.815369	1	2.4252	0.723543	0.54515	1.91592	0.630621	0.646927	0.872988	0.134574	0.433306	0.418289	0.739561	0.646894	1.68817e+06	1.53928e+06	1.26988e+06	2.38645e+06	1.82294e+06	2.23298e+06	1.77485e+06	1.66822e+06	2.81055e+06	2.19166e+06	4.2711e+06	4.54901e+06	4.55575e+06	6.80216e+06	5.71894e+06	1.82677e+06	1.23665e+06	1.70121e+06	1.40768e+06	1.55386e+06	1.1425e+06	707893	1.06212e+06	1.57767e+06	1.33107e+06	4.15985e+06	4.00943e+06
p1797	767.115	13.3433	C21H36N7O16P3S	CoA	6	Carbohydrate Metabolism	Citrate cycle (TCA cycle)__Fatty acid metabolism__Pantothenate and CoA biosynthesis	5966832	1.14226	1	1.08347	2.86505	0.752782	0.965618	2.82399	0.590183	0.740679	0.354049	0.6348	0.576719	1.02902	1.35567	1.69207e+06	1.99919e+06	1.89217e+06	2.30979e+06	1.86329e+06	1.632e+06	1.26865e+06	1.39448e+06	2.42887e+06	1.81744e+06	1.55627e+06	1.79192e+06	1.44385e+06	2.36637e+06	2.096e+06	5.39189e+06	5.20554e+06	5.17303e+06	4.55879e+06	4.14242e+06	1.46267e+06	1.00001e+06	1.15215e+06	1.38661e+06	1.42839e+06	1.40805e+06	1.7893e+06
n1027	192.027	17.586	C6H8O7	Citrate	10	Carbohydrate Metabolism	Citrate cycle (TCA cycle)__Glutamate metabolism__Alanine and aspartate metabolism__Glyoxylate and dicarboxylate metabolism__Reductive carboxylate cycle (CO2 fixation)	13646679	0.998146	1	1.46831	2.01636	1.13415	1.24597	2.02124	0.671326	1.47086	1.52034	0.836021	1.04429	1.52656	1.48793	6.0942e+06	3.86455e+06	8.6446e+06	4.16897e+06	4.35672e+06	4.55057e+06	4.3089e+06	5.5227e+06	6.6721e+06	6.12516e+06	5.53895e+06	8.28543e+06	8.02024e+06	8.38488e+06	9.67835e+06	8.70792e+06	1.23655e+07	1.16401e+07	1.03099e+07	1.17801e+07	4.89919e+06	1.05995e+07	5.28223e+06	4.73139e+06	5.31329e+06	5.34312e+06	7.63967e+06
n820	134.022	15.5879	C4H6O5	(S)-Malate	10	Carbohydrate Metabolism	Citrate cycle (TCA cycle)__Glutamate metabolism__Alanine and aspartate metabolism__Pyruvate metabolism__Glyoxylate and dicarboxylate metabolism__Carbon fixation__Reductive carboxylate cycle (CO2 fixation)	20337501	0.921845	1	1.05617	1.76838	1.2252	1.10835	1.64007	0.752746	0.994272	1.25765	0.855528	0.984286	1.76748	1.34976	8.81855e+06	7.45638e+06	1.07485e+07	7.12255e+06	8.01543e+06	7.20095e+06	9.85714e+06	1.0159e+07	9.24088e+06	9.27791e+06	7.69651e+06	1.06683e+07	9.07122e+06	1.02977e+07	1.05712e+07	1.78265e+07	1.282e+07	1.33238e+07	1.83277e+07	1.85807e+07	9.35434e+06	1.69456e+07	1.03431e+07	9.61602e+06	9.77629e+06	9.46712e+06	1.14517e+07
n2156	174.016	17.3087	C6H6O6	cis-Aconitate	6	Carbohydrate Metabolism	Citrate cycle (TCA cycle)__Glyoxylate and dicarboxylate metabolism__C5-Branched dibasic acid metabolism__Reductive carboxylate cycle (CO2 fixation)	465915	1.13841	1	0.925777	0.833798	1.11637	0.938287	0.857284	1.31506	1.36623	1.57082	1.1219	1.29945	1.06751	1.19843	273659	174920	331326	159956	173452	167829	200932	184052	198752	226387	145674	166186	175791	207100	210613	97566.6	178496	207092	159777	172482	179794	383216	165193	190585	172967	185727	209517
n2130	166.048	12.7817	C5H10O6	D-Arabinonate	8	Carbohydrate Metabolism	D-arabinose degradation III	1846346	1.03928	1	0.867565	1.03139	1.13799	0.842875	0.976193	0.627524	0.76705	2.73608	0.947802	0.630512	2.77032	1.05115	519079	469258	343294	589255	520532	522364	422092	459687	461256	483753	376904	348055	396325	461907	454852	463196	448801	509120	489602	512172	680650	556880	532168	373944	529677	354776	399041
n1941	260.03	16.5481	C6H13O9P	D-Mannose 6-phosphate	8	Carbohydrate Metabolism	Fructose and mannose metabolism	492755	1.13012	1	1.04281	1.91272	0.837287	1.04306	1.70507	0.560785	0.521087	0.583365	0.571451	0.473777	1.71037	1.00504	55364.6	162853	131232	154026	153834	98249.1	89253	83305.2	195532	115290	90931.8	112876	101022	163416	138285	186297	155270	321578	220362	228985	86149.6	102620	81420	114622	102179	93201	122853
n2281	162.053	13.4508	C6H10O5	2-Dehydro-3-deoxy-L-rhamnonate	8	Carbohydrate Metabolism	Fructose and mannose metabolism	1143299	0.921388	1	1.50964	6.49937	1.14243	1.53912	6.19195	1.0132	1.19027	1.09973	1.01514	1.09846	2.92562	2.03213	92754.3	99401.3	128027	103315	128494	105703	117848	105073	134186	136278	162507	170074	199210	184106	188508	1.09443e+06	663964	692066	853166	590062	116968	158978	127808	129818	150841	167891	200114
n2485	182.079	13.9006	C6H14O6	Mannitol	10	Carbohydrate Metabolism	Fructose and mannose metabolism	1104581	1.12489	1	0.653466	0.479497	2.27187	0.659622	0.450781	1.0236	1.17175	0.820521	0.842797	0.975731	0.66946	0.970181	143869	198929	109833	108795	184392	90066.6	84752.6	203128	93083.8	191984	87350.5	95125.8	87175.3	81691	81915	62114.6	61009.3	65265.6	50320.6	79203.7	108441	74796.7	1.10458e+06	99481.4	118987	87714.1	82464.9
n2358	180.063	13.2444	C6H12O6	D-Mannose	8	Carbohydrate Metabolism	Fructose and mannose metabolism__Galactose metabolism	1004011	1.09163	1	1.65079	1.41639	1.35934	1.61693	1.43103	0.828428	1.17173	1.00841	0.957665	0.955959	1.01361	1.08277	296400	269860	918321	335773	381998	411060	371166	333974	468554	432729	706513	764349	577786	580532	701269	583355	500894	548489	562302	662494	384992	1.00401e+06	379066	450588	523788	747797	643862
n2963	178.048	12.5144	C6H10O6	2-Dehydro-3-deoxy-D-galactonate	8	Carbohydrate Metabolism	Galactose metabolism	247337	0.286976	1	0.879293	0.803918	0.920665	0.774836	0.748228	0.445574	0.356024	0.353859	0.526364	0.267022	0.670822	0.643	42666.9	44052.4	43071.4	60646.3	47070.8	215139	97248.7	94180.4	247337	173718	159410	167368	112708	137359	150879	119757	169971	125097	122279	128237	180870	123618	106118	166561	184796	111391	115338
n3033	178.048	15.1292	C6H10O6	D-Galactono-1,4-lactone	8	Carbohydrate Metabolism	Galactose metabolism	164309	0.911421	1	3.47881	3.85892	1.00756	2.88712	4.20506	0.978736	1.35063	0.859426	0.96434	1.07164	1.13372	1.70982	26371.7	26217.2	26219.4	25869.1	33190.5	30097.3	28880.4	31824.2	27783.6	32681.5	43601.9	115244	91031.3	135372	140979	110939	86456.7	69968.4	153106	163257	29451.5	36726.9	32886.6	27210.9	26134.6	49563.6	80034.9
n46	342.116	15.9409	C12H22O11	Lactose	10	Carbohydrate Metabolism	Galactose metabolism	100023016	0.192443	1	30.2772	35.157	0.787085	24.2953	34.4292	0.613597	10.7095	0.548316	0.705794	5.60971	7.1255	14.2721	352235	308646	371408	734641	579669	2.11023e+06	1.17546e+06	1.6994e+06	4.41652e+06	2.79216e+06	6.04968e+07	7.69981e+07	6.38953e+07	8.91713e+07	7.86316e+07	8.71912e+07	9.5929e+07	9.21274e+07	7.67594e+07	7.66891e+07	1.62779e+06	1.16514e+06	1.31968e+06	3.05295e+06	2.43198e+06	5.83537e+07	5.96202e+07
n3158	92.0472	10.3453	C3H8O3	Glycerol	10	Carbohydrate Metabolism	Galactose metabolism__Glycerolipid metabolism	170034	1.02533	1	0.54655	0.264862	0.820193	0.493717	0.245079	1.33621	0.859931	0.602277	0.995249	0.876589	0.389875	0.685715	130782	131524	109807	89415.9	91797.3	119139	124562	101092	88015.7	106847	44590	48687.9	76392.6	67576.6	57701.4	31904.8	25416.9	31190.4	26816.5	27605.9	93870.5	107324	100081	67325.1	74021.3	55152	62015.5
p3565	424.037	14.5284	C12H18N4O7P2S	Thiamin diphosphate	10	Carbohydrate Metabolism	Glycolysis / Gluconeogenesis__Citrate cycle (TCA cycle)__Alanine and aspartate metabolism__Valine, leucine and isoleucine degradation__Butanoate metabolism__Thiamine metabolism	419417	1.24037	1	0.908411	0.91905	0.881488	0.953712	1.05907	1.10338	0.981675	1.0238	1.03783	1.11852	0.903229	0.6856	306427	342918	332479	331177	268994	282888	207544	217255	263920	303813	218494	236597	192603	263838	247073	233090	265090	243761	209531	220703	270025	115124	245458	246251	247411	265016	222669
p2973	809.125	12.1437	C23H38N7O17P3S	Acetyl-CoA	6	Carbohydrate Metabolism	Glycolysis / Gluconeogenesis__Citrate cycle (TCA cycle)__Inositol metabolism__Fatty acid biosynthesis__Fatty acid elongation in mitochondria__Fatty acid metabolism__Alanine and aspartate metabolism__Valine, leucine and isoleucine degradation	482863	0.803846	1	2.08426	2.87627	0.491753	1.80288	2.80534	0.664144	1.93157	0.213692	0.37667	1.14061	1.47675	1.68487	92952.9	92876.2	74710.2	161856	97053.6	127045	134360	97263.6	189373	98161.9	220718	255780	246850	322879	300633	411659	482863	332092	365983	266063	70591	40240.7	50682.3	77471.7	78787	220302	257759
n2471	167.982	17.1165	C3H5O6P	Phosphoenolpyruvate	10	Carbohydrate Metabolism	Glycolysis / Gluconeogenesis__Citrate cycle (TCA cycle)__Phenylalanine, tyrosine and tryptophan biosynthesis__Aminophosphonate metabolism__Pyruvate metabolism__Carbon fixation__Reductive carboxylate cycle (CO2 fixation)	859320	0.663707	1	0.18824	0.185261	1.47162	0.242928	0.166003	0.587633	0.223936	0.279223	0.925658	0.439317	0.257808	0.183474	276579	447019	307769	327723	289975	344938	431136	615664	542917	549972	85780.9	79496.5	63427.8	119786	119215	80512.5	63561.4	124608	93814	97808.3	628654	732465	669959	766021	859320	107426	96558.7
n1937	185.993	16.5234	C3H7O7P	3-Phospho-D-glycerate	10	Carbohydrate Metabolism	Glycolysis / Gluconeogenesis__Glycine, serine and threonine metabolism__Glycerolipid metabolism__Glyoxylate and dicarboxylate metabolism__Carbon fixation	2298792	0.457849	1	1.94822	2.57928	1.44737	2.00333	2.59096	0.497395	0.739818	0.233895	0.657779	0.597625	0.69754	1.28574	243843	455083	334723	446713	280965	425416	684200	866752	1.16085e+06	709742	896998	1.31098e+06	1.10974e+06	2.09599e+06	2.08103e+06	2.09561e+06	1.66246e+06	2.29879e+06	1.92756e+06	1.93798e+06	792900	1.24506e+06	926883	1.31092e+06	1.29222e+06	1.2444e+06	1.37686e+06
n3035	169.998	15.0625	C3H7O6P	Glycerone phosphate	10	Carbohydrate Metabolism	Glycolysis / Gluconeogenesis__Inositol metabolism__Pentose and glucuronate interconversions__Fructose and mannose metabolism__Galactose metabolism__Glycerolipid metabolism__Glycerophospholipid metabolism__Pyruvate metabolism__Carbon fixation	163956	0.632211	1	1.13953	1.32376	1.45362	1.48981	1.3634	0.792897	1.35466	0.303472	0.911355	1.02653	0.789111	1.21852	39218.7	56357.7	43993.6	55750.6	50624	51822.4	68670.7	81858.9	100904	85766.9	43021.8	94281.9	88396.7	96585	121017	95664.8	77095.3	73603.9	130693	137916	68124.1	163764	93552.9	115614	124439	86127.3	107798
n1717	180.063	12.7933	C6H12O6	D-Glucose	8	Carbohydrate Metabolism	Glycolysis / Gluconeogenesis__Pentose phosphate pathway__Galactose metabolism__Starch and sucrose metabolism__Streptomycin biosynthesis__Indole and ipecac alkaloid biosynthesis	3663873	0.803587	1	2.02275	1.98943	1.47633	1.98717	1.82511	0.722557	1.39999	1.09763	1.00545	1.03799	1.07368	1.33631	878383	1.1313e+06	1.14905e+06	1.12952e+06	1.0907e+06	1.17581e+06	1.27108e+06	1.31331e+06	1.63776e+06	1.2957e+06	2.62548e+06	2.59636e+06	2.84935e+06	2.79572e+06	2.67274e+06	3.05604e+06	1.90485e+06	2.64064e+06	2.90346e+06	2.81159e+06	1.54055e+06	3.66387e+06	1.49127e+06	1.42996e+06	1.75641e+06	2.67183e+06	2.62643e+06
p3433	180.063	9.61894	C6H12O6	D-Glucose	6	Carbohydrate Metabolism	Glycolysis / Gluconeogenesis__Pentose phosphate pathway__Galactose metabolism__Starch and sucrose metabolism__Streptomycin biosynthesis__Indole and ipecac alkaloid biosynthesis	331909	1.03846	1	0.312246	0.0744534	0.816124	0.246206	0.0683398	0.600683	0.392109	0.460452	0.784075	0.36775	0.262093	0.374733	194055	208427	202449	318893	324855	251389	205629	260274	188814	296329	67204.7	46826.4	111798	54666.3	94960	0	0	36273.9	17034.6	36217	331909	98758.2	179103	154825	216742	36555	54777
n2241	90.0317	15.8167	C3H6O3	(S)-Lactate	6	Carbohydrate Metabolism	Glycolysis / Gluconeogenesis__Pyruvate metabolism__Propanoate metabolism__Styrene degradation	287049	0.897307	1	4.86614	5.88621	0.924714	4.15341	5.37846	1.0658	2.17537	1.16085	1.05692	1.4775	1.63584	2.66105	39979.1	37358.1	45845.3	36397.3	41919.6	37239.3	49035.5	49757.5	38306.5	50221.3	187176	210172	184909	265691	244793	279381	286495	287049	232284	236598	40092	45514.7	38325.1	41184.1	42538	202947	172260
n2157	89.9952	17.3333	C2H2O4	Oxalate	8	Carbohydrate Metabolism	Glyoxylate and dicarboxylate metabolism	465302	1.13194	1	0.623413	0.403708	0.945896	0.662474	0.413265	1.31379	0.786697	1.11322	1.16073	1.01328	0.781687	0.622862	370099	358479	351851	290249	314816	342569	320662	310556	227912	287339	213667	187065	216244	142831	168477	120563	126072	111701	118477	124324	271216	267761	364718	273685	231095	222457	221395
n2905	162.053	15.7779	C6H10O5	3-Ethylmalate	8	Carbohydrate Metabolism	Glyoxylate and dicarboxylate metabolism	225081	0.835227	1	0.992165	0.717501	1.14936	0.922048	0.694884	0.781662	0.812007	1.00325	0.843329	0.774617	0.765384	0.716982	119965	141814	148363	133275	138711	159957	165041	164282	172373	155045	174317	141906	170646	161696	161733	133873	88794.3	109256	129290	124768	167596	225081	167655	186705	191642	149346	141521
n2800	194.079	13.2782	C7H14O6	1-O-Methyl-myo-inositol	6	Carbohydrate Metabolism	Inositol phosphate metabolism	248441	0.725057	1	1.29347	0.980752	1.33306	1.22839	0.928369	0.798403	1.02152	0.700091	0.883807	0.806068	0.697998	0.884637	69408.5	107490	52489.2	111450	108550	127311	80138.2	131496	147566	133287	166769	128472	173288	154483	178676	126836	87519.9	106813	141956	144742	127758	146765	248441	132251	171012	148548	142823
n1463	166.048	13.3542	C5H10O6	D-Xylonate	6	Carbohydrate Metabolism	Pentose and glucuronate interconversions	1167485	1.10004	1	1.76636	1.84648	1.66177	1.69852	1.70017	0.876933	1.28034	3.14424	0.950788	1.03128	1.13753	1.37832	140669	143637	246114	142270	167166	140386	126328	157842	166325	172594	266191	236802	247057	300221	298299	295234	221927	253252	324240	315086	143596	361526	415879	161856	185865	244801	260932
n2772	148.037	9.76066	C5H8O5	D-Xylonolactone	8	Carbohydrate Metabolism	Pentose and glucuronate interconversions	516230	1.16448	1	0.331282	0.142191	0.88252	0.311073	0.145972	0.745864	0.414694	0.422072	0.908264	0.376454	0.253015	0.430774	485816	509620	360597	516230	401445	506676	359500	376688	374525	335158	93388.5	115161	176442	123268	138584	46165.7	49823.4	59196.4	64101.5	58347	423919	227513	403569	293680	374481	112753	133860
n2741	150.053	12.4282	C5H10O5	L-Arabinose	8	Carbohydrate Metabolism	Pentose and glucuronate interconversions__Ascorbate and aldarate metabolism__Nucleotide sugars metabolism	333772	1.38473	1	1.38647	4.74641	1.53686	2.31789	4.3519	1.04477	1.27635	1.87546	1.06242	1.22921	2.46803	2.23296	82554.2	58473.4	79495.4	82127.4	76520.7	62144.4	52456.2	52022.4	53548.3	53652.7	76331.8	94615.6	68975.9	72510.9	67215	239395	225256	333772	268766	232491	73174.7	144356	65643.9	63867.6	73787.9	155646	118369
n2441	566.055	15.9417	C15H24N2O17P2	UDP-glucose	6	Carbohydrate Metabolism	Pentose and glucuronate interconversions__Galactose metabolism__Ascorbate and aldarate metabolism__Pyrimidine metabolism__Starch and sucrose metabolism__Nucleotide sugars metabolism__Glycerolipid metabolism__Zeatin biosynthesis__Biosynthesis of ansamycins	715465	1.31374	1	2.25068	2.83815	0.561406	1.88114	3.02118	0.205922	0.463847	0.477753	0.293996	0.325051	2.58762	1.62258	44060.2	164048	108869	212081	82154.6	52999.9	50809.7	49604.7	238901	72930.4	246595	202462	153314	240315	204433	190971	517322	223482	213581	175083	33931.2	49490.9	25137.8	79044.1	73587.8	117512	138462
n2046	150.053	11.9721	C5H10O5	D-Xylose	6	Carbohydrate Metabolism	Pentose and glucuronate interconversions__Starch and sucrose metabolism__Nucleotide sugars metabolism	333772	1.18878	1	1.97932	3.94068	1.45664	2.09713	3.61315	0.863282	1.42969	1.55709	1.02258	1.10842	1.17727	1.51696	82554.2	71375.2	79495.4	82127.4	76520.7	62144.4	64578.3	64376.4	70065.9	68646	112181	104990	127275	164208	144147	239395	225256	333772	268766	232491	77047.7	155465	85364.7	68148.8	94391.2	155646	118369
n1137	214.024	13.5748	C5H11O7P	2-Deoxy-D-ribose 5-phosphate	6	Carbohydrate Metabolism	Pentose phosphate pathway	587100	0.661517	1	2.44758	5.10377	0.906164	2.09917	5.00896	0.66491	1.35145	0.668872	0.764087	1.14083	2.17951	2.05651	45084.6	57220.3	57740.1	66471.1	53278.7	65791	64398	67796.4	123617	101357	188171	199204	166616	263281	217954	445704	587100	431078	377496	317310	64606.6	79596.7	63625.6	77057.2	98384.4	136777	188260
n2925	258.014	11.9389	C6H11O9P	D-Glucono-1,5-lactone-6P	8	Carbohydrate Metabolism	Pentose phosphate pathway	247337	0.411604	1	0.986357	0.820381	0.971539	1.09785	0.789159	0.470045	0.43078	0.445184	0.526364	0.359329	0.676972	0.643	56835.7	59113.3	109440	60646.3	54617.3	215139	97248.7	94180.4	247337	173718	126316	177635	134729	180908	196743	133382	169971	125097	122279	128237	180870	165723	106118	166561	184796	156121	132562
n2954	276.025	17.2562	C6H13O10P	6-Phospho-D-gluconate	10	Carbohydrate Metabolism	Pentose phosphate pathway	197598	0.583129	1	2.28225	1.3209	2.49925	2.75207	1.31848	0.429382	3.01736	0.202376	0.945123	1.00889	0.988056	1.79623	5946.35	11796.3	20176.7	19067.3	25960.5	6875.49	23672.1	22907.9	44118.1	44671.2	41607	69570.4	45642.4	70283.8	97533.9	22438.9	23021.8	28368.4	58653.1	55408.2	20959.1	197598	30744.3	49845.2	56359.2	61748.7	91076
n505	196.058	13.7755	C6H12O7	D-Gluconic acid	10	Carbohydrate Metabolism	Pentose phosphate pathway	37079191	2.75443	1	3.9349	6.98362	3.27064	4.52467	6.59874	1.66291	5.24696	10.0787	1.99585	4.42693	6.16972	4.98501	5.08379e+06	3.37351e+06	2.00642e+07	2.9893e+06	6.09071e+06	1.42469e+06	4.37145e+06	3.09758e+06	1.7078e+06	3.04975e+06	8.93957e+06	8.99159e+06	8.96931e+06	1.30155e+07	1.38004e+07	1.6915e+07	1.07818e+07	2.28218e+07	2.27085e+07	2.2108e+07	2.1859e+06	2.94976e+07	4.47375e+06	4.15907e+06	4.33209e+06	1.09314e+07	1.20968e+07
n963	150.053	11.1785	C5H10O5	D-Ribose	6	Carbohydrate Metabolism	Pentose phosphate pathway	527977	0.855419	1	2.00044	4.78441	1.1774	1.83222	4.44056	0.686526	1.08952	1.12874	0.8141	0.802831	1.52107	1.89113	82554.2	71375.2	79499.5	82425.2	76520.7	80925.7	71744.9	81862	129790	94370.9	170008	160750	156800	217201	212832	527977	447090	380587	418278	420645	86612.1	155674	77112.8	99611.1	121057	162305	154775
p1242	178.048	13.7795	C6H10O6	D-Glucono-1,5-lactone	6	Carbohydrate Metabolism	Pentose phosphate pathway	2543165	3.18312	1	3.68469	6.83866	4.30305	4.23653	5.75165	1.81565	5.83218	13.6172	2.03029	4.97085	7.60976	5.26719	217518	125733	1.07188e+06	117600	216961	47987.8	122050	164640	74264.8	140735	342849	347862	361219	471157	502303	554541	412748	1.14185e+06	868285	781632	71393.5	1.80951e+06	185604	151970	146812	357237	439206
p3721	195.074	16.9341	C6H13NO6	2-Amino-2-deoxy-D-gluconate	10	Carbohydrate Metabolism	Pentose phosphate pathway__Aminosugars metabolism	233115	1.14114	1	0.212632	0.465291	1.26202	0.297488	0.435864	0.855385	0.686359	1.43951	0.989343	0.664521	0.768251	0.500902	70508.1	108818	167996	98557.5	84569.4	79244	99556.5	116728	77174.2	92137.1	12415.5	16884.1	24772.6	21041.2	23726.4	45107.8	20238.6	40318.3	58003.7	52617.3	96461.3	191803	108016	89939	100419	26576	22489.2
n2128	290.04	15.9596	C7H15O10P	D-Sedoheptulose 7-phosphate	8	Carbohydrate Metabolism	Pentose phosphate pathway__Carbon fixation	1774533	1.45045	1	0.578985	0.505775	0.804477	0.555971	0.51191	0.418145	0.327739	0.260647	0.623057	0.22963	0.709721	0.496641	974225	1.32011e+06	1.21266e+06	1.77453e+06	1.09483e+06	832140	693575	675861	1.3408e+06	853740	544341	449905	409956	561511	579575	427933	621788	513859	357334	302533	713118	540778	618518	796887	867276	413078	424090
n2926	178.048	11.4416	C6H10O6	2-Dehydro-3-deoxy-D-gluconate	8	Carbohydrate Metabolism	Pentose phosphate pathway__Pentose and glucuronate interconversions	240962	1.06627	1	2.58545	1.51159	1.47868	2.64735	1.39591	0.877767	1.08724	1.15505	1.05178	0.90861	1.04912	1.3274	56835.7	59113.3	109440	60120.1	54617.3	60401.6	61742.5	57120.1	79465.9	60256.4	126316	177635	143121	180908	196743	133382	64843.9	81165.1	95199.6	107586	58396.3	165723	78856.1	85797.4	82906.7	156121	132562
n3156	230.019	15.4579	C5H11O8P	D-Ribose 5-phosphate	10	Carbohydrate Metabolism	Pentose phosphate pathway__Purine metabolism__Carbon fixation	120484	1.01718	1	0.767518	0.69125	1.1572	0.880011	0.75312	0.745615	0.731513	0.422856	0.84418	0.687263	0.725134	0.802242	77261.1	87757.2	92351.5	102000	95407.7	65583.6	86670	78796	117001	99046	55435.9	62455.5	60812.5	81245.6	83205.2	71512.7	51469.7	54947.5	67630.4	63495.3	103058	108094	81383.5	104361	120484	70259.6	76411.1
n2775	214.024	11.1682	C5H11O7P	2-Deoxy-D-ribose 1-phosphate	8	Carbohydrate Metabolism	Pentose phosphate pathway__Pyrimidine metabolism	379300	1.30135	1	7.29958	3.72454	2.06782	7.84797	4.19756	1.04773	1.76054	1.37016	1.23855	1.1988	1.52757	2.71424	33551.5	28304.3	80777.3	35517.4	41641.7	29507.6	41702.6	26519.6	38754.7	32410.7	228859	209030	197488	282024	315463	192217	77238.1	104854	129042	125707	28784.3	177625	37450.6	54200.3	51185.3	243434	208009
n194	206.043	16.9612	C7H10O7	2-Methylcitrate	6	Carbohydrate Metabolism	Propanoate metabolism	4017745	0.507989	1	1.99001	6.55137	1.30668	2.04585	7.43996	0.418047	1.06198	0.74724	0.559889	0.855576	2.33199	2.59248	161707	182566	208217	256556	187871	333042	318838	267910	575600	467086	643240	906172	733033	810680	812228	2.47967e+06	2.45094e+06	2.6114e+06	2.4949e+06	2.82e+06	460159	883721	353729	382603	484124	795194	768524
n768	154.003	12.5906	C3H7O5P	Propanoyl phosphate	6	Carbohydrate Metabolism	Propanoate metabolism__C5-Branched dibasic acid metabolism	305009	1.3176	1	0.250741	0	0.667505	0.165182	0	1.25024	0.373699	0.166021	0.776267	0.339791	0.0308667	0.475817	195491	193966	305009	155672	191881	129717	189955	136514	178626	156033	22585.9	38835.8	36086.2	58244.7	42544.5	0	0	0	0	0	124594	100616	104110	86808.7	111764	25344.5	30489.6
n2297	162.053	14.5016	C6H10O5	(R)-2-Ethylmalate	6	Carbohydrate Metabolism	Pyruvate metabolism	153333	1.02454	1	1.11244	1.16382	0.965514	1.1088	1.11813	1.18951	1.16828	1.20517	1.10342	1.17029	1.96021	1.10556	66141.2	64332.5	65925.5	60544	62593.8	63642.1	62451.3	60853	60765.3	64172.6	69928.3	65567	66351	73073.3	72033.9	80846.1	68862.8	63853.9	65949.7	83466.1	64475.5	58517.2	68700.1	54360.5	55075.2	67984.2	75653.3
n2929	90.0316	13.4762	C3H6O3	(R)-Lactate	6	Carbohydrate Metabolism	Pyruvate metabolism	177218	0.922535	1	1.2674	0.864553	1.16079	1.24739	0.900346	0.926327	1.06946	1.04928	1.05382	0.917918	1.06236	0.971184	119955	108179	112078	114690	128952	107044	117758	123644	144195	140237	160672	149908	155759	163470	172301	111576	97029	97711.8	121998	118844	134865	177218	123490	137367	161699	153255	150892
p1449	379.105	15.7998	C13H21N3O8S	(R)-S-Lactoylglutathione	6	Carbohydrate Metabolism	Pyruvate metabolism	254495	0	0	53.8847	151.957	0	78.3672	143.756	0	4.72134	0	0	0	4.49035	47.163	0	0	0	0	0	0	0	0	0	0	0	113572	0	46836.1	109016	129452	254495	119218	139802	116815	0	0	0	0	0	63491.1	67752.8
n1306	422.083	15.3623	C12H23O14P	alpha,alpha'-Trehalose 6-phosphate	6	Carbohydrate Metabolism	Starch and sucrose metabolism	367333	0	0	114.29	274.434	0	83.7667	276.098	0	39.3012	0	0	16.5316	28.0523	80.4727	0	0	0	0	0	0	0	0	0	0	95911.3	116291	92689	140341	126215	302516	285276	276675	280513	227187	0	0	0	0	0	76851.7	85654.2
n2319	260.03	15.7037	C6H13O9P	D-Glucose 6-phosphate	10	Carbohydrate Metabolism	Starch and sucrose metabolism__Streptomycin biosynthesis__Inositol phosphate metabolism	1178639	1.31639	1	1.11505	2.07541	1.2036	1.15038	2.0938	0.607908	0.859615	1.22179	0.976486	0.723859	2.65541	1.52787	171757	238034	281081	287206	249396	143702	136170	139390	303118	210073	156782	190062	159549	266336	267007	342944	458093	501285	353190	279711	157257	340694	165056	223165	236127	134690	189276
n2525	666.222	18.0524	C24H42O21	Glycogen	8	Carbohydrate Metabolism	StarchandSucroseMetabolism	627663	0.670202	1	0.907903	0.518503	1.12836	0.888956	0.500708	0.562474	0.628583	0.675939	0.62142	0.524555	0.47782	0.680815	244664	254199	296852	282516	252181	415232	396159	373314	434025	366360	434105	323046	334318	353155	357645	231360	134182	204864	230829	228039	393823	627663	378231	417625	422549	370444	327231
n1532	356.074	12.618	C15H16O10	Caffeic acid 4-O-glucuronide	6	Carbohydrate Metabolism	Undefined	133107	0.605067	1	0.86797	0.535481	0.987052	0.858723	0.532265	0.515989	0.618771	0.486522	0.559229	0.455629	0.46593	0.613974	62335.4	68068.7	62586.1	74135	73441.8	105795	133107	108429	121085	94441.9	103109	96091.5	81222.4	107213	100908	53327.3	41120.7	51931.3	72573.9	82446.5	112707	124649	102298	115689	100227	98002.2	94691.9
n1967	453.034	15.7254	C15H17Cl2N3O9	3-hydroxyguanfacine glucuronide	6	Carbohydrate metabolism	Undefined	112429	0	0	0	86.1532	0	0	90.2265	0	0	0	0	0	12.9077	31.2623	0	0	0	0	0	0	0	0	0	0	0	0	0	0	0	72586	103148	71914.6	93528.5	89588.6	0	0	0	0	0	0	0
n2231	319.067	14.6461	C8H18NO10P	N-Gluconyl ethanolamine phosphate	6	Carbohydrate Metabolism	Undefined	210989	0.550332	1	2.45891	3.69224	0.885391	1.3633	3.25536	0.415828	0.981246	0.266617	0.564032	0.485894	0.61382	1.72518	20913.5	20765.3	34782.3	30820	24264.5	48258.6	35899.9	31613.8	80717	42540	113834	85698.6	95688.4	167742	124787	207044	142666	210989	170518	151335	34454.1	94827.3	23225.4	31781.5	27346.1	58826.8	67326.2
n25	402.298	4.13599	C22H42O6	Sorbitan palmitate	6	Carbohydrate Metabolism	Undefined	3726558	0.99206	1	0.76913	0.762089	0.865991	0.789761	0.745056	1.1382	0.931443	1.5634	1.12151	1.27291	1.65735	0.828006	1.67989e+06	1.38811e+06	1.61706e+06	1.36326e+06	1.50226e+06	1.99789e+06	1.48584e+06	1.74045e+06	1.05614e+06	1.3307e+06	1.25422e+06	1.29342e+06	1.38933e+06	902095	1.01479e+06	1.01676e+06	1.70448e+06	900546	1.1814e+06	997085	1.58719e+06	1.01592e+06	1.42051e+06	1.12344e+06	1.44401e+06	1.18597e+06	1.25779e+06
n3210	120.042	11.8125	C4H8O4	L-Erythrulose	8	Carbohydrate Metabolism	Undefined	142193	1.10072	1	0.456015	0.479461	0.848394	0.482156	0.440415	0.942459	0.581219	0.507263	1.15749	0.736281	0.437009	0.557021	141066	129297	96858.3	118413	117508	124548	113322	89639.2	92964.7	127479	48114.6	40036.5	43637.5	61792.2	56293.9	64881.1	37998.2	57083.3	54299.7	48459.7	116821	84247.2	87481.3	85685.9	90643.6	51399.8	60925.1
n62	120.042	15.947	C4H8O4	D-Erythrose	6	Carbohydrate Metabolism	Undefined	348517	0.563024	1	15.5472	17.7173	0.917645	12.2887	16.4293	1.07213	5.91007	0.932069	0.927558	3.22666	3.69492	7.47147	9477.68	7212.96	7724.32	12485.5	13435	14971.8	13580.7	15850.7	26212.6	18786.3	213612	286974	228001	315655	345711	305065	348517	322695	305301	302389	17128.3	13565.6	14465	18253.7	18626.7	201563	254131
p1533	279.132	11.0332	C11H21NO7	N-(1-Deoxy-1-fructosyl)valine	6	Carbohydrate Metabolism	Undefined	603249	1.00188	1	0.983231	0.880522	1.1152	1.04475	0.824319	1.06865	1.07639	1.03205	0.983338	1.0882	0.883711	0.896727	419316	473591	452374	439082	481113	406893	371659	439173	535637	507867	536638	429612	414958	413364	428738	392372	349891	365820	413958	469022	526371	458658	530779	483401	522511	445942	559117
p1537	357.125	10.9672	C16H23NO6S	Niazimicin A	6	Carbohydrate Metabolism	Undefined	348215	0.639938	1	1.28726	0.96264	0.837339	1.18474	0.948503	0.44304	1.15055	0.271926	0.571892	0.70175	0.756376	0.962664	118646	143119	99168.4	223541	171222	220023	160775	196606	341540	261945	296938	281907	332594	323242	285430	237901	312305	185262	184738	216565	218676	80017.6	168009	233674	288427	260059	257986
p199	503.185	17.0639	C18H33NO15	beta-D-Galactopyranosyl-(1->4)-2-amino-2-deoxy-beta-D-glucopyranosyl-(1->6)-D-mannose	8	Carbohydrate Metabolism	Undefined	187457949	0.13284	1	144.799	251.696	0.715435	115.052	244.472	0.660943	90.5363	5.83783	0.88223	51.1711	100.897	124.222	46888	47285.3	99171.6	148097	95514	413497	225662	647035	1.22246e+06	780694	7.92761e+07	9.42087e+07	8.93444e+07	1.15182e+08	9.8282e+07	1.61747e+08	1.87458e+08	1.65322e+08	1.65982e+08	1.47407e+08	289937	217857	304047	993352	548118	7.29552e+07	6.98072e+07
p2153	327.131	8.91917	C15H21NO7	N-(1-Deoxy-1-fructosyl)phenylalanine	6	Carbohydrate Metabolism	Undefined	479595	0.966482	1	1.04675	0.807001	1.09249	1.03327	0.828488	0.98862	1.05859	1.19006	1.00108	1.01543	1.05	0.834634	274054	326043	391637	365822	332497	333465	308088	368851	385895	352366	316921	402734	285893	410541	414333	290948	231878	222145	314619	351583	410088	329340	359827	404691	406454	365303	312301
p2500	277.116	12.3872	C11H19NO7	N-(1-Deoxy-1-fructosyl)proline	6	Carbohydrate Metabolism	Undefined	288946	1.22629	1	0.946893	0.858147	1.29023	0.984777	0.870733	1.05815	1.53867	1.20219	1.03427	1.29365	1.09405	0.979229	128256	151046	208313	138353	164014	109497	123669	138534	129484	143019	118790	131819	114048	118696	126637	99646.7	119818	95708.3	132495	105153	131289	118707	288946	134760	157465	107545	124913
p2644	311.104	10.2963	C11H21NO7S	N-(1-Deoxy-1-fructosyl)methionine	6	Carbohydrate Metabolism	Undefined	166026	0.689704	1	0.992498	0.561825	0.95433	0.993394	0.720783	0.679694	0.855664	0.868239	0.639508	0.945186	0.849158	0.739384	57223.1	88432	101298	94114.4	101785	125442	103733	139339	156257	117319	109211	131186	125589	127838	143449	71957.9	48119.9	49387	86043	105234	147282	110923	111815	111463	131283	85042.9	132709
p2676	317.123	12.358	C12H19N3O7	N-(1-Deoxy-1-fructosyl)histidine	6	Carbohydrate Metabolism	Undefined	132765	0.849263	1	1.12193	0.870257	1.07696	1.04374	0.853298	0.359782	0.893295	1.27005	0.686646	0.743932	0.894411	1.03377	35544.5	56011.1	104424	28074.7	48590.7	44849.8	60662.8	53547.7	102032	59945	76753.6	74571.6	68445.8	77118.2	63291.8	53895.8	36342.8	57402.8	74292.3	57451.1	49572	97807.9	51006.3	59431.8	87925.8	64374.7	64518.7
p3516	343.127	12.0023	C15H21NO8	N-(1-Deoxy-1-fructosyl)tyrosine	6	Carbohydrate Metabolism	Undefined	307209	0.823608	1	0.977436	0.849396	1.00253	0.976193	0.7805	0.904959	1.04651	1.01377	0.843121	0.951296	0.871842	0.853239	117440	160736	187512	171700	178525	195840	163010	195574	218600	217634	186420	174860	186935	209584	210507	174317	125903	145033	206066	190142	183334	184040	198868	205417	221501	185508	162800
p3781	263.064	17.4376	C9H13NO8	Ascorbalamic acid	8	Carbohydrate Metabolism	Undefined	197129	1.12459	1	0.842016	0.661354	1.07848	0.96727	0.635951	1.10866	0.817182	0.885188	1.07864	0.861913	0.758975	1.01473	170551	146595	167040	116116	117391	156752	135894	124557	109498	111479	113657	108401	95814.4	120056	99428.8	83302.2	88573.9	75580.4	85989.3	88616.7	165659	118006	162838	110659	131100	113666	130826
p684	281.111	13.0576	C10H19NO8	N-(1-Deoxy-1-fructosyl)threonine	6	Carbohydrate Metabolism	Undefined	472748	0.741171	1	0.82772	0.663131	0.964552	0.852271	0.688542	0.929365	0.869362	0.575984	0.90679	0.837646	0.525528	0.751129	238079	325741	167483	334789	273400	355816	269457	355664	399501	426826	349238	268269	260874	283199	334329	245814	209495	226948	272791	243406	388746	279230	472748	253666	348809	283510	286339
n1035	339.996	17.621	C6H14O12P2	D-Fructose 1,6-bisphosphate	8	Energy Metabolism	Carbon fixation	171526	0.430908	1	2.4659	7.84629	1.4707	2.27177	7.83399	0.43791	0.906119	0.503596	0.462042	0.678434	2.18891	2.1459	6698.96	4578.44	11713.9	5522.25	5159.96	12322	12724.2	12389.3	22509.8	18200	14867.7	36912.2	31504.2	51292	58122.8	128897	75132.6	101197	136399	171526	13301.8	40776.7	16329.9	20597.1	23922.7	29693.7	30568.2
n3126	210.074	13.9166	C7H14O7	Sedoheptulose	6	Energy Metabolism	Carbon fixation	124106	0.852381	1	1.73907	0.106459	0.877238	1.32839	0.0439693	0.493435	0.890187	0.0755868	0.66968	0.432803	0.182838	0.556638	46632.5	37375	32546.9	89560.4	60278.3	80755.9	47692.6	42997.7	88833.6	52248.5	108252	112583	86859.5	124106	111707	0	8997.17	24274.2	0	0	61378.6	23690.8	53049.7	68190.3	67852.2	95640.1	91175.3
p3217	210.074	10.1742	C7H14O7	Sedoheptulose	6	Energy Metabolism	Carbon fixation	465873	26.6688	0	291.892	164.255	0	317.311	189.336	0	119.344	63.4055	14.814	90.4821	115.99	149.031	29664.8	0	76513.8	27165.6	0	0	0	0	0	0	243590	230280	296492	389193	299905	231207	117788	160705	138393	173181	0	0	0	0	0	299232	252639
p3650	337.095	14.3601	C11H19N3O7S	S-(Hydroxymethyl)glutathione	8	Energy Metabolism	Methane metabolism	245095	0	0	11.6147	183.909	0	0	184.042	0	0	0	0	0	16.1866	47.5598	0	0	0	0	0	0	0	0	0	0	0	0	0	33115.6	24957.9	187475	210063	202028	150019	169959	0	0	0	0	0	0	0
p1990	665.125	13.1321	C21H29N7O14P2	NADH	8	Energy Metabolism	Oxidative phosphorylation	6236326	0.697123	1	12.1251	42.5968	0.773378	9.6507	40.148	0.308296	3.80358	1.43179	0.526298	2.38392	16.6893	11.6773	34667.8	67302.4	0	121244	101539	94418.8	46246	82905.3	162419	79857.2	957537	1.1815e+06	987853	1.68121e+06	840317	5.73187e+06	6.00993e+06	5.17258e+06	1.0487e+06	1.8805e+06	31824.5	71460.5	72948.5	114609	69432.6	763529	1.18608e+06
n1540	97.9768	15.6738	H3O4P	Orthophosphate	8	Energy Metabolism	Oxidative phosphorylation__Photosynthesis__Peptidoglycan biosynthesis	4491500	0.805551	1	1.7832	1.71448	1.00118	1.56799	1.61279	0.391351	0.938067	0.259537	0.549037	0.529441	0.623098	0.927531	1.49024e+06	1.28293e+06	1.47976e+06	2.46295e+06	1.80017e+06	2.22978e+06	1.60502e+06	1.63776e+06	3.07497e+06	2.02417e+06	3.78338e+06	3.26506e+06	3.26284e+06	4.4915e+06	4.04865e+06	3.85923e+06	3.33075e+06	4.41791e+06	3.47844e+06	3.03865e+06	2.14616e+06	2.0366e+06	1.62659e+06	2.25958e+06	2.51519e+06	2.887e+06	3.09656e+06
n907	97.977	12.8769	H3O4P	Orthophosphate	8	Energy Metabolism	Oxidative phosphorylation__Photosynthesis__Peptidoglycan biosynthesis	27973780	1.22369	1	0.825262	0.750565	0.933216	0.818055	0.803167	1.24021	1.16178	1.44244	1.17429	1.32737	1.13434	0.925614	2.20907e+07	1.91943e+07	2.34661e+07	1.76248e+07	2.0775e+07	1.74776e+07	1.71337e+07	1.72096e+07	1.52025e+07	1.72715e+07	1.19769e+07	1.4736e+07	1.40817e+07	1.40023e+07	1.47685e+07	1.12331e+07	1.27796e+07	1.22994e+07	1.33949e+07	1.35619e+07	1.57964e+07	1.3109e+07	1.57548e+07	1.65244e+07	1.74808e+07	1.26263e+07	1.49579e+07
p586	506.996	15.9516	C10H16N5O13P3	ATP	8	Energy Metabolism	Oxidative phosphorylation__Photosynthesis__Purine metabolism__Puromycin biosynthesis__Zeatin biosynthesis	1308568	0.785002	1	0.888279	1.12417	0.843199	0.836908	1.14015	0.642239	0.743468	0.320367	0.728169	0.602825	0.644227	0.877833	835826	636586	774552	746201	641224	1.01472e+06	700387	858238	1.03533e+06	1.02111e+06	936373	878364	635111	881646	781048	739788	1.30857e+06	902463	1.07716e+06	1.17667e+06	904001	721329	708145	781964	788392	791754	766240
p1428	427.029	14.7992	C10H15N5O10P2	ADP	8	Energy Metabolism	Oxidative phosphorylation__Photosynthesis__Purine metabolism__Zeatin biosynthesis	4432942	0.855597	1	1.25018	1.48015	0.867708	1.16872	1.44915	0.649204	0.972324	0.380779	0.784765	0.758987	0.697996	1.0117	1.92033e+06	1.89745e+06	2.25068e+06	2.52524e+06	2.13488e+06	2.71621e+06	1.83287e+06	2.14853e+06	3.08404e+06	2.75763e+06	3.10007e+06	2.73484e+06	2.57575e+06	3.74961e+06	3.51611e+06	3.45475e+06	4.43294e+06	3.61554e+06	3.50129e+06	3.55545e+06	2.48129e+06	1.59297e+06	2.16837e+06	2.17979e+06	2.45802e+06	2.8987e+06	2.84804e+06
p2905	456.105	11.4684	C17H21N4O9P	FMN	8	Energy Metabolism	Oxidative phosphorylation__Riboflavin metabolism	1533281	1.03212	1	1.12694	1.18088	1.03742	1.11347	1.24196	1.22386	1.74512	1.715	1.22207	2.06508	1.09773	1.28722	573052	662728	689862	644951	757885	654693	574197	557351	666778	771877	712235	604568	640983	805286	871192	713542	726808	717075	816171	834619	681642	403641	640961	677973	941339	744786	713107
p3038	745.09	16.6688	C21H30N7O17P3	NADPH	8	Energy Metabolism	Photosynthesis__Glutathione metabolism	918597	0.877831	1	9.0464	21.4539	0.452656	6.69389	18.8843	0	2.38898	0.910035	0.32724	1.21319	6.12468	7.58417	0	0	0	57011.4	58934.3	32175	0	0	57832.7	42074.3	247793	214047	202111	345640	185274	841903	553706	646943	345201	445925	0	27499	0	32288.7	0	180949	225814
p2545	743.075	16.443	C21H28N7O17P3	NADP+	8	Energy Metabolism	Photosynthesis__Glutathione metabolism__Nicotinate and nicotinamide metabolism	2432112	1.02826	1	1.51772	1.81205	0.782732	1.40108	1.71934	0.626595	1.11347	0.364684	0.760309	0.742714	0.569388	1.25482	1.02506e+06	1.0388e+06	1.12337e+06	1.51355e+06	1.11095e+06	1.07669e+06	808813	926846	1.52491e+06	1.31477e+06	1.41649e+06	1.68328e+06	1.41931e+06	2.05517e+06	2.00398e+06	2.07266e+06	2.03053e+06	1.5821e+06	2.43211e+06	2.12435e+06	1.02196e+06	564160	844669	1.00732e+06	985920	1.49733e+06	1.61039e+06
n2626	238.069	13.6084	C8H14O8	3-Deoxy-D-manno-octulosonate	8	Glycan Biosynthesis and Metabolism	Lipopolysaccharide biosynthesis	534257	1.70525	1	0.807796	0.847378	0.658997	0.769946	0.861893	0.537154	0.207141	0.212694	0.436256	0.155371	0.764604	0.730351	450701	455099	391600	343302	197816	198150	304301	200181	249993	125524	150923	143243	139539	199677	237544	143126	301655	178844	154703	135272	142478	168372	128494	153365	117788	153083	120285
n686	392.292	7.56108	C24H40O4	[ST hydrox] 3alpha,12alpha-Dihydroxy-5beta-cholan-24-oic Acid	6	Lipid Metabolism	Bile acid biosynthesis	562709	1.33258	1	0.715904	0.675115	0.959771	0.761689	0.617966	1.18247	0.937291	1.03844	1.06791	1.21676	0.724374	0.770579	562709	419755	447317	449063	426179	385249	360061	360082	286692	337657	257209	244384	304479	189176	243081	230591	187401	244045	257426	248311	335767	352137	351029	351830	269393	230991	257431
n1461	216.04	13.4431	C5H13O7P	2-C-Methyl-D-erythritol 4-phosphate	8	Lipid Metabolism	Biosynthesis of steroids	9346523	1.83133	1	1.64354	1.20256	1.29128	1.56562	1.21063	0.757371	1.24619	2.89487	0.924405	1.09895	1.61113	1.24606	872338	750818	5.9907e+06	876112	1.21096e+06	846344	1.04484e+06	812640	1.48176e+06	1.11162e+06	1.57601e+06	1.70656e+06	1.6456e+06	1.96328e+06	1.81474e+06	1.04984e+06	1.21535e+06	1.11424e+06	1.42764e+06	1.56312e+06	943666	2.10408e+06	907073	1.43701e+06	1.44837e+06	1.51713e+06	1.54071e+06
n1435	501.664	5.14592	C37H64N7O17P3S	trans-Hexadec-2-enoyl-CoA	6	Lipid Metabolism	Fatty acid elongation in mitochondria__Fatty acid metabolism	1504271	0.768588	1	2.90258	0.387274	0.557898	2.21281	0.23419	0.623993	1.00815	0	0.343038	0.470426	0.576848	0.688499	250883	276030	172862	387559	368013	401885	287640	299524	536583	367903	679119	1.09846e+06	1.04485e+06	1.50427e+06	1.16944e+06	148849	60503.6	139576	169459	214929	200528	142844	135206	315659	262163	705282	1.04639e+06
n1689	172.014	14.7174	C3H9O6P	sn-Glycerol 3-phosphate	10	Lipid Metabolism	Glycerolipid metabolism__Glycerophospholipid metabolism	4021580	0.68059	1	1.10003	0.859166	0.854916	0.780196	0.826836	0.961577	1.05685	0.452735	0.858748	0.789953	0.411877	0.826543	2.06298e+06	2.11761e+06	1.44031e+06	2.06611e+06	1.98124e+06	2.77677e+06	2.80368e+06	2.91053e+06	2.84766e+06	2.86704e+06	2.03377e+06	2.74817e+06	3.3883e+06	4.02158e+06	3.43485e+06	2.94596e+06	1.95718e+06	2.57634e+06	2.43575e+06	2.28981e+06	2.92582e+06	2.77409e+06	2.46167e+06	2.01013e+06	1.97295e+06	1.75012e+06	2.54464e+06
n786	215.056	15.5637	C5H14NO6P	sn-glycero-3-Phosphoethanolamine	8	Lipid Metabolism	Glycerophospholipid metabolism__Ether lipid metabolism	37213930	1.12428	1	0.285756	0.017961	0.700952	0.216224	0.0145378	1.50072	0.471401	0.127942	0.980853	0.416067	0.0679187	0.406588	2.7091e+07	2.78039e+07	2.47736e+07	1.96334e+07	2.43486e+07	2.1382e+07	2.46381e+07	2.14842e+07	1.87843e+07	2.36929e+07	4.15073e+06	6.66413e+06	7.35009e+06	6.19264e+06	7.07035e+06	408214	215569	358669	471394	521533	2.15289e+07	1.08182e+07	1.87481e+07	1.2282e+07	1.37147e+07	4.90469e+06	5.35201e+06
p1986	257.103	14.4455	C8H20NO6P	sn-glycero-3-Phosphocholine	10	Lipid Metabolism	Glycerophospholipid metabolism__Ether lipid metabolism	6109901	0.630502	1	1.21713	0.836286	1.12011	1.21855	0.86454	0.704382	0.772167	0.532364	0.735837	0.674635	0.416351	0.868602	2.06407e+06	2.32106e+06	3.34904e+06	2.09473e+06	1.77812e+06	2.82392e+06	3.38039e+06	4.03387e+06	4.23842e+06	3.93256e+06	4.22943e+06	4.38854e+06	5.76065e+06	4.07379e+06	3.954e+06	3.32718e+06	4.09199e+06	2.14027e+06	2.7592e+06	3.07667e+06	2.82017e+06	6.1099e+06	4.2077e+06	4.21517e+06	3.26733e+06	4.86314e+06	5.0253e+06
p1435	183.066	14.8706	C5H14NO4P	Choline phosphate	8	Lipid Metabolism	Glycerophospholipid metabolism__Glycine, serine and threonine metabolism	288624	0.950356	1	1.80342	1.45078	1.21086	1.47387	1.50546	0.650194	1.1309	0.896253	0.760603	0.799111	0.882777	0.68096	95802.1	106227	165324	138457	84747.3	99124	98620.3	130730	157540	135393	169402	208392	189492	288624	264749	202339	124677	174440	193864	206207	127591	228395	117514	129721	149216	146239	159579
n1888	102.032	15.6044	C4H6O3	Acetoacetate	6	Lipid Metabolism	Synthesis and degradation of ketone bodies__Valine, leucine and isoleucine degradation__Tyrosine metabolism__Propanoate metabolism__Styrene degradation__Butanoate metabolism	220459	1.03106	1	4.44188	4.51206	1.33413	3.35697	4.07593	0.981454	1.78461	2.93051	0.947785	1.259	2.38167	2.15624	26839.8	28467.9	47020.7	29809.7	28451.9	34222	29370	30243.6	30687.1	31230	107892	115828	150449	178222	139445	144908	141131	166195	122394	128138	30433.7	79680.5	33010.6	32478.8	32190	100978	108107
p1644	590.527	3.66405	C38H70O4	Polyoxyethylene dioleate	6	Lipid Metabolism	Undefined	3226322	0.334336	1	5.25809	19.8346	0.824051	4.52713	21.89	2.93677	9.13053	16.5266	1.60936	10.5345	31.454	9.39209	0	0	110998	0	0	115102	0	0	98405.2	118488	368618	342627	328772	394575	311068	1.33177e+06	1.35126e+06	1.25097e+06	1.25388e+06	1.39711e+06	0	0	175981	0	97599.8	322312	247627
n1006	172.11	5.04553	C9H16O3	9-Oxononanoic acid	6	Lipids: Fatty Acyls	alpha-Linolenic acid metabolism	358839	1.34552	1	0.567519	0.601573	0.826702	0.611965	0.591882	1.10752	0.791453	0.92928	0.959182	0.970284	0.965716	0.739663	358839	155968	245010	168776	168795	175717	176849	149196	159422	154402	103177	91435.2	99455	82918.1	85875.1	107192	108869	81883.7	108745	83944.8	148979	117586	165200	113237	129244	90257	109325
p2652	128.059	9.63376	C5H8N2O2	[FA amino(4:0)] 2-amino-4-cyano-butanoic acid	6	Lipids: Fatty Acyls	Amino Fatty Acids	327022	0.979207	1	2.47717	3.72319	0.935565	1.94837	3.58019	1.13479	1.32978	1.42403	0.946021	1.25685	2.17949	1.8396	61344.2	64369.9	79332.8	51264.8	61799.9	60708.2	65719.5	61071.5	64872.6	72494.9	184391	184506	110628	185075	140150	219360	327022	230868	218582	213709	70142.5	62684.2	63477.5	53533.7	54095.9	99680.1	153810
p3296	243.22	4.39939	C14H29NO2	[FA amino(14:0)] 2-amino-tetradecanoic acid	8	Lipids: Fatty Acyls	Amino Fatty Acids	950271	1.3371	1	0.969238	0.770037	1.47035	1.23597	1.07282	1.82469	1.41695	1.9986	1.54009	1.60085	2.14473	1.3507	420488	371696	459363	406992	368427	244393	315149	519755	210716	225925	400978	281816	258224	304423	223864	209408	253792	205597	191749	306783	444685	436878	485278	480215	381895	322593	354424
p3333	103.063	8.95944	C4H9NO2	[FA amino(4:0)] 2R-amino-butanoic acid	6	Lipids: Fatty Acyls	Amino Fatty Acids	809125	1.17456	1	0.716455	0.570636	0.857671	0.639927	0.593895	1.14217	0.836896	1.15531	1.11008	0.984398	0.90592	0.751494	535637	581827	717026	573551	632920	632573	503220	500321	456373	496536	416265	387807	342882	334004	373959	249346	328141	286515	313896	299491	554163	338996	534476	392213	400681	410923	319769
n30	340.334	4.03514	C22H44O2	Docosanoic acid	6	Lipids: Fatty Acyls	Biosynthesis of unsaturated fatty acids	1492871	0.980693	1	0.832705	0.591128	0.772474	0.68138	0.618067	1.0026	0.931552	1.62987	1.28561	1.16171	1.5117	0.682484	745678	473771	244420	479051	971234	833288	576518	422459	715358	423903	658004	644761	490346	362678	318616	380788	514218	261061	327783	272702	552846	196241	510167	498400	537772	452730	449521
n162	342.277	3.79621	C20H38O4	1,9S,11R,15S-tetrahydroxy-13E-prostaene	6	Lipids: Fatty Acyls	Eicosanoids	918922	1.27878	1	0.75852	0.458684	0.889621	0.713956	0.479835	1.48647	0.8362	1.13027	1.05819	0.976248	1.09759	0.754286	638928	718867	724691	527705	493689	624097	533260	448795	414584	406491	391308	392917	357353	365548	333972	214511	157141	215660	269324	256693	496597	335118	401301	472386	453911	326407	350927
n2076	438.255	4.06525	C23H38N2O4S	15S-hydroxy,14R-(S-cysteinyl)-5Z,8Z,10E,12E-eicosatetraenoic acid	8	Lipids: Fatty Acyls	Eicosanoids	3570249	1.19989	1	1.12916	0.912437	1.56855	1.14709	0.664561	1.42396	1.27198	1.88867	3.05663	1.08083	1.85466	2.61565	532229	853903	1.08098e+06	812561	694347	901733	722416	414347	505104	768388	1.73283e+06	663822	530045	381367	431686	824648	771597	474949	385810	564974	1.50515e+06	612844	931290	1.05188e+06	1.09386e+06	695232	810200
n1626	200.178	4.13149	C12H24O2	Dodecanoic acid	8	Lipids: Fatty Acyls	Fatty acid biosynthesis	7850631	1.40965	1	0.410613	0.356994	0.600543	0.35292	0.350971	1.09727	0.447433	0.835984	0.717185	0.507251	0.708613	0.633995	7.85063e+06	4.61277e+06	6.62087e+06	4.08744e+06	4.1023e+06	4.28308e+06	6.07998e+06	3.13339e+06	2.94555e+06	2.90609e+06	2.42497e+06	1.66506e+06	1.58678e+06	1.1632e+06	1.10456e+06	1.10194e+06	2.04033e+06	1.2122e+06	1.69379e+06	858892	2.07291e+06	2.54406e+06	2.11685e+06	2.4493e+06	2.43622e+06	1.61681e+06	1.62991e+06
n2	254.225	3.99645	C16H30O2	FA(16:1)	6	Lipids: Fatty Acyls	Fatty acid biosynthesis	700751819	1.32471	1	0.127776	0.0172545	0.447779	0.0780573	0.0178447	1.81393	0.217128	0.236103	0.684309	0.185226	0.0733281	0.303577	3.1506e+08	4.1822e+08	2.62037e+08	2.78731e+08	2.8668e+08	2.03128e+08	3.95143e+08	2.1726e+08	1.57314e+08	2.05325e+08	1.87458e+07	3.68868e+07	3.69816e+07	2.78145e+07	3.01132e+07	3.1294e+06	7.5281e+06	3.67514e+06	2.98172e+06	3.01431e+06	1.23208e+08	1.13848e+08	1.17474e+08	9.01127e+07	8.29167e+07	2.46942e+07	2.0648e+07
n2009	144.115	7.52487	C8H16O2	FA (8:0) octanoic acid	8	Lipids: Fatty Acyls	Fatty acid biosynthesis	795785	1.1071	1	0.759273	0.739432	0.911285	0.776995	0.685686	1.17176	1.02612	1.15528	1.09117	1.18082	0.876909	0.861857	504443	590893	571065	513546	509189	366741	479681	562484	467968	552121	335486	387241	426231	352650	342663	331124	377738	315996	367775	403444	415257	317312	607248	437669	436021	352691	370978
n7	228.209	4.04418	C14H28O2	Tetradecanoic acid	6	Lipids: Fatty Acyls	Fatty acid biosynthesis	43111391	1.34241	1	0.370002	0.292326	0.600612	0.346651	0.305241	1.28286	0.480383	0.710971	0.724887	0.478859	0.516229	0.486001	3.8058e+07	3.00142e+07	4.31114e+07	2.67106e+07	2.54453e+07	2.52998e+07	3.81203e+07	2.09489e+07	1.86364e+07	1.86708e+07	9.81598e+06	1.1152e+07	9.08176e+06	7.42256e+06	7.54813e+06	6.29478e+06	1.17886e+07	6.03175e+06	6.80666e+06	4.64724e+06	1.3993e+07	1.47245e+07	1.51847e+07	1.51924e+07	1.39856e+07	1.18074e+07	8.27441e+06
n84	172.146	4.28178	C10H20O2	Decanoic acid	8	Lipids: Fatty Acyls	Fatty acid biosynthesis	2683411	1.37741	1	0.337032	0.302891	0.501277	0.283314	0.332382	1.0686	0.410009	0.671045	0.573248	0.392227	0.529764	0.56761	2.55612e+06	1.66909e+06	2.68341e+06	1.57307e+06	1.31645e+06	1.3188e+06	2.42351e+06	1.28197e+06	1.07446e+06	1.01472e+06	553312	568567	464968	466580	344035	433461	498874	417736	504089	300443	750292	679302	658634	784551	693039	482656	406169
n18	284.271	4.12688	C18H36O2	Octadecanoic acid	10	Lipids: Fatty Acyls	Fatty acid biosynthesis__Biosynthesis of unsaturated fatty acids	718092257	1.05987	1	0.800225	0.662221	0.846094	0.751025	0.715911	1.16267	0.865562	1.45635	1.13533	1.16815	1.46445	0.734363	4.2046e+08	3.48047e+08	3.25786e+08	3.28088e+08	3.52416e+08	3.81225e+08	3.48364e+08	3.93593e+08	2.49614e+08	3.01744e+08	2.69893e+08	3.29884e+08	3.28325e+08	1.99814e+08	2.12093e+08	2.38824e+08	2.64915e+08	2.01899e+08	2.00542e+08	2.02735e+08	3.00324e+08	2.20287e+08	3.22492e+08	2.90296e+08	2.8342e+08	2.5865e+08	2.56153e+08
n1	256.24	4.01516	C16H32O2	FA(16:0)	8	Lipids: Fatty Acyls	Fatty acid biosynthesis__Fatty acid elongation in mitochondria__Fatty acid metabolism__Biosynthesis of unsaturated fatty acids	1462223486	1.23033	1	0.247634	0.117159	0.457931	0.195034	0.120255	1.46886	0.380832	0.367178	0.648784	0.364676	0.246984	0.380599	1.05404e+09	8.70552e+08	7.02543e+08	7.06471e+08	7.05243e+08	7.15641e+08	9.42326e+08	5.32789e+08	5.18324e+08	5.7367e+08	1.44143e+08	1.8924e+08	1.79155e+08	1.52917e+08	1.47464e+08	6.3739e+07	1.06241e+08	6.25327e+07	9.53747e+07	5.67165e+07	3.51506e+08	2.80333e+08	2.98035e+08	2.94493e+08	2.78906e+08	1.51799e+08	1.4662e+08
n1045	240.1	4.52331	C12H16O5	3-carboxy-4-methyl-5-propyl-2-furanpropanoic acid	6	Lipids: Fatty Acyls	Fatty Acids and Conjugates	406821	1.16196	1	0.670095	0.575799	0.904734	0.717177	0.651745	1.40405	0.882787	0.812296	1.11174	0.923243	0.82513	0.989563	357324	303676	291416	217022	239887	236127	284144	229398	250724	212497	163396	202221	126526	158683	161925	146055	169272	107885	126306	148862	246055	181535	251216	220151	198386	178604	184687
n11	226.193	4.06507	C14H26O2	FA (14:1) tetradecenoic acid	6	Lipids: Fatty Acyls	Fatty Acids and Conjugates	9414613	1.12329	1	0.101156	0.0603159	0.286009	0.0813347	0.0591382	1.31147	0.151651	0.306321	0.402745	0.14921	0.121989	0.255387	4.31136e+06	5.09109e+06	4.50929e+06	6.14172e+06	4.9896e+06	4.14717e+06	8.50894e+06	3.95056e+06	2.2679e+06	3.41979e+06	359740	664875	444343	325929	460322	160597	768914	242802	105387	67004.6	1.41653e+06	1.19826e+06	1.47136e+06	1.22236e+06	1.06788e+06	481623	399475
n1158	270.256	3.95938	C17H34O2	FA (17:0)	8	Lipids: Fatty Acyls	Fatty Acids and Conjugates	19296330	1.1812	1	0.601182	0.447342	0.604385	0.508944	0.464804	1.3048	0.903133	2.76782	0.74118	0.914169	1.6386	0.732446	5.4349e+06	4.7462e+06	6.25127e+06	4.08148e+06	4.87624e+06	4.9583e+06	6.06669e+06	3.90637e+06	3.17011e+06	3.39379e+06	2.94374e+06	3.00382e+06	2.90829e+06	1.95401e+06	2.11271e+06	1.75199e+06	2.24763e+06	1.82164e+06	1.89401e+06	1.90046e+06	2.51852e+06	2.51123e+06	2.54565e+06	3.01129e+06	2.40473e+06	3.1542e+06	2.08277e+06
n1159	268.24	3.97135	C17H32O2	FA methyl(16:1)	6	Lipids: Fatty Acyls	Fatty Acids and Conjugates	18962520	0.901256	1	0.366111	0.541333	0.478669	0.311603	0.595784	1.53139	0.69406	5.24747	0.782547	0.773295	1.74505	0.720052	2.07555e+06	2.3974e+06	1.9273e+06	1.65839e+06	1.76679e+06	1.94431e+06	3.40413e+06	2.087e+06	1.60557e+06	1.86092e+06	661565	1.02154e+06	997617	573880	736719	911441	2.00162e+06	1.19081e+06	860442	937264	970557	1.06771e+06	1.24278e+06	1.00427e+06	933105	879968	816676
n1160	242.225	4.01633	C15H30O2	FA methyl(14:0)	6	Lipids: Fatty Acyls	Fatty Acids and Conjugates	6990547	1.25108	1	0.554832	0.607839	0.583551	0.500201	0.594969	1.16946	0.686565	1.5382	0.711756	0.706098	0.994199	0.644676	4.30442e+06	2.62072e+06	5.3427e+06	2.51082e+06	2.72802e+06	3.22367e+06	4.27198e+06	2.37788e+06	1.82331e+06	2.2964e+06	1.6884e+06	1.97207e+06	1.69883e+06	1.07776e+06	1.32683e+06	1.65872e+06	2.13487e+06	1.47567e+06	1.75204e+06	1.48433e+06	1.55915e+06	1.73472e+06	1.56936e+06	1.75865e+06	1.54389e+06	2.17042e+06	1.27765e+06
n1221	118.063	7.57585	C5H10O3	5-Hydroxypentanoate	8	Lipids: Fatty Acyls	Fatty Acids and Conjugates	8624552	0.623975	1	4.66603	9.55472	1.89717	5.59411	11.193	0.631823	6.02439	9.83917	1.35663	5.91989	10.2251	5.42377	374705	337781	310190	293981	221051	433682	444694	418629	668945	498423	3.44317e+06	1.72245e+06	2.13862e+06	2.18308e+06	2.01153e+06	6.21259e+06	3.35683e+06	3.602e+06	4.9338e+06	5.44117e+06	977783	807847	1.11258e+06	914589	862535	4.03484e+06	2.34277e+06
n1260	272.235	4.09748	C16H32O3	FA hydroxy(16:0)] hexadecanoic acid	6	Lipids: Fatty Acyls	Fatty Acids and Conjugates	2651093	1.07073	1	0.302547	0.4702	0.630182	0.258579	0.566293	0.994524	0.420662	0.843288	0.8091	0.540244	0.650325	0.49279	1.92487e+06	1.59337e+06	2.05214e+06	1.60273e+06	1.40778e+06	1.67449e+06	2.26639e+06	1.49171e+06	1.41188e+06	1.16963e+06	533676	658703	553664	306638	371958	330006	2.20957e+06	566348	366023	296279	1.26505e+06	1.11548e+06	939881	888024	841898	490137	452011
n1273	296.235	4.06617	C18H32O3	FA hydroxy (18:2)	8	Lipids: Fatty Acyls	Fatty Acids and Conjugates	7332740	1.23366	1	0.815359	2.70833	0.740774	0.993354	3.05253	1.35077	1.2505	1.96327	1.00917	1.58655	2.40248	1.52834	1.11447e+06	1.18183e+06	1.09879e+06	654009	756742	393114	965864	720294	528167	1.28814e+06	815390	909014	731436	423757	296695	1.11086e+06	5.90308e+06	1.8222e+06	830548	883806	162426	623967	661909	699636	737803	1.0517e+06	838348
n1274	298.251	4.06284	C18H34O3	FA oxo(18:0)	6	Lipids: Fatty Acyls	Fatty Acids and Conjugates	5666791	1.03681	1	0.425758	0.651754	0.514624	0.441399	0.733449	1.09754	0.612442	1.00627	0.615998	0.707986	0.970416	0.53414	3.79547e+06	3.06558e+06	3.74957e+06	2.31379e+06	2.58381e+06	2.94937e+06	5.12201e+06	2.70798e+06	1.73926e+06	2.43894e+06	1.42243e+06	1.53013e+06	1.4251e+06	946373	1.04428e+06	1.29658e+06	5.00427e+06	1.55854e+06	990887	898376	1.33949e+06	1.53285e+06	1.84281e+06	1.59447e+06	1.3879e+06	1.6388e+06	1.30466e+06
n1459	198.162	4.15371	C12H22O2	FA (12:1) dodecenoic acid	8	Lipids: Fatty Acyls	Fatty Acids and Conjugates	10875820	1.44086	1	0.0390939	0	0.177475	0.0428234	0.00398002	1.60452	0.0789271	0.121501	0.225069	0.0366207	0.044596	0.252238	5.22919e+06	6.14289e+06	4.82504e+06	5.79324e+06	4.2969e+06	3.37841e+06	6.84376e+06	4.05445e+06	1.64009e+06	2.32741e+06	0	157067	176542	126885	252740	0	0	0	0	0	821003	571662	1.0012e+06	500312	343701	103340	141149
n1460	216.173	4.17022	C12H24O3	FA hydroxy(12:0) dodecanoic acid	6	Lipids: Fatty Acyls	Fatty Acids and Conjugates	1025525	0.429576	1	0	0	0.226418	0	0	1.02527	0.0428679	0.766155	0.445051	0.0779272	0.123187	0.0770234	300960	356873	222056	214328	0	508210	1.02552e+06	575186	277624	160654	0	0	0	0	0	0	0	0	0	0	185831	182086	208815	0	0	0	0
n1473	284.271	7.43971	C18H36O2	FA dimethyl(16:0)	8	Lipids: Fatty Acyls	Fatty Acids and Conjugates	9726764	0.997289	1	1.13603	1.03041	0.909137	1.15449	0.894313	1.15793	3.1432	1.60528	1.112	2.20843	1.33012	1.14954	1.45573e+06	1.40944e+06	1.08448e+06	1.69202e+06	1.61525e+06	1.45507e+06	1.3351e+06	1.50361e+06	1.49777e+06	1.48511e+06	1.42344e+06	1.4458e+06	2.67483e+06	1.41781e+06	1.30462e+06	2.02017e+06	1.52676e+06	1.15377e+06	1.43923e+06	1.35797e+06	1.27137e+06	907193	1.42797e+06	1.4271e+06	1.58184e+06	1.21483e+06	1.39454e+06
n155	398.34	3.78701	C24H46O4	Axillarenic acid	6	Lipids: Fatty Acyls	Fatty Acids and Conjugates	2989961	0.798157	1	0.944554	0.90267	0.413687	0.582919	0.748995	1.11501	1.01264	3.34822	0.485625	0.73242	4.75457	0.761671	364208	318905	188360	295684	305774	369066	502723	299333	349879	324414	353989	383787	260702	456264	288353	369495	335930	393795	304424	262159	210765	85915.6	115119	117057	234569	216912	161939
n16	270.219	4.05382	C16H30O3	FA oxo(16:0)	6	Lipids: Fatty Acyls	Fatty Acids and Conjugates	4713769	0.940412	1	0.170214	0.13266	0.382991	0.169724	0.129369	1.13692	0.227266	0.354992	0.41106	0.262995	0.283495	0.299181	2.75242e+06	2.38452e+06	2.83134e+06	1.85184e+06	1.87995e+06	2.06814e+06	4.71377e+06	2.58287e+06	1.42843e+06	1.64821e+06	477072	490848	570867	314183	264731	253659	484514	368464	341639	202200	900237	1.1486e+06	1.06641e+06	810982	838716	465324	447272
n1627	300.266	4.04204	C18H36O3	FA hydroxy(18:0)	6	Lipids: Fatty Acyls	Fatty Acids and Conjugates	5456412	2.0181	1	0.405895	0.523816	0.577415	0.414819	0.550944	1.18988	0.52675	0.706387	0.632281	0.618451	0.758135	0.609113	4.45149e+06	4.57383e+06	5.45641e+06	3.2857e+06	3.71092e+06	1.91397e+06	3.5381e+06	1.698e+06	1.758e+06	1.73475e+06	1.04552e+06	1.02552e+06	1.07262e+06	624479	551729	823007	2.49786e+06	874265	787109	592640	1.2588e+06	1.32813e+06	1.11288e+06	1.18589e+06	1.25963e+06	1.15767e+06	928169
n1736	158.131	4.40042	C9H18O2	FA methyl(8:0)	6	Lipids: Fatty Acyls	Fatty Acids and Conjugates	3312011	1.51526	1	0.776033	0.504062	0.657607	0.564773	0.545486	0.99191	0.768932	0.933543	0.802561	0.796553	0.962489	1.17523	3.31201e+06	1.48066e+06	2.43084e+06	1.32263e+06	1.30723e+06	1.3765e+06	1.68633e+06	1.77552e+06	808510	855911	1.5657e+06	986091	1.3323e+06	521303	640967	628669	684994	595933	647856	720349	717812	853804	770357	902642	1.03166e+06	728964	774889
n1871	330.24	4.7883	C18H34O5	FA trihydroxy(18:1)	6	Lipids: Fatty Acyls	Fatty Acids and Conjugates	552923	1.54575	1	0.703561	1.77272	1.63211	0.881435	2.48388	1.56154	1.05343	1.6664	1.78084	1.2095	1.27891	1.39624	80583.7	100643	192483	82181.7	95535.3	59466.1	100963	75096.5	55394.3	65817.7	56716.8	50152.8	61063.1	46602.1	36451.9	54408.5	321643	145603	60898.9	49840.7	87793.5	209246	107096	94740.5	83358.5	68543.2	87683.8
n1874	156.079	4.75061	C8H12O3	[FA oxo(8:1)] 5-oxo-7-octenoic acid	6	Lipids: Fatty Acyls	Fatty Acids and Conjugates	411673	1.6383	1	0.298342	0.353764	0.57204	0.279775	0.404437	0.943686	0.288256	0.836941	0.497019	0.311643	0.676661	0.529112	411673	132035	278139	134457	123259	174688	225966	52192.3	121199	84908.4	50539	31143.9	39166.8	39365.6	36378.3	35188.6	38496.8	42666.7	84255.1	32507.3	78492.1	100554	30134.9	72101.3	95665.6	23371.8	58548.1
n1930	214.157	4.22664	C12H22O3	3-Oxododecanoic acid	8	Lipids: Fatty Acyls	Fatty Acids and Conjugates	4486978	1.166	1	0.575334	0.385236	0.555621	0.424657	0.323909	1.16147	0.695165	0.785164	1.01767	0.607184	0.388671	0.598828	1.80479e+06	2.59332e+06	4.21813e+06	1.9193e+06	2.67361e+06	2.86181e+06	3.01317e+06	1.52081e+06	1.69291e+06	2.23985e+06	923193	1.75392e+06	1.49729e+06	793893	1.54942e+06	929343	798564	743601	986610	906049	1.35448e+06	586650	1.76608e+06	1.05541e+06	1.53177e+06	473588	1.16652e+06
n1995	144.115	4.63605	C8H16O2	FA ethyl(6:0)	8	Lipids: Fatty Acyls	Fatty Acids and Conjugates	2807659	1.50301	1	0.398327	0.265843	0.496641	0.296949	0.274494	1.24165	0.41484	0.635202	0.550875	0.392462	0.438564	0.987916	2.29792e+06	1.8408e+06	2.80766e+06	1.81508e+06	1.4279e+06	1.26765e+06	2.10493e+06	1.4259e+06	988388	992458	1.11333e+06	450388	419702	384035	332939	362143	337818	341613	426763	333897	670723	673883	692993	623364	705930	530076	455777
n1997	142.099	4.68983	C8H14O2	FA (8:1)	6	Lipids: Fatty Acyls	Fatty Acids and Conjugates	136015	1.37883	1	0.419547	0.261111	0.449141	0.310579	0.312305	0.922499	0.475671	0.987991	0.545184	0.396897	0.583529	0.781375	136015	102355	112836	90497.2	75390.6	83935.5	101674	82511.9	47014.9	59888	50880.9	22473.9	45700.1	21552.1	16733.4	17511.6	34289.5	16642.6	15044.5	14434.8	22933.5	45290.3	29748.4	45699.8	24767	40543.2	16210.5
n2012	172.11	7.55013	C9H16O3	FA oxo(9:0) oxo-nonanoic acid	6	Lipids: Fatty Acyls	Fatty Acids and Conjugates	617120	1.14619	1	0.719336	0.612546	0.913803	0.840576	0.635523	1.15799	0.899171	1.17285	1.03741	1.1187	0.717855	1.08351	381524	315752	410077	262044	283426	288179	280710	338297	255042	279793	222663	176686	256443	195778	185727	176806	181825	139660	169061	215953	238515	145056	373325	282234	278594	274036	247469
n2015	200.178	7.51734	C12H24O2	[FA methyl(11:0)] 10-methyl-undecanoic acid	6	Lipids: Fatty Acyls	Fatty Acids and Conjugates	491067	1.04023	1	0.728666	0.68126	0.9255	0.794959	0.68234	1.19694	1.01199	1.26604	1.07385	1.15766	0.903813	0.903077	299825	304995	273740	258017	282187	297325	273026	270641	260382	262522	194588	205323	219120	176865	197930	186313	179595	184234	174363	204663	277120	179100	292582	248736	264750	190396	233236
n2044	102.068	7.56951	C5H10O2	Pentanoate	10	Lipids: Fatty Acyls	Fatty Acids and Conjugates	3221231	0.996248	1	0.914729	0.511172	0.842578	0.963928	0.556002	1.00451	1.29367	0.944424	0.866122	1.31403	0.707234	0.962227	2.41254e+06	1.62628e+06	2.32382e+06	1.48874e+06	1.69464e+06	2.26778e+06	2.54042e+06	1.49511e+06	1.92117e+06	1.35749e+06	1.86245e+06	1.72157e+06	1.89167e+06	1.74068e+06	1.54855e+06	996021	807739	1.04532e+06	990875	1.05808e+06	1.66878e+06	1.21307e+06	1.69771e+06	1.7542e+06	1.7398e+06	2.1668e+06	1.84143e+06
n2110	258.183	4.21572	C14H26O4	FA methyl(15:0) tridecanedioic acid	8	Lipids: Fatty Acyls	Fatty Acids and Conjugates	2813859	0.807745	1	0.607691	0.282383	0.4339	0.337387	0.315054	0.714245	0.91017	0.894434	0.912262	0.960128	0.360819	0.646011	670224	1.45929e+06	1.12183e+06	935577	798438	1.86218e+06	2.2339e+06	0	609525	1.46635e+06	534162	756251	1.0405e+06	277821	1.14191e+06	350334	399606	355154	424652	213108	973771	81707.9	336737	392060	893732	100328	651117
n2331	132.079	7.53626	C6H12O3	FA hydroxy(6:0)	6	Lipids: Fatty Acyls	Fatty Acids and Conjugates	250732	0.789152	1	0.302484	0.183676	0.638073	0.329529	0.18678	1.16754	0.310538	0.481626	0.475597	0.320049	0.249908	0.753191	79692.1	134992	147313	141293	43859	172658	191733	135387	131491	62069.3	49070.1	37594.7	48614.3	22162	52282.6	20721.8	19612.8	18291.5	39500.7	29222.5	230831	45624.4	93148.8	29956.4	42839.9	24838.3	43238.9
n24	312.303	4.0554	C20H40O2	FA (20:0)	6	Lipids: Fatty Acyls	Fatty Acids and Conjugates	4485536	1.11996	1	0.749759	0.588232	0.704128	0.653749	0.626615	1.18321	0.775022	1.34066	0.998966	1.01218	1.49608	0.630536	3.12129e+06	1.96013e+06	1.30875e+06	2.04481e+06	2.01266e+06	2.23502e+06	2.53025e+06	1.7278e+06	1.34554e+06	1.48993e+06	1.48744e+06	1.76874e+06	1.52996e+06	1.162e+06	1.04602e+06	1.30627e+06	1.51507e+06	900853	845215	919948	1.28185e+06	1.08434e+06	1.49748e+06	1.40447e+06	1.30036e+06	1.17783e+06	1.11912e+06
n2425	310.287	3.89495	C20H38O2	FA (20:1)	8	Lipids: Fatty Acyls	Fatty Acids and Conjugates	1687777	1.23546	1	0.456327	0.289474	0.649555	0.429893	0.310098	1.56998	0.723746	0.685924	0.905757	0.659222	0.544067	0.493882	889930	1.14885e+06	376586	839567	745249	702398	935156	657435	434971	507835	315542	323831	327571	276924	233625	106525	367833	166704	180014	116181	383655	381121	516328	418457	403566	331884	264758
n2726	160.11	7.56795	C8H16O3	FA hydroxy(8:0) hydroxy-octanoic acid	8	Lipids: Fatty Acyls	Fatty Acids and Conjugates	605896	1.07759	1	0.510644	0.387876	0.819809	0.485952	0.352296	0.973171	0.577769	0.655898	0.921488	0.714317	0.428582	0.662881	502682	520508	492773	471724	522284	484636	474258	528790	393664	447892	285434	243397	218621	208057	233904	165809	172677	199513	186572	178887	426922	334083	469714	325916	352895	231278	227087
n2846	188.141	4.42165	C10H20O3	FA hydroxy(10:0)	8	Lipids: Fatty Acyls	Fatty Acids and Conjugates	456125	0.858399	1	0	0.0561888	0.373526	0	0.00998615	1.27712	0.12726	0.261187	0.350002	0	0	0.27077	241919	215202	245586	178029	181657	228593	401333	284327	158067	165325	0	0	0	0	0	33619.2	0	11677.8	15604.9	8639.92	116057	95749.5	153454	52347.7	44684.1	0	0
n2941	174.126	7.56255	C9H18O3	FA hydroxy(9:0) hydroxy-nonanoic acid	8	Lipids: Fatty Acyls	Fatty Acids and Conjugates	350771	1.13017	1	0.610152	0.498388	0.930261	0.650518	0.491263	1.08542	0.903575	0.988834	0.891042	0.908436	0.67629	1.02813	137975	180465	214593	181896	185671	96607.9	156939	189668	166057	187599	119384	67267.1	147302	58324.7	93935.5	50339.1	120033	80808.9	48531	97439.1	131742	130701	228685	108547	141622	115560	105444
n3	282.256	3.94211	C18H34O2	FA (18:1)	6	Lipids: Fatty Acyls	Fatty Acids and Conjugates	519085282	1.3342	1	0.201004	0.116096	0.436963	0.1712	0.132656	1.61464	0.385545	0.502872	0.696704	0.387621	0.231241	0.39217	3.21175e+08	3.5951e+08	1.98319e+08	2.90129e+08	2.4761e+08	1.89365e+08	3.34625e+08	2.165e+08	1.4606e+08	1.75313e+08	3.88961e+07	5.17123e+07	5.16721e+07	3.41532e+07	3.70048e+07	1.51614e+07	6.53506e+07	2.01599e+07	1.14793e+07	1.1127e+07	9.44206e+07	9.35059e+07	1.03192e+08	9.41894e+07	7.86872e+07	4.85147e+07	3.64507e+07
n3122	174.126	5.1612	C9H18O3	[FA hydroxy(9:0)] 2-hydroxy-nonanoic acid	8	Lipids: Fatty Acyls	Fatty Acids and Conjugates	219102	1.46523	1	0.257759	0.246296	0.750505	0.243286	0.196898	1.14955	0.853186	0.473899	0.941915	0.786205	0.294181	0.506561	219102	145789	170850	127897	179934	116519	147408	105630	98686	107484	30949.6	26932.5	27793.9	37242.7	25480.1	37576.8	25652	28588	26574.8	23407.6	118273	55243.1	79058.8	82514.2	96996.4	37181.1	29283.8
n318	158.094	5.14209	C8H14O3	FA oxo(8:0) oxo-octanoic acid	6	Lipids: Fatty Acyls	Fatty Acids and Conjugates	201481	1.19804	1	0.540805	0.623972	0.841845	0.57916	0.648925	1.05777	0.834987	1.01769	0.886606	0.952734	0.977362	0.775515	201481	127853	155907	129317	102897	95704.8	145130	135786	113365	108871	84474.1	81761.1	63421.5	56211.2	37997.3	68826.2	87924.7	86535.5	68206.9	62176.9	98898	78703.3	99718	105274	121551	79546.3	60463.5
n464	280.24	3.95337	C18H32O2	FA (18:2)	8	Lipids: Fatty Acyls	Fatty Acids and Conjugates	37794477	1.05612	1	0.597884	1.05882	0.769283	0.66221	1.31141	1.44588	0.965172	1.63966	0.944959	1.01835	0.848659	0.892576	1.3569e+07	1.22856e+07	8.2518e+06	7.0863e+06	8.323e+06	6.25129e+06	1.49698e+07	8.44778e+06	7.74074e+06	9.47516e+06	6.81155e+06	6.71635e+06	7.51941e+06	3.43763e+06	3.54667e+06	5.19148e+06	3.06312e+07	7.12435e+06	3.29394e+06	3.40157e+06	4.45657e+06	6.57543e+06	8.25823e+06	9.57596e+06	7.20144e+06	1.0041e+07	6.26309e+06
n465	278.225	3.96459	C18H30O2	FA (18:3)	6	Lipids: Fatty Acyls	Fatty Acids and Conjugates	10287588	1.26412	1	0.6922	1.20029	0.668752	0.711375	1.4149	1.36791	1.02238	1.6364	0.838204	1.11122	1.02334	0.931385	3.38698e+06	4.41393e+06	2.92392e+06	2.27974e+06	2.74475e+06	1.61132e+06	3.94836e+06	2.18581e+06	2.22248e+06	2.49075e+06	2.07303e+06	2.29207e+06	2.05892e+06	1.14492e+06	1.05499e+06	1.66186e+06	9.10368e+06	2.18785e+06	1.10603e+06	894677	1.13306e+06	1.39743e+06	2.12146e+06	2.02417e+06	1.65568e+06	2.60525e+06	1.86954e+06
n470	330.256	3.90557	C22H34O2	FA (22:5)	6	Lipids: Fatty Acyls	Fatty Acids and Conjugates	1776509	0	1	1.51842	3.15592	0.713895	1.97769	3.47519	1.2211	2.74864	3.74882	1.27289	2.59152	2.49943	2.04769	0	0	0	0	0	0	446706	0	198496	168212	283126	367114	345797	138987	100080	262326	1.67044e+06	281380	167755	185160	0	188344	0	252732	139616	453957	321667
n707	188.141	7.54704	C10H20O3	[FA hydroxy(10:0)] 3-hydroxy-decanoic acid	6	Lipids: Fatty Acyls	Fatty Acids and Conjugates	337364	1.27977	1	0.720521	0.524406	0.852815	0.624422	0.680781	1.08177	0.792961	1.2422	1.01993	1.12565	0.608693	0.987044	105990	149421	168312	128603	120170	112197	108572	115078	48242.7	141390	103795	53371.5	113632	57015.2	50805.4	52829.2	59891.4	64431.2	57005.4	41407.8	138720	50281.4	118424	82144.4	58567.4	52269	61337.4
n85	212.141	4.30558	C12H20O3	FA oxo(12:1)	6	Lipids: Fatty Acyls	Fatty Acids and Conjugates	2616390	1.38488	1	0.200636	0.27969	0.510225	0.216729	0.29753	0.857652	0.208035	0.72828	0.40594	0.233241	0.615595	0.389908	2.61639e+06	1.17086e+06	2.26766e+06	1.15721e+06	1.19088e+06	1.57491e+06	2.54731e+06	416388	850686	678370	218896	379459	216347	245183	157506	255818	329263	359956	557943	194088	562665	825232	374342	692147	641490	282137	389361
n998	130.099	4.95911	C7H14O2	FA methyl(6:0)	6	Lipids: Fatty Acyls	Fatty Acids and Conjugates	1494846	1.26412	1	0.444547	0.380099	0.603313	0.346208	0.438999	0.896805	0.402899	0.659473	0.549617	0.438543	1.01255	0.652295	1.00358e+06	432530	827179	479147	422874	658004	835639	269905	443100	297315	467270	186682	170350	155904	132923	175590	169250	195152	269840	141922	282749	343896	242228	293681	348119	183210	205350
p2206	294.219	4.02049	C18H30O3	FA hydroxy(18:1)	8	Lipids: Fatty Acyls	Fatty Acids and Conjugates	5414628	1.36018	1	0.808748	3.02074	0.797552	1.07118	3.04244	1.28744	1.4549	1.48515	1.08102	1.70369	2.37823	2.45187	762607	831616	1.18765e+06	607067	718741	536229	665753	688796	469053	660116	730425	503153	540743	302262	365795	1.00068e+06	5.41463e+06	1.47807e+06	645841	583245	399479	453378	534641	455874	565193	805593	697386
p2602	266.188	3.93184	C16H26O3	[FA trimethyl(13:2)] tridecadienoic acid	8	Lipids: Fatty Acyls	Fatty Acids and Conjugates	4394937	1.88038	1	0.532069	0.272989	1.23968	0.680613	0.29588	1.43189	0.890111	0.621905	1.57308	1.10033	0.463878	0.851189	1.2894e+06	1.72256e+06	4.39494e+06	2.05217e+06	2.02551e+06	988749	1.33437e+06	935987	998046	1.85042e+06	781796	796184	564976	526143	580552	579257	196516	0	390789	500740	1.59051e+06	1.28825e+06	1.46932e+06	1.57149e+06	1.65187e+06	1.18067e+06	813378
p783	252.209	4.25628	C16H28O2	FA (16:2)	6	Lipids: Fatty Acyls	Fatty Acids and Conjugates	6660945	1.45914	1	0.780758	0.721882	1.01376	0.806481	0.628034	1.34409	1.14884	1.5581	1.21219	1.22685	1.15735	0.726562	2.49557e+06	3.18714e+06	6.66095e+06	3.84819e+06	3.3614e+06	2.24369e+06	2.48058e+06	3.52258e+06	2.48238e+06	2.67131e+06	1.80027e+06	2.1135e+06	2.17574e+06	2.25539e+06	2.11767e+06	1.96822e+06	1.54049e+06	1.45277e+06	2.50332e+06	2.20881e+06	2.78462e+06	1.5817e+06	3.54537e+06	3.44981e+06	2.22348e+06	1.97561e+06	2.33788e+06
n3001	231.147	4.75369	C11H21NO4	O-Butanoylcarnitine	8	Lipids: Fatty Acyls	Fatty acyl carnitines	171102	1.087	1	0.945127	1.20403	0.996685	1.02545	1.13823	0.656258	0.903231	0.62704	1.08016	0.693328	0.924496	1.21368	40708.3	66231.5	70700.1	118896	108032	62943.9	38382.4	124397	78752.1	67711.7	61501.2	73142.4	71528.6	68239.2	77352.2	75362.1	85550	137858	78580	70772.2	53170.5	84832.3	73600.3	80964.5	78385.2	85402.2	73301
n1122	184.183	4.31341	C12H24O	FA (12:1) dodecen-1-ol	6	Lipids: Fatty Acyls	Fatty alcohols	2071504	0	1	2.82326	3.9741	2.53754	3.59343	4.40942	2.24641	4.48562	33.5345	4.1006	5.01339	25.0294	4.81885	0	0	0	0	0	0	53176.3	74204.5	0	123956	93572.5	135531	174488	201230	104768	157336	327830	191724	197272	124675	227164	80284.8	105942	134387	89998.8	188618	133566
p102	276.222	7.60805	C16H33ClO	2-chlorohexadecanol	6	Lipids: Fatty Acyls	Fatty alcohols	4407252	1.42679	1	0.927153	0.803751	0.936687	0.81319	0.788106	1.60247	1.21915	1.61441	1.26565	1.47879	1.12578	0.940746	1.87933e+06	2.91317e+06	2.73791e+06	2.84366e+06	2.68062e+06	1.69044e+06	1.27626e+06	2.33527e+06	1.70374e+06	2.144e+06	1.48442e+06	1.72348e+06	1.55876e+06	1.66599e+06	2.05053e+06	1.35922e+06	1.8116e+06	1.29186e+06	1.62402e+06	1.26738e+06	2.06404e+06	945764	2.26441e+06	1.58657e+06	1.70964e+06	1.30618e+06	1.19152e+06
p542	276.222	5.14614	C16H33ClO	2-chlorohexadecanol	6	Lipids: Fatty Acyls	Fatty alcohols	2094840	1.19703	1	0.787813	0.63792	0.861221	0.689137	0.619984	1.48656	1.2228	1.48237	1.21899	1.47642	0.914721	0.903555	787967	978758	871526	819450	797150	736885	547097	902024	670054	698458	458777	556000	630632	398785	756103	465559	588693	361406	378798	473043	767631	345877	686293	618992	642435	440367	513410
p775	266.261	4.14217	C18H34O	[FA (18:2)] 3Z,13Z-octadecadien-1-ol	6	Lipids: Fatty Acyls	Fatty alcohols	10176278	1.3563	1	0.791614	0.683772	0.961775	0.782526	0.764598	1.3916	1.0622	1.74809	1.16967	1.42472	1.33523	0.823056	4.08851e+06	3.48447e+06	5.71145e+06	2.41809e+06	3.31657e+06	2.99329e+06	2.29945e+06	3.64462e+06	2.26207e+06	2.82336e+06	2.22845e+06	1.95379e+06	2.22069e+06	2.12779e+06	2.56993e+06	2.36307e+06	1.45874e+06	1.55708e+06	2.06102e+06	2.14848e+06	3.58691e+06	1.63994e+06	2.91399e+06	2.18738e+06	3.15855e+06	1.9925e+06	2.13948e+06
n1254	126.104	4.24319	C8H14O	FA (8:1) octenal	6	Lipids: Fatty Acyls	Fatty aldehydes	4839721	1.20571	1	0.801244	0.658273	0.864244	0.676014	0.606517	1.19249	1.02232	1.5088	1.18588	1.01448	1.23084	0.860514	1.80171e+06	2.70192e+06	4.25217e+06	2.46549e+06	2.85558e+06	2.39294e+06	2.56898e+06	2.28901e+06	1.84722e+06	2.57699e+06	1.48227e+06	2.37452e+06	2.08785e+06	1.54818e+06	1.86181e+06	1.75623e+06	1.68825e+06	1.13632e+06	1.70101e+06	1.40362e+06	1.86138e+06	1.24952e+06	2.34861e+06	2.48402e+06	2.14664e+06	1.57937e+06	1.55805e+06
n1706	184.183	7.56514	C12H24O	Dodecylaldehyde	6	Lipids: Fatty Acyls	Fatty aldehydes	1242580	0	1	2.28653	1.9414	2.17214	2.86289	2.28347	1.02498	2.72399	16.9331	2.7119	3.45832	15.41	4.02371	0	0	0	0	0	120995	131437	42887.8	0	0	129204	163856	125456	178076	78665.4	130462	181541	108593	108681	44057.8	159743	132281	164631	129753	55068.7	201586	118646
p2284	208.183	4.28008	C14H24O	FA (14:2) tetradecadienal	8	Lipids: Fatty Acyls	Fatty aldehydes	8215344	1.33099	1	0.784679	0.709566	0.934427	0.747708	0.638283	1.33855	1.17407	1.44382	1.24318	1.19968	1.10518	0.676172	3.17558e+06	3.8932e+06	8.21534e+06	4.40442e+06	4.10633e+06	3.24906e+06	2.8372e+06	5.17402e+06	2.96666e+06	3.65062e+06	1.84413e+06	2.91343e+06	2.97808e+06	3.11381e+06	3.17869e+06	2.69343e+06	1.69774e+06	2.02e+06	3.16186e+06	3.11228e+06	3.78912e+06	1.85692e+06	4.45104e+06	3.51582e+06	3.09239e+06	2.45302e+06	2.50155e+06
p2023	281.272	4.26997	C18H35NO	[FA (18:1)] 9Z-octadecenamide	8	Lipids: Fatty Acyls	Fatty amides	11052429	1.15265	1	0.818847	0.807588	1.08698	0.957761	0.849791	1.60348	1.27323	0.665145	1.11717	1.67878	0.8911	0.89631	5.96298e+06	4.80479e+06	2.84445e+06	3.7423e+06	3.41778e+06	4.57441e+06	4.71334e+06	2.79688e+06	2.91029e+06	3.02643e+06	4.20647e+06	2.31715e+06	2.36086e+06	3.44958e+06	2.42267e+06	1.8237e+06	6.04221e+06	2.70889e+06	1.99682e+06	1.98221e+06	3.86917e+06	3.29709e+06	4.76713e+06	2.83457e+06	4.82096e+06	5.33965e+06	2.63807e+06
p2024	279.256	4.29751	C18H33NO	Linoleamide	6	Lipids: Fatty Acyls	Fatty amides	2738498	1.18374	1	0.804295	0.84248	1.18412	1.12244	0.849657	1.7202	1.21252	0.730778	1.20309	1.86325	1.09268	0.950113	1.61478e+06	1.56984e+06	322660	601728	656132	1.12221e+06	947587	716236	698981	540477	1.01384e+06	468693	555873	779020	420252	467501	1.26423e+06	841531	489736	328397	870456	623279	1.31997e+06	570495	1.38248e+06	1.25537e+06	741838
p2408	171.162	4.45169	C10H21NO	decanamide	6	Lipids: Fatty Acyls	Fatty amides	2774571	1.44698	1	0.317891	0.332265	0.657944	0.320112	0.37416	0.978662	0.357992	0.881411	0.585987	0.373858	0.61278	0.447276	2.77457e+06	1.40193e+06	1.98467e+06	1.13157e+06	1.01252e+06	1.42898e+06	1.91858e+06	493420	960396	938348	446704	421655	321403	356922	277923	280588	371025	404896	604492	246107	686656	947190	614145	694825	833603	304294	537590
p2615	299.282	4.32102	C18H37NO2	[FA (16:2)] N-hexadecyl-ethanolamine	8	Lipids: Fatty Acyls	Fatty amides	4128481	1.0157	1	0.539789	0.122015	1.08667	0.695902	0.122125	1.2594	0.667961	0.655431	1.2597	0.906275	0.668683	0.545633	2.22305e+06	2.4838e+06	2.21419e+06	2.55778e+06	2.43392e+06	2.15086e+06	2.43866e+06	2.12473e+06	2.1194e+06	2.89499e+06	1.2078e+06	1.36486e+06	1.27517e+06	1.09842e+06	1.38474e+06	209193	568243	235208	227280	191141	3.18136e+06	1.91896e+06	2.3937e+06	2.59191e+06	2.65918e+06	1.59207e+06	1.68006e+06
p2617	325.298	4.23103	C20H39NO2	[FA (18:0)] N-(9Z-octadecenoyl)-ethanolamine	6	Lipids: Fatty Acyls	Fatty amides	2091330	1.14036	1	0.450546	0.316713	0.956816	0.516913	0.310365	1.21403	0.638642	0.977141	1.11555	0.715022	0.922607	0.539817	1.61399e+06	1.67226e+06	1.2042e+06	1.70531e+06	1.47982e+06	1.21806e+06	1.31287e+06	1.41604e+06	1.23667e+06	1.5472e+06	581304	599334	775097	548405	528413	344768	568492	432864	381084	404535	1.48409e+06	1.02685e+06	1.39638e+06	1.29729e+06	1.23556e+06	626492	795349
p2776	283.288	4.26665	C18H37NO	Octadecanamide	6	Lipids: Fatty Acyls	Fatty amides	1648559	0.885055	1	0.41637	0.252115	0.589956	0.345771	0.286882	0.990566	0.509431	0.601398	0.925491	0.566622	0.570204	0.485311	1.18501e+06	967284	867641	968389	1.3875e+06	1.04594e+06	851892	1.06294e+06	1.64856e+06	1.46467e+06	552557	404657	419014	682985	469818	175069	430067	258057	398576	269578	920728	599021	682179	612293	769169	573853	319522
n2273	102.068	5.16442	C5H10O2	ethyl propionate	8	Lipids: Fatty Acyls	Fatty esters	1958387	1.03184	1	0.805504	0.549935	0.811263	0.969179	0.635682	0.907614	1.38713	0.642979	0.766073	1.33718	0.599792	0.509421	1.61992e+06	599041	1.24787e+06	866632	1.28222e+06	1.42776e+06	1.5785e+06	669117	1.14891e+06	618131	718103	764634	927219	985219	988708	745452	471419	648860	629626	497618	1.06643e+06	667132	801408	1.00358e+06	876677	1.24356e+06	1.08173e+06
n321	160.074	5.1481	C7H12O4	Dihydro-3-hydroxy-3-(1-hydroxyethyl)-4-methylfuran-2(3H)-one	6	Lipids: Fatty Acyls	Fatty esters	151239	1.06132	1	0.8634	0.65112	0.950688	0.683276	0.701136	1.17765	1.28988	1.04074	1.10338	1.06877	0.904698	0.723523	124015	88573.9	123013	112836	74354.8	106644	48917.7	100397	139314	97314.2	81531.1	89158	101959	60181.4	92470.3	64998.4	70224.8	54167.3	67736	63606.6	89210.8	34151.8	133225	112016	99693.7	77909.7	67738.1
p226	190.172	4.24389	C14H22	3,5,7-Trimethyl-2E,4E,6E,8E-undecatetraene	6	Lipids: Fatty Acyls	Hydrocarbons	57022846	1.66712	1	0.837631	0.592942	0.824399	0.672712	0.492728	1.3264	1.12341	1.24082	1.45895	1.01133	0.759628	0.752712	1.16568e+07	2.28307e+07	5.70228e+07	1.94624e+07	2.39192e+07	1.8876e+07	1.55145e+07	1.14189e+07	1.42272e+07	2.08768e+07	9.26788e+06	1.668e+07	1.54062e+07	1.03277e+07	1.60936e+07	9.7861e+06	8.11702e+06	7.35847e+06	1.1944e+07	1.07713e+07	1.40353e+07	5.57977e+06	1.93557e+07	1.22917e+07	1.54424e+07	6.39053e+06	1.19233e+07
n323	104.047	5.17051	C4H8O3	2S-hydroxy-butanoic acid	6	Lipids: Fatty Acyls	Hydroxy fatty acids [FA0105]	128736	1.1885	1	0.760969	0.575806	0.812223	0.779674	0.688221	1.14383	0.953428	0.990453	1.19499	1.03542	0.769934	0.630406	128736	76944.7	66960	106818	127160	95043.5	78904.9	104978	80993.7	66346.4	65042.5	63104.8	72945	67547.4	55735.9	59355.9	51094.4	54872.2	44925.2	35199.1	73988.3	44692.1	59728.8	75565.4	92248.8	54674.9	79800.4
p3802	217.131	5.05813	C10H19NO4	O-Propanoylcarnitine	8	Lipids: Fatty Acyls	OxidationofBranchedFattyAcids	187772	1.03408	1	0.782713	0.75931	1.07648	0.82065	0.759515	0.705879	0.465786	0.769761	0.89235	0.685588	0.900444	0.646321	142267	107222	187772	106657	116311	94800.4	141320	154294	128422	119636	74954.2	104196	114318	91064.6	115208	105917	64072.4	117456	92807.4	104546	141580	124171	155409	131499	134644	93017.3	95016.9
n1131	170.167	4.35636	C11H22O	2-Undecanone	6	Lipids: Fatty Acyls	Oxygenated hydrocarbons	477959	0	0	0	0	0	0	0	0	0	352.451	0	0	273.888	0	0	0	0	0	0	0	0	0	0	0	0	0	0	0	0	0	0	0	0	0	0	0	0	0	0	0	0
n1270	100.089	4.25605	C6H12O	[FA (6:0)] hexanal	6	Lipids: Fatty Acyls	superpathway of lipoxygenase __ 13-LOX and 13-HPL pathway	1004999	1.53773	1	0.941473	0.636865	0.778812	0.755869	0.562774	1.35839	1.03209	1.45666	1.3659	0.816347	1.05419	0.862001	456066	574984	1.005e+06	424885	571565	441508	493952	237857	357783	440956	357096	520285	396195	278010	305051	302370	269577	185296	250412	248279	383566	180417	376792	300206	294881	216564	301277
p1355	287.246	4.27867	C16H33NO3	Lauroyl diethanolamide	8	Lipids: Fatty Acyls	Undefined	37139614	1.05442	1	0.673244	1.09591	1.40295	1.11114	1.04301	1.57406	1.32435	2.19665	0.91085	1.57384	2.27047	0.897247	1.19771e+07	7.55549e+06	1.36046e+07	1.46693e+07	7.51861e+06	4.15049e+06	6.62361e+06	2.77941e+07	8.51555e+06	5.3858e+06	6.86375e+06	6.06766e+06	5.72877e+06	1.25429e+07	4.1218e+06	1.33699e+07	1.03254e+07	9.20574e+06	1.38796e+07	1.07216e+07	1.39126e+07	1.25575e+07	1.60614e+07	2.10179e+07	1.00629e+07	1.57914e+07	1.11612e+07
p410	548.48	3.69072	C35H64O4	Cohibin A	6	Lipids: Fatty Acyls	Undefined	8764454	0.937982	1	1.36629	0.630077	1.62899	1.61891	0.632696	1.32018	1.94708	0.960853	1.94126	2.50966	1.12757	1.27397	2.51307e+06	2.47095e+06	3.52781e+06	2.91944e+06	2.78315e+06	3.2568e+06	2.77805e+06	2.69607e+06	3.18339e+06	3.23994e+06	4.45248e+06	4.00121e+06	3.69381e+06	4.53119e+06	4.0264e+06	1.6082e+06	2.20293e+06	1.816e+06	1.79385e+06	2.12736e+06	5.30902e+06	3.62233e+06	5.07981e+06	5.67212e+06	5.00284e+06	4.62196e+06	4.4433e+06
p575	335.319	4.19508	C22H41NO	Pipericine	6	Lipids: Fatty Acyls	Undefined	4817013	1.17691	1	0.930323	1.11739	0.827506	1.01731	0.932386	1.39756	1.256	1.8219	1.27833	1.49679	3.34459	1.36285	824081	531776	697815	650803	561861	416167	366142	1.26723e+06	526144	199653	514826	504472	829682	399244	333740	277361	1.14172e+06	475495	406046	800507	225401	381185	584163	638200	467662	429256	406897
p2803	550.495	3.79434	C35H66O4	DG(P-32:1)	8	Lipids: Glycerolipids	Diradylglycerols	2644168	1.28956	1	0.666278	0.39638	0.819858	0.660602	0.411537	1.49917	0.867532	0.604204	1.03842	0.999778	0.677917	0.61765	2.33512e+06	2.23076e+06	2.11305e+06	1.78017e+06	1.60553e+06	2.04048e+06	1.74709e+06	1.67862e+06	1.629e+06	709498	863744	1.34526e+06	890742	1.0364e+06	1.06395e+06	713523	481855	538759	693913	665576	1.42686e+06	1.04925e+06	1.40174e+06	1.25613e+06	1.26475e+06	1.13797e+06	902018
p804	712.6	4.20361	C46H80O5	DG(43:5)	6	Lipids: Glycerolipids	Diradylglycerols	2144489	1.27766	1	0.658576	0.877538	0.964719	0.838088	0.871948	1.34753	1.17149	1.55058	1.20889	1.43429	1.262	0.766248	1.03979e+06	1.25041e+06	1.80441e+06	1.04714e+06	1.15365e+06	964602	844423	1.21271e+06	849500	1.05605e+06	385067	638734	734368	743324	743495	847233	773893	767847	910205	1.0247e+06	1.04053e+06	666384	1.20434e+06	765288	1.0769e+06	645692	881911
n20	358.308	4.13528	C21H42O4	MG(18:0/0:0/0:0)	6	Lipids: Glycerolipids	Monoradylglycerols	16360950	1.0376	1	0.763148	0.678978	0.833091	0.74894	0.69011	1.18603	0.93604	1.50211	1.07123	1.18762	1.61055	0.771501	8.08852e+06	5.99617e+06	6.4717e+06	6.62138e+06	7.04634e+06	8.24494e+06	5.77754e+06	8.07014e+06	5.22488e+06	5.66649e+06	5.40736e+06	6.33529e+06	5.85071e+06	3.91811e+06	3.66021e+06	4.21113e+06	5.14954e+06	4.37649e+06	4.35443e+06	4.30381e+06	6.60092e+06	3.78248e+06	5.79218e+06	5.24808e+06	6.05499e+06	5.30984e+06	4.72498e+06
p2403	358.308	5.48643	C21H42O4	MG(18:0/0:0/0:0)	8	Lipids: Glycerolipids	Monoradylglycerols	5631367	0.828583	1	0.730116	0.519444	0.720951	0.633621	0.527961	1.00546	0.704096	1.24826	1.05737	0.965145	1.60634	0.485109	1.72917e+06	2.08126e+06	955136	2.14433e+06	2.04735e+06	2.77132e+06	2.38147e+06	2.57469e+06	1.50053e+06	1.58231e+06	1.78357e+06	2.05893e+06	1.65978e+06	1.23124e+06	1.15926e+06	1.26992e+06	1.47712e+06	942843	921774	1.00369e+06	1.76382e+06	1.09889e+06	1.92381e+06	1.6628e+06	1.34439e+06	1.40881e+06	1.32009e+06
p800	356.293	4.23339	C21H40O4	MG(0:0/18:1(11Z)/0:0)	6	Lipids: Glycerolipids	Monoradylglycerols	2586658	1.15484	1	0.775996	0.614804	0.830404	0.668227	0.649968	1.17996	1.02214	1.39805	1.06004	1.39578	1.36409	0.764627	1.78324e+06	1.10437e+06	1.45798e+06	1.02343e+06	962499	1.05311e+06	1.07808e+06	1.66615e+06	744582	940697	783192	722210	1.35688e+06	637114	755094	681727	824094	539796	580890	744225	900894	573421	1.21217e+06	1.02064e+06	845655	882813	672083
n3058	266.064	11.6089	C9H14O9	Monoglyceride citrate	8	Lipids: Glycerolipids	Undefined	170309	0.942	1	1.0173	0.749681	0.98819	1.03909	0.763652	0.90256	0.979588	0.551577	0.939576	0.849582	0.486164	0.816421	122723	151869	143966	135098	136883	156281	144039	137110	151025	144600	170309	141693	160587	136213	136938	124063	106512	98310.5	102928	117744	153881	105879	158933	154680	151025	163777	158672
p3096	717.53	7.21452	C39H76NO8P	1-pentadecanoyl-2-(9Z-hexadecenoyl)-sn-glycero-3-phosphocholine	8	Lipids: Glycerophospholipids	Diacylglycerophosphocholines [GP0101]	1498937	0.892931	1	0.795662	0.397211	0.949729	0.847245	0.41494	1.23571	1.1833	0.913852	1.10691	1.37747	0.939614	0.768277	760513	901963	181839	767611	850075	876207	954946	668541	638888	738538	675258	746005	548101	591039	524477	288769	392264	299887	291814	267299	744457	598955	683635	878834	776334	687691	535326
n1124	436.259	4.31047	C21H41O7P	PA(18:1(9Z)/0:0)	6	Lipids: Glycerophospholipids	Glycerolipid metabolism__Glycerophospholipid metabolism	1518940	1.10731	1	0.800874	1.27869	0.768029	0.969381	1.1431	0.9084	1.39875	3.93326	1.0267	1.96777	2.23354	1.3387	215785	179727	329514	171954	250897	129974	194413	134919	200058	377268	130756	188410	174499	147289	189258	149849	412816	259501	297271	206093	141498	109096	151724	197384	196463	205966	257539
n1737	410.243	4.39084	C19H39O7P	LysoPA(16:0)	6	Lipids: Glycerophospholipids	Glycerophosphates	2326521	1.27819	1	0.931849	1.14629	1.03463	1.03423	1.23737	1.28295	1.53171	2.34319	1.22013	2.32536	1.63153	1.37678	1.13646e+06	914580	868627	621700	658558	632025	806591	503099	618562	725552	513558	680283	615739	656169	596148	599894	925064	618985	883122	739435	668777	543457	559829	692127	935417	638826	767170
n1816	646.457	3.79635	C35H67O8P	PA(32:1)	8	Lipids: Glycerophospholipids	Glycerophosphates	3649790	0.743421	1	1.07303	0.171351	0.583	0.812197	0.150672	0.708791	0.922335	0.529996	0.469864	0.806688	0.490386	0.539469	1.88203e+06	2.20641e+06	1.90574e+06	2.69956e+06	2.45324e+06	3.32845e+06	2.91665e+06	2.74253e+06	3.5594e+06	2.44711e+06	2.73884e+06	3.55578e+06	3.59222e+06	3.4512e+06	2.75115e+06	429135	620779	533865	497638	487839	1.87317e+06	1.39252e+06	1.70296e+06	2.02367e+06	1.74927e+06	2.32633e+06	2.27511e+06
n1927	648.472	3.79219	C35H69O8P	PA(32:0)	6	Lipids: Glycerophospholipids	Glycerophosphates	1734846	0.69159	1	1.04876	1.55098	0.313938	1.01776	1.69633	1.06963	0.726911	0.57242	0.450005	0.715282	0.861923	0.964802	562789	630068	571661	347523	306835	746787	812524	483451	890166	564629	639543	806186	625507	871365	725486	1.10411e+06	1.15029e+06	898895	1.31756e+06	953777	0	264180	191826	321264	320746	694862	483611
n2036	672.473	3.77914	C37H69O8P	PA(34:2)	8	Lipids: Glycerophospholipids	Glycerophosphates	3939449	1.02593	1	0.648279	0.223973	0.565585	0.547758	0.227194	1.07304	1.02382	1.11808	0.562729	1.19464	0.707605	0.619417	1.10518e+06	2.10545e+06	1.51721e+06	2.48304e+06	2.39583e+06	1.79886e+06	1.81181e+06	1.9306e+06	2.04159e+06	1.78106e+06	1.29072e+06	1.35191e+06	1.23027e+06	1.09654e+06	1.10099e+06	361346	625035	367839	377628	365413	1.09965e+06	864452	948032	1.24534e+06	1.13861e+06	1.24779e+06	1.08806e+06
n2305	644.441	3.8107	C35H65O8P	PA(32:2)	8	Lipids: Glycerophospholipids	Glycerophosphates	1678839	1.11208	1	0.409288	0.080159	0.421731	0.348945	0.059997	0.919972	0.525428	0.391572	0.388048	0.499199	0.322336	0.401119	1.03918e+06	1.30806e+06	1.25959e+06	1.67884e+06	1.43149e+06	1.18427e+06	1.21678e+06	1.14763e+06	1.18188e+06	1.30959e+06	442403	516786	511399	566883	434689	65267.2	83095.4	101044	88013	146753	424107	497607	537670	611261	476679	473416	383736
n2699	410.243	7.5545	C19H39O7P	[PA(16:0/0:0)] 1-hexadecanoyl-2-sn-glycero-3-phosphate	8	Lipids: Glycerophospholipids	Glycerophosphates	673720	1.02056	1	0.94675	0.963077	0.919552	0.982021	0.972804	1.13924	1.24943	1.32144	1.26186	1.89353	0.935743	1.36376	437623	334867	240464	201230	204190	332749	426359	143941	218244	268505	289311	300960	280450	218625	226445	243422	347275	237690	278958	231137	245922	280336	233555	270399	247778	227653	297730
n38	674.489	3.77407	C37H71O8P	PA(34:1)	6	Lipids: Glycerophospholipids	Glycerophosphates	10091716	0.762739	1	1.36337	0.325791	0.685731	1.08671	0.322663	0.961074	1.60236	0.9779	0.666687	1.58176	0.803173	0.808193	2.9372e+06	3.07825e+06	2.74714e+06	4.50696e+06	4.38564e+06	5.27671e+06	4.19417e+06	4.18569e+06	4.79053e+06	4.69997e+06	6.3624e+06	7.12949e+06	6.12416e+06	5.92927e+06	6.01265e+06	1.21612e+06	2.06101e+06	1.46524e+06	1.50001e+06	1.29873e+06	3.60442e+06	2.43815e+06	2.69188e+06	4.16072e+06	2.97751e+06	5.4631e+06	4.22607e+06
n429	576.379	3.58666	C30H57O8P	PA(27:1)	6	Lipids: Glycerophospholipids	Glycerophosphates	16719277	1.00236	1	1.10559	13.147	1.32244	1.20193	14.6807	1.3656	1.69405	31.5548	2.10475	3.05345	27.0556	6.55986	295486	287470	123994	445388	369748	375422	352128	336241	205484	249234	251548	381017	376686	337925	331673	5.55906e+06	2.93573e+06	4.24508e+06	3.9356e+06	3.28842e+06	483921	297405	359068	439082	428657	401507	327558
n440	562.363	3.58204	C29H55O8P	PA(26:1)	6	Lipids: Glycerophospholipids	Glycerophosphates	6293182	1.10486	1	0.889444	7.23307	1.88409	1.36915	8.43446	1.27844	1.2285	25.6526	3.10587	2.89915	21.2518	4.63665	190881	148740	53539.2	147858	208273	151292	149479	167312	111307	98787.6	106574	135793	145901	115034	99901.4	1.1772e+06	768755	1.15428e+06	978263	826820	388037	176974	238660	233468	240612	170402	269269
n443	590.394	3.58566	C31H59O8P	PA(28:1)	6	Lipids: Glycerophospholipids	Glycerophosphates	4716011	0.27031	1	3.3775	44.7055	2.03966	3.33899	48.6439	1.6134	6.17348	65.2432	2.30119	8.53182	63.9416	20.3946	0	0	0	0	57865.8	0	133465	0	0	80606.4	114134	180642	154360	147576	126314	2.43485e+06	1.53214e+06	1.80617e+06	2.03094e+06	1.76608e+06	100535	0	83941.4	204462	47694.8	172478	132987
p115	519.332	7.55478	C26H50NO7P	PC(18:2)	6	Lipids: Glycerophospholipids	Glycerophosphocholines	2471491	0.42115	1	1.09571	1.3917	0.882505	0.934299	1.72316	1.05626	1.41009	0.239093	1.10086	1.41091	0.50111	1.22491	306413	512370	398667	0	0	397688	750320	535992	609881	596892	797067	915260	792459	297250	365408	465190	2.18113e+06	750647	291284	334826	252166	450538	482439	515857	850123	764701	647716
p1272	717.53	4.47683	C39H76NO8P	PC(31:1)	8	Lipids: Glycerophospholipids	Glycerophosphocholines	48402434	0.98877	1	0.812124	0.491849	0.93532	0.864605	0.510645	1.29054	1.15069	0.795938	1.20294	1.3685	0.63341	0.818737	3.22584e+07	3.03935e+07	1.78729e+07	2.86306e+07	3.21385e+07	3.11999e+07	2.98718e+07	2.81466e+07	2.47022e+07	2.89782e+07	2.49896e+07	2.38798e+07	2.06513e+07	2.29425e+07	2.35883e+07	1.35709e+07	1.43721e+07	1.38165e+07	1.47873e+07	1.37378e+07	2.76717e+07	1.89342e+07	2.82606e+07	2.96532e+07	2.91363e+07	2.33035e+07	2.2697e+07
p1314	467.301	5.07022	C22H46NO7P	[LysoPC(14:0)] 1-tetradecanoyl-sn-glycero-3-phosphocholine	6	Lipids: Glycerophospholipids	Glycerophosphocholines	9936429	0.445802	1	1.0939	2.25334	1.06484	1.26345	2.42658	1.40569	1.90376	1.53775	1.48922	2.08263	1.58493	1.37946	615944	798824	777271	478120	531891	886983	1.84204e+06	1.30311e+06	1.31467e+06	1.83587e+06	2.07132e+06	1.98372e+06	1.93064e+06	902640	968789	1.8527e+06	9.786e+06	2.33404e+06	1.09069e+06	1.12158e+06	964954	1.1927e+06	1.57249e+06	1.96227e+06	1.95597e+06	2.81272e+06	1.98377e+06
p1419	451.271	7.56676	C21H42NO7P	PC(O-13:1)	6	Lipids: Glycerophospholipids	Glycerophosphocholines	7273496	1.15295	1	0.400036	0.188392	1.02665	0.4652	0.171299	1.26937	0.492258	0.375533	1.48335	0.602934	0.357692	0.640588	3.82366e+06	4.25366e+06	5.95559e+06	3.91268e+06	3.46474e+06	3.04925e+06	4.50016e+06	3.94003e+06	2.83121e+06	4.24938e+06	1.54223e+06	1.36181e+06	1.59976e+06	1.31252e+06	1.61234e+06	636731	640241	786268	575544	859656	3.87032e+06	2.38773e+06	5.0338e+06	4.02405e+06	3.74894e+06	2.29178e+06	1.57283e+06
p1611	523.364	4.79089	C26H54NO7P	LysoPC(18:0)	8	Lipids: Glycerophospholipids	Glycerophosphocholines	13060356	1.14817	1	0.681076	0.824032	0.839689	0.761118	0.907145	1.2262	0.901193	0.981173	1.08806	1.05448	1.07466	0.856124	7.57787e+06	7.32038e+06	1.12222e+07	5.10585e+06	6.7718e+06	4.50514e+06	8.81843e+06	5.95073e+06	6.18679e+06	7.63337e+06	5.69218e+06	5.37661e+06	4.80067e+06	3.27611e+06	3.39427e+06	3.21458e+06	1.30604e+07	4.68902e+06	3.2517e+06	3.05522e+06	4.02457e+06	5.16582e+06	5.92528e+06	6.7065e+06	5.96687e+06	6.4568e+06	4.90382e+06
p1746	703.515	3.93471	C38H74NO8P	PC(30:1)	8	Lipids: Glycerophospholipids	Glycerophosphocholines	9704851	0.902887	1	0.720209	1.98973	0.945978	0.791723	2.14167	1.22871	0.88959	1.73771	1.0817	0.978049	2.21738	0.847482	3.48687e+06	3.72231e+06	209743	2.52893e+06	3.07444e+06	2.42006e+06	4.6526e+06	2.28939e+06	2.30011e+06	2.76079e+06	2.48018e+06	2.37801e+06	2.37079e+06	1.75913e+06	1.39943e+06	6.26322e+06	6.57741e+06	5.47346e+06	5.17584e+06	5.20787e+06	2.49519e+06	2.4549e+06	3.02505e+06	3.10382e+06	2.56483e+06	2.63508e+06	2.41286e+06
p2007	731.548	4.14049	C40H78NO8P	PC(32:1)	8	Lipids: Glycerophospholipids	Glycerophosphocholines	6465317	0.931383	1	1.04907	4.7162	0.803647	1.07585	4.97754	1.17641	1.5156	6.13062	1.01798	2.19191	8.43722	2.12741	741856	563629	296628	506655	743249	597755	673034	649787	488232	653325	574758	820462	763000	575313	478846	3.38151e+06	1.97602e+06	2.75383e+06	3.1422e+06	3.18809e+06	527392	297223	450947	563252	622059	982294	581636
p2008	729.53	4.15245	C40H76NO8P	PC(32:2)	6	Lipids: Glycerophospholipids	Glycerophosphocholines	5164764	0.656572	1	0.696936	4.97176	0.911715	0.542335	6.39905	1.31546	1.14823	11.9745	0.813932	1.84143	9.82374	2.76837	0	220134	0	158617	402420	256446	294440	364280	188254	86352.4	197817	142124	154770	163692	170792	1.45956e+06	972745	1.22834e+06	1.23543e+06	1.01918e+06	314935	133349	245511	191467	199471	113807	103850
p2072	341.197	5.13227	C14H32NO6P	[PC(6:2)] 1-hexyl-sn-glycero-3-phosphocholine	6	Lipids: Glycerophospholipids	Glycerophosphocholines	2054545	0.775126	1	1.0094	0.710797	1.01819	0.950986	0.637429	0.724754	0.865132	0.805547	0.771167	0.684438	0.859445	0.614511	882738	1.19204e+06	1.53828e+06	1.25154e+06	1.09649e+06	1.44619e+06	1.27828e+06	1.35994e+06	2.05455e+06	1.55151e+06	1.73383e+06	1.46113e+06	1.45098e+06	1.52964e+06	1.58718e+06	1.22721e+06	840141	1.00062e+06	1.18295e+06	1.21544e+06	1.35303e+06	1.58575e+06	1.51182e+06	1.65486e+06	1.72486e+06	1.46637e+06	1.4925e+06
p2543	465.286	4.86319	C22H44NO7P	[LysoPC(14:1)] 1-(9Z-tetradecenoyl)-sn-glycero-3-phosphocholine	8	Lipids: Glycerophospholipids	Glycerophosphocholines	3132299	0.845289	1	1.1418	5.9928	1.12466	1.17185	6.60536	1.61944	1.69454	10.5164	1.50079	2.03613	10.202	2.56766	80006.1	77931.2	188759	167049	133732	70262.3	159642	223760	130874	181445	237441	142363	187964	128853	177977	598700	590821	939259	1.00099e+06	1.46062e+06	197905	130904	173642	204435	154583	194692	221956
p3005	439.27	4.90378	C20H42NO7P	LysoPC(12:0)	8	Lipids: Glycerophospholipids	Glycerophosphocholines	971067	0	0	98.2244	596.407	0	104.554	699.043	0	148.229	161.421	0	108.09	217.78	174.063	0	0	0	0	0	0	0	0	0	0	100469	135780	54099.7	107832	92941.4	509651	878517	425626	592002	576237	0	0	0	0	0	129122	84378.1
p413	495.333	4.91416	C24H50NO7P	LysoPC(16:0)	8	Lipids: Glycerophospholipids	Glycerophosphocholines	83837284	0.724371	1	0.923357	1.36259	0.95677	1.09823	1.69337	1.26042	1.41544	1.00529	1.17964	1.56012	1.13602	0.942525	1.16502e+07	1.47213e+07	1.64596e+07	1.03225e+07	1.08457e+07	1.18792e+07	2.2339e+07	1.69267e+07	1.52641e+07	2.19425e+07	2.09603e+07	2.01337e+07	1.85005e+07	1.04168e+07	1.15687e+07	1.23369e+07	6.92993e+07	1.84884e+07	9.41622e+06	1.08466e+07	1.12668e+07	1.54605e+07	1.72582e+07	2.07907e+07	1.97559e+07	2.73285e+07	1.81808e+07
p414	521.348	4.82127	C26H52NO7P	LysoPC(18:1)	6	Lipids: Glycerophospholipids	Glycerophosphocholines	38335337	0.84789	1	0.804541	1.23603	0.895706	0.956865	1.32814	1.25612	1.13642	1.07988	1.11006	1.29919	1.18593	0.894632	9.66263e+06	8.80009e+06	1.28007e+07	6.99937e+06	8.27661e+06	6.27337e+06	1.54507e+07	9.70867e+06	1.04257e+07	1.303e+07	1.11525e+07	9.51056e+06	1.14338e+07	5.7047e+06	6.35845e+06	6.84401e+06	3.83353e+07	1.03474e+07	6.40199e+06	5.91488e+06	6.22004e+06	8.79728e+06	1.04374e+07	1.25913e+07	1.11178e+07	1.50352e+07	1.02888e+07
p420	493.317	4.95284	C24H48NO7P	LysoPC(16:1)	6	Lipids: Glycerophospholipids	Glycerophosphocholines	3926712	0.558541	1	0.993485	1.91027	1.04056	1.27908	2.36073	1.40165	1.6453	1.36392	1.45101	1.8469	1.53319	1.17017	263068	353233	381578	312069	313593	303081	753483	560879	555193	734119	756767	725089	710553	356804	338605	599258	3.23693e+06	848931	415720	451853	394994	466078	667278	756297	740006	1.05629e+06	768596
p429	481.353	4.97546	C24H52NO6P	LysoPC(O-16:0)	6	Lipids: Glycerophospholipids	Glycerophosphocholines	595545	1.19053	1	0.761769	1.02805	0.857389	0.81031	1.15937	1.19416	1.04391	1.11587	1.1589	1.24709	1.09587	0.886075	241871	264207	309483	244982	261548	163733	299661	232274	181222	233614	230261	164856	203382	122910	124538	139144	550854	189954	161585	100122	140975	152998	172746	275247	210168	227694	166029
p98	521.348	7.54468	C26H52NO7P	PC(18:1)	6	Lipids: Glycerophospholipids	Glycerophosphocholines	5358323	1.10362	1	1.01646	1.04841	0.865001	0.893921	1.26609	1.06164	1.17486	0.842759	1.07506	1.33846	0.799887	1.15459	2.10719e+06	2.41782e+06	2.37584e+06	1.28399e+06	1.35978e+06	1.4141e+06	2.46709e+06	1.58421e+06	1.31739e+06	1.86571e+06	2.53662e+06	2.14998e+06	1.82296e+06	1.03534e+06	1.24597e+06	1.00056e+06	4.67086e+06	1.71607e+06	799806	879862	1.17243e+06	1.25089e+06	1.93896e+06	1.69407e+06	1.42461e+06	1.99987e+06	1.48398e+06
n1225	439.27	7.5905	C20H42NO7P	LysoPE(15:0)	6	Lipids: Glycerophospholipids	Glycerophosphoethanolamines	525319	0	0	28.8711	301.309	0	28.9571	370.517	0	36.1554	8.19712	0	7.95466	84.2302	121.391	0	0	0	0	0	0	0	0	0	0	37260.1	36607.5	0	35968.7	34519.4	309655	429508	174041	313220	280121	0	0	0	0	0	41951.6	27039.5
n1456	453.286	4.93528	C21H44NO7P	LysoPE(16:0)	8	Lipids: Glycerophospholipids	Glycerophosphoethanolamines	10162483	1.13177	1	0.566823	0.336643	0.937443	0.488152	0.353019	1.47562	0.989488	0.383549	1.53047	1.39455	0.371519	0.583544	5.59562e+06	5.71437e+06	5.86283e+06	4.95051e+06	5.59731e+06	4.62464e+06	5.78077e+06	5.04343e+06	4.07177e+06	4.97263e+06	2.88507e+06	3.04763e+06	3.14175e+06	2.36194e+06	2.44695e+06	923552	4.09843e+06	1.43245e+06	830758	960292	5.03538e+06	4.38373e+06	4.35137e+06	4.77494e+06	4.41559e+06	2.8466e+06	2.57726e+06
n2108	687.484	4.09803	C37H70NO8P	PE(32:2)	8	Lipids: Glycerophospholipids	Glycerophosphoethanolamines	2670091	0.884191	1	0.583529	0.45211	1.67819	0.832063	0.49471	0.889254	0.550386	0.814255	1.61918	0.835946	0.730191	0.690218	1.00643e+06	978464	1.00244e+06	982096	1.24177e+06	1.31992e+06	1.47316e+06	1.20371e+06	999099	897856	762103	644764	637967	690957	703380	533315	618828	567835	440009	504633	2.17946e+06	1.80409e+06	2.07375e+06	2.02128e+06	1.81223e+06	857852	1.0594e+06
n9	743.547	4.04077	C41H78NO8P	PE(36:2)	6	Lipids: Glycerophospholipids	Glycerophosphoethanolamines	13776430	1.11715	1	0.362663	0.255298	0.552468	0.283273	0.236733	1.34471	0.41918	0.572888	0.727103	0.436865	0.443953	0.40106	7.64e+06	8.76677e+06	4.6645e+06	8.5883e+06	8.27076e+06	6.19298e+06	9.88558e+06	7.01832e+06	5.42037e+06	5.43543e+06	2.33261e+06	2.33452e+06	2.94291e+06	2.48637e+06	2.21696e+06	1.80863e+06	2.06689e+06	1.52333e+06	1.5678e+06	1.7014e+06	3.91677e+06	3.12504e+06	4.37033e+06	3.72034e+06	3.62529e+06	1.8175e+06	1.97811e+06
p1007	479.301	4.80225	C23H46NO7P	LysoPE(18:1)	8	Lipids: Glycerophospholipids	Glycerophosphoethanolamines	65580461	1.14835	1	0.500088	0.318312	1.13065	0.514548	0.309845	1.62269	0.686189	0.730719	1.4732	0.793217	0.742063	0.696716	2.68454e+07	2.76587e+07	6.32889e+07	4.25009e+07	3.59573e+07	2.4031e+07	3.11745e+07	3.8999e+07	3.15743e+07	4.5119e+07	1.78038e+07	1.65998e+07	1.98552e+07	1.38325e+07	1.73726e+07	7.75645e+06	1.36853e+07	9.47478e+06	1.08186e+07	1.26637e+07	3.47048e+07	2.99381e+07	4.31531e+07	4.32723e+07	4.2157e+07	2.13375e+07	1.72056e+07
p1417	479.301	7.5553	C23H46NO7P	PE(18:1)	8	Lipids: Glycerophospholipids	Glycerophosphoethanolamines	36405179	1.19091	1	0.512856	0.268673	1.0902	0.509784	0.267227	1.43912	0.640709	0.474255	1.44899	0.806342	0.478915	0.744223	1.9331e+07	2.19004e+07	2.72119e+07	2.58492e+07	2.10246e+07	1.62641e+07	1.981e+07	1.94914e+07	1.74823e+07	2.3783e+07	1.07825e+07	1.04938e+07	1.18478e+07	6.90301e+06	9.6331e+06	3.65889e+06	5.55575e+06	5.5095e+06	4.73478e+06	6.55694e+06	2.15783e+07	1.49325e+07	2.68746e+07	2.10156e+07	2.11636e+07	1.06375e+07	1.03514e+07
p1467	715.515	4.0736	C39H74NO8P	PE(34:2)	8	Lipids: Glycerophospholipids	Glycerophosphoethanolamines	35405745	1.04528	1	0.597704	0.423717	0.938802	0.546206	0.422628	1.16559	0.662647	0.697836	1.11125	0.622923	0.806409	0.528429	2.59008e+07	2.62917e+07	1.68696e+07	2.83689e+07	2.7378e+07	2.59823e+07	2.609e+07	2.3066e+07	2.00609e+07	2.42035e+07	1.62163e+07	1.50455e+07	1.31082e+07	1.30785e+07	1.3919e+07	1.09765e+07	9.91415e+06	1.01765e+07	1.00148e+07	9.51112e+06	2.31547e+07	1.73164e+07	2.41573e+07	2.46679e+07	2.27993e+07	1.36981e+07	1.12438e+07
p1654	689.5	4.11757	C37H72NO8P	PE(32:1)	8	Lipids: Glycerophospholipids	Glycerophosphoethanolamines	18675247	0.927263	1	1.00169	0.57166	1.77568	1.45662	0.662028	1.16799	1.38131	1.12499	2.11623	2.11901	1.32787	1.06211	6.8175e+06	7.7929e+06	5.56418e+06	6.82793e+06	7.93211e+06	7.67908e+06	8.60244e+06	7.21358e+06	6.98604e+06	7.19383e+06	7.6002e+06	7.92742e+06	5.99513e+06	7.74462e+06	8.47122e+06	4.22388e+06	3.67558e+06	4.6115e+06	4.33653e+06	4.6898e+06	1.47491e+07	1.07084e+07	1.26415e+07	1.56302e+07	1.31693e+07	1.16272e+07	9.46414e+06
p1933	451.27	4.95552	C21H42NO7P	LysoPE(16:1)	8	Lipids: Glycerophospholipids	Glycerophosphoethanolamines	12699014	1.18048	1	0.429018	0.234774	1.14247	0.534027	0.230928	1.48118	0.57945	0.488119	1.51625	0.675151	0.499239	0.45746	5.64362e+06	7.22607e+06	9.62165e+06	8.1778e+06	6.87447e+06	4.68407e+06	6.9347e+06	6.5136e+06	6.03637e+06	7.635e+06	2.7339e+06	2.69291e+06	2.67237e+06	2.53453e+06	3.01065e+06	999125	1.29534e+06	1.43738e+06	1.51029e+06	2.22454e+06	7.59218e+06	4.96554e+06	7.43259e+06	7.89519e+06	8.44921e+06	4.15714e+06	3.18428e+06
p3475	425.254	5.08737	C19H40NO7P	LysoPE(0:0/14:0)	8	Lipids: Glycerophospholipids	Glycerophosphoethanolamines	418642	0.950665	1	0.542342	0.583967	0.789912	0.542389	0.621308	1.43246	0.819512	0.266459	1.34765	0.899012	0.425327	0.322013	200350	215232	242567	215242	192216	123528	242046	237479	182531	335323	173569	133695	162680	45843.6	92127.5	108018	370007	96143.2	34460.2	45943.7	150639	162252	190896	185913	195717	187539	129810
p422	477.286	4.85056	C23H44NO7P	LysoPE(18:2)	6	Lipids: Glycerophospholipids	Glycerophosphoethanolamines	2574258	0.919997	1	0.660035	0.984621	0.982939	0.727582	1.07594	1.32585	0.954663	0.921718	1.17364	1.0679	0.956458	0.729441	653039	617084	1.21533e+06	937449	792190	634801	1.02183e+06	955925	846431	1.12264e+06	751037	613086	835797	379119	445003	477883	2.54536e+06	674462	353190	460274	640010	636003	980937	1.122e+06	1.12452e+06	922190	693338
p423	509.349	4.84559	C25H52NO7P	LysoPE(20:0)	6	Lipids: Glycerophospholipids	Glycerophosphoethanolamines	1220322	0.877614	1	0.76119	0.963921	0.780683	0.805195	1.01163	1.11854	1.01038	0.829831	0.982697	1.12797	0.850457	0.745108	482140	345220	485486	327939	315640	323221	560106	388577	420045	537307	372959	384332	451323	218362	269911	240043	1.22032e+06	304138	201739	182584	210348	297302	447116	372254	413323	503063	315206
p477	813.66	3.81412	C47H92NO7P	PE(P-42:1)	6	Lipids: Glycerophospholipids	Glycerophosphoethanolamines	68134276	0.683622	1	1.49895	1.87393	1.16202	1.55627	2.20821	1.43554	2.92424	6.13858	1.48377	3.41232	4.24561	1.60929	3.50414e+06	6.03995e+06	0	6.28068e+06	6.81884e+06	7.40697e+06	6.14354e+06	7.02632e+06	5.86106e+06	6.68511e+06	8.91962e+06	1.07734e+07	8.98003e+06	1.0054e+07	1.09227e+07	1.49948e+07	1.17362e+07	1.18743e+07	1.1303e+07	1.21618e+07	8.34143e+06	5.08608e+06	7.12304e+06	9.92968e+06	8.00945e+06	1.08151e+07	9.19702e+06
p739	717.53	4.07867	C39H76NO8P	PE(34:1)	8	Lipids: Glycerophospholipids	Glycerophosphoethanolamines	83996384	1.07885	1	0.816411	0.461229	0.964749	0.865501	0.491308	1.32326	1.16675	0.910204	1.18099	1.36959	1.01694	0.690741	5.94915e+07	6.02302e+07	4.05171e+07	5.35551e+07	5.84931e+07	5.35273e+07	5.43263e+07	4.91634e+07	4.16746e+07	5.36941e+07	4.28587e+07	4.62273e+07	3.69286e+07	3.93711e+07	4.06647e+07	2.3694e+07	2.45485e+07	2.30836e+07	2.09198e+07	2.41616e+07	5.31812e+07	3.42814e+07	5.01816e+07	5.30522e+07	5.27922e+07	4.53908e+07	3.96969e+07
p88	495.333	7.55881	C24H50NO7P	PE(19:0)	6	Lipids: Glycerophospholipids	Glycerophosphoethanolamines	11487028	0.895205	1	1.07917	1.30969	0.895993	1.06148	1.49979	1.35136	1.34022	0.970898	1.24769	1.59642	0.91676	1.29269	2.5096e+06	3.16524e+06	3.59434e+06	1.7564e+06	1.63323e+06	2.31591e+06	3.72612e+06	2.28161e+06	2.43875e+06	3.37829e+06	4.19522e+06	3.6418e+06	3.93983e+06	1.8835e+06	1.5998e+06	1.75967e+06	1.11827e+07	2.72592e+06	1.45515e+06	1.39644e+06	1.67643e+06	2.21522e+06	2.69036e+06	2.99808e+06	3.08987e+06	3.73528e+06	3.0127e+06
n1100	734.51	3.70032	C39H75O10P	PG(33:1)	8	Lipids: Glycerophospholipids	Glycerophosphoglycerols	12275187	0.722264	1	3.27155	7.45842	1.20078	3.17643	8.3507	1.38853	4.56577	8.29996	1.47732	5.07881	13.5456	5.02718	465974	360337	302439	356649	483818	561902	588367	514508	581864	479807	1.86858e+06	1.84598e+06	1.77204e+06	1.63908e+06	1.79404e+06	3.58482e+06	4.95803e+06	4.26045e+06	3.99914e+06	3.53254e+06	601757	423356	567080	962692	718975	2.06948e+06	1.73259e+06
n1101	762.542	3.68616	C41H79O10P	PG(35:1)	6	Lipids: Glycerophospholipids	Glycerophosphoglycerols	9599472	0.924627	1	2.91092	7.68879	1.19009	2.75532	8.53384	1.63833	4.6294	7.91102	1.33843	5.74539	17.2641	5.18187	346211	388760	240400	429542	510732	445200	495201	392268	335875	403261	1.36626e+06	1.31874e+06	1.09649e+06	1.09214e+06	1.15721e+06	2.99424e+06	3.50345e+06	3.23808e+06	3.30259e+06	2.89131e+06	544143	299554	315579	682452	623909	1.49857e+06	1.16818e+06
n1103	760.527	3.6894	C41H77O10P	PG(35:2)	6	Lipids: Glycerophospholipids	Glycerophosphoglycerols	5743989	0.622224	1	1.67645	3.38576	0.868815	1.71007	4.07208	1.20004	2.26318	6.82564	1.18099	2.59977	8.87918	2.8679	255243	259323	238886	239674	308251	396895	503397	314591	457061	419548	784659	811437	699600	539751	670831	1.59705e+06	1.49332e+06	1.33001e+06	1.49547e+06	1.16545e+06	350135	285692	318985	454414	407894	819010	671754
n1109	732.495	3.70639	C39H73O10P	PG(33:2)	6	Lipids: Glycerophospholipids	Glycerophosphoglycerols	2610720	0.190144	1	2.47582	4.11083	1.53543	2.74847	4.56117	0.778684	2.73676	9.31998	1.56102	3.85616	10.3722	3.55989	0	0	128625	0	0	144081	180248	0	227871	124265	296811	395677	383320	344167	254831	550176	648557	603650	548343	430102	229258	201849	117118	281423	209016	340266	427533
n1112	706.48	3.72045	C37H71O10P	PG(31:1)	6	Lipids: Glycerophospholipids	Glycerophosphoglycerols	1357583	0	0	57.4194	507.207	0	148.268	542.539	0	97.3543	236.452	0	89.7561	411.662	285.956	0	0	0	0	0	0	0	0	0	0	81273.4	0	0	110431	95392.8	490093	606971	542124	517418	379430	0	0	0	0	0	78623.5	174812
n1880	510.295	3.966	C24H47O9P	[PG (18:1)] 1-(9E-octadecenoyl)-sn-glycero-3-phospho-(1'-sn-glycerol)	8	Lipids: Glycerophospholipids	Glycerophosphoglycerols	5240251	0.888487	1	0.407296	0.118618	0.916393	0.378243	0.114976	1.17121	0.441742	0.354253	1.12133	0.475752	0.282238	0.489245	2.44638e+06	2.83968e+06	4.15048e+06	2.81289e+06	2.96261e+06	1.9804e+06	4.11073e+06	3.01262e+06	3.75614e+06	4.26141e+06	1.13439e+06	1.30338e+06	1.87661e+06	1.2474e+06	1.41167e+06	283401	605107	380724	388407	373250	3.00675e+06	2.54789e+06	3.27196e+06	3.4388e+06	3.42443e+06	1.3332e+06	1.38711e+06
n2035	772.526	3.68052	C42H77O10P	PG(36:3)	6	Lipids: Glycerophospholipids	Glycerophosphoglycerols	1042860	0.8981	1	0.572423	0.287192	0.75676	0.510211	0.30379	1.00894	0.540083	0.106697	0.79842	0.554639	0.410895	0.464189	762742	764776	519022	618282	650300	581968	1.04286e+06	646590	758453	661389	438762	495576	452460	399926	326237	151442	371006	176731	185471	175450	577549	464490	523018	717180	511162	327288	272776
n2314	484.28	4.01378	C22H45O9P	[PG (16:0)] 1-hexadecanoyl-sn-glycero-3-phospho-(1'-sn-glycerol)	8	Lipids: Glycerophospholipids	Glycerophosphoglycerols	1890775	0.994192	1	0.451454	0.478612	1.9402	0.59354	0.597646	1.50007	0.48862	1.2064	2.81983	1.16472	0.970789	1.04606	544753	433315	839631	393987	373560	380818	525373	317418	331986	1.04475e+06	298263	150027	166919	262733	295996	176314	659543	203912	86159.6	118629	951699	857802	1.31866e+06	928342	988680	409021	351339
n33	748.525	3.68899	C40H77O10P	PG(34:1)	8	Lipids: Glycerophospholipids	Glycerophosphoglycerols	167721366	0.941268	1	1.10149	0.262417	0.871599	1.06967	0.286025	1.30605	1.47402	0.544311	1.05768	1.59378	0.748857	0.78371	8.65928e+07	9.11392e+07	6.2486e+07	7.76747e+07	8.82777e+07	8.9875e+07	1.10358e+08	6.69924e+07	7.19687e+07	9.232e+07	9.88269e+07	9.63426e+07	9.66201e+07	8.7978e+07	9.55414e+07	2.02404e+07	2.78945e+07	2.14614e+07	2.38029e+07	1.98373e+07	8.28536e+07	5.82429e+07	6.16109e+07	9.45592e+07	7.88404e+07	1.10548e+08	8.79014e+07
n35	720.494	3.70346	C38H73O10P	PG(32:1)	6	Lipids: Glycerophospholipids	Glycerophosphoglycerols	29141991	0.814384	1	1.56084	0.434559	1.79059	1.93042	0.499665	1.25229	1.88692	0.843418	2.01237	2.50179	1.12704	1.19582	7.79995e+06	8.55601e+06	6.89025e+06	7.49591e+06	8.98525e+06	1.0291e+07	1.15539e+07	8.07984e+06	8.99633e+06	9.861e+06	1.55923e+07	1.45856e+07	1.6496e+07	1.49044e+07	1.45626e+07	3.59219e+06	5.67563e+06	4.19273e+06	3.90287e+06	3.83526e+06	1.83306e+07	1.40545e+07	1.47871e+07	2.27005e+07	1.7476e+07	2.00279e+07	1.8427e+07
n607	746.51	3.6931	C40H75O10P	PG(34:2)	8	Lipids: Glycerophospholipids	Glycerophosphoglycerols	35756399	0.734766	1	0.697814	0.225064	0.954455	0.697626	0.247642	1.08103	0.762464	0.504863	1.00419	0.841931	0.586017	0.579659	1.92199e+07	2.10605e+07	1.46613e+07	1.81586e+07	1.85271e+07	2.36537e+07	3.57564e+07	1.94918e+07	2.40174e+07	2.17834e+07	1.86531e+07	1.69248e+07	1.83098e+07	1.59306e+07	1.7201e+07	5.38693e+06	7.46507e+06	4.9746e+06	5.7519e+06	4.48764e+06	2.27847e+07	2.14465e+07	2.05116e+07	3.04099e+07	2.38703e+07	1.78471e+07	1.65647e+07
n608	774.542	3.68119	C42H79O10P	PG(36:2)	6	Lipids: Glycerophospholipids	Glycerophosphoglycerols	32447740	0.937739	1	0.603613	0.153639	0.670362	0.538476	0.15828	1.25026	0.783673	0.466018	0.774697	0.803864	0.472537	0.511979	1.81594e+07	1.89305e+07	1.28388e+07	1.8095e+07	1.82112e+07	1.82588e+07	2.63435e+07	1.45381e+07	1.54536e+07	1.73664e+07	1.19736e+07	1.12014e+07	1.11798e+07	1.02904e+07	1.08634e+07	2.97545e+06	3.43088e+06	2.28382e+06	3.19742e+06	2.24116e+06	1.29437e+07	1.07905e+07	1.0414e+07	1.46333e+07	1.28653e+07	1.14448e+07	9.4083e+06
p1652	723.506	3.70402	C37H74NO10P	PG (31:0)	6	Lipids: Glycerophospholipids	Glycerophosphoglycerols	1240135	0	0	139.984	632.02	96.7784	238.409	784.956	43.5447	228.957	232.54	91.5485	373.091	413.077	362.595	0	0	0	0	0	0	0	0	0	0	356830	0	131360	0	211728	584338	675834	717195	565254	617480	0	0	0	164276	319616	283253	185927
n1041	572.296	4.51857	C25H49O12P	[PI(16:0)] 1-hexadecanoyl-sn-glycero-3-phospho-(1'-myo-inositol)	6	Lipids: Glycerophospholipids	Glycerophosphoinositols	4306623	0.999446	1	0.960027	1.29183	0.823144	0.987957	1.35468	1.25754	1.40837	0.98323	1.01198	1.40963	0.847246	1.2714	1.6789e+06	1.30732e+06	2.13966e+06	602441	745584	875382	1.68101e+06	1.09122e+06	1.2337e+06	1.59619e+06	1.28748e+06	1.56636e+06	1.4229e+06	957485	984352	906574	4.30662e+06	1.45197e+06	916011	786686	832813	851968	1.16608e+06	1.15103e+06	1.33003e+06	1.76303e+06	1.26852e+06
n1738	598.311	4.4104	C27H51O12P	[PI(18:1)] 1-(9Z-octadecenoyl)-sn-glycero-3-phospho-(1'-myo-inositol)	6	Lipids: Glycerophospholipids	Glycerophosphoinositols	1589536	1.12554	1	0.892366	1.21788	0.820438	0.994812	1.30228	1.30984	1.26792	1.10185	0.98878	1.3928	0.785169	1.12335	721450	605969	803456	307687	455009	335817	636508	474441	481271	642784	457151	553566	556992	346543	379861	367623	1.4851e+06	470555	412770	394912	294877	387188	425244	444937	556953	554173	569491
n1739	600.327	4.38155	C27H53O12P	[PI(18:0)] 1-octadecanoyl-sn-glycero-3-phospho-(1'-myo-inositol)	6	Lipids: Glycerophospholipids	Glycerophosphoinositols	1583035	1.56878	1	0.739538	0.837751	0.827189	0.786674	0.830259	1.26827	1.07085	0.986784	0.917049	1.05158	0.707488	0.855284	1.22062e+06	1.34288e+06	1.58303e+06	742473	865684	596619	774499	700670	736990	859485	510254	686156	607819	431899	476693	451215	1.05789e+06	554054	500999	508931	508667	422911	631530	690383	780858	537297	620533
n2069	572.296	7.56485	C25H49O12P	[PI(16:0)] 1-hexadecanoyl-sn-glycero-3-phospho-(1'-myo-inositol)	8	Lipids: Glycerophospholipids	Glycerophosphoinositols	2249159	0.838215	1	1.07399	0.885651	0.91047	1.17354	0.998177	1.21921	1.30396	0.572256	1.04002	1.46532	0.561822	1.24241	1.07021e+06	994659	669809	386193	412406	575731	1.22529e+06	736346	733055	944821	1.09667e+06	1.22594e+06	1.0142e+06	633445	556884	516441	1.81828e+06	589248	429639	379626	542058	837288	775488	911442	771576	1.30257e+06	1.03101e+06
n2421	525.306	4.32853	C24H48NO9P	PS(18:0)	8	Lipids: Glycerophospholipids	Glycerophosphoserines	1310002	1.47281	1	0.72764	0.699724	0.711366	0.70454	0.753289	1.16842	0.85626	0.798092	0.908392	0.928264	0.673636	0.785628	845001	914312	1.31e+06	630107	682885	430144	602913	665164	577208	700046	351773	578750	466638	391937	375979	336288	733326	301964	379821	330612	419176	331927	379754	451283	534514	404508	434015
n2422	523.291	4.34121	C24H46NO9P	[PS(18:1)] 1-(9Z-octadecenoyl)-sn-glycero-3-phosphoserine	6	Lipids: Glycerophospholipids	Glycerophosphoserines	723403	1.15194	1	0.85962	1.06284	0.853355	0.849599	0.976931	1.39184	1.23187	1.01807	0.888798	1.29362	0.859992	1.00475	415946	415447	502643	242679	246831	223248	389055	258864	307404	404456	285633	330676	284488	227095	232910	181359	723403	295389	241880	240472	189177	232837	273972	296604	358294	269171	306116
p1358	763.536	3.68604	C40H78NO10P	PS(34:0)	8	Lipids: Glycerophospholipids	Glycerophosphoserines	39107978	0.89199	1	0.659465	0.335256	0.946417	0.698414	0.3383	1.19386	0.79929	0.532829	1.08493	0.84374	0.591019	0.656019	2.348e+07	2.3622e+07	2.61955e+07	2.30238e+07	2.53181e+07	2.6476e+07	3.12046e+07	2.51352e+07	2.93946e+07	2.41581e+07	1.88307e+07	1.72555e+07	1.68561e+07	1.99137e+07	1.70744e+07	8.8678e+06	1.08838e+07	8.33174e+06	9.14261e+06	8.49238e+06	2.65232e+07	1.97573e+07	2.55685e+07	2.91904e+07	2.80222e+07	1.82855e+07	1.67402e+07
p1508	791.568	3.67438	C42H82NO10P	PS(36:0)	8	Lipids: Glycerophospholipids	Glycerophosphoserines	33656978	1.16779	1	0.574581	0.260037	0.666113	0.526681	0.279818	1.33302	0.819515	0.475012	0.80983	0.836121	0.45593	0.560044	2.38443e+07	2.40507e+07	2.48892e+07	2.33866e+07	2.59575e+07	2.04757e+07	2.35119e+07	2.14687e+07	1.8903e+07	2.02216e+07	1.29934e+07	1.15851e+07	1.17298e+07	1.23114e+07	1.14705e+07	5.01015e+06	8.44044e+06	4.25157e+06	4.93374e+06	4.55898e+06	1.51498e+07	1.03855e+07	1.4788e+07	1.40396e+07	1.52999e+07	1.10965e+07	1.04212e+07
p1640	777.553	3.77993	C41H80NO10P	PS(35:0)	6	Lipids: Glycerophospholipids	Glycerophosphoserines	8760030	0.943263	1	0.843466	1.69284	0.861217	0.883755	1.97284	1.37146	1.0419	1.92036	1.12421	1.22539	2.45884	1.02353	1.73528e+06	2.40209e+06	653904	1.32907e+06	2.06769e+06	1.47803e+06	2.38014e+06	1.62822e+06	1.46393e+06	1.73021e+06	1.6238e+06	2.03347e+06	1.43332e+06	988418	1.24274e+06	2.6739e+06	4.87478e+06	2.282e+06	2.47478e+06	2.38928e+06	1.26211e+06	1.37613e+06	1.41278e+06	1.66747e+06	1.75733e+06	1.9e+06	1.57377e+06
p1749	747.542	3.84941	C40H78NO9P	PS(O-34:1)	6	Lipids: Glycerophospholipids	Glycerophosphoserines	8278467	0.783101	1	0.692345	0.831271	0.848349	0.741176	0.997645	1.20676	0.804537	0.427229	1.01737	0.814775	0.366661	0.607426	3.78017e+06	4.71831e+06	0	2.96856e+06	3.39985e+06	3.93637e+06	5.536e+06	3.04553e+06	2.57432e+06	3.89241e+06	2.69176e+06	3.60495e+06	3.25609e+06	1.8393e+06	1.75182e+06	2.37887e+06	7.59342e+06	2.66853e+06	1.59509e+06	1.54546e+06	2.75995e+06	2.84561e+06	3.52468e+06	3.58142e+06	3.39394e+06	3.26107e+06	2.55704e+06
p1972	1027.78	3.5673	C58H110NO11P	PS(52:0)	6	Lipids: Glycerophospholipids	Glycerophosphoserines	5014889	1.19527	1	0.26329	0.109696	1.18002	0.310185	0.132201	1.33471	0.36188	1.3318	1.42467	0.491407	1.02481	0.490151	2.78017e+06	3.33616e+06	397346	3.84704e+06	3.95307e+06	2.36564e+06	2.90081e+06	2.42507e+06	1.90619e+06	2.37768e+06	513138	673779	728792	563803	673487	280940	245622	215781	290369	280939	2.65696e+06	2.77843e+06	3.01708e+06	3.06657e+06	2.6121e+06	639424	800582
p2269	735.505	3.70445	C38H74NO10P	PS(32:0)	8	Lipids: Glycerophospholipids	Glycerophosphoserines	6103187	0.745031	1	0.909238	0.468487	1.68686	1.1663	0.538717	1.0493	0.924937	0.729482	1.77659	1.28576	0.855286	0.939681	1.94627e+06	1.99447e+06	2.73646e+06	2.10461e+06	2.131e+06	2.66131e+06	3.2211e+06	2.65304e+06	3.33755e+06	2.77446e+06	2.75658e+06	2.74921e+06	2.38949e+06	2.74944e+06	2.67329e+06	1.19573e+06	1.84874e+06	1.37512e+06	1.31111e+06	1.13144e+06	5.27954e+06	4.12707e+06	4.6206e+06	5.48378e+06	5.19719e+06	2.86653e+06	3.19051e+06
n1170	701.495	3.58005	C77H144O17P2	CL(16:1(9Z)/16:0/18:1(9Z)/18:1(9Z))	8	Lipids: Glycerophospholipids	Undefined	17770189	0.87795	1	0.553892	0.580731	0.549868	0.384942	0.558535	1.25755	0.681921	0.974263	0.729262	0.565485	0.924002	0.470516	9.70537e+06	1.10808e+07	755068	1.14412e+07	1.08818e+07	1.0578e+07	1.05951e+07	9.98882e+06	8.05976e+06	1.07404e+07	6.47973e+06	6.24896e+06	4.89843e+06	5.1068e+06	4.93968e+06	6.67024e+06	5.1779e+06	5.50048e+06	6.27547e+06	5.39044e+06	6.64146e+06	4.23562e+06	6.19687e+06	4.89712e+06	5.50145e+06	4.71192e+06	3.47988e+06
n2312	675.478	3.5885	C73H140O17P2	CL(16:0/16:0/16:1(9Z)/16:0)	8	Lipids: Glycerophospholipids	Undefined	1577420	0.761041	1	1.29418	1.70011	1.56477	1.85838	1.98186	1.29912	1.76103	1.82696	1.92957	2.63739	2.22398	1.30325	375024	453709	0	358987	564458	473619	458596	471561	380778	517789	492119	742904	576447	584871	583308	718614	758708	890174	701075	845658	924753	508960	832579	719238	617108	1.00751e+06	685623
n2833	413.238	7.56127	C40H76O13P2	PGP(34:2)	8	Lipids: Glycerophospholipids	Undefined	326864	0.432023	1	2.52315	1.11072	0.539887	2.20293	1.33281	0.585623	1.23984	0	0.180113	0.790019	0.743845	1.49534	87539.4	59026.2	28144.3	38107.1	0	109572	120871	40514.6	119212	102436	300490	292166	191795	258187	200279	118745	105442	115915	126297	80750.4	53640.8	30512.5	64097.2	56878.3	60822.7	182790	198374
n431	688.486	3.58503	C75H142O17P2	CL(16:1(9Z)/16:0/18:1(9Z)/16:0)	6	Lipids: Glycerophospholipids	Undefined	14550297	0.751016	1	1.00632	1.28877	1.09182	1.19397	1.59456	1.20686	1.42475	2.05439	1.39573	2.0328	1.95215	0.944833	3.20637e+06	3.42784e+06	431349	3.66593e+06	3.72987e+06	4.35865e+06	3.75427e+06	4.12813e+06	2.94404e+06	4.07062e+06	4.35658e+06	3.98393e+06	3.61522e+06	4.0892e+06	3.33249e+06	5.28458e+06	4.80756e+06	4.82638e+06	5.07783e+06	4.81984e+06	5.17764e+06	3.14621e+06	4.73015e+06	3.85691e+06	4.11289e+06	5.08605e+06	4.00153e+06
p1535	386.116	11.0306	C24H18O5	[Fv hydrox] 8-Cinnamoyl-3,4-dihydro-5,7-dihydroxy-4-phenylcoumarin	6	Lipids: Polyketides	Flavonoids	448596	0.213366	1	2.3469	1.87615	0.653621	2.16175	1.71107	0	0.866287	0	0.156995	0.16947	0.634586	0.961345	0	0	0	74269.7	37349.9	79320.1	67936	81314.9	209714	84850.9	232054	212593	239785	293489	249828	209452	448596	103299	117081	103052	51379.8	0	31802.8	113559	145191	215439	181517
n181	582.116	10.1178	C32H22O11	5'-Methoxybilobetin	6	Lipids: Polyketides	Undefined	220852	1.64669	1	2.72451	2.95171	1.97409	2.76124	2.8914	1.13276	2.67815	2.926	1.80677	2.29087	2.00128	2.40076	57005.8	52610.6	129246	51119.1	67335.9	31008.8	40429.7	42034.3	51498.4	52020.4	40589.8	128827	109961	138531	173286	148280	73716.1	134966	130943	152592	32491.1	220852	42004.7	56279.8	76734.7	85379.7	128265
p2285	152.12	4.27895	C10H16O	(1R,4S)-fenchan-2-one	6	Lipids: Prenols	C10 isoprenoids (monoterpenes) [PR0102]	2765546	1.25226	1	0.736399	0.696524	0.932752	0.784024	0.69796	1.41521	1.17715	1.48788	1.10728	1.20403	1.31917	0.713946	976288	1.22839e+06	2.76555e+06	1.47275e+06	1.37236e+06	1.15105e+06	914814	1.7929e+06	1.11953e+06	1.26267e+06	695317	1.02647e+06	844403	1.15684e+06	872808	949053	734204	684251	1.0391e+06	940372	1.22504e+06	669136	1.40208e+06	1.30524e+06	1.21977e+06	920546	987907
p1130	616.412	3.97948	C40H56O5	[PR] Fucoxanthinol	6	Lipids: Prenols	Isoprenoids	12673753	0.652907	1	0.99589	2.09146	0.990328	1.19032	2.05005	1.16125	1.44728	0.478717	1.14574	1.78652	0.336179	1.17192	1.46001e+06	2.04398e+06	0	1.1941e+06	1.30196e+06	1.35764e+06	2.51436e+06	1.50085e+06	1.66457e+06	2.15232e+06	2.31019e+06	2.53946e+06	2.36588e+06	1.3132e+06	623235	1.9265e+06	1.26738e+07	2.43044e+06	1.16444e+06	1.02479e+06	1.14217e+06	1.41563e+06	2.3131e+06	2.06778e+06	2.16218e+06	3.25871e+06	2.05528e+06
n2832	150.104	4.59586	C10H14O	[PR] (-)-Carvone	8	Lipids: Prenols	Monoterpenoid biosynthesis__Limonene and pinene degradation	518876	1.35422	1	0.274203	0.34031	0.540879	0.281638	0.387761	0.91261	0.208494	0.788625	0.491752	0.330542	0.526622	0.36653	518876	175106	345778	223459	187150	285505	356733	99311.1	178973	150482	79011	79781.4	29493.5	53864.2	51522	53096.7	72475.8	83039.1	116851	39010.6	104159	151291	72976.2	124509	126347	62017.4	85054.1
n1019	453.288	7.56654	C28H39NO4	Sambutoxin	6	Lipids: Prenols	Undefined	5216532	1.28689	1	0.562754	0.277535	0.995174	0.515194	0.28491	1.29875	0.909952	0.294959	1.46108	1.39398	0.27567	0.740319	4.15521e+06	4.29252e+06	3.74356e+06	2.81623e+06	3.42643e+06	2.77018e+06	3.74862e+06	2.75275e+06	2.16341e+06	2.88941e+06	1.8036e+06	1.7959e+06	1.80634e+06	1.3652e+06	1.29005e+06	468576	1.77466e+06	720133	482902	529245	3.5476e+06	2.59272e+06	2.80374e+06	2.82316e+06	2.48802e+06	1.7308e+06	1.51257e+06
n1980	675.487	4.1716	C43H65NO5	Acidissiminin epoxide	6	Lipids: Prenols	Undefined	613516	0.382343	1	0	9.61063	3.46735	2.82273	13.2297	0.583693	1.70678	8.66844	2.71418	4.27302	5.69195	8.35268	0	63830.7	0	0	0	0	166946	0	0	0	0	0	0	0	0	287299	275912	348913	357573	334757	103367	35664.3	149063	137390	153376	0	88967.9
p3804	328.167	12.4885	C20H24O4	(all-E)-Crocetin	6	Lipids: Prenols	Undefined	143940	0.538806	1	0.946371	0.840101	0.965127	0.994881	0.835778	0.806553	0.865916	0.584555	0.772307	0.660264	0.69148	0.643816	36061.4	91339.3	50685.7	73689.3	70628.4	140200	116724	143940	111585	85918.6	129487	114306	96049.6	115114	111320	100471	108493	84429.1	96819.3	112476	121881	105661	142354	112541	95062.4	132253	121994
p1111	553.543	3.96902	C35H71NO3	Cer(d35:0)	6	Lipids: Sphingolipids	Ceramides	13632439	1.18106	1	0.8834	0	0	0	0	0	0	0	0	0.743891	0.760201	0.3451	1.31752e+07	0	0	0	0	0	0	1.11554e+07	0	0	0	0	9.85466e+06	0	0	0	0	0	0	0	0	0	0	0	0	0	0
p2735	783.649	3.82591	C46H90NO6P	[SP (26:0)] N-(17Z-hexacosenoyl)-sphing-4-enine-1-phosphate	6	Lipids: Sphingolipids	Ceramides	1922332	0	1	3.59914	0	1.58203	3.06418	0	2.65815	5.01338	1.34394	2.95719	3.54489	1.87836	1.56801	0	0	0	0	0	372343	0	320771	0	347404	632657	870070	654461	776185	811602	0	0	0	0	0	439719	193911	251547	475741	285212	597666	566206
n2204	570.968	7.57217	C78H140N2O38	GalNAcbeta1-3Galalpha1-3Galalpha1-3Galalpha1-3Galalpha1-4Galbeta1-4Glcbeta-Cer(d18:1/16:0)	8	Lipids: Sphingolipids	Neutral glycosphingolipids	2815181	1.17076	1	0.464203	0.0914605	0.817043	0.418267	0.108836	1.39591	0.625083	0.521358	0.902687	0.63903	0.512285	0.420397	1.41797e+06	1.96208e+06	1.55107e+06	1.75933e+06	1.94892e+06	1.88993e+06	1.80276e+06	1.15764e+06	1.35796e+06	1.17099e+06	779329	715959	650337	818391	461467	165476	189531	158204	89691.8	72010.5	1.40461e+06	966383	1.17535e+06	1.28096e+06	1.20189e+06	935186	586007
n744	856.454	4.77272	C78H140N2O38	GalNAcbeta1-3Galalpha1-3Galalpha1-3Galalpha1-3Galalpha1-4Galbeta1-4Glcbeta-Cer(d18:1/16:0)	6	Lipids: Sphingolipids	Neutral glycosphingolipids	716713	1.09024	1	0.445791	0.125919	0.80794	0.390047	0.145544	1.37738	0.522165	0.647642	1.08733	0.543327	0.606092	0.348933	211666	290668	492364	392732	405628	338563	429560	284931	305169	286427	155643	169322	136151	138071	133983	32874.7	52025.6	43720.1	40454	38018.3	292555	222056	252702	302218	259246	171128	124621
p2442	1181.76	3.52099	C60H111NO21	Fucalpha1-2Galalpha1-3Galbeta1-4Glcbeta-Cer(d36:1)	6	Lipids: Sphingolipids	Neutral glycosphingolipids	1706767	1.07647	1	0.510141	0.873692	0.811718	0.484111	0.836594	1.47531	0.684955	1.93139	1.15958	0.698624	1.94507	0.776499	791660	842989	455902	712045	701800	713129	782614	715192	569335	475182	296910	358392	396116	332672	276650	679342	503674	589872	567594	503781	604761	484080	585500	550396	417772	311857	307427
p1893	285.303	7.59796	C18H39NO	[SP] 1-deoxy-sphinganine	6	Lipids: Sphingolipids	Sphingoid bases	6167501	0.779101	1	0.35204	0.0442242	2.52598	0.642234	0.05484	0.9895	0.453331	0.850862	1.39094	0.525219	0.496475	0.60213	998674	674412	550677	871099	1.53795e+06	1.1837e+06	1.80873e+06	1.7218e+06	297542	934586	241888	623584	679015	375935	172932	18352.9	138400	64983.5	13651.9	27584.2	6.1675e+06	1.89198e+06	4.12097e+06	1.3898e+06	1.45014e+06	1.49453e+06	563573
p1953	285.303	4.61903	C18H39NO	[SP] 1-deoxy-sphinganine	6	Lipids: Sphingolipids	Sphingoid bases	4192803	1.0005	1	0.964526	1.13386	0.951753	1.06613	1.18845	1.83132	1.56906	1.81766	1.33454	1.69412	1.81509	1.04398	1.58983e+06	1.48464e+06	1.04624e+06	964357	1.42394e+06	1.24413e+06	1.6545e+06	1.65091e+06	754819	1.20141e+06	1.17543e+06	1.73441e+06	1.33113e+06	1.05511e+06	978902	1.59585e+06	1.52496e+06	1.37928e+06	1.5247e+06	1.35182e+06	1.18249e+06	1.00547e+06	1.57818e+06	1.04496e+06	1.38079e+06	1.4534e+06	1.53476e+06
p3006	301.298	5.00309	C18H39NO2	[SP amino(18:0/2:0)] 2S-aminooctadecane-1,3R-diol	6	Lipids: Sphingolipids	Sphingoid bases	476821	0.803396	1	1.3365	2.59457	1.48905	1.5696	2.9699	1.4001	2.07119	2.31689	2.33018	2.34691	3.30263	1.72128	143004	109001	113461	58131.5	58561.5	116309	155348	129763	93749.9	104981	209070	177422	218389	116582	80640.9	286359	476821	242132	279486	272337	154786	150522	190302	200201	197841	224272	238420
p427	329.329	4.87611	C20H43NO2	[SP dimethyl,amino(18:0/2:0)] 2S-dimethylaminooctadecane-1,3R-diol	6	Lipids: Sphingolipids	Sphingoid bases	750899	1.06187	1	0.764157	1.10973	1.08263	0.78274	1.2028	1.14149	0.998685	0.878941	1.40634	1.03405	1.00209	0.801287	225927	295482	320753	255890	352546	196366	363568	266048	240148	299946	260874	261997	232596	148543	139887	183213	750463	267859	146877	167561	214332	277383	348577	304900	333758	251475	215679
p1213	562.388	4.02733	C33H54O7	Cholesterolglucuronide	6	Lipids: Sterol lipids	Pentose and glucuronate interconversions__Starch and sucrose metabolism	5124269	0.90502	1	0.779201	1.09985	0.87	0.831167	1.14638	1.13511	1.06429	0.929583	1.10308	1.24522	0.794203	0.958995	2.09703e+06	2.54117e+06	0	1.67772e+06	2.38365e+06	1.40615e+06	2.68397e+06	1.58153e+06	1.84059e+06	2.10033e+06	1.56148e+06	1.65094e+06	2.26193e+06	999519	1.01625e+06	1.28908e+06	5.12427e+06	1.75233e+06	1.11485e+06	1.29184e+06	1.2709e+06	1.56188e+06	1.82293e+06	1.78728e+06	1.91994e+06	1.93642e+06	1.63109e+06
p1243	302.061	13.9462	C8H18N2O6S2	PIPES	6	Medium Component	Undefined	1809986	1.19104	1	0.7247	0.648923	0.987468	0.778147	0.630067	1.34998	1.24825	1.20518	1.19151	1.47139	0.773779	0.934282	1.09425e+06	1.16887e+06	1.42849e+06	1.0153e+06	955752	878255	810498	1.09855e+06	854664	1.11242e+06	661610	652236	698599	673400	759663	649036	686385	515303	588502	646006	1.1725e+06	601412	1.20817e+06	799708	913021	636260	770715
p1369	221.109	9.21498	C9H19NO3S	CAPS	8	Medium Component	Undefined	46296975	1.13869	1	0.737322	0.656229	0.916156	0.767687	0.66289	1.28232	1.01093	1.19935	1.10426	1.1539	1.02582	0.894184	3.12158e+07	3.13962e+07	3.33173e+07	2.58809e+07	3.0548e+07	3.03992e+07	2.43448e+07	2.66271e+07	2.25168e+07	2.99128e+07	2.1471e+07	2.05602e+07	1.86102e+07	1.82667e+07	1.97461e+07	1.69918e+07	1.94708e+07	1.61266e+07	1.6922e+07	1.82928e+07	2.83052e+07	1.72455e+07	2.77985e+07	2.53809e+07	2.38522e+07	1.92353e+07	2.44431e+07
p3158	195.056	12.5423	C6H13NO4S	MES	6	Medium Component	Undefined	199105	0.752324	1	1.46944	1.19135	1.04435	1.46862	1.20846	0.741257	1.35665	1.45987	0.898003	1.30609	1.3211	1.13283	89119.4	73667.3	98697.8	74556.5	81306.5	127859	88621.4	95556.6	124049	118658	169603	135154	178378	171233	160799	130904	115451	117034	151126	146379	90058.1	119037	133007	99004.2	138241	153494	144527
p3625	191.025	14.5783	C6H9NO4S	a Cysteine adduct	6	Medium Contaminant	Undefined	222967	0.655022	1	2.71432	3.745	0.931435	1.79264	3.62705	0.448975	1.37817	1.36596	1.07332	1.23747	2.70769	2.17348	0	48336.8	34477.5	0	36135.9	38804.2	36764.4	30815.5	35360.8	39852.3	68578.3	138487	102440	101634	81772.8	161464	222967	76866.1	108195	110590	34833.9	33948.2	28649.9	38245.3	33468.8	49882.3	79166
p2176	246.103	8.69234	C10H18N2O3S	9-mercaptodethiobiotin	8	Metabolism of Cofactors and Vitamins	biotin biosynthesis II	4951863	1.45747	1	0.990212	1.27256	1.64111	1.04367	1.27142	1.04683	0.910273	1.88129	1.09546	0.946806	1.55137	1.11148	1.37579e+06	1.23743e+06	3.28066e+06	1.30839e+06	1.34438e+06	978685	1.4406e+06	1.42673e+06	1.18388e+06	834131	1.15333e+06	1.12816e+06	1.19734e+06	1.2234e+06	1.1044e+06	1.50172e+06	884522	2.2414e+06	1.44938e+06	1.38533e+06	1.01826e+06	4.95186e+06	1.1203e+06	1.19772e+06	1.33536e+06	1.05645e+06	1.37107e+06
n694	187.121	7.57797	C9H17NO3	8-Amino-7-oxononanoate	6	Metabolism of Cofactors and Vitamins	Biotin metabolism	485036	1.26355	1	0.821992	0.700259	1.00526	0.767713	0.643122	1.19533	0.959292	0.9676	1.05644	1.29964	0.814064	1.2999	196643	305194	192609	244784	162941	176651	148092	223527	159394	164621	147761	149784	145503	147803	126160	128511	129821	122543	104036	125914	133910	171120	252584	152199	167058	107049	126809
p2858	188.153	21.4194	C9H20N2O2	7,8-Diaminononanoate	8	Metabolism of Cofactors and Vitamins	Biotin metabolism	1332481	0.772707	1	2.71438	16.9538	0.981129	2.2248	15.3003	0.599014	1.34403	0.929228	0.735084	0.902476	1.81317	3.18058	37889.2	39183.1	53988.4	53705.3	52779	51920.4	49123	71706.2	78958.6	55710.9	142319	159965	148013	210433	173722	1.17395e+06	985190	1.17699e+06	978118	897675	59254.5	56701.6	63632.2	54096.6	67932.9	130893	126639
p748	214.132	8.8614	C10H18N2O3	Dethiobiotin	8	Metabolism of Cofactors and Vitamins	Biotin metabolism	36995844	0.989965	1	0.970886	1.17599	1.38494	1.08556	1.22085	0.789502	0.785931	1.3991	0.89551	0.762317	0.841881	0.926065	1.21727e+07	1.4446e+07	2.31015e+07	1.42174e+07	1.38307e+07	1.51537e+07	1.65532e+07	1.57174e+07	1.8692e+07	1.24402e+07	1.21017e+07	1.71425e+07	1.50377e+07	1.57847e+07	1.6203e+07	2.15854e+07	1.14028e+07	1.51652e+07	2.10333e+07	2.31951e+07	1.72732e+07	3.69958e+07	1.62082e+07	2.12096e+07	1.71093e+07	1.84321e+07	1.722e+07
p2565	155.991	8.66997	C3H8O3S2	2-(Methylthio)ethanesulfonate	6	Metabolism of Cofactors and Vitamins	Folate biosynthesis	3671630	1.70956	1	0.680362	0.701387	0.943976	0.750649	0.728435	1.58301	1.1227	2.2748	1.63886	1.6071	1.45452	1.104	1.59474e+06	1.42275e+06	2.67978e+06	1.3208e+06	1.51537e+06	807109	978529	1.33742e+06	707009	1.16154e+06	672266	692285	709606	684105	637839	592547	700102	996115	569545	642739	989585	617473	1.18263e+06	905346	1.01692e+06	584543	865276
p304	239.102	10.232	C9H13N5O3	Dihydrobiopterin	6	Metabolism of Cofactors and Vitamins	Folate biosynthesis	473592	1.20898	1	0.842789	1.57872	0.768339	0.767198	1.41291	0.799968	0.614853	0.709289	0.842614	0.508486	0.64717	1.16101	279224	264265	314890	265061	218555	305508	262929	235281	163870	142432	90286.9	256854	202371	220179	165822	352794	473592	337875	274664	313492	197813	119644	245802	151108	138504	113487	213133
n687	180.054	7.57601	C8H8N2O3	Nicotinurate	6	Metabolism of Cofactors and Vitamins	Nicotinate and nicotinamide metabolism	545268	1.51304	1	1.23119	1.57447	2.29951	1.09852	1.1807	1.57667	1.4325	3.92642	2.24319	1.65626	2.33509	1.46758	145462	82951.5	232323	68641.3	170396	33543.1	138894	122398	80143.4	87516.8	115288	94850.1	106058	153445	99779	154576	81176.2	249694	100070	142667	104077	545268	144762	106973	162433	57214.1	95500
p1698	144.042	13.4766	C6H8O4	2,3-Dimethylmaleate	6	Metabolism of Cofactors and Vitamins	Nicotinate and nicotinamide metabolism	939676	0.881918	1	1.51626	1.35252	1.16706	1.44132	1.06945	0.626488	1.02346	1.0404	0.828703	0.783064	1.04504	1.05687	315695	286058	628432	420158	468746	313680	406485	446095	693186	543372	665431	783722	589205	871306	733644	678617	790480	480797	743171	556803	454816	743429	473083	535686	597225	548437	810331
p2150	122.048	7.61628	C6H6N2O	Nicotinamide	6	Metabolism of Cofactors and Vitamins	Nicotinate and nicotinamide metabolism	2597886	1.14248	1	1.54814	3.435	0.708113	1.2877	2.92652	0.629372	1.98051	1.13927	0.7564	1.61098	1.84758	1.3221	244182	442740	609972	1.04403e+06	628530	359577	406044	501395	590586	741515	977038	568403	663913	1.09104e+06	723413	1.47112e+06	1.47054e+06	1.6178e+06	1.77061e+06	2.59789e+06	262300	105823	291364	475595	705388	748452	543485
p3238	334.057	15.368	C11H15N2O8P	Nicotinamide D-ribonucleotide	10	Metabolism of Cofactors and Vitamins	Nicotinate and nicotinamide metabolism	584618	1.42503	1	1.25268	1.53439	0.652385	1.04939	1.48018	0.917911	0.656196	0.479345	0.730789	0.560863	0.645983	0.874409	243379	407257	295977	454612	452098	226116	290493	198180	315156	270604	159137	295449	337242	478244	359096	314032	444618	584618	290075	362204	187641	171136	186502	162451	140729	213261	310097
p2684	123.032	7.75757	C6H5NO2	Nicotinate	8	Metabolism of Cofactors and Vitamins	Nicotinate and nicotinamide metabolism__Alkaloid biosynthesis II	979295	1.87428	1	0.686025	1.88413	0.667189	0.672466	1.49742	2.48277	0.944685	2.34616	0.915816	1.11741	1.55259	1.12879	190737	471410	233404	482261	742222	211940	264816	215001	271771	167592	133703	176101	131090	177986	157096	482846	370412	650463	304017	323441	122246	293010	178431	112128	48854.7	131787	271828
n1674	299.077	14.8076	C9H18NO8P	D-4'-Phosphopantothenate	6	Metabolism of Cofactors and Vitamins	Pantothenate and CoA biosynthesis	475233	1.73148	1	2.08186	33.128	0.188005	1.93368	33.4287	0	0	0.197965	0	0	2.88066	7.2817	14330.1	7793.36	8479.13	17310.3	14216.6	8174.16	5192.74	0	17359.1	5156.43	14078.5	15108.5	7882.51	19921.6	17711	475233	177568	177028	241457	117426	0	0	0	0	6746.08	12281.6	17689.2
n3151	687.149	9.62923	C21H35N7O13P2S	Dephospho-CoA	8	Metabolism of Cofactors and Vitamins	Pantothenate and CoA biosynthesis	117934	1.38845	1	0.671746	1.50789	0.663354	0.625113	1.53102	0.352312	0.116942	0	0.346477	0	0.439342	0.923482	32459.9	37284.9	25354.6	39438.4	29157.5	26818.3	20904.1	20383.4	33202.7	16589.3	13906.1	13590.8	18534.1	18000.2	15166.1	45169.5	27597.1	38354.3	38937.7	27718.4	18949.1	12027	13630.6	17101.2	16500.1	16470	17807.5
p3222	358.096	10.0079	C11H23N2O7PS	Pantetheine 4'-phosphate	8	Metabolism of Cofactors and Vitamins	Pantothenate and CoA biosynthesis	634507	0	0	0	355.548	0	0	289.752	0	0	16.2518	0	0	64.5526	112.164	0	0	0	0	0	0	0	0	0	0	0	0	0	0	0	546018	194402	386115	392388	258816	0	0	0	0	0	0	0
p3876	205.132	11.0762	C9H19NO4	Pantothenol	8	Metabolism of Cofactors and Vitamins	Pantothenate and CoA biosynthesis	185312	1.56494	1	0.795566	0.997389	0.925852	0.759457	0.730049	1.6436	1.21829	1.31989	1.26779	1.46718	1.19037	1.01318	168916	93432.7	140640	88298	76886.7	67076.8	73655.8	82001.1	60181	80150.6	58390.7	103297	43552.1	39158.6	44444	89009.7	117287	51659.3	69635.9	34525.6	91911.6	48863.6	82887.8	53307	59174.8	66388.8	50116.5
p1340	785.157	11.3255	C27H33N9O15P2	FAD	6	Metabolism of Cofactors and Vitamins	Riboflavin metabolism	3503751	1.09142	1	0.916396	0.831325	0.883168	0.893612	0.899788	1.20979	1.13179	1.61959	1.1544	1.27658	1.2202	1.07848	1.61065e+06	1.64554e+06	1.56891e+06	1.58568e+06	1.59867e+06	1.62997e+06	1.25906e+06	1.30984e+06	1.46963e+06	1.67008e+06	1.37643e+06	1.1723e+06	1.16149e+06	1.57808e+06	1.43673e+06	1.1607e+06	1.31492e+06	1.10096e+06	1.18855e+06	1.33562e+06	1.58915e+06	928766	1.35291e+06	1.19292e+06	1.41745e+06	1.5018e+06	1.41582e+06
p1878	278.127	9.98242	C14H18N2O4	alpha-Ribazole	8	Metabolism of Cofactors and Vitamins	Riboflavin metabolism__Porphyrin and chlorophyll metabolism	7174168	1.51422	1	0.841732	1.18373	1.47963	0.840701	1.19673	1.16566	0.942185	1.62624	1.12023	1.00499	1.33485	1.02296	3.03857e+06	2.14547e+06	6.06972e+06	2.0955e+06	2.49716e+06	1.90676e+06	2.40607e+06	2.46393e+06	1.79946e+06	1.88884e+06	1.87191e+06	1.6905e+06	1.69765e+06	2.00812e+06	1.54059e+06	2.57649e+06	1.5345e+06	3.40636e+06	2.50907e+06	2.36142e+06	1.82156e+06	7.17417e+06	2.04423e+06	2.0241e+06	2.42031e+06	1.56499e+06	1.79834e+06
n1912	750.594	3.65685	C52H78O3	Nonaprenyl-4-hydroxybenzoate	6	Metabolism of Cofactors and Vitamins	ubiquinone-9 biosynthesis (prokaryotic) __ ubiquinone-9 biosynthesis (eukaryotic)	1437161	0.873794	1	0	0	0.888886	0	0	1.0341	0	0.469414	0.915432	0	0.218066	0.273965	1.04548e+06	893401	0	860902	948233	948574	1.37118e+06	661825	703367	604407	0	0	0	0	0	0	0	0	0	0	705018	796345	504432	918456	888498	0	0
n930	165.043	12.8516	C8H7NO3	4-Pyridoxolactone	6	Metabolism of Cofactors and Vitamins	Vitamin B6 metabolism	354514	1.18389	1	0.820669	0.728341	0.951006	0.857633	0.676263	1.16015	1.02129	1.17034	1.10951	0.917736	0.983186	0.757323	308388	301764	289957	323407	354514	305373	220734	291763	245762	269289	228489	198511	236367	208357	222163	184558	210580	179731	190898	205054	270934	179485	274785	269509	272902	224707	223373
p3468	165.043	5.37144	C8H7NO3	4-Pyridoxolactone	8	Metabolism of Cofactors and Vitamins	Vitamin B6 metabolism	694369	1.09624	1	0.76609	0.617319	0.876287	0.767801	0.636338	1.26427	1.00041	1.26191	1.18982	1.21113	0.933761	0.796154	470363	512179	529484	416395	476477	427875	526227	413889	340082	485702	382509	313471	324037	303007	357603	237713	292953	268982	267141	287470	418847	254766	402666	445356	400741	372478	322506
p3743	248.056	15.1719	C8H13N2O5P	Pyridoxamine phosphate	8	Metabolism of Cofactors and Vitamins	Vitamin B6 metabolism	206434	0.855393	1	0.936521	0.62577	0.848638	0.936902	0.616664	0.810673	0.882643	0.514402	0.95189	0.771225	0.557397	0.681024	178523	120644	163101	156334	142746	206434	184009	145685	191845	162083	147875	161180	165828	200268	158404	118481	111627	115179	116023	95660.9	201821	81544.7	128742	161664	181563	165983	171143
n1933	348.047	15.1781	C10H13N4O8P	IMP	8	Nucleotide Metabolism	Purine metabolism	832374	0.695471	1	2.4786	3.72763	1.06986	2.14572	3.24227	0.391176	0.909447	0.140132	0.656852	0.524296	0.839947	1.5376	71208.7	105993	92471.1	177309	135713	107384	132486	182852	252818	162302	222886	413677	355191	550423	534499	698070	555137	832374	570663	466918	128415	139213	200385	211021	217336	255925	374367
n975	168.028	12.4959	C5H4N4O3	Urate	8	Nucleotide Metabolism	Purine metabolism	25703398	0.603657	1	2.12686	2.05537	1.15858	2.1411	2.2028	0.972092	2.52511	3.56887	1.60714	2.607	2.86109	2.74864	2.23057e+06	1.44824e+06	2.62598e+06	2.3133e+06	2.15505e+06	3.68719e+06	4.00135e+06	3.29232e+06	3.88978e+06	2.97582e+06	6.82546e+06	8.73969e+06	7.47097e+06	8.16693e+06	6.7539e+06	6.93146e+06	7.97905e+06	8.57066e+06	6.99783e+06	6.20216e+06	4.12701e+06	4.4789e+06	3.2285e+06	5.17699e+06	3.6651e+06	8.08158e+06	8.08833e+06
p1377	267.097	9.19606	C10H13N5O4	Adenosine	8	Nucleotide Metabolism	Purine metabolism	2777019	1.89857	1	0.338087	0.335792	0.853091	0.392022	0.323396	1.00492	0.56644	3.08019	1.01684	0.536679	1.45988	0.732639	852116	967156	1.53861e+06	881443	962940	620913	507083	489703	481322	641069	200331	152827	194825	183724	194682	222885	156716	180590	183356	176552	507822	336150	577709	409560	506307	282993	210276
p2487	443.024	17.4496	C10H15N5O11P2	GDP	10	Nucleotide Metabolism	Purine metabolism	3044332	0.971524	1	1.02978	1.2941	0.856555	0.933844	1.31088	0.898765	0.832849	0.372752	0.95273	0.808055	0.51097	0.966293	1.6006e+06	1.46614e+06	1.90662e+06	1.46444e+06	1.33112e+06	1.67967e+06	1.49987e+06	1.47787e+06	1.71714e+06	1.62209e+06	1.38421e+06	1.71109e+06	1.4385e+06	1.93708e+06	1.76388e+06	1.96495e+06	3.04433e+06	1.88606e+06	1.82153e+06	1.63159e+06	1.69517e+06	1.0482e+06	1.31117e+06	1.38946e+06	1.40556e+06	1.3954e+06	1.48438e+06
p2649	252.086	9.63442	C10H12N4O4	Deoxyinosine	6	Nucleotide Metabolism	Purine metabolism	577471	0.548716	1	4.89469	8.11675	0.764685	3.739	8.0114	0.174939	0.741075	0.672548	0.219807	0.466371	2.53578	2.8685	25878.1	26033.3	28045.9	50893.6	17793.6	51924.8	57008.6	63816.2	69406.1	28739.5	344740	251929	193843	275622	259814	493946	434805	564002	326903	379134	28706.8	54326.8	28954.4	50109.6	45051.9	200933	235217
p2747	268.081	10.9078	C10H12N4O5	Inosine	10	Nucleotide Metabolism	Purine metabolism	1746040	0.417313	1	2.41546	1.92357	0.508079	1.56257	1.845	0.275619	0.290112	0.163014	0.233617	0.184526	0.729558	0.97847	202194	195655	137878	457728	236582	763927	492627	547274	748359	395328	1.27143e+06	1.31376e+06	1.3709e+06	1.74604e+06	1.41748e+06	1.26402e+06	1.43676e+06	1.0642e+06	995257	909530	339203	245232	300554	390605	221975	805313	965524
p2821	331.068	12.6829	C10H14N5O6P	dAMP	10	Nucleotide Metabolism	Purine metabolism	2137617	1.45823	1	0.934529	0.71326	0.931543	0.835537	0.668516	0.616629	0.588956	0.442394	0.854375	0.452745	0.65875	0.668932	1.91103e+06	2.07467e+06	1.452e+06	2.13762e+06	1.31962e+06	1.58717e+06	748126	1.09895e+06	1.3791e+06	1.28646e+06	1.30661e+06	894317	939678	1.30697e+06	1.25287e+06	945210	785644	1.24627e+06	714229	659399	1.66424e+06	482468	1.19334e+06	1.0916e+06	1.2506e+06	997793	902101
p289	136.039	10.21	C5H4N4O	Hypoxanthine	10	Nucleotide Metabolism	Purine metabolism	112316010	1.26322	1	1.61937	3.76029	0.943136	1.41336	3.3747	0.61689	0.705436	0.653783	0.740664	0.465422	0.619667	1.64132	2.93716e+07	2.80545e+07	3.73678e+07	3.0448e+07	2.37503e+07	2.7758e+07	2.9748e+07	2.71022e+07	1.93578e+07	1.39805e+07	1.67371e+07	4.12556e+07	3.69612e+07	5.85001e+07	3.7545e+07	9.03288e+07	1.05633e+08	1.03218e+08	7.10755e+07	7.32582e+07	1.97142e+07	2.98444e+07	2.84214e+07	1.81571e+07	1.51024e+07	2.58421e+07	3.93098e+07
p2895	283.092	12.5884	C10H13N5O5	Guanosine	10	Nucleotide Metabolism	Purine metabolism	1254107	0.356889	1	2.60874	2.22131	0.479705	1.85473	2.31488	0.26419	0.362352	0.20807	0.243824	0.223622	0.549345	1.10451	129317	165197	115439	185423	121964	492823	330201	424050	553589	209321	784800	1.05693e+06	1.25411e+06	1.18014e+06	967543	1.00794e+06	1.16536e+06	655709	895860	739928	219198	131433	221965	227888	163717	585117	803940
p3328	364.042	17.5337	C10H13N4O9P	Xanthosine 5'-phosphate	10	Nucleotide Metabolism	Purine metabolism	533970	1.51395	1	1.30975	0.814126	1.14669	1.07019	0.763621	0.513586	0.771931	0.14839	0.861658	0.543798	0.301727	0.781034	167347	260351	326658	528686	390441	172539	147326	207958	256092	321457	281881	191966	302373	260791	410753	223498	64696.3	338612	128187	144919	315109	144283	210493	251845	345786	304060	189840
p3840	411.035	14.0077	C10H15N5O9P2	dADP	10	Nucleotide Metabolism	Purine metabolism	150856	1.19002	1	0.939629	0.876556	0.902741	0.943282	0.913265	0.61412	1.00109	0.569829	0.914835	0.898691	0.77976	0.81365	122702	124828	133813	122723	107116	94079.7	73923.8	107292	87439.2	150856	97988.3	91957.8	74454.3	128389	89795.3	79295.9	87802.6	74911.4	109604	98577.2	121455	71121.7	91844.1	72662.7	106556	91439	76715
p979	347.063	13.5976	C10H14N5O7P	3'-AMP	8	Nucleotide Metabolism	Purine metabolism	35040758	0.928838	1	1.20248	1.32561	0.941877	1.03714	1.31539	0.559053	0.714779	0.265608	0.73802	0.504419	0.76398	0.854856	1.55438e+07	1.89388e+07	1.95669e+07	2.80709e+07	1.94821e+07	2.45445e+07	1.71373e+07	1.68495e+07	2.8025e+07	2.28303e+07	2.8969e+07	2.38722e+07	2.12096e+07	2.94491e+07	2.80351e+07	2.93838e+07	3.28639e+07	3.27848e+07	2.62404e+07	2.3731e+07	2.37847e+07	1.33202e+07	1.93861e+07	2.15859e+07	2.49516e+07	2.18752e+07	2.24293e+07
p3110	463.074	17.7989	C14H18N5O11P	N6-(1,2-Dicarboxyethyl)-AMP	8	Nucleotide Metabolism	Purine metabolism__Alanine and aspartate metabolism	826024	0.506841	1	2.14206	4.46362	1.25039	1.9119	3.79204	0.415927	0.700899	0.564838	0.419868	0.654554	2.90251	1.96344	54120.6	64948.2	91322	73745.9	66563.5	115093	116509	124081	206460	129790	136316	310592	213308	448009	373938	685780	534256	562196	730245	576049	156708	173271	156393	177788	201024	194792	214448
n957	152.033	11.2412	C5H4N4O2	Xanthine	10	Nucleotide Metabolism	Purine metabolism__Caffeine metabolism	15576781	0.733477	1	1.75696	2.06002	1.05424	1.67285	2.00872	0.574891	0.926583	0.447955	0.868504	0.650705	0.750502	1.23979	3.38374e+06	4.40542e+06	3.76802e+06	5.24334e+06	5.2744e+06	5.65649e+06	7.22291e+06	5.82183e+06	6.39587e+06	4.99913e+06	7.19951e+06	1.15452e+07	1.038e+07	1.3347e+07	1.04063e+07	1.22101e+07	1.55768e+07	1.34324e+07	1.07984e+07	9.98111e+06	5.68917e+06	6.77435e+06	6.53807e+06	6.34445e+06	6.38262e+06	8.90612e+06	1.14052e+07
p3553	284.076	12.0411	C10H12N4O6	Xanthosine	8	Nucleotide Metabolism	Purine metabolism__Caffeine metabolism	439080	2.05456	1	0.983439	0.120832	1.05758	0.807462	0.143138	0.43647	0.33986	0.166643	0.797015	0.1821	0.0538369	0.506406	224406	167288	157986	439080	278933	164590	74564.1	117360	111584	148916	132543	84196.2	122270	124598	143188	25267.3	0	36100.2	0	13187.5	190502	53862.5	94210.8	126080	187890	167553	74284.8
p1565	363.058	16.4149	C10H14N5O8P	GMP	8	Nucleotide Metabolism	Purine metabolism__Glutamate metabolism	4547148	0.590425	1	1.99499	2.27261	0.776929	1.60599	2.19859	0.255702	0.561461	0.0653898	0.407226	0.262044	0.763808	1.18027	940016	798035	861669	1.29971e+06	658538	1.79911e+06	1.34558e+06	1.18069e+06	2.20658e+06	1.18783e+06	2.7957e+06	2.96404e+06	2.95575e+06	3.80673e+06	2.87868e+06	3.95976e+06	4.54715e+06	3.89871e+06	2.79894e+06	2.33958e+06	1.49932e+06	756970	1.14731e+06	1.30521e+06	1.28893e+06	2.02109e+06	2.59259e+06
p2987	522.991	18.5523	C10H16N5O14P3	GTP	10	Nucleotide Metabolism	Purine metabolism__Riboflavin metabolism__Folate biosynthesis	1110270	0.67422	1	1.34879	2.66776	0.825012	1.17883	2.62997	0.574309	0.60898	0.170111	0.620692	0.429042	0.70488	1.28264	209333	122174	254862	132382	120080	275364	209666	215871	313925	229324	317221	413684	257760	338550	350888	511418	1.11027e+06	571540	561492	564372	224648	228405	205869	196316	171202	293838	296601
p2050	135.055	9.67995	C5H5N5	Adenine	10	Nucleotide Metabolism	Purine metabolism__Zeatin biosynthesis	8272413	1.11166	1	0.909617	0.735712	0.900581	0.856344	0.795607	1.29074	1.12667	1.13239	1.19878	1.26858	0.944641	0.944399	6.47556e+06	6.42917e+06	6.56512e+06	5.37234e+06	5.33493e+06	5.74764e+06	4.82519e+06	5.77786e+06	4.23734e+06	6.55796e+06	6.21854e+06	5.04204e+06	5.35744e+06	4.05715e+06	4.01729e+06	3.66338e+06	4.37486e+06	4.38113e+06	3.79727e+06	3.75498e+06	5.69383e+06	3.46974e+06	5.88791e+06	4.34032e+06	5.05536e+06	3.99109e+06	5.29151e+06
p3889	254.09	22.7383	C11H14N2O5	nicotinamide riboside	8	Nucleotide Metabolism	pyridine nucleotide cycling (plants) __ NAD salvage pathway II __ NAD salvage pathway III	153134	2.15102	1	1.68149	1.07486	0.611959	1.36553	1.05794	0.556735	0.803536	0.361419	0.423419	0.576652	0.77456	0.99365	23831.9	86466	55611.4	153134	107188	36990.1	39623.2	35068.2	54503.1	31968.5	60853.7	58267.2	55268	91327.1	67476	36029.4	56815.4	54645.5	33402.4	32094.7	24328	20444	18911.4	29259.4	28318.8	50308.6	63671.6
n1201	112.027	9.88299	C4H4N2O2	Orotate(Fragment)	6	Nucleotide Metabolism	Pyrimidine metabolism	8308981	0.945778	1	1.36904	1.19738	1.09861	1.34848	1.19924	0.771846	1.08079	1.08316	0.866034	0.890064	1.05881	1.01568	4.95635e+06	4.97534e+06	5.72602e+06	5.97934e+06	5.41227e+06	5.65604e+06	5.50976e+06	5.52454e+06	6.55879e+06	5.35095e+06	8.30898e+06	7.62357e+06	7.45567e+06	8.14763e+06	7.61871e+06	7.27223e+06	5.54308e+06	6.66229e+06	7.37591e+06	7.39167e+06	5.51696e+06	7.64855e+06	5.3044e+06	6.31784e+06	6.63268e+06	7.69297e+06	7.32435e+06
n1726	126.043	7.5934	C5H6N2O2	Thymine	8	Nucleotide Metabolism	Pyrimidine metabolism	2112974	1.38627	1	1.10095	1.50646	0.671689	0.841381	1.5433	0.475691	0.446696	0.335453	0.524127	0.314323	0.748034	0.822602	1.88603e+06	1.22289e+06	966366	1.68331e+06	1.06048e+06	1.14809e+06	548226	796032	1.40703e+06	1.01962e+06	1.85113e+06	773988	965436	1.07286e+06	752146	1.67398e+06	1.49106e+06	1.78313e+06	1.2652e+06	1.1969e+06	922284	368569	505654	797282	710247	1.04314e+06	705002
n1728	242.091	7.59972	C10H14N2O5	Thymidine	8	Nucleotide Metabolism	Pyrimidine metabolism	410000	1.53718	1	1.12181	1.5163	0.681286	0.879537	1.47436	0.483429	0.389919	0.314323	0.43142	0.271754	0.740616	0.821862	361814	292695	205162	354269	217205	231917	141440	143444	233818	180404	322884	116889	219878	215220	169557	294423	269829	332757	246607	268091	151802	64318	88713.9	168351	161108	171287	123540
n2031	322.057	12.8122	C10H15N2O8P	dTMP	10	Nucleotide Metabolism	Pyrimidine metabolism	3229370	1.34872	1	0.796141	0.618839	0.820581	0.658688	0.565757	0.539151	0.339423	0.133544	0.658515	0.254719	0.513347	0.649637	1.43152e+06	2.33313e+06	1.30511e+06	3.22937e+06	1.94775e+06	1.78979e+06	1.22106e+06	1.2158e+06	2.11291e+06	1.25792e+06	1.50096e+06	1.20662e+06	1.05316e+06	1.27536e+06	1.01256e+06	1.03879e+06	940431	1.25282e+06	829932	639649	1.52939e+06	885659	1.17231e+06	1.4361e+06	1.21089e+06	1.00294e+06	1.05087e+06
n2352	402.023	14.2777	C10H16N2O11P2	dTDP	6	Nucleotide Metabolism	Pyrimidine metabolism	326741	1.07242	1	1.25963	2.31205	0.790667	1.11957	2.21892	0.615209	0.623164	0.186641	0.59766	0.428851	0.970265	1.11726	98105.8	114220	97225.3	170439	109708	88335.3	74771.4	71367.5	206649	108755	119007	132524	123464	167786	149861	299118	234815	301830	215982	219604	88677.4	73788.9	69362.2	108252	94689.9	114680	113540
n2540	156.017	9.90409	C5H4N2O4	Orotate	8	Nucleotide Metabolism	Pyrimidine metabolism	638668	1.13617	1	1.8061	1.89089	0.689243	1.24777	1.82881	0.750417	0.51174	1.3698	0.747052	0.625554	3.56834	1.21798	81454.4	67594.1	138153	53374.9	41735.9	46856.6	43816.1	54065.6	131291	60462.8	39807.5	24565.8	28190.9	158881	356295	75078.8	174554	184509	114242	87886.2	35311.4	89595.5	30255.1	37868.6	38894.6	54243.3	37689.2
n2611	244.069	13.9257	C9H12N2O6	Pseudouridine	8	Nucleotide Metabolism	Pyrimidine metabolism	550036	0.670139	1	1.78189	1.18629	1.06906	1.59893	1.13189	0.524696	0.764983	0.615913	0.58939	0.581714	0.584342	0.969589	158559	158668	214194	211226	153439	245730	227741	208173	396250	259270	550036	418939	368490	540636	504581	356663	241795	280495	349062	358254	270253	397763	210571	273967	276955	474696	386196
n2793	483.968	17.1965	C9H15N2O15P3	UTP	10	Nucleotide Metabolism	Pyrimidine metabolism	385954	0.592105	1	1.05648	1.04479	0.83909	0.915404	1.06156	0.460889	0.603555	0.111762	0.481597	0.392199	0.459156	0.733525	170191	114310	149479	181699	138538	240393	188294	194295	385954	264855	275517	278880	176637	296192	318504	194888	327052	226902	289358	292647	190406	268708	140089	248596	221024	209965	215388
n3116	146.069	12.2515	C5H10N2O3	3-Ureidoisobutyrate	8	Nucleotide Metabolism	Pyrimidine metabolism	127372	1.12601	1	1.33765	1.35112	1.16151	1.19433	1.16188	0.901707	0.687494	0.861052	0.913409	0.633705	0.927941	1.26108	79022.7	58851.8	60903.7	73361.7	68856.8	69015.6	51401.7	59346.2	60346.6	62726.1	79687.1	80097	74108.6	94321.6	76873.7	67289	72662.6	78239.2	77022.1	113955	62953.7	127372	45756.1	53497.8	62167.9	73106.6	77748.4
n3225	308.041	13.5569	C9H13N2O8P	dUMP	10	Nucleotide Metabolism	Pyrimidine metabolism	123057	0.517243	1	0.560161	0	1.28322	0.544337	0	0.784156	0.620619	0.0144088	1.03796	0.907266	0	0.456589	39416	55017.1	36113.7	19165.4	16819.9	73017.9	48374.4	97614.9	45604.3	57349.4	53770.8	29565.9	29320.1	33656.9	34036.3	0	0	0	0	0	116196	74367.8	78098.4	77251.2	67234.6	43733.4	35971
p1592	243.085	11.8991	C9H13N3O5	Cytidine	10	Nucleotide Metabolism	Pyrimidine metabolism	14625320	0.770823	1	0.889776	1.18313	0.784485	0.694696	1.08833	0.388217	0.342535	0.278349	0.523091	0.216169	0.399632	0.670818	7.24524e+06	7.04932e+06	6.85822e+06	7.48109e+06	5.33829e+06	9.95124e+06	1.00523e+07	7.76203e+06	1.01285e+07	6.17851e+06	7.946e+06	7.94267e+06	7.8193e+06	8.88686e+06	6.6199e+06	9.42395e+06	1.46253e+07	1.09859e+07	8.20961e+06	8.89857e+06	7.82271e+06	5.52516e+06	6.77847e+06	7.88443e+06	6.56349e+06	5.02911e+06	6.5056e+06
p1966	323.052	15.5986	C9H14N3O8P	CMP	8	Nucleotide Metabolism	Pyrimidine metabolism	3684383	0.726443	1	1.57868	2.14307	0.92285	1.29421	1.92742	0.390008	0.531203	0.300261	0.586739	0.413217	1.17051	1.10231	716447	919302	912574	1.08152e+06	753594	1.11411e+06	1.11635e+06	927842	1.8529e+06	1.0229e+06	2.0735e+06	1.77142e+06	1.54493e+06	2.42251e+06	1.71357e+06	2.54255e+06	3.68438e+06	2.7839e+06	2.11257e+06	1.8081e+06	1.09872e+06	923864	998699	1.36813e+06	1.17917e+06	1.27785e+06	1.68216e+06
p2083	403.018	16.6177	C9H15N3O11P2	CDP	8	Nucleotide Metabolism	Pyrimidine metabolism	1699068	0.583024	1	1.50024	2.94558	0.836524	1.29309	2.80578	0.434857	0.712801	0.313696	0.560328	0.515277	1.16367	1.40464	242587	198643	249055	234858	163581	287658	306718	314072	563969	394958	489647	557944	440101	727584	586227	1.01212e+06	1.69907e+06	955123	969857	864340	304936	375523	230020	337142	314482	382499	507265
p2109	244.07	9.88294	C9H12N2O6	Uridine	10	Nucleotide Metabolism	Pyrimidine metabolism	6167383	0.990963	1	1.49158	1.47739	1.1978	1.41044	1.50175	0.730471	1.18403	1.27966	0.846914	0.942535	1.18231	1.20927	2.17289e+06	2.40983e+06	4.04093e+06	3.05608e+06	3.65451e+06	2.69206e+06	2.44738e+06	2.83385e+06	4.31141e+06	3.18938e+06	5.32471e+06	4.23515e+06	4.03156e+06	4.64526e+06	4.84414e+06	5.17159e+06	4.15855e+06	4.1818e+06	4.66961e+06	4.67971e+06	3.35166e+06	4.28577e+06	2.82467e+06	3.82349e+06	4.2493e+06	5.02246e+06	4.30756e+06
p2351	482.984	17.6877	C9H16N3O14P3	CTP	8	Nucleotide Metabolism	Pyrimidine metabolism	813298	0.431869	1	1.45411	2.99705	0.870422	1.18492	2.79422	0.350863	0.534886	0.246532	0.412439	0.374898	1.19927	1.42202	103432	47866.6	91457.9	64371.6	45369.6	148369	130534	124599	258250	154464	197481	312517	158871	262325	255673	356717	813298	388250	448054	439922	136878	194164	91107.6	168621	119681	151159	179904
p2535	128.059	14.7349	C5H8N2O2	5,6-Dihydrothymine	8	Nucleotide Metabolism	Pyrimidine metabolism	2918873	1.16281	1	1.85759	8.45572	1.61113	1.97725	8.05763	1.01073	1.67328	1.68088	1.12067	1.30959	1.64564	2.74761	226753	248692	441809	370749	327530	244595	212605	282156	347483	302494	373827	504212	498254	579428	625096	2.14402e+06	2.91887e+06	2.46831e+06	1.98166e+06	2.23494e+06	325017	868227	254552	404768	385834	527794	497260
p3001	227.091	10.4931	C9H13N3O4	Deoxycytidine	10	Nucleotide Metabolism	Pyrimidine metabolism	1466000	1.10966	1	0.809027	0.681852	0.788097	0.608434	0.665396	0.521544	0.338287	0.290502	0.649267	0.280607	0.38519	0.559622	1.466e+06	1.32935e+06	1.02013e+06	1.10282e+06	559805	1.43921e+06	699609	852316	1.12805e+06	817538	1.0794e+06	628909	787685	836114	661831	665211	870303	662263	572925	595413	1.16947e+06	462823	712444	733018	812862	565694	581387
p3782	307.057	14.6185	C9H14N3O7P	dCMP	10	Nucleotide Metabolism	Pyrimidine metabolism	200441	1.02952	1	0.988185	0.838674	1.14992	0.827029	0.760388	0.774876	0.63971	0.264421	0.978542	0.758121	0.697763	0.746159	134906	144764	137659	149267	82462.9	136837	100712	116555	154813	121530	176402	104234	79308.6	153436	109618	121856	85294.9	130008	87006.1	104575	200441	97777.7	138052	130979	157715	101138	108554
n749	112.027	8.66621	C4H4N2O2	Uracil	10	Nucleotide Metabolism	Pyrimidine metabolism__beta-Alanine metabolism__Pantothenate and CoA biosynthesis	20898719	1.57547	1	0.825516	0.944641	1.69699	0.904721	0.932342	1.39901	1.171	2.92724	1.52947	1.40629	1.66759	1.33888	7.68613e+06	6.42155e+06	1.29374e+07	5.64849e+06	7.76704e+06	4.18856e+06	5.69869e+06	6.13705e+06	4.14311e+06	5.51424e+06	4.10588e+06	4.14674e+06	4.08766e+06	4.50021e+06	4.3601e+06	4.2922e+06	3.71149e+06	8.49741e+06	3.75429e+06	4.00454e+06	4.88928e+06	2.08987e+07	5.99022e+06	5.67166e+06	6.13168e+06	3.612e+06	5.057e+06
n1275	324.036	14.8413	C9H13N2O9P	UMP	10	Nucleotide Metabolism	Pyrimidine metabolism__Peptidoglycan biosynthesis	8046457	0.904935	1	2.043	1.32765	0.866585	1.65406	1.33392	0.391143	0.621731	0.0963163	0.595306	0.357078	0.669493	0.899544	2.65557e+06	2.52999e+06	2.45333e+06	4.02834e+06	2.6582e+06	3.26524e+06	2.34063e+06	2.33101e+06	4.86827e+06	3.02519e+06	6.50875e+06	5.60687e+06	5.22213e+06	8.04646e+06	6.95716e+06	4.56545e+06	4.57114e+06	4.81848e+06	3.72542e+06	3.33662e+06	2.98138e+06	2.02566e+06	2.32613e+06	3.25448e+06	3.13068e+06	4.95977e+06	5.00727e+06
n2288	404.002	16.0647	C9H14N2O12P2	UDP	10	Nucleotide Metabolism	Pyrimidine metabolism__Peptidoglycan biosynthesis__Zeatin biosynthesis	1272988	0.833974	1	1.36451	1.08079	0.863112	1.21983	1.11453	0.540221	0.832628	0.170188	0.671103	0.513237	0.593007	0.889382	578329	622626	589008	734043	592300	679921	557573	586576	1.11175e+06	800872	1.03806e+06	892008	737303	1.1584e+06	1.27299e+06	676261	995106	686663	822885	857675	675392	616437	528938	699140	705279	856684	837749
n1276	118.027	14.7946	C4H6O4	Methylmalonate	6	Nucleotide Metabolism	Pyrimidine metabolism__Valine, leucine and isoleucine degradation__Propanoate metabolism	4873649	0.696218	1	1.26804	1.15992	1.15668	1.22751	1.09857	0.525531	0.763977	0.874059	0.797582	0.661983	0.892606	0.889025	1.27451e+06	2.36659e+06	2.0808e+06	2.92674e+06	2.63145e+06	3.05871e+06	2.92934e+06	2.77976e+06	4.09e+06	3.34413e+06	3.58744e+06	3.82888e+06	3.5638e+06	4.87365e+06	4.69091e+06	4.41665e+06	3.5625e+06	3.95457e+06	3.31873e+06	3.54051e+06	3.35082e+06	4.12377e+06	3.40621e+06	3.84373e+06	4.01595e+06	3.46672e+06	4.19358e+06
p3147	276.096	10.8387	C10H16N2O7	Thymidine glycol	8	Nucleotide Metabolism	Undefined	743655	0	0	29.4458	454.036	0	12.4704	469.867	0	0	0	0	0	16.7821	106.88	0	0	0	0	0	0	0	0	0	0	0	29922.3	21385.4	69234.3	26687.1	399980	514141	593558	407251	355248	0	0	0	0	0	0	0
p339	331.555	14.0566	C21H27N7O14P2	Fenugreekine	6	Nucleotide Metabolism	Undefined	21706223	0.811069	1	3.72171	5.0922	0.697613	2.9718	5.30207	0.456968	1.35754	0.285225	0.616668	0.835861	1.07444	1.9398	1.19506e+06	1.69443e+06	2.66536e+06	3.70618e+06	2.42586e+06	2.1292e+06	1.67733e+06	2.69477e+06	4.54411e+06	3.36385e+06	1.11914e+07	9.36644e+06	8.33009e+06	1.32432e+07	1.1496e+07	1.35579e+07	1.53197e+07	1.55852e+07	1.43914e+07	1.45207e+07	1.9473e+06	923777	1.88281e+06	2.78219e+06	2.516e+06	7.50199e+06	9.22136e+06
p3827	251.102	7.87214	C10H13N5O3	5'-Deoxyadenosine	10	Nucleotide Metabolism	Undefined	262022	0.820409	1	0.335431	0.168728	0.830017	0.347628	0.186292	1.20112	0.47644	0.411805	0.948394	0.682695	0.249255	0.546633	173191	121307	147983	142070	84235.5	194658	148724	135502	147401	188903	58816.8	50163.8	57641.5	49267.9	57549.8	26816.1	24716.4	44817.5	17335.4	23859.3	147845	115158	135092	123130	155396	59297.7	60730.3
n2230	248.101	14.6521	C9H16N2O6	Glu-Thr	8	Peptide(di-)	Acidic peptide	1335832	0.832005	1	1.42754	1.70032	1.39556	1.29431	1.61483	0.747739	0.791412	0.942447	0.807392	0.633583	0.675488	1.13791	341796	301859	558668	328914	294454	418308	468230	383662	531472	392654	586367	537114	567051	730243	711716	921924	457788	747116	769199	835028	422307	1.33583e+06	384632	481196	438344	556067	568572
n2911	230.09	11.3449	C9H14N2O5	Aspartyl-L-proline	8	Peptide(di-)	Acidic peptide	221364	0.775329	1	1.39687	1.02801	1.24651	1.38074	1.07848	0.739591	1.0072	0.874708	0.867987	0.86336	0.779915	0.966663	76935.3	87586.5	92840.5	96931.4	87519.7	106616	99188.4	99710.8	150929	113396	170453	135741	161186	159412	169199	129439	75019.4	113534	128221	139588	124098	221364	108153	122414	134281	156225	147012
p1443	248.101	15.8301	C9H16N2O6	Glu-Thr	6	Peptide(di-)	Acidic peptide	6264312	0	0	23.3897	3034.07	0	16.024	4087.15	0	5.58498	20.3344	0	0	1274.38	768.227	0	0	0	0	0	0	0	0	0	0	0	18704.1	0	56185.3	42058.9	3.38804e+06	3.66663e+06	3.20244e+06	2.65968e+06	2.25354e+06	0	0	0	0	0	25671.9	28899.8
p2020	247.08	15.7499	C8H13N3O6	Asn-Asp	6	Peptide(di-)	Acidic peptide	310138	0	0	8.73565	167.931	10.3238	14.7067	197.692	0	3.63101	0	0	0	2.96067	74.6957	0	0	0	0	0	0	0	0	0	0	17073.1	0	0	26605.1	0	203424	209564	146483	164782	115402	0	15256.8	0	18034.7	18327.8	15643.8	18513.8
p2141	218.09	14.8483	C8H14N2O5	L-Ala-L-Glu	8	Peptide(di-)	Acidic peptide	6040813	1.35185	1	0.844471	19.2439	1.25273	0.826158	19.1891	0.985461	0.726769	1.48486	0.990387	0.676601	1.13404	4.35176	292520	274937	545372	275834	255411	211587	250189	219327	285270	249793	197676	199033	195185	240955	194168	4.03277e+06	6.04081e+06	4.97292e+06	3.75436e+06	4.60292e+06	210771	631179	206230	230333	245019	186461	189097
p2304	230.09	15.1369	C9H14N2O5	Aspartyl-L-proline	6	Peptide(di-)	Acidic peptide	364784	0.841915	1	1.0059	0.945281	1.25804	1.05289	0.901848	0.725651	0.705244	1.36408	0.868768	0.742158	0.744826	0.956308	127439	138459	183202	121853	117206	161451	152265	160028	190999	152630	168397	174161	141718	166239	171681	202862	98208.4	114267	189007	168304	204779	309658	186595	150709	176547	177466	154235
p2759	276.096	16.8509	C10H16N2O7	Glu-Glu	8	Peptide(di-)	Acidic peptide	1530923	0.613382	1	0.928573	0.802568	1.13542	0.980887	0.732826	0.498898	0.595157	0.43961	0.562629	0.396322	0.351587	0.754201	412198	517219	887653	604283	372937	876016	947946	770724	1.16281e+06	798050	778169	845386	737829	949058	919716	864466	638234	649246	773358	730832	967664	1.53092e+06	947629	832213	894043	870547	854991
p1282	309.169	14.2907	C15H23N3O4	Lys-Tyr	6	Peptide(di-)	Basic peptide	980959	1.35957	1	1.31922	2.06166	1.61349	1.43877	2.13996	0.817841	0.870394	1.28076	0.970544	0.793363	1.48152	1.52182	219146	176338	730784	169413	190209	166692	259047	210472	236908	219796	298286	282545	321568	299739	239662	395030	279967	704569	463238	410415	165320	980959	185154	217634	214343	277784	322491
p1470	283.164	16.2116	C12H21N5O3	Lys-His	6	Peptide(di-)	Basic peptide	1355352	1.14617	1	0.485506	1.15553	1.29898	0.411612	1.18069	0.797751	0.475929	1.87569	1.00919	0.54851	1.21904	0.568607	432532	229009	936715	172136	202189	452211	552188	318203	230898	167518	175531	202127	196317	141424	120166	393327	190684	404544	500118	500016	500135	899791	245948	347940	241758	149365	134957
p171	271.165	15.2922	C11H21N5O3	Pro-Arg	6	Peptide(di-)	Basic peptide	1679461	0.932147	1	1.68523	1.94001	1.35577	1.66206	1.96373	0.688296	1.00394	1.25072	0.743239	0.703412	0.972079	1.20971	558794	541162	1.13716e+06	596795	524539	577426	694704	773432	906486	650872	1.17741e+06	1.25584e+06	1.16348e+06	1.34554e+06	1.12947e+06	1.56901e+06	851423	1.23831e+06	1.67946e+06	1.6515e+06	683500	1.54754e+06	861628	825265	966796	1.10248e+06	1.18023e+06
p1832	268.154	8.19885	C12H20N4O3	His-Leu	8	Peptide(di-)	Basic peptide	8033710	1.41901	1	0.823642	1.12718	1.54954	0.847592	1.09175	1.16999	0.834008	1.49865	1.2134	0.986779	1.2947	1.02061	2.48652e+06	2.25815e+06	5.9015e+06	2.16251e+06	2.40794e+06	1.88307e+06	2.55654e+06	2.37479e+06	1.7562e+06	2.15276e+06	1.78572e+06	1.64843e+06	1.66978e+06	1.93318e+06	1.79511e+06	2.36216e+06	1.4353e+06	3.56235e+06	2.28763e+06	2.43973e+06	1.9543e+06	8.03371e+06	2.26895e+06	2.13567e+06	2.22369e+06	1.63288e+06	1.87695e+06
p2005	245.174	13.7497	C11H23N3O3	Lys-Val	8	Peptide(di-)	Basic peptide	5922788	1.15101	1	0.997417	1.67963	1.91717	1.04591	1.7003	0.832125	0.671669	1.81791	0.892525	0.609793	1.20624	1.21478	1.05136e+06	827472	2.61788e+06	803451	860880	895296	1.24315e+06	1.08635e+06	1.23585e+06	892081	976422	955005	919656	1.28767e+06	1.20015e+06	2.1533e+06	1.04515e+06	1.92992e+06	1.93723e+06	1.92503e+06	1.00236e+06	5.92279e+06	1.01257e+06	1.21572e+06	1.10864e+06	1.1554e+06	1.03413e+06
p216	203.127	17.0373	C8H17N3O3	Lys-Gly	6	Peptide(di-)	Basic peptide	530274	0.950734	1	4.44103	3.92103	1.27735	3.99706	3.77543	0.626774	2.19152	1.32646	0.830751	1.61214	2.44051	3.19173	83994	57093.9	157289	87280.1	77534.1	70963.7	126959	82499.6	131028	75743.9	371999	447648	426771	530274	386946	358774	305724	367833	394130	483837	86385.7	214928	92200.6	125857	102946	380083	386925
p2173	273.18	13.5732	C11H23N5O3	Val-Arg	8	Peptide(di-)	Basic peptide	4979895	1.60654	1	0.979694	1.23342	1.54467	0.950109	1.19021	1.11725	0.926076	1.32871	1.20199	0.995606	1.33516	1.15413	2.18642e+06	1.74486e+06	4.20034e+06	1.55415e+06	1.89158e+06	1.22575e+06	1.70616e+06	1.64039e+06	1.20446e+06	1.42965e+06	1.48653e+06	1.27157e+06	1.56868e+06	1.37949e+06	1.35379e+06	1.65645e+06	1.27193e+06	2.73453e+06	1.53163e+06	1.694e+06	1.22788e+06	4.9799e+06	1.54571e+06	1.48553e+06	1.89246e+06	1.16697e+06	1.44572e+06
p2174	259.19	13.4953	C12H25N3O3	Ile-Lys	6	Peptide(di-)	Basic peptide	3885616	1.18882	1	0.988458	1.77197	1.46412	0.993559	1.72803	0.852997	0.782908	0.931748	0.975259	0.706374	0.940964	1.22167	1.21764e+06	1.03819e+06	2.32319e+06	1.11696e+06	1.07874e+06	1.02516e+06	1.3091e+06	1.12554e+06	1.09505e+06	1.14382e+06	1.13583e+06	1.16513e+06	1.12484e+06	1.12206e+06	1.08505e+06	2.20117e+06	1.18771e+06	1.71502e+06	2.36859e+06	2.62537e+06	1.02111e+06	3.88562e+06	1.02546e+06	1.04471e+06	1.36664e+06	914137	1.20969e+06
p2188	252.122	12.1601	C11H16N4O3	Pro-His	8	Peptide(di-)	Basic peptide	4917171	1.2	1	0.8521	1.44613	1.50711	0.897536	1.48917	0.822585	0.662411	1.84137	0.929151	0.688434	1.28577	0.996597	1.27985e+06	1.13608e+06	3.3562e+06	1.01805e+06	1.21434e+06	1.20464e+06	1.59578e+06	1.44139e+06	1.30225e+06	1.12636e+06	1.21426e+06	1.13144e+06	1.0942e+06	1.1009e+06	1.14307e+06	2.26448e+06	983849	2.2202e+06	2.14965e+06	2.02809e+06	1.27907e+06	4.91717e+06	1.2288e+06	1.2936e+06	1.3344e+06	1.1632e+06	1.36744e+06
p2208	303.154	16.5929	C11H21N5O5	Glu-Arg	8	Peptide(di-)	Basic peptide	4695373	0.903249	1	1.00454	1.17523	1.54049	1.07814	1.13224	0.650416	0.724267	1.27129	0.798066	0.598308	0.785874	1.03607	1.19066e+06	1.11957e+06	3.05124e+06	1.24836e+06	1.09119e+06	1.41877e+06	2.05045e+06	1.67686e+06	1.9548e+06	1.42502e+06	1.39266e+06	1.75971e+06	1.79476e+06	1.7028e+06	1.91468e+06	2.21384e+06	1.0524e+06	1.66373e+06	2.35829e+06	2.73165e+06	1.58458e+06	4.69537e+06	1.92234e+06	2.49258e+06	2.43921e+06	1.89285e+06	1.65284e+06
p2209	233.137	16.6103	C9H19N3O4	Lys-Ser	6	Peptide(di-)	Basic peptide	1206799	1.1825	1	0.833772	1.65056	1.31821	0.918504	1.57892	0.737022	0.702469	1.19238	0.875467	0.588939	1.05586	1.0801	397602	317135	1.02205e+06	348360	293648	393864	505778	444590	360040	307392	336839	336361	378988	306391	318690	671135	304449	590480	787927	966386	384073	1.02207e+06	381194	451124	413332	395808	351118
p2225	259.19	12.6462	C12H25N3O3	Leu-Lys	6	Peptide(di-)	Basic peptide	1963198	1.21708	1	0.647796	0.997141	1.25404	0.72305	1.02076	1.17622	0.64746	1.34923	1.12628	0.708595	0.969821	0.862896	906048	748439	1.45778e+06	718147	715489	675867	867571	724615	720711	746333	429878	492158	495127	510271	492149	847015	430371	796358	847573	803103	669573	1.9632e+06	696064	667168	687949	511906	550355
p2229	287.196	13.2102	C12H25N5O3	Ile-Arg	8	Peptide(di-)	Basic peptide	4545179	1.16893	1	0.964347	1.19145	1.43651	0.952835	1.16484	1.14146	0.951089	0.871334	1.24687	0.982627	0.916336	1.13084	1.79206e+06	1.65223e+06	2.34764e+06	1.67449e+06	1.76232e+06	1.50511e+06	1.66964e+06	1.68199e+06	1.43983e+06	1.59849e+06	1.66406e+06	1.5492e+06	1.59375e+06	1.49932e+06	1.30723e+06	1.64166e+06	1.13076e+06	2.55402e+06	1.97324e+06	2.10685e+06	1.59295e+06	4.54518e+06	1.64093e+06	1.64379e+06	1.91849e+06	1.26263e+06	1.76522e+06
p2281	275.16	16.1011	C10H21N5O4	Thr-Arg	6	Peptide(di-)	Basic peptide	1109048	2.19574	1	0.962961	1.53866	1.89772	1.04594	1.54365	2.00952	1.10603	1.61231	1.36538	1.08709	1.46468	1.43585	608438	373050	1.10181e+06	270089	387667	191835	323619	273755	232553	226588	245908	298483	257324	191093	209304	336042	197963	487098	416810	482878	258059	1.10905e+06	407670	320268	273974	215598	317604
p2300	243.158	15.1466	C11H21N3O3	Lys-Pro	8	Peptide(di-)	Basic peptide	3751935	0.860491	1	0.97624	0.773666	1.17359	1.00523	0.758252	0.647789	0.635552	0.971223	0.695542	0.532755	0.563377	0.749223	1.82559e+06	1.81404e+06	2.70374e+06	2.04421e+06	1.71038e+06	2.09332e+06	2.38507e+06	2.39011e+06	2.61219e+06	2.25442e+06	2.0794e+06	2.28384e+06	2.03386e+06	2.49519e+06	2.564e+06	2.06923e+06	1.20982e+06	1.64915e+06	2.0976e+06	2.05325e+06	2.44567e+06	3.75193e+06	2.49585e+06	2.46192e+06	2.61683e+06	2.39908e+06	2.21763e+06
p2482	321.18	11.7286	C15H23N5O3	Phe-Arg	6	Peptide(di-)	Basic peptide	1497746	1.49929	1	0.987408	1.23947	1.60668	0.984136	1.20604	1.1557	0.977519	1.39517	1.25139	1.04059	1.17809	1.14238	441948	424001	1.09853e+06	429192	407936	348244	420680	433810	316424	349463	408282	367763	405051	348922	315073	417488	328283	811223	378014	381094	356630	1.49775e+06	361203	390301	396391	314233	434151
p2496	287.196	12.3181	C12H25N5O3	Leu-Arg	8	Peptide(di-)	Basic peptide	2721848	1.40722	1	0.874621	1.02248	1.28544	0.970654	1.0264	1.45796	1.02585	1.22206	1.26818	1.04879	1.00868	0.958506	1.32093e+06	1.11439e+06	2.5396e+06	955931	1.14466e+06	1.00391e+06	1.15333e+06	1.09251e+06	822661	955589	967198	883907	893797	846458	806231	889003	876376	1.54333e+06	904117	928225	920468	2.72185e+06	947398	906472	967001	749554	1.30631e+06
p2548	288.155	16.4168	C10H20N6O4	Asn-Arg	6	Peptide(di-)	Basic peptide	322799	1.29261	1	1.38713	2.08641	1.03808	1.48819	2.3688	1.36944	1.95563	1.23187	1.30224	1.55024	1.35792	1.65949	131668	107642	219363	120534	123772	131867	121269	129438	65422	95849.7	157372	162397	167446	142370	124797	248832	269196	168967	226157	221532	148965	143800	104437	70237.1	97114.2	171970	195516
p2843	289.139	18.1074	C10H19N5O5	Asp-Arg	6	Peptide(di-)	Basic peptide	382786	0.689252	1	1.31508	0.88503	1.17751	1.27716	0.803193	0.545941	0.720553	0.371092	0.657912	0.461042	0.437378	0.808352	69662	113553	159260	121832	98090.5	167228	146143	142080	203467	157035	242375	217106	185429	226147	201986	167957	126525	172211	128911	126539	177243	254496	181780	165500	181771	204350	217398
p2925	337.175	14.1285	C15H23N5O4	L-Tyrosyl-L-arginine	8	Peptide(di-)	Basic peptide	1082686	1.5513	1	1.06059	1.08888	1.49078	1.12614	1.20826	1.05271	1.20076	1.36638	1.19161	1.23383	1.20915	1.30968	281411	291331	1.08223e+06	349982	341880	323805	327717	319707	260649	280939	362189	317212	367196	296901	260974	304678	228434	543963	284145	286056	235866	1.08269e+06	277619	326528	332584	263877	410530
p2926	277.146	14.0376	C11H23N3O3S	Lys-Met	6	Peptide(di-)	Basic peptide	566295	1.64296	1	1.00377	1.42013	1.56881	1.11061	1.33111	0.782287	1.34508	1.21462	1.11601	1.02361	1.60601	1.44755	149688	137404	566295	180941	179748	136555	162052	151300	143850	145201	166492	143046	152113	163154	116938	189388	143471	215141	221575	279843	116442	556955	167710	172623	145555	166902	176311
p3177	293.174	11.8786	C15H23N3O3	Lys-Phe	8	Peptide(di-)	Basic peptide	638732	1.41452	1	0.907199	1.25186	1.55404	0.868664	1.25073	1.16123	0.831728	1.57173	1.17254	0.917346	1.25683	1.10418	201206	166181	429250	128739	157932	140110	180082	141741	149210	154704	140374	153981	161736	126107	112578	196398	116478	269509	181332	195015	134553	638732	111487	149198	156188	122341	127334
p3249	247.153	15.8716	C10H21N3O4	Lys-Thr	8	Peptide(di-)	Basic peptide	812094	1.61417	1	0.719701	1.1068	1.31788	0.787963	1.06461	1.77597	1.27668	1.91665	1.72389	1.3194	1.45862	1.10635	393313	338140	633664	164927	296468	166756	315004	287383	158548	203859	107504	180717	180508	187386	158263	221607	118224	189640	328522	394409	189709	572663	305298	208054	215522	153427	196990
p3391	260.149	16.4749	C10H20N4O4	Lys-Asn	8	Peptide(di-)	Basic peptide	807007	1.48882	1	0.344354	0.22056	0.95616	0.354871	0.251441	1.44133	0.399649	0.411976	1.66543	0.465756	0.288201	0.509185	623189	498393	773442	315437	438823	409299	393676	409239	195686	371546	107893	124719	143958	103159	133032	80068.1	50357.7	67430.5	91398.8	103220	534382	261895	349431	263550	292179	126213	130750
p3427	231.133	16.9516	C8H17N5O3	Gly-Arg	8	Peptide(di-)	Basic peptide	523264	1.61439	1	0.657546	1.11869	1.22978	0.720118	1.10226	1.40968	0.754496	1.13023	1.58319	0.67111	0.821959	0.948528	293740	233358	523264	197674	289142	228674	215221	185242	143057	179978	106054	146235	143696	122000	108112	246074	149994	185508	260944	222665	231224	395363	197460	179439	167474	123720	158718
p3668	259.19	21.839	C12H25N3O3	Ile-Lys	8	Peptide(di-)	Basic peptide	234232	0	1	4.74342	26.05	1.85058	3.80579	27.1461	0	1.90416	0.753252	0.303754	0.900477	2.6287	6.05727	0	0	0	0	0	0	8641.1	0	7841.94	10494.9	26487.3	20097.5	21662	32133.3	27587.5	181351	137557	142636	137258	103972	0	17360.2	0	20093	12471.6	19362	18947.9
p3783	302.17	16.1745	C11H22N6O4	Gln-Arg	8	Peptide(di-)	Basic peptide	164919	1.36903	1	2.5862	2.21198	0.750934	2.22141	2.60164	1.61504	2.07504	0.673145	1.0556	1.3942	0.589004	1.79566	68743.1	59022.8	89115	40127.1	44914.8	53229.9	48718.6	51919.5	23830.8	42838.3	97411.7	109230	143195	117592	102925	114443	113592	35096.6	106050	118641	44380.5	37811.8	23681.7	29896.5	29838.3	86689.7	87477.5
n1411	278.163	7.57212	C15H22N2O3	Ile-Phe	6	Peptide(di-)	Hydrophobic peptide	487468	0.972528	1	1.21775	0.873651	1.26765	1.21754	0.894686	0.49045	0.860728	0.676135	0.943317	0.743385	0.455318	0.884298	155431	219480	327017	216671	214284	307263	260849	208222	212156	176394	351314	282707	221954	312812	249754	269756	128877	207904	223441	187724	227411	487468	271346	260309	230134	405478	206394
n2122	245.137	8.88895	C10H19N3O4	Ile-Asn	6	Peptide(di-)	Hydrophobic peptide	359410	1.36319	1	0.725209	0.769335	1.25627	0.729202	0.73783	1.34032	0.748602	0.992098	1.18629	0.805772	0.799141	0.864316	186733	156620	268867	137583	175127	135709	151467	138292	109155	143880	98846.9	97445.8	98360.9	100942	96460.2	102440	67222.6	150576	100519	101238	121837	359410	117192	124181	129760	103717	105223
n2495	278.094	12.2572	C10H18N2O5S	Glu-Met	6	Peptide(di-)	Hydrophobic peptide	161377	1.54209	1	0.980815	1.29497	1.67099	1.00781	1.1527	1.09226	0.848608	1.55833	1.15135	0.922656	1.00658	1.09418	61894	37849.8	116620	41483.4	47819.9	37004.3	46030.5	44692	35874.6	34615.2	41287.2	44810.2	35984.6	34931.9	37399.9	49619.6	30910.7	77398.9	46736.9	52018.4	44586.5	161377	33323.2	48058.1	43873.4	37443.1	39783
n2575	236.083	9.06824	C8H16N2O4S	Met-Ser	6	Peptide(di-)	Hydrophobic peptide	186571	1.40009	1	1.09731	0.993915	1.57636	1.10034	1.09009	1.113	0.978338	1.2713	1.18896	0.945496	1.15488	1.07847	70981.8	62113.2	107650	53020.5	58834.8	47868.8	60889.7	47159.8	49895	46028.5	51205.2	53538.8	63686.3	57815	50102.7	22394.9	45745	84245	48230.4	49694	46616.7	186571	49095.1	57759.6	56949.3	52165.8	54939.9
n631	294.158	7.57111	C15H22N2O4	Ile-Tyr	6	Peptide(di-)	Hydrophobic peptide	4636799	1.33114	1	1.01304	0.851838	1.45266	1.04695	0.857976	0.975124	0.891353	0.998684	1.05724	0.910611	0.761862	1.05122	2.0054e+06	1.83728e+06	3.37771e+06	1.55413e+06	1.61242e+06	1.44462e+06	1.7353e+06	1.74527e+06	1.52935e+06	1.34851e+06	1.61591e+06	1.7097e+06	1.54427e+06	1.49208e+06	1.54284e+06	1.22841e+06	887250	1.63402e+06	1.36813e+06	1.52913e+06	1.61738e+06	4.6368e+06	1.54605e+06	1.71811e+06	1.81685e+06	1.36452e+06	1.65653e+06
n653	248.119	7.57021	C10H20N2O3S	Met-Val	6	Peptide(di-)	Hydrophobic peptide	1613163	1.12533	1	1.02001	0.942828	1.42347	1.05797	0.855346	0.845297	0.883351	1.25315	0.930017	0.741008	0.898738	1.09558	521932	493788	906110	414238	448980	467904	606006	515110	460743	425104	606659	536249	475908	427955	477612	573065	257712	577643	457023	467931	427660	1.61316e+06	423235	560767	498065	481531	468939
n658	328.142	7.5719	C18H20N2O4	Phe-Tyr	6	Peptide(di-)	Hydrophobic peptide	1253542	0.965341	1	1.06962	0.871373	1.38119	1.13982	0.841865	0.916868	0.899579	0.903036	0.921167	0.75606	0.692407	1.06397	453989	427844	764836	448421	308368	524175	535920	556801	493519	379334	640215	511427	477047	622284	412118	505537	285986	466042	429760	482177	488914	1.25354e+06	615467	552898	528005	653779	594899
n698	222.1	7.57447	C11H14N2O3	Phe-Gly	6	Peptide(di-)	Hydrophobic peptide	412189	1.71676	1	0.780418	0.903106	1.66763	0.70251	0.89172	0.863636	0.690348	1.23143	1.03111	0.773931	1.04112	0.550066	190731	138831	243369	203404	130585	117474	119680	153215	55662.9	82240.7	105889	123201	86565.7	46073.4	50545.1	79696.9	53478.6	121295	112548	110068	90242.9	412189	104533	163958	110041	54627.9	64598.8
p100	232.142	7.61562	C10H20N2O4	Ile-Thr	6	Peptide(di-)	Hydrophobic peptide	5229717	1.41843	1	0.719906	0.92418	1.19526	0.720915	0.904802	1.29246	0.89213	1.64562	1.16345	1.10875	1.10063	1.01243	2.07703e+06	2.22614e+06	4.60711e+06	1.99312e+06	2.06547e+06	1.67169e+06	1.80914e+06	2.32392e+06	1.48053e+06	1.85783e+06	1.0632e+06	1.2805e+06	1.69213e+06	1.22308e+06	1.32327e+06	1.90289e+06	1.04126e+06	1.85205e+06	1.68797e+06	1.96571e+06	1.61022e+06	3.66554e+06	2.07745e+06	1.84232e+06	1.73283e+06	1.27364e+06	1.15086e+06
p109	280.142	7.60049	C14H20N2O4	Val-Tyr	6	Peptide(di-)	Hydrophobic peptide	3184380	1.64524	1	0.808445	0.975715	1.22018	0.822259	0.844039	1.5684	0.991539	1.81883	1.44718	1.22875	1.30796	0.995036	1.92162e+06	1.72981e+06	3.18438e+06	1.33305e+06	1.54162e+06	978602	1.39317e+06	1.37965e+06	991320	1.15943e+06	987131	904763	963655	1.12256e+06	793476	1.25464e+06	873087	1.76152e+06	909864	959733	1.02265e+06	2.63682e+06	1.10662e+06	1.19258e+06	1.24304e+06	781898	1.00775e+06
p111	216.147	7.5766	C10H20N2O3	Val-Val	6	Peptide(di-)	Hydrophobic peptide	2892623	1.32387	1	0.624032	0.949074	1.32217	0.903923	0.874299	1.35425	0.835776	1.77872	1.292	1.11949	1.14733	1.06423	1.33972e+06	1.1563e+06	2.33081e+06	1.21996e+06	1.05248e+06	931954	1.15529e+06	1.22314e+06	825419	1.22668e+06	152924	714760	832392	858034	788262	1.62133e+06	696174	1.10014e+06	841960	829798	988289	2.60961e+06	1.08392e+06	1.20991e+06	1.19841e+06	864192	1.22454e+06
p132	266.127	7.60035	C13H18N2O4	Phe-Thr	6	Peptide(di-)	Hydrophobic peptide	743520	1.14772	1	0.719844	0.728522	0.965188	0.92863	0.587127	0.816588	0.449743	0.824177	0.841079	0.633027	0.871047	0.663335	260176	318407	624076	340360	382176	258013	436604	350897	419363	212524	319682	221481	188029	217378	260898	333759	131504	371231	155598	229931	227139	743520	129883	268048	250417	483224	204152
p1352	236.083	11.1672	C8H16N2O4S	Met-Ser	6	Peptide(di-)	Hydrophobic peptide	226245	1.26665	1	0.931579	1.37978	1.17134	1.00766	1.325	1.2583	0.983239	1.20101	1.10953	1.1421	0.95407	1.11492	119899	123000	213978	154626	139013	107751	124163	130715	106354	123541	108910	101616	115511	126622	99322.9	178469	177614	169537	137124	154804	139577	220143	116957	90582.3	126787	97592.2	123197
p1833	188.116	8.19833	C8H16N2O3	Glycyl-leucine	6	Peptide(di-)	Hydrophobic peptide	4514616	1.35515	1	0.860563	1.0494	1.58873	0.825446	1.28429	1.06987	0.827589	1.4437	1.05382	0.890984	1.21579	1.08472	1.40993e+06	1.10328e+06	2.50528e+06	1.03185e+06	1.13685e+06	1.00617e+06	1.10404e+06	1.11841e+06	961922	1.11305e+06	951741	874189	873515	878954	985680	1.09e+06	744864	1.51231e+06	1.22734e+06	991087	928747	4.51462e+06	956141	1.00579e+06	1.0207e+06	786002	947787
p1839	220.088	8.18618	C8H16N2O3S	Met-Ala	6	Peptide(di-)	Hydrophobic peptide	515420	1.36784	1	0.804281	0.946385	1.3885	0.836015	0.919951	1.11902	0.951823	1.3805	1.10261	0.995465	1.23598	1.09232	165876	210033	420418	168507	170556	127556	213446	191486	139038	158534	140263	129907	146310	134566	116554	136223	94047	277651	134245	143391	151442	515420	153453	168446	163780	128177	158568
p2718	291.122	9.33128	C14H17N3O4	Trp-Ser	6	Peptide(di-)	Hydrophobic peptide	248463	1.04809	1	1.09184	0.949623	1.2201	1.1499	0.965494	0.871986	0.91745	1.03598	0.822465	0.732763	0.899221	0.908531	144077	126411	248463	140110	158356	153725	150472	155579	178988	141145	190997	155840	155738	185717	163246	158633	111994	121708	153182	195103	206358	215951	161069	175719	192466	165894	186989
p3421	245.137	9.75615	C10H19N3O4	Ile-Asn	8	Peptide(di-)	Hydrophobic peptide	555540	1.38946	1	0.634028	0.815451	1.17545	0.659663	0.716616	1.86996	0.733245	1.16513	1.69176	1.11756	0.857962	0.843474	320936	261696	477233	211562	250124	231869	255044	198916	159877	249364	133228	132876	149087	137145	141968	219520	94200.6	174500	201144	203610	275332	402958	221593	188357	198955	146489	146211
p368	259.153	14.0705	C11H21N3O4	Ile-Gln	6	Peptide(di-)	Hydrophobic peptide	407755	1.58708	1	5.18189	13.6316	1.47588	4.59805	12.8386	0.208958	2.36636	0	0.66657	0.793281	0	4.43708	0	0	27893.8	77090.2	74342.5	0	0	0	82986.3	30004.8	76435	124632	100160	153395	130884	258546	405958	350859	273282	251600	32235.9	16674.5	29314.5	37405.6	51130.7	88865.2	125425
p3764	202.132	11.7454	C9H18N2O3	Ile-Ala	8	Peptide(di-)	Hydrophobic peptide	177003	0	0	2.71248	111.772	0	3.82599	99.7393	0	0	0	0	0	10.2627	26.666	0	0	0	0	0	0	0	0	0	0	0	0	0	0	13562.4	138607	103617	147232	91718.1	77688.4	0	0	0	0	0	0	0
p3803	282.122	12.4858	C13H18N2O5	Thr-Tyr	8	Peptide(di-)	Hydrophobic peptide	167077	0.805811	1	1.18109	0.913827	0.998372	1.05505	0.859301	0.885595	1.039	0.891491	0.990934	0.838804	0.789303	0.722028	86271.5	72822.6	123721	89229.4	68867.5	108259	84555.9	129629	101870	122852	167077	124556	121163	107778	125677	89153.1	128460	85563.6	100498	96340.6	144053	105128	100571	85482.6	111041	122170	116169
p644	344.137	8.08967	C18H20N2O5	Tyr-Tyr	6	Peptide(di-)	Hydrophobic peptide	242788	1.19361	1	0.826373	0.915528	1.1923	0.866211	0.875351	1.26342	1.02591	1.12444	1.29422	1.1902	0.921348	0.954685	125859	152797	202399	120614	129819	135313	135976	140997	97537.3	103013	112475	94198	111041	90226	98491.5	91915.9	98021.7	162844	104387	103900	117964	242788	137157	100295	132479	96790.3	128797
p746	275.127	7.66748	C14H17N3O3	Trp-Ala	6	Peptide(di-)	Hydrophobic peptide	975856	0.86252	1	1.20247	0.966581	1.05078	1.13905	0.9224	0.687991	0.861763	1.07621	0.764062	0.796775	0.965215	1.00339	341485	453932	712335	583504	427713	561199	516765	610688	686598	545225	710942	678209	652410	848626	621586	708730	484633	606745	529401	493367	577072	634488	608407	586074	662734	795478	678566
p83	230.163	7.54966	C11H22N2O3	Ile-Val	6	Peptide(di-)	Hydrophobic peptide	14418525	1.73001	1	0.810694	0.943334	1.35798	0.854124	0.87304	1.29816	0.885644	1.5059	1.24858	1.06187	0.943382	1.31309	5.83686e+06	5.86826e+06	1.44185e+07	3.86901e+06	4.25872e+06	4.15336e+06	4.91223e+06	3.58474e+06	3.23574e+06	3.91231e+06	3.63842e+06	3.05385e+06	3.21992e+06	3.04814e+06	3.09009e+06	4.47182e+06	2.09797e+06	5.16168e+06	3.16352e+06	3.78149e+06	3.84813e+06	1.15334e+07	3.8565e+06	3.93231e+06	3.71549e+06	2.9605e+06	3.73683e+06
p2394	186.1	11.4539	C8H14N2O3	Ala-Pro	8	Peptide(di-)	Nonpolar peptide	3309324	1.40553	1	0.85488	1.18038	1.48122	0.891253	1.15916	1.08223	0.855242	1.56734	1.1761	0.897568	1.22601	1.05909	1.34288e+06	1.29403e+06	2.37041e+06	1.12278e+06	1.1189e+06	918301	1.06189e+06	1.18065e+06	946443	1.05019e+06	877422	904126	866381	936162	824928	1.35836e+06	693007	1.50528e+06	1.31266e+06	1.21845e+06	1.0725e+06	3.30932e+06	1.03651e+06	1.07214e+06	1.14887e+06	830270	914471
n1340	176.08	13.0263	C6H12N2O4	Ala-Ser	6	Peptide(di-)	Polar peptide	736552	0.76768	1	1.38729	1.39064	1.40362	1.36842	1.32854	0.668083	0.783031	1.07584	0.70643	0.733496	0.799985	1.04575	201346	167378	225549	179879	172268	211292	321239	218090	331760	150452	263196	384561	315576	396857	350110	373673	186209	334654	406726	413167	204006	736552	172174	326894	290804	326056	363241
p1525	229.106	10.9968	C9H15N3O4	Asn-Pro	6	Peptide(di-)	Polar peptide	1412360	0.821885	1	1.36675	1.17119	1.22209	1.40419	1.14236	0.707573	1.14523	1.03077	0.807924	0.895845	0.942388	0.96417	477611	563405	814027	623262	635477	759138	762457	651507	889400	726085	1.1522e+06	1.02103e+06	919185	971303	1.11432e+06	951295	598663	941380	868605	1.0772e+06	726027	1.41236e+06	844611	792394	854605	1.10836e+06	1.0987e+06
p1847	172.085	12.4824	C7H12N2O3	Glycylproline	6	Peptide(di-)	Polar peptide	3311811	1.21561	1	0.928472	1.29062	1.47009	1.00956	1.25205	1.07019	0.844637	1.6791	1.07283	0.864582	1.15581	1.02306	1.30537e+06	1.13077e+06	1.9251e+06	1.0472e+06	1.03391e+06	1.05551e+06	1.18044e+06	1.06272e+06	1.03272e+06	968273	991928	992097	912059	1.03852e+06	985996	1.48069e+06	850857	1.5402e+06	1.4342e+06	1.53392e+06	1.08992e+06	3.31181e+06	1.07046e+06	1.19495e+06	1.12384e+06	1.16587e+06	974998
p3449	243.122	16.0462	C10H17N3O4	Gln-Pro	6	Peptide(di-)	Polar peptide	120378	0.841558	1	1.41769	0.4931	1.1394	1.63136	0.44154	0.524438	1.41402	0.724969	0.729572	0.962887	0.724587	1.08923	25468	55209.2	84228.8	71750.5	47157.3	60486.9	54515.7	62370.8	92475.9	67399	102062	86557.6	96575.3	102098	90818.8	41063.2	22302.9	0	50362.2	52569	72240.5	91412.3	61797.8	70288.9	88521.8	101607	107070
p3481	247.117	18.2177	C9H17N3O5	Thr-Gln	6	Peptide(di-)	Polar peptide	181252	0.241118	1	3.72411	4.24602	0.731142	3.23061	4.29037	0.165565	0.774318	0	0.595368	0.126901	0.5288	1.97355	0	0	0	37402.1	0	47776.5	28002	0	57215.5	22125.4	109240	117075	94477.9	142798	114091	146279	160899	146906	114551	90004.6	36802.8	18314.7	0	39858.7	18438.2	96896.5	110731
p447	189.075	16.082	C6H11N3O4	Asn-Gly	6	Peptide(di-)	Polar peptide	282904	0	0	60.4793	224.452	0	48.5968	216.977	0	5.14815	0	0	0	80.6455	71.6778	0	0	0	0	0	0	0	0	0	0	0	69132.3	53362.9	91712.9	88188.3	209664	282904	226850	212601	190240	0	0	0	0	0	21071.6	28999.1
n1669	389.155	15.2273	C14H23N5O8	Ala-Ala-Asn-Asp	6	Peptide(tetra-)	Acidic peptide	109935	0.387748	1	0.757996	2.4471	1.11543	0.737936	2.78216	0.488289	0.426506	0.538015	0.598743	0.393737	0.248369	1.20617	8143.22	13233.5	13263.7	11587.3	7229.36	25949.4	33523.6	27156.7	33226.8	18009.5	16106.6	21950.7	20515.7	20912.1	25016.6	82654.8	60800.9	63681	72165.5	58070.3	29864.8	43630.6	33380	24764.8	22140	19960.5	21578
p2021	503.197	15.7104	C18H29N7O10	Asn-Asp-Gln-Gln	6	Peptide(tetra-)	Acidic peptide	240274	0	0	15.5955	182.676	0	0	193.682	0	0	0	0	0	0	67.5597	0	0	0	0	0	0	0	0	0	0	0	29215.3	0	28322.7	20439.4	202000	224775	140761	193250	152593	0	0	0	0	0	0	0
p2055	533.196	16.3625	C20H31N5O12	Gln-Glu-Glu-Glu	8	Peptide(tetra-)	Acidic peptide	6086952	0	1	32.1243	63.9515	0.77905	26.9309	74.2947	0.317124	7.54795	1.70024	0.582196	2.23496	41.5552	17.2123	0	0	0	0	0	36622.3	0	34917.8	152815	62241.9	1.56348e+06	2.17115e+06	1.27359e+06	2.44032e+06	1.75818e+06	4.62603e+06	4.5369e+06	3.23189e+06	3.51296e+06	2.42057e+06	0	41235.6	38648.8	97859.3	45529.8	1.37777e+06	1.37297e+06
p2097	376.123	16.6443	C13H20N4O9	Ala-Asp-Asp-Gly	6	Peptide(tetra-)	Acidic peptide	152815	0.675661	1	1.13975	0.92532	1.19605	1.06471	0.8914	0.605822	0.753538	0.764701	0.658731	0.631434	0.545492	0.887245	66603.6	53598.6	105962	69601	49478.3	112031	87785.2	78511.2	139981	92663.3	137818	103971	111597	108761	120230	109063	78071.7	86677.3	91265.5	107734	118071	152815	117110	110341	112811	101753	97422.4
p2919	375.138	15.5373	C13H21N5O8	Ala-Asn-Asp-Gly	6	Peptide(tetra-)	Acidic peptide	501506	0.755525	1	0.904639	2.87679	1.12629	0.86838	3.13371	0.793281	0.988327	1.59471	0.873144	0.95431	0.770348	1.32891	86320.2	86540	144839	88955.7	79315.8	130901	112251	104792	141219	154059	95705.2	114242	125394	129749	116795	434449	448952	289130	376571	301312	122968	199759	145574	119788	136366	115592	114919
p370	435.142	14.1513	C15H25N5O8S	Ala-Asp-Cys-Gln	6	Peptide(tetra-)	Acidic peptide	364738	0	0	36.5819	295.246	0	19.3308	284.655	0	0	0	0	0	0	53.5705	0	0	0	0	0	0	0	0	0	0	0	41617.2	31608.7	68375.9	41307.8	307998	364738	248322	283508	271664	0	0	0	0	0	0	24946.9
p3763	448.156	16.527	C15H24N6O10	Asn-Asn-Asp-Ser	8	Peptide(tetra-)	Acidic peptide	177156	0	0	0	89.52	0	0	114.546	0	0	0	0	0	0	29.2702	0	0	0	0	0	0	0	0	0	0	0	0	0	0	0	122003	81064.9	79949.3	97890.2	66693	0	0	0	0	0	0	0
p3767	372.164	14.6943	C15H24N4O7	Ala-Ala-Asp-Pro	8	Peptide(tetra-)	Acidic peptide	219186	0.696104	1	0.819033	0.67188	1.08938	0.847396	0.710826	0.557632	0.680495	0.638572	0.631749	0.583276	0.510523	0.659369	90614.1	117648	123090	152951	112712	206388	152879	175638	168500	154247	146772	124846	136976	123101	170750	121435	116083	113173	110534	115015	177329	160388	219186	202438	174972	151030	108798
n1229	533.206	16.0791	C23H31N7O6S	Cys-Phe-Gln-His	6	Peptide(tetra-)	Basic peptide	4069280	0	1	907.024	2825.2	0	767.436	2746.93	0	157.82	0.959931	0	38.0017	670.938	1043.01	0	0	0	0	0	0	0	0	6134.17	0	965212	1.23309e+06	1.01012e+06	1.22837e+06	1.12705e+06	3.65319e+06	3.76955e+06	3.58626e+06	3.17216e+06	3.14911e+06	0	0	0	0	0	998959	1.04821e+06
n1245	531.19	16.0938	C23H29N7O6S	Cys-Trp-Ser-His	6	Peptide(tetra-)	Basic peptide	117887	0	0	24.8869	107.806	0	20.4497	106.857	0	3.93909	0	0	0	28.6553	35.0167	0	0	0	0	0	0	0	0	0	0	9209.95	30244.3	25944.1	32429.2	26606.9	107812	117612	104371	106680	102556	0	0	0	0	0	8563.55	16848.3
n1692	624.35	14.7446	C30H44N10O5	Arg-Phe-Phe-Arg	6	Peptide(tetra-)	Basic peptide	176819	0.586326	1	1.1938	0.748238	0.676153	0.804872	0.76891	0.582373	0.552812	0.166496	0.515699	0.300828	0.262549	0.738355	62696.6	68501.4	40513	99258	74244.4	119950	112070	95245.8	150457	111050	104451	113223	141491	176819	166897	103304	88305.7	81607.6	90798.4	76526.9	115411	74750.8	69597	71733.6	66608.6	88121.6	105420
n2454	530.232	15.0513	C25H34N6O5S	His-Met-Phe-Pro	6	Peptide(tetra-)	Basic peptide	108990	0	1	3.76667	12.0599	0.866099	2.75271	10.5289	0	0	0	0	0	2.40732	4.45551	0	0	0	0	0	0	0	0	20219.7	12147.2	24795.1	24246.3	25572.6	29542	17759.8	108990	79540.1	52131.8	91572.9	58108.1	0	9989.59	0	5826.77	12216.7	13618.7	18830.5
n2811	566.281	20.9721	C24H38N8O8	Arg-Thr-Gln-Tyr	6	Peptide(tetra-)	Basic peptide	115391	1.14069	1	1.40799	0.459443	1.51351	1.26067	0.442178	1.0903	1.28864	1.12686	1.46549	1.32428	0.818235	1.03193	53222.6	50371.9	49805.6	37018.8	38612.2	42352.2	40831.2	47899.6	27236	42463.5	115391	47231.8	43040.8	39029.3	38007.2	17567.9	13596.7	30582.3	13436.5	17064.8	77639.5	82526.1	53797.5	40170.4	49753.5	86251.1	58667.4
n879	516.338	28.3632	C22H44N8O6	Arg-Leu-Lys-Thr	6	Peptide(tetra-)	Basic peptide	2479763	1.13342	1	0.636145	0.674692	0.917981	0.791901	0.725293	1.28538	1.03552	1.23197	1.15749	1.19281	0.914567	0.818701	1.90595e+06	1.87901e+06	1.88375e+06	1.76394e+06	1.81599e+06	1.67589e+06	1.53328e+06	1.65923e+06	1.57111e+06	1.72044e+06	1.28274e+06	1.07078e+06	1.16629e+06	864698	806398	1.04172e+06	1.03799e+06	1.05687e+06	1.10578e+06	1.2631e+06	1.63407e+06	1.1103e+06	1.81781e+06	1.46522e+06	1.46328e+06	1.30558e+06	1.28011e+06
p1077	513.238	11.8168	C21H35N7O6S	Asn-Leu-Met-His	6	Peptide(tetra-)	Basic peptide	457645	0.673125	1	1.02258	0.7564	1.14356	1.08448	0.720512	0.571279	0.766706	0.930857	0.623662	0.677469	0.804741	0.744652	124217	157765	237480	202712	213167	247221	278477	253977	335673	274203	352375	244778	255863	278193	289717	214546	136761	208663	235503	255582	271060	457645	276467	298839	285024	321366	254957
p1588	510.255	14.6152	C21H34N8O7	Asn-Leu-Gln-His	6	Peptide(tetra-)	Basic peptide	246838	0.651789	1	1.04456	0.80129	1.0198	1.00086	0.750005	0.476956	0.80381	0.90522	0.526251	0.594374	0.64456	0.759056	82887.4	117096	133573	102338	90501.4	156255	133247	153684	199684	164748	173564	142759	137498	204582	185199	131105	99877.3	130125	117254	168774	116684	213670	153541	167863	171849	150818	167256
p183	371.217	15.2665	C16H29N5O5	Ala-Lys-Gly-Pro	6	Peptide(tetra-)	Basic peptide	513586	0.384068	1	1.25335	0.793896	1.15773	1.09746	0.789103	0.448112	0.517701	0.147295	0.39063	0.31849	0.22209	0.665246	124607	133662	162140	166105	113830	304184	382523	375352	490361	271074	439335	513586	391422	459087	482046	347143	209402	253765	306870	330484	339989	499917	397947	458541	414711	388929	361991
p195	399.223	15.323	C16H29N7O5	Ala-Gly-Pro-Arg	6	Peptide(tetra-)	Basic peptide	262649	0.197293	1	1.45806	1.05537	1.10484	1.38329	1.08792	0.29775	0.540114	0	0.353654	0.205168	0	0.811537	0	26844.9	40975.6	77275.6	0	128895	176869	146135	187422	96114	202489	204330	230430	200031	235033	150400	75108.4	112029	229874	208742	136648	224771	143557	155159	152403	192185	177857
p2063	544.272	16.2685	C20H36N10O8	Arg-Asn-Gln-Gln	6	Peptide(tetra-)	Basic peptide	219481	0	0	93.9016	157.259	0	89.1201	171.79	0	57.4337	0	0	7.08789	10.8013	69.0377	0	0	0	0	0	0	0	0	0	0	79173	107347	84841	85306.4	112841	189306	167949	62092.6	158015	208930	0	0	0	0	0	69789.5	81808
p2353	417.197	17.6653	C15H27N7O7	Ala-Asp-Gly-Arg	6	Peptide(tetra-)	Basic peptide	551829	0	0	0	325.152	0	0	374.839	0	0	0	0	0	0	62.0094	0	0	0	0	0	0	0	0	0	0	0	0	0	0	0	420918	364380	281782	337211	221468	0	0	0	0	0	0	0
p2456	523.3	7.59992	C25H41N5O7	Ile-Lys-Thr-Tyr	8	Peptide(tetra-)	Basic peptide	4365585	0.545013	1	0.439825	0.195775	0.917013	0.51111	0.160002	0.578613	0.414487	0.626549	0.530972	0.347789	0.350936	0.444344	1.18809e+06	2.04276e+06	1.91139e+06	2.33564e+06	1.87548e+06	3.2833e+06	4.36559e+06	4.09046e+06	2.90883e+06	2.51355e+06	1.74152e+06	1.44631e+06	1.49983e+06	1.35638e+06	1.50411e+06	767811	511500	392441	790092	897997	3.07215e+06	2.94024e+06	3.99649e+06	3.06091e+06	2.66773e+06	2.20478e+06	1.5492e+06
p2927	385.232	14.1516	C17H31N5O5	Ala-Lys-Ala-Pro	6	Peptide(tetra-)	Basic peptide	238991	1.1443	1	1.5507	1.79016	1.42069	1.69705	1.70336	0.473108	1.38743	0.776684	0.688982	0.972705	1.39586	1.78162	33206.9	28629.9	158818	95004.9	75958.2	66584	75197.5	55490.1	71336.2	73625.6	125595	101802	114559	91613.8	97133	88837.1	100972	199961	106624	116260	57821.5	238991	29404.1	93938.7	66053	83460.6	119859
p2958	481.212	10.8523	C20H31N7O5S	Arg-Phe-Cys-Gly	6	Peptide(tetra-)	Basic peptide	839212	1.30638	1	0.771862	0.54059	0.969691	0.889562	0.534162	0.905601	1.06773	1.3797	1.27583	1.06947	0.859145	0.804155	436770	438531	742967	480079	455569	371918	374474	471321	333454	403787	280331	342342	312005	256726	317549	188822	243626	197426	197205	229749	429123	218702	428482	382385	437009	311047	360822
p3178	445.237	11.8629	C19H35N5O5S	Ala-Lys-Met-Pro	6	Peptide(tetra-)	Basic peptide	518170	1.5576	1	1.04272	1.46515	2.10543	1.09552	1.34641	0.982364	0.925696	1.45636	1.16911	0.994437	1.29042	1.17052	90637.5	71412.7	303724	78385.9	104533	62759.6	75045.1	90217.7	93603.1	94843.2	85333.5	79351.6	96125.4	92357	81090.9	107670	74112	192440	117215	118753	76167.8	518170	67738.6	92484.8	122285	64538	113391
p3425	496.264	9.7898	C22H36N6O7	Asp-Ile-His-Ile	8	Peptide(tetra-)	Basic peptide	395406	0.489008	1	0.652722	0.339648	1.23196	0.776544	0.389982	0.524036	0.517271	0.411789	0.506901	0.462189	0.344034	0.535011	108369	110841	187750	101249	83872.1	264203	318079	194806	243359	190332	162386	170906	120553	153942	182516	88858.8	68093.5	102212	73373.8	78700.6	262557	395406	269769	305476	258423	239367	143052
p3490	391.188	14.1125	C15H29N5O5S	Ala-Lys-Ala-Cys	8	Peptide(tetra-)	Basic peptide	564653	0.195457	1	4.37057	3.07588	0.722207	3.56682	3.28606	0.174044	3.09271	0.166541	0.0595069	1.40108	1.37739	2.33277	0	0	0	71055.9	0	73025	50824.1	58205.3	96134.5	85347.1	337609	319088	349836	285395	296933	323646	167128	171150	221757	234511	58946.6	35801.2	27191.2	71549.4	69059.9	307938	268192
p3534	532.25	15.2495	C21H36N6O10	Glu-Glu-Gln-Lys	8	Peptide(tetra-)	Basic peptide	534700	0	0	0	0	0	0	0	294.423	60.2888	123.317	219.632	83.9525	56.3122	51.2957	0	0	0	0	0	0	0	0	0	0	0	0	0	0	0	0	0	0	0	0	0	0	0	0	0	0	0
p3554	416.239	13.4237	C17H32N6O6	Ala-Lys-Ala-Gln	8	Peptide(tetra-)	Basic peptide	290321	1.24123	1	0.789646	1.01321	1.44083	0.863548	0.92574	1.14458	0.728303	0.776707	1.19095	0.639503	0.778912	1.0534	86145.2	90821.1	203086	100224	102071	83079	119906	82648.3	73730.2	109804	77225.5	68543.9	74243.5	69375.9	81087.7	75184.1	56996.4	128377	101390	113420	81932.2	290321	98099	93636.7	112003	69865.6	83971.9
p365	382.196	13.9918	C16H26N6O5	Ala-Val-Gly-His	6	Peptide(tetra-)	Basic peptide	588929	0.733022	1	1.41902	0.966255	1.15655	1.33671	0.972527	0.545143	0.970133	0.794674	0.58555	0.67698	0.797699	0.876097	185184	195411	445708	314888	224873	325919	296319	423820	439371	378175	571473	478258	479183	526647	588929	342574	274304	330373	408355	445112	363688	478654	381475	425900	505630	457471	489216
p3726	546.255	12.7164	C24H34N8O7	Ala-Trp-Asp-Arg	8	Peptide(tetra-)	Basic peptide	229741	0.619806	1	0.870288	0.632274	1.07609	1.00741	0.519296	0.589994	0.798758	0.753523	0.684735	0.673867	0.772711	0.710716	85652.7	113109	139371	105888	108238	163759	177783	173254	186507	189715	181221	128480	143025	164045	158672	115907	96169.8	61409.9	147172	142709	153545	166120	198124	229741	211289	189227	136490
p3771	345.176	16.778	C12H23N7O5	Arg-Gly-Gly-Gly	8	Peptide(tetra-)	Basic peptide	250080	1.51126	1	0.467261	1.12855	0.680517	0.456137	1.11375	1.44053	0.313045	0	1.42865	0.187043	0.0405919	0.773506	187376	115008	250080	107557	105537	152904	89589.5	101141	43129.8	119805	21229.7	63045	50442.7	53623.6	48359.3	143814	162525	57379.2	98643.1	109328	132752	33480.1	70920.7	48569	59008	40296.6	41449.9
p3811	403.244	13.5803	C17H33N5O6	Ala-Lys-Val-Ser	8	Peptide(tetra-)	Basic peptide	159634	0.0903175	1	1.81404	0.372773	0.830481	1.71521	0.600353	0.602569	0.933343	0	0.37774	0.191531	0	0.706549	0	0	0	0	30956.2	56283.3	88852.8	25178.2	74802.6	97631.4	134746	99730.9	121351	124063	141870	54178.7	0	20970.5	33967.9	18650.1	94733.7	16133.9	57560.5	47729.1	68488.8	159634	131333
p3816	449.249	14.3374	C18H35N5O8	Lys-Thr-Thr-Thr	8	Peptide(tetra-)	Basic peptide	164548	0.919555	1	1.12632	0.771967	1.04784	0.930813	0.7839	0.754525	0.871248	0.769848	0.795616	0.854293	0.812385	0.868971	125016	90733.6	128250	97594.6	121650	104395	86265.9	142076	119713	160068	121861	159945	141509	138127	128449	87747.3	74324.5	100161	100334	110278	164548	129157	111370	109534	127211	136261	130037
p3831	479.274	8.61205	C23H37N5O6	Ala-Lys-Val-Tyr	8	Peptide(tetra-)	Basic peptide	151416	0.705098	1	0.39395	0	0.926663	0.458471	0	0.702389	0.42546	0.0603168	0.770943	0.154036	0.0861143	0.292691	73755.2	81379.1	98875.7	87969.9	87268.2	151416	138458	119904	79109.3	119890	48783.2	30179.7	41849	55299.2	63716.8	0	0	0	0	0	114597	127916	131955	78582.4	111082	64712.1	47640.5
p3854	484.228	12.2574	C20H32N6O8	Asp-Leu-Thr-His	8	Peptide(tetra-)	Basic peptide	235449	1.7092	1	0	0	0.739905	0	0	2.54384	0	0	2.10183	0	0	0.351137	123411	128566	148202	82712.7	132512	78495.3	69717.8	69919.4	42077.5	99843.5	0	0	0	0	0	0	0	0	0	0	76365.2	26978.8	56464.9	47398.5	59198	0	0
p3895	503.234	15.9376	C19H33N7O9	Ala-Glu-Arg-Glu	8	Peptide(tetra-)	Basic peptide	112158	0.53069	1	0.468453	0.0913533	1.20269	0.798228	0.0760111	0.364181	1.2732	0.340663	0.539964	0.857934	0.544425	0.833794	0	25137.5	62406.1	48075.6	40483.2	69432.3	72662.5	69247.3	62744.7	57750.1	25730	32111.1	28939.9	43359.7	25309.5	0	0	0	0	30314.4	68628.8	88098.3	69984.9	91845.6	80538.9	61988.8	28268.6
p3902	498.218	18.7147	C19H30N8O8	Asn-Thr-Gln-His	8	Peptide(tetra-)	Basic peptide	105025	0.728014	1	1.26461	1.02366	1.10427	1.15935	0.947765	0.475872	0.865454	1.02025	0.678403	0.649207	0.780223	0.888124	21470.4	18921.8	92627.5	43916.4	42957.1	46075.2	63198.7	72521.1	63114.6	57135.7	64035	81286.1	61437.8	84606.5	90605.3	51528.1	42719.7	56240.8	84802.1	73900.7	65938.1	74631.7	54204.4	76302	62463.1	53907.5	58667.9
p442	403.182	16.1449	C14H25N7O7	Arg-Asp-Gly-Gly	6	Peptide(tetra-)	Basic peptide	625630	0	0	133.317	402.718	0	117.252	398.72	0	88.4581	0	0	23.9409	38.5788	195.478	0	0	0	0	0	0	0	0	0	0	71996.5	188065	163134	145372	98019.9	471731	613503	268328	318640	341389	0	0	0	0	0	94159	130533
n1169	474.123	10.2341	C18H26N4O7S2	Cys-Cys-Ser-Tyr	6	Peptide(tetra-)	Hydrophobic peptide	102671	0.954803	1	2.35484	3.24899	1.06783	2.14182	3.31342	0.158225	0.792854	0	0.618982	0.182244	0	1.48031	20454.3	20428.1	33298.7	33799.1	25369.2	28896.4	33819.7	31826.7	26664.5	18454.1	55486.6	74092.5	69771.9	78182.5	51347.6	102671	97930.8	93416.6	75056.1	84684.7	24068.2	35425.8	33659.8	35509.7	20471.3	61342.6	62311.8
n1922	416.206	8.04905	C21H28N4O5	Phe-Gly-Pro-Pro	6	Peptide(tetra-)	Hydrophobic peptide	183569	0.549328	1	0.500144	0.288358	1.06799	0.498043	0.28197	0.687834	0.46189	0.262361	0.577593	0.372875	0.275745	0.611806	34627.3	44207.7	40109.1	39699.9	34788.4	59213.9	89684.1	76666.4	63954.4	62607.2	29828.2	34919.5	32603.8	35601.5	43160.5	22247.4	15549.1	22407.2	21927.1	19407.6	68036.5	89118.9	75192.4	71928.5	71791.8	35406.7	32278.1
n200	565.185	17.0604	C24H31N5O9S	Asp-Met-Trp-Asp	6	Peptide(tetra-)	Hydrophobic peptide	542015	0	0	262.304	477.091	0	207.648	490.646	0	118.85	6.49285	0	60.6692	143.951	209.229	0	0	0	0	0	0	0	0	0	0	211567	224294	223549	360381	291729	493317	497671	467262	497869	429338	0	0	0	0	0	207930	180430
n2526	504.168	18.0438	C23H28N4O7S	Cys-Gly-Tyr-Tyr	6	Peptide(tetra-)	Hydrophobic peptide	399642	0.645416	1	1.20607	0.641338	1.06703	1.21559	0.606355	0.482096	0.748576	0.476344	0.512258	0.537458	0.460808	0.7407	157229	145948	203227	178744	160430	289238	253717	243006	318810	205357	399642	294793	267041	305749	312878	194303	106068	140464	199799	199601	255663	353064	247970	283274	257973	335682	298832
p1271	559.211	15.0066	C26H33N5O7S	Cys-Phe-Gln-Tyr	6	Peptide(tetra-)	Hydrophobic peptide	170335	0	0	0	145.963	0	0	134.838	0	0	0	0	0	0	41.367	0	0	0	0	0	0	0	0	0	0	0	0	0	0	0	140618	170335	157501	126570	134790	0	0	0	0	0	0	0
p1323	490.279	5.01073	C25H38N4O6	Ile-Val-Pro-Tyr	6	Peptide(tetra-)	Hydrophobic peptide	1469121	1.48412	1	0.864283	0.944336	1.38869	0.917166	0.927483	1.33406	1.02429	1.41073	1.48076	1.19588	1.32693	0.984205	632726	650784	1.239e+06	676719	727878	521381	596663	594413	441581	492057	531434	431991	502511	436445	384594	382872	367699	839613	443866	464752	477286	1.46912e+06	540448	552967	634772	363946	605467
p1332	440.3	5.0425	C22H40N4O5	Ile-Ile-Pro-Val	6	Peptide(tetra-)	Hydrophobic peptide	490363	0.992478	1	0.719528	1.03409	1.22471	0.762461	1.04555	1.01381	0.772758	1.54409	1.08056	0.777233	1.08508	0.781033	203101	190204	364965	159640	197929	230991	269176	234024	172541	217563	140111	156526	169885	180031	162409	223383	129115	252920	237549	319653	216756	490363	216491	233744	219583	161400	168059
p1394	342.19	9.12147	C15H26N4O5	Ala-Val-Gly-Pro	6	Peptide(tetra-)	Hydrophobic peptide	521821	0.583334	1	0.685827	0.483823	1.15554	0.621546	0.492296	1.02724	0.491783	0.530884	1.1417	0.483521	0.429963	0.544334	205372	232849	256657	176197	191357	383612	410423	338348	393131	295798	233878	252085	215993	263025	284123	184876	132062	142326	191670	230258	490171	493978	422178	357596	340675	264757	203274
p1412	346.185	9.28365	C14H26N4O6	Ala-Leu-Gly-Ser	6	Peptide(tetra-)	Hydrophobic peptide	214853	1.29805	1	0.869976	1.05375	1.35716	0.849895	0.920629	1.20769	0.94768	1.34992	1.24836	0.929913	0.953903	1.04327	91918.5	96049.3	160603	72340.8	91333.1	62875.3	85314.3	75276.5	79953.7	91205.9	76144.7	60298	72030.6	77182.6	57659.1	70258.1	69210.4	96688.3	78170	101511	75381	214853	87394.5	70068.6	87871.8	59662.2	82021
p1416	430.206	9.1556	C18H30N4O8	Asp-Leu-Pro-Ser	6	Peptide(tetra-)	Hydrophobic peptide	181866	0.997874	1	0.840048	0.647874	1.0414	0.827808	0.644813	0.968273	0.984782	1.10084	0.958537	0.885937	0.849944	0.738723	104446	114955	181866	136538	116770	159023	112015	124449	119541	140943	110923	94815	123848	104576	116884	81299.2	70044.7	98944.4	81677.5	93019.6	161480	112184	147622	125500	136339	132300	99689.4
p2185	443.238	8.62354	C19H33N5O7	Asn-Leu-Thr-Pro	6	Peptide(tetra-)	Hydrophobic peptide	293819	1.00706	1	0.783274	0.669551	1.39298	0.772546	0.724138	0.832401	0.811963	1.24054	0.921674	0.78559	0.906018	0.756979	74206	85943.8	183877	93813.4	80224.7	101002	122997	98496.8	104915	87024.6	89875.7	68174.1	79917.6	84678.6	80298	68877.2	45650.4	92371.6	66942.6	70598.8	94448.4	293819	103973	95776.5	128583	73356.7	70038.1
p2396	440.227	11.4734	C20H32N4O7	Asp-Leu-Pro-Pro	6	Peptide(tetra-)	Hydrophobic peptide	2024604	0.642869	1	0.681163	0.421046	1.12205	0.706111	0.429544	0.627758	0.559479	0.74711	0.632793	0.454417	0.456524	0.585463	746344	1.06856e+06	1.34614e+06	1.16142e+06	908772	1.74898e+06	1.84987e+06	1.54439e+06	1.64724e+06	1.34685e+06	914511	1.03464e+06	988282	1.25845e+06	1.34697e+06	754655	540907	465950	783958	880720	1.81967e+06	1.93304e+06	1.97184e+06	1.65995e+06	1.746e+06	1.15081e+06	1.09825e+06
p2457	472.269	7.55745	C25H36N4O5	Leu-Phe-Pro-Pro	6	Peptide(tetra-)	Hydrophobic peptide	2283263	0.15822	1	0.556292	0.116307	0.995488	0.515961	0.183309	0.402126	0.206069	0.264182	0.192481	0.219128	0.201389	0.310116	0	290657	366874	288216	23586.1	757615	2.28326e+06	1.215e+06	917021	953596	513624	498125	1.03008e+06	710856	655441	307626	15575	20454.8	159917	208984	1.13126e+06	1.18836e+06	1.33955e+06	1.43054e+06	1.00915e+06	947709	552205
p2716	503.238	9.35203	C24H33N5O7	Ala-Leu-Trp-Asp	6	Peptide(tetra-)	Hydrophobic peptide	451079	0.29597	1	1.15022	0.857779	1.10559	1.1681	0.940956	0.348559	0.547646	1.20626	0.372317	0.459436	0.793692	0.694589	55814.9	80816.3	154921	78793	66734	277889	408797	260658	344666	184762	341553	348006	329934	344929	334186	319498	150953	147088	364878	284326	288573	390361	302277	311154	340338	410084	291046
p2814	439.243	9.02486	C20H33N5O6	Asn-Leu-Pro-Pro	8	Peptide(tetra-)	Hydrophobic peptide	1622300	0.400195	1	0.777289	0.389909	1.08133	0.831494	0.407136	0.485762	0.590223	1.03317	0.528833	0.446939	0.566151	0.561926	348560	448749	584435	571817	355821	1.20894e+06	1.44921e+06	1.07848e+06	1.18422e+06	849790	940658	880687	806265	859235	998614	501043	357200	355021	533297	503466	1.21514e+06	1.33309e+06	1.31333e+06	1.23564e+06	1.14276e+06	928865	945006
p2879	487.243	7.60976	C24H33N5O6	Gln-Phe-Pro-Pro	8	Peptide(tetra-)	Hydrophobic peptide	1637798	0.251674	1	0.625534	0.491801	0.995939	0.573044	0.454037	0.517838	0.358266	0.346636	0.354029	0.238472	0.264776	0.521431	142451	253212	332256	305264	202704	844081	1.6378e+06	803520	829868	795407	516321	599791	494290	732472	728922	643566	195284	301799	623537	650890	700698	1.15957e+06	1.09549e+06	946160	988818	668882	507638
p2923	436.126	15.5865	C15H24N4O9S	Asp-Met-Asp-Gly	6	Peptide(tetra-)	Hydrophobic peptide	157896	0	0	20.7416	134.558	0	17.9573	125.093	0	0	0	0	0	11.7859	40.554	0	0	0	0	0	0	0	0	0	0	22664.2	0	0	52510.8	28533.1	140176	145305	140942	126966	119399	0	0	0	0	0	28089.1	0
p2949	454.207	10.7445	C20H30N4O8	Ala-Thr-Thr-Tyr	8	Peptide(tetra-)	Hydrophobic peptide	1033577	0.756375	1	0.978451	0.686177	1.27624	1.06614	0.630342	0.603202	0.720465	0.990516	0.614673	0.605393	0.594077	0.754883	207734	249788	602088	288119	260664	377291	470160	341124	555610	382264	360638	405629	317288	501648	495422	326466	178601	305072	313380	335601	426504	1.03358e+06	346784	462472	444525	491801	395403
p314	388.196	10.817	C16H28N4O7	Ala-Glu-Gly-Ile	6	Peptide(tetra-)	Hydrophobic peptide	1220286	0.634703	1	1.36184	1.48557	1.23766	1.37749	1.36034	0.447366	0.756746	0.774623	0.625236	0.518673	0.597793	0.809084	252233	320672	542723	403954	418212	617928	533808	532941	807309	561088	969169	804110	659921	876288	848303	1.0212e+06	698177	1.06168e+06	856775	897732	672544	1.22029e+06	529075	631441	725333	920841	663106
p322	400.232	10.7821	C18H32N4O6	Ala-Leu-Thr-Pro	6	Peptide(tetra-)	Hydrophobic peptide	490730	0.925041	1	0.863535	1.05877	1.36087	0.883419	0.949169	0.605345	0.698712	1.11134	0.755822	0.590489	0.610738	0.764297	150765	138120	296204	181155	158692	186929	230211	204277	241217	137252	157050	158005	166216	198138	184028	249169	125905	195482	219502	268587	211196	490730	163799	259584	235404	182739	175143
p3271	531.27	9.7513	C26H37N5O7	Asp-Leu-Trp-Val	6	Peptide(tetra-)	Hydrophobic peptide	327061	0.477105	1	1.0735	0.503477	1.06017	1.09665	0.496879	0.422829	0.615358	0.875278	0.450753	0.480096	0.712824	0.624069	85710.3	98689.8	141174	117422	108666	254472	261832	202354	242850	194760	283383	218174	208303	285715	245677	120702	105200	107823	129695	118735	230300	302275	226116	279113	188041	294715	177230
p3380	356.206	9.44907	C16H28N4O5	Ala-Leu-Gly-Pro	8	Peptide(tetra-)	Hydrophobic peptide	461678	0.462106	1	0.52931	0.218011	1.14827	0.596939	0.2458	0.625679	0.463582	0.859045	0.604834	0.410811	0.523341	0.480388	106921	141397	200952	177809	132088	321525	461678	295811	287668	276160	168749	176636	151137	190164	182886	73997	52148.1	60536	88412.6	83064.1	392009	425656	370036	350972	347756	223098	188806
p3528	406.185	9.13006	C19H26N4O6	Ala-Gly-Pro-Tyr	8	Peptide(tetra-)	Hydrophobic peptide	401614	0.344173	1	0.724491	0.323345	0.976041	0.665366	0.335415	0.449865	0.549221	0.382795	0.404205	0.363852	0.411492	0.468442	69386.3	109439	125626	120911	76262.7	258760	401614	269525	307024	220556	231290	183885	185622	225931	229203	93561.3	71780.3	100077	94050.3	111800	269349	319131	304511	252662	276905	213785	146294
p3609	356.206	13.0775	C16H28N4O5	Ala-Val-Ala-Pro	6	Peptide(tetra-)	Hydrophobic peptide	107894	0.650066	1	1.16999	1.06557	1.20154	1.17445	0.992248	0.720571	0.86426	0.878781	0.629923	0.773558	0.649829	0.943661	37610.5	67087.1	36121.6	65037.8	36574.3	80248.3	59428.6	63320.7	90980.6	78955.1	84152.2	77394.9	91560.5	93100.3	90119	94730.2	71050.4	83866.4	78585	69155.6	84864.4	107673	69420.6	84492	101644	82024.7	76122
p3672	488.227	9.87635	C24H32N4O7	Glu-Phe-Pro-Pro	8	Peptide(tetra-)	Hydrophobic peptide	246087	0.208338	1	0.830841	0.772456	1.11884	0.960399	0.80254	0.332099	0.523502	1.38516	0.495471	0.39623	0.699982	0.637921	0	35589.9	57636.9	37065.5	0	126463	186197	110317	120039	82371.8	80382.3	113145	127017	99502.6	99551.7	116355	56253.1	81469.3	105942	123064	98744.4	212628	138108	137796	112430	147079	115252
p3700	471.233	12.9131	C20H33N5O8	Asn-Glu-Ile-Pro	8	Peptide(tetra-)	Hydrophobic peptide	293694	0.542424	1	0.614484	0.324729	0.934151	0.683461	0.336342	0.509046	0.54033	0.381101	0.603181	0.361609	0.259111	0.477101	75944.9	147760	153071	198229	111823	281739	293694	248299	243683	198807	183853	138882	118169	140288	196881	90534.3	42306.7	81951.4	98571.1	97815.7	257149	202606	270897	204024	248166	192064	188966
p3768	446.201	10.4963	C18H30N4O9	Ala-Glu-Asp-Ile	8	Peptide(tetra-)	Hydrophobic peptide	206931	0.481523	1	0.966771	0.630345	1.01131	1.00816	0.539451	0.386002	0.729872	0.130369	0.479163	0.503134	0.306041	0.630605	77076	76303.1	64460.9	105426	72569.7	172098	163223	114011	206931	165786	174000	133196	134914	172950	179672	105410	58700.9	58863.4	146817	148383	163027	148075	187669	176722	155853	181296	143430
p3800	462.197	15.2562	C19H34N4O5S2	Cys-Leu-Met-Pro	6	Peptide(tetra-)	Hydrophobic peptide	196750	2.63244	1	0	0	0.636601	0	0	3.10937	0	0	2.53868	0	0	0	172832	114566	185500	73934.1	85944.6	36521.2	55955.5	62843.2	0	85057.4	0	0	0	0	0	0	0	0	0	0	70664.9	15778.9	30664.2	0	35916.6	0	0
p3809	403.207	15.9858	C16H29N5O7	Ala-Leu-Asn-Ser	8	Peptide(tetra-)	Hydrophobic peptide	182944	0.534278	1	0.971103	0.72448	1.14392	0.991193	0.687675	0.672804	1.22756	0.474014	0.754265	0.990022	0.666539	0.792122	53439.3	59608.5	73237.9	56153.7	52613.3	85695.4	135989	138986	79723.9	111851	96822	107019	126654	92839.7	112952	64605.6	41711.2	46643.3	111120	136010	87777	140519	129635	130438	143354	112620	91559.5
p526	472.269	5.13914	C25H36N4O5	Ile-Phe-Pro-Pro	6	Peptide(tetra-)	Hydrophobic peptide	3214098	0.277712	1	0.494961	0.214236	0.69607	0.466113	0.18993	0.427989	0.297165	0.469118	0.337742	0.275278	0.305749	0.314467	482780	614516	687856	712458	461936	1.98588e+06	3.2141e+06	1.97024e+06	2.12312e+06	1.36355e+06	1.19181e+06	1.28366e+06	943050	663043	1.19318e+06	503661	303270	326254	472572	677331	687151	715117	2.53323e+06	1.91129e+06	1.57115e+06	1.54395e+06	676357
p643	574.275	8.172	C27H38N6O8	Glu-Ile-Gln-Trp	6	Peptide(tetra-)	Hydrophobic peptide	330601	0.456943	1	0.78795	0.759501	1.28714	0.737578	0.676911	0.538839	0.467182	0.578455	0.455937	0.434684	0.49342	0.63461	46900.6	27059.8	98237.4	63897	68376.8	120969	190494	104454	157771	92636.5	99531	114319	95816.4	99039.2	116324	120493	47904.5	97494.3	108893	131288	116992	330601	128059	133212	148790	130209	76093.8
p1886	328.175	9.96573	C14H24N4O5	Ala-Ala-Ala-Pro	6	Peptide(tetra-)	Nonpolar peptide	411452	0.601602	1	0.689813	0.39196	1.09719	0.707216	0.382946	0.628441	0.507705	0.618747	0.647926	0.393279	0.34541	0.529214	165820	182597	174313	200209	207367	314672	367998	279131	324832	259747	222058	185986	214637	192651	251382	135360	78436.9	103747	140546	148029	367973	411452	322806	287218	307217	254045	224601
p3135	354.19	14.193	C16H26N4O5	Ala-Ala-Pro-Pro	6	Peptide(tetra-)	Nonpolar peptide	291205	0.638816	1	2.42812	1.7977	1.14303	2.46042	1.81125	0.404748	0.95854	0.66837	0.649708	0.574591	1.12464	1.45532	39036.1	29814.7	89147.9	86516.7	53457.1	88135.3	78372.2	85007.5	129765	85165.1	229175	213543	214227	230965	244674	160844	125915	177162	185323	189283	81120	147244	84647.3	116641	103509	240545	193441
p3453	366.103	15.6113	C12H22N4O5S2	Ala-Ala-Cys-Cys	8	Peptide(tetra-)	Nonpolar peptide	710417	0.824125	1	1.33897	0.916442	1.1414	1.57894	0.734319	0.783374	3.02788	1.09253	0.841642	2.99234	2.11027	1.71391	134566	124421	177155	162410	133313	144422	150629	173408	167056	252535	259045	246078	284607	182980	216357	122148	209978	141825	161154	178741	156311	207763	228622	180824	240101	243479	285059
n2930	320.133	13.596	C11H20N4O7	Ala-Gly-Ser-Ser	6	Peptide(tetra-)	Polar peptide	157598	0.915263	1	1.21251	1.53899	1.52051	1.19278	1.45948	0.694118	0.81423	1.15901	0.906657	0.675615	1.11441	1.09265	42360.5	36093.7	82547.1	41479.6	43146.2	46558.8	53876.9	53024.4	67345.2	47562.5	61780	68556.8	58808.4	67215.4	69038.8	80386.2	47400.3	67603.6	107792	109834	48546.9	157598	49864.2	68849.5	83196.9	60329.2	62711.5
p1044	388.17	13.736	C14H24N6O7	Ala-Ala-Asn-Asn	6	Peptide(tetra-)	Polar peptide	255147	0	0	67.4816	155.449	0	57.0168	176.003	0	38.559	0	0	9.14562	0	54.6058	0	0	0	0	0	0	0	0	0	0	28664.9	93949.7	64370.3	92296.7	58126.4	205239	224524	74187.9	107103	166190	0	0	0	0	0	54947.9	57565.9
p1344	397.196	11.3147	C17H27N5O6	Ala-Asn-Pro-Pro	6	Peptide(tetra-)	Polar peptide	969921	1.25884	1	0.869867	1.40009	1.60604	1.02495	1.35975	0.991489	0.814099	1.64353	1.0957	0.894965	1.11294	1.10543	294727	284269	727501	241402	285528	195504	400891	266154	304874	289021	218800	261582	228619	260931	296981	464796	204517	434079	416725	519039	284376	969921	314598	310117	460096	263172	286550
p1688	374.155	13.9327	C13H22N6O7	Ala-Asn-Asn-Gly	6	Peptide(tetra-)	Polar peptide	179363	0	0	113.059	141.306	0	85.0806	140.017	0	71.292	0	0	31.6871	3.88875	58.1514	0	0	0	0	0	0	0	0	0	0	64765.7	111798	111676	149930	127126	164096	149212	85112.4	143414	164695	0	0	0	0	0	90090.1	72620.1
p2290	360.164	13.4381	C14H24N4O7	Ala-Pro-Ser-Ser	6	Peptide(tetra-)	Polar peptide	397283	0.70388	1	0.834769	0.742588	1.16697	0.876385	0.7186	0.706863	0.645308	0.682884	0.811815	0.515227	0.457116	0.732463	134016	161549	236793	180803	129379	227811	277326	213572	286901	191382	151183	211545	165726	212238	258521	227409	99819.1	151480	186952	223212	233179	397283	278247	271322	216822	220032	200813
p2436	318.154	17.2982	C12H22N4O6	Ala-Ala-Ala-Ser	6	Peptide(tetra-)	Polar peptide	192181	0.757001	1	2.53423	1.67835	1.12906	2.4634	1.76741	0.503536	1.86481	0.997392	0.720057	1.19527	1.44011	1.72744	24768.7	53086.2	58900.5	53537.5	46097.1	66816.7	56893.2	61956.7	70832.2	55773.1	164167	176906	138104	144817	167375	113365	84596.1	86989.3	105461	133690	82758.5	87732	61300.7	63082.6	57699.8	131916	141566
p2581	340.175	12.6022	C15H24N4O5	Ala-Gly-Pro-Pro	8	Peptide(tetra-)	Polar peptide	3032042	0.4477	1	0.65455	0.24798	1.0422	0.694008	0.26292	0.477109	0.523615	0.347827	0.552131	0.374208	0.287031	0.454733	829707	1.07674e+06	1.07213e+06	1.49902e+06	990071	2.53839e+06	2.37078e+06	2.39328e+06	2.65487e+06	2.25546e+06	1.95183e+06	1.31463e+06	1.41908e+06	1.51869e+06	1.78965e+06	654692	445860	464948	747239	715787	2.76744e+06	2.14532e+06	3.03204e+06	2.14949e+06	2.63393e+06	2.00329e+06	1.54556e+06
p3150	427.207	13.1235	C18H29N5O7	Asn-Thr-Pro-Pro	8	Peptide(tetra-)	Polar peptide	688030	0.302868	1	0.742947	0.364875	1.01539	0.675579	0.373082	0.418387	0.437154	0.396756	0.394247	0.367631	0.413166	0.470735	145321	211002	134281	245604	173306	688030	678137	656236	564806	415792	600233	392216	362507	419574	456540	254241	214684	152160	254693	219943	632536	674832	625358	543890	572590	411180	331013
p3175	402.186	13.2607	C15H26N6O7	Ala-Ala-Asn-Gln	8	Peptide(tetra-)	Polar peptide	723755	0.14351	1	2.3195	1.69993	0.484681	1.5791	1.82319	0.451161	0.569388	0.11382	0.26289	0.366308	0.250707	0.814307	0	35429.2	74434.3	61057	0	180361	233954	172165	408545	195979	298102	540979	480459	719236	723755	547886	537577	194987	338972	405203	121862	97872.3	85348.4	168376	103798	350016	305203
p3442	330.154	12.9036	C13H22N4O6	Ala-Gly-Pro-Ser	8	Peptide(tetra-)	Polar peptide	605993	0.782846	1	0.688147	0.279957	1.15224	0.807304	0.319399	0.552699	0.581897	0.736487	0.798908	0.446432	0.346599	0.531461	212277	303478	239321	427622	304326	486183	301121	353149	354767	404290	323732	221177	244259	252888	265088	92976.3	99153.7	103840	138383	97427.5	605993	333531	506635	336582	405953	392442	294526
n2913	359.133	12.8278	C14H21N3O8	Glu-Asp-Pro	8	Peptide(tri-)	Acidic peptide	221118	0.42033	1	0.999167	0.514499	1.33069	1.09534	0.509458	0.553361	0.630925	0.386484	0.551385	0.461845	0.360767	0.62266	45819.2	52208	55707.9	66262.3	56082.8	121711	130702	105561	168296	130548	156254	118465	105739	130634	145179	77670.8	44699.7	58904.8	76543.4	80113.3	161021	221118	176025	142692	173162	174491	117125
n3119	319.138	17.107	C12H21N3O7	Glu-Ala-Thr	8	Peptide(tri-)	Acidic peptide	136791	0.725337	1	4.21802	29.1272	0	0	31.2837	5.33091	30.4657	11.059	10.0733	12.3044	67.756	26.3214	0	0	0	4064.09	0	0	0	0	5603.05	0	0	0	10257.5	13376.3	0	45512.5	35603.8	29601.1	35184	17299.9	0	0	0	0	0	0	0
p1813	319.138	13.3337	C12H21N3O7	Glu-Ala-Thr	6	Peptide(tri-)	Acidic peptide	185103	0.870403	1	1.15087	1.2293	1.24559	1.10253	1.07089	0.604616	0.868753	1.06242	0.801598	0.690817	0.871469	0.999153	48172.5	90694.2	132534	78107.1	63676.9	94369.2	82161.8	67108.8	144242	86823.5	129261	118098	92058.5	107200	99705	148774	75358.5	120490	112137	126795	85184.7	177847	86177.8	126584	115497	116420	107906
p2062	361.124	16.3587	C12H19N5O8	Asn-Asn-Asp	6	Peptide(tri-)	Acidic peptide	278255	0	0	0	155.723	0	0	175.086	0	0	0	0	0	0	62.4282	0	0	0	0	0	0	0	0	0	0	0	0	0	0	0	220939	137851	124475	170796	124556	0	0	0	0	0	0	0
p3007	305.123	14.6465	C11H19N3O7	Glu-Ala-Ser	8	Peptide(tri-)	Acidic peptide	996095	0.954244	1	4.85112	21.6638	0.758719	3.88871	20.7175	1.21787	1.12878	0	1.22544	0.558731	1.90633	6.15637	23992.1	28891.7	25100.6	63331.4	31089.3	46037.8	28116	14504.4	57567.6	34446	154529	179475	142172	225351	174933	870731	928711	895663	667177	551755	30092.5	21178.2	18047.3	32926.7	34834.5	136197	122866
p3052	331.138	15.0473	C13H21N3O7	Glu-Pro-Ser	8	Peptide(tri-)	Acidic peptide	1139363	0.543063	1	0.711372	0.241548	1.08017	0.779115	0.225282	0.517921	0.57774	0.569764	0.581905	0.441516	0.315849	0.620189	323793	412836	526057	572497	363694	828461	877940	830978	838034	673611	508035	557427	541932	625117	647853	212447	178648	159477	203078	224384	875897	805177	1.13936e+06	825376	727816	641427	602010
p3082	291.107	15.4764	C10H17N3O7	Ala-Asp-Ser	6	Peptide(tri-)	Acidic peptide	577213	0	0	152.606	414.104	3.70727	141.219	387.495	0	13.2232	0	0	0	153.109	145.117	0	0	0	0	0	0	0	0	0	0	118243	153550	147104	188849	155283	368029	577213	479473	328636	317172	0	18536.4	0	0	0	146097	150767
p3635	341.158	13.7515	C15H23N3O6	Glu-Pro-Pro	8	Peptide(tri-)	Acidic peptide	265696	0.755232	1	0.760151	0.396797	1.11443	0.803879	0.388277	0.629917	0.716571	0.431935	0.664361	0.521401	0.41771	0.604467	108268	138936	157700	159531	196111	231666	165329	190955	222109	196979	183053	145341	119398	159508	158201	87646.1	70034.5	60323.5	79430.8	102155	230827	231995	199955	193797	265696	179119	147244
p3757	261.096	15.4469	C9H15N3O6	Ala-Asp-Gly	8	Peptide(tri-)	Acidic peptide	177610	0.733908	1	0.820464	1.26617	1.06372	0.773492	1.0787	0.66884	0.593611	0.821714	0.868472	0.484113	0.539785	0.753336	99101.2	64886.4	117475	73246.8	80212.5	157034	107298	113272	120946	94063.4	98897	95011.2	102072	104808	85428.4	134546	172375	150763	142353	150312	157457	146306	95956.9	98458.5	132194	97375.1	107483
p3801	345.153	14.5593	C14H23N3O7	Glu-Pro-Thr	8	Peptide(tri-)	Acidic peptide	210810	0.703181	1	0.684882	0.391559	1.02711	0.700745	0.319824	0.610913	0.562434	0.501285	0.594616	0.490683	0.318401	0.6403	91178	102995	163885	139121	122545	189416	165620	201800	166336	158143	149167	105515	113068	116999	118847	84849.6	75954.2	38931.6	80052.3	65299.6	200307	145526	210810	159756	188810	131327	122060
p3894	315.143	14.2954	C13H21N3O6	Glu-Ala-Pro	8	Peptide(tri-)	Acidic peptide	156007	1.02513	1	0.704876	0.375306	0.922463	0.695857	0.305911	1.00812	0.546606	0.563947	0.840624	0.438991	0.333512	0.62024	88350.7	84700.4	156007	91179.5	124069	113962	102221	94322.7	110198	110262	60232.1	81533.3	69786.9	72460.8	90251.5	43951.9	32441	26571.3	46373.8	49936.6	134844	88649	102715	86281.3	77307.1	74418.8	78233.5
n3111	370.233	10.7585	C16H30N6O4	Val-Pro-Arg	8	Peptide(tri-)	Basic peptide	130040	0.975544	1	0.92793	1.38085	1.44986	0.969863	1.39056	0.791434	0.694989	1.10029	0.878894	0.689523	0.809082	0.905967	50065.8	40045.2	63004.3	44796.7	41086	47657.1	59740.7	49525.7	54999.5	33066.4	39283.3	44704.1	47559.1	48020.1	47766.5	75334.9	36306.9	71721.1	69718.1	85211.4	51632.5	130040	57080.3	59183	57263.3	51668.7	52430.5
p1809	396.248	13.4031	C18H32N6O4	Ile-His-Lys	6	Peptide(tri-)	Basic peptide	344748	1.46637	1	1.2569	2.41589	1.67719	1.05653	2.24269	0.508419	0.543745	1.13336	1.02163	0.487818	1.29673	1.31947	100460	63805.1	235177	60879.7	56858	77758.9	96077.5	59793.5	60475.7	58587.6	76653.7	100665	101775	97412.6	66793.6	174377	89134.2	176583	197091	214882	69994.2	344748	52544.6	74009.8	50236.2	63654.6	86229
p2462	406.163	16.9176	C14H26N6O6S	Glu-Arg-Cys	6	Peptide(tri-)	Basic peptide	129809	0	0	0	88.2833	0	0	99.6468	0	0	0	0	0	0	0	0	0	0	0	0	0	0	0	0	0	0	0	0	0	0	122440	85374.3	62661.1	106597	64343.7	0	0	0	0	0	0	0
p2827	356.243	10.7679	C17H32N4O4	Ile-Lys-Pro	6	Peptide(tri-)	Basic peptide	1207597	0.954405	1	0.778074	1.05281	1.31507	0.818938	0.943912	0.715989	0.659184	1.16156	0.78307	0.610436	0.686258	0.793625	371892	379295	767655	470839	419266	484588	577002	492082	583324	387035	329926	392987	444951	415920	380098	680935	301692	521033	539132	614524	441070	1.2076e+06	500490	617493	552635	417621	373328
p2913	314.195	15.872	C14H26N4O4	Lys-Ala-Pro	8	Peptide(tri-)	Basic peptide	1352151	0.552941	1	1.38613	0.785251	1.04673	1.32502	0.811282	0.746869	1.4147	0.474045	0.695166	1.08934	0.77156	1.06987	388970	495020	628960	389483	393062	690502	953947	952304	713962	840716	1.05961e+06	1.16937e+06	1.13273e+06	1.11341e+06	1.27928e+06	652998	425034	392432	845902	943550	790193	772978	973621	927020	881617	1.25866e+06	972383
p2952	353.206	10.6709	C16H27N5O4	Val-Val-His	6	Peptide(tri-)	Basic peptide	132270	0.762651	1	0.965894	0.862483	1.17361	0.988116	0.819143	0.714938	0.888556	1.02612	0.659803	0.659626	1.00422	0.797402	28082.5	59993.5	110639	53361.1	65948.7	80753	87225.5	83359.9	91485.8	74175.8	77706.6	80950	72660.5	88886.5	82574.1	76176.3	49766.2	63989.6	86962.6	82760.9	82935.4	115280	82034.7	76875	132270	84174.9	66878.2
p2956	358.258	10.8652	C17H34N4O4	Ile-Lys-Val	8	Peptide(tri-)	Basic peptide	1022094	1.43034	1	0.912312	1.30271	1.65922	0.92913	1.12868	1.00519	0.868943	1.31248	1.1712	0.848339	1.0573	1.08659	272681	227760	749892	234153	284293	197988	273276	215966	271198	278186	235310	210751	239726	252825	189566	333220	197921	410856	328124	340830	281522	1.02209e+06	202951	260571	284676	209510	239637
p3045	390.227	11.4902	C20H30N4O4	Lys-Phe-Pro	6	Peptide(tri-)	Basic peptide	578997	0.515743	1	0.991711	0.510988	1.1978	0.955764	0.436056	0.432347	0.614198	0.476744	0.514022	0.43413	0.453589	0.601316	121932	165702	221257	245828	198091	358570	340847	339785	441625	366625	459624	320740	291573	389174	371027	210929	110503	186458	227577	208557	362862	578997	346075	429388	495565	360808	284466
p3151	342.226	13.2002	C16H30N4O4	Lys-Val-Pro	6	Peptide(tri-)	Basic peptide	407491	0.342976	1	1.20193	1.13101	1.18236	1.03945	1.09043	0.426539	0.450945	0.199917	0.406095	0.339621	0.375469	0.713617	64834.5	89605.1	77640.8	125600	68750	226432	265746	244884	330342	175921	294887	280907	248712	353384	316498	330390	215132	188862	306495	365329	265866	407491	289512	231225	275965	315500	207437
p3277	340.212	16.3743	C16H28N4O4	Lys-Pro-Pro	8	Peptide(tri-)	Basic peptide	742183	0.833221	1	0.947161	0.406709	1.06139	0.956355	0.413939	0.64184	0.821209	0.676666	0.657437	0.647724	0.576587	0.67338	325059	509718	531748	589875	455954	614371	416041	594221	654434	616148	567709	507315	553526	564899	548786	247426	188732	239656	246931	254766	593810	492797	619892	624259	742183	506855	483983
p3303	314.195	14.6626	C14H26N4O4	Lys-Ala-Pro	8	Peptide(tri-)	Basic peptide	501860	0.605378	1	0.810994	0.58839	1.01112	0.714964	0.621095	0.510654	0.539086	0.29659	0.465188	0.397014	0.345378	0.591875	246859	268557	376705	256281	210553	421199	501860	456152	461048	404546	365194	341927	339825	357534	416042	289086	202233	210493	306957	312051	448051	497404	410197	459631	454489	334455	302907
p3336	302.17	16.6522	C11H22N6O4	Ala-Gly-Arg	8	Peptide(tri-)	Basic peptide	690132	1.7506	1	0.575398	0.939608	1.1577	0.640255	0.900565	1.39784	0.573699	1.03871	1.38563	0.579873	0.780844	0.899923	304381	251790	690132	222718	230518	210279	224603	217224	132260	186466	101530	108506	142588	96792	109199	194610	84799.4	157761	254918	220114	177717	457942	138621	157586	192063	101623	131068
p3351	434.228	10.9542	C20H30N6O5	Pro-Tyr-Arg	8	Peptide(tri-)	Basic peptide	919602	1.7775	1	0.0248342	0	0.580121	0	0	2.34266	0	0	1.47857	0.0223822	0	0.386464	565143	377975	391276	321192	262604	335930	190890	169962	121444	260923	0	0	26799.8	0	0	0	0	0	0	0	237035	51379.5	145098	92097	100427	0	0
p3353	373.106	18.2362	C13H19N5O6S	Asp-Cys-His	6	Peptide(tri-)	Basic peptide	588639	0	0	0	0	0	0	0	513.508	199.46	187.139	485.645	186.836	121.769	89.3643	0	0	0	0	0	0	0	0	0	0	0	0	0	0	0	0	0	0	0	0	0	0	0	0	0	0	0
p3459	332.206	14.1964	C14H28N4O5	Lys-Val-Ser	6	Peptide(tri-)	Basic peptide	306741	0.929467	1	1.61762	2.14638	1.24848	1.56463	1.99222	0.755034	0.921003	0.997796	0.851143	0.735194	1.72599	1.31942	61328.3	36394.4	155660	99254.8	69772.1	96519.3	75371.5	82057.6	114304	86212	133047	135228	158868	145622	162386	176790	192497	204798	197888	203479	86437.1	219723	75526	101331	84371.7	151528	123933
p3510	429.237	12.4716	C22H31N5O4	Lys-Trp-Pro	8	Peptide(tri-)	Basic peptide	326904	0.313301	1	0.618902	0.42742	0.905035	0.522367	0.443614	0.411679	0.248715	0	0.239798	0.134534	0.062009	0.376926	79108.4	83747	100612	76525.1	68367.1	239385	317660	258960	280979	206426	164193	150189	145807	177621	168874	137914	72479.2	88575.5	129273	128862	240847	326904	214577	174708	222596	166310	115558
p978	408.223	26.4368	C17H28N8O4	Pro-Arg-His	6	Peptide(tri-)	Basic peptide	137538	1.49884	1	0.882334	0.682454	1.02615	0.915416	0.61203	1.40795	0.947943	1.26833	1.16915	1.35976	1.22991	0.912449	111433	132549	112028	90847.9	109126	87027.7	87093.9	61148.3	53388.8	82282.7	70676.8	75600.1	63611.7	66708.3	50697.4	54710.7	55662.7	45417.7	43266	54093.5	83206.3	42687.7	90738.5	79733.5	84277.1	65514.6	65696.6
n1595	347.169	12.4837	C14H25N3O7	Glu-Ile-Ser	6	Peptide(tri-)	Hydrophobic peptide	362689	1.83014	1	0.688854	0.696192	1.75264	0.658957	0.668283	1.31811	0.6613	1.11728	1.45145	0.649923	0.640537	0.97472	134438	94852.8	261628	72444.4	109680	63008.2	105227	68182.8	73299.4	58037.7	41797.9	51687.9	44629.9	60353.6	54860.3	45909.9	33654.4	74036.4	48557.8	53869.6	73973.8	362689	55661.1	71711.7	80507.2	47451.7	56652.4
n1823	365.159	8.9404	C17H23N3O6	Glu-Ala-Phe	6	Peptide(tri-)	Hydrophobic peptide	136916	0.467994	1	0.873525	0.727044	1.04506	0.797897	0.686268	0.529075	0.498731	0.490491	0.51713	0.444136	0.438433	0.611274	42241.9	47716.1	50663.2	45895.6	44867.3	90033.6	130275	83992.6	117469	72646.5	82638	84533	85297.9	82952.9	96463.7	77376.7	48144.9	45879.4	93324.8	94737.1	80227.1	136916	103072	98880.9	97597.7	100090	64123.2
n1989	317.195	7.16	C14H27N3O5	Leu-Val-Ser	6	Peptide(tri-)	Hydrophobic peptide	1066618	0.81862	1	1.05842	0.983686	2.21841	0.993956	0.905296	1.42191	0.754468	4.07834	1.10388	0.801301	1.12924	0.377917	90108.7	129434	80906.3	121052	118347	108304	135833	157765	143759	113799	176781	116978	142145	136256	125824	135164	100585	148564	141424	122964	132017	803429	121992	258558	146958	151025	113767
n2080	303.143	12.6192	C12H21N3O6	Glu-Gly-Val	6	Peptide(tri-)	Hydrophobic peptide	145698	1.3395	1	1.06895	2.53408	1.43657	1.05447	2.41385	1.33548	0.800772	1.13995	1.14074	0.782137	1.05585	1.5571	75586.2	48348.5	95018.8	60334.6	54080.1	53176.9	51236.2	50831.5	49493.4	44136.4	46549.2	55319.3	47559.3	59433.3	57173.8	141090	106003	134715	123862	124999	48257.7	145698	52484.5	55468.6	55617.2	50014.3	45865.2
n637	317.195	7.57247	C14H27N3O5	Ile-Ser-Val	6	Peptide(tri-)	Hydrophobic peptide	3092707	1.17065	1	0.960102	1.0336	1.37528	0.921471	0.918167	0.998626	0.769402	1.03506	1.00257	0.770186	1.02215	1.04974	1.27153e+06	1.00144e+06	1.85257e+06	857945	1.03969e+06	859174	1.27089e+06	1.08035e+06	998836	935911	920273	1.0912e+06	927385	1.11907e+06	881946	1.23373e+06	704094	1.16723e+06	1.05027e+06	1.1627e+06	829597	3.09271e+06	988360	1.19758e+06	967815	966212	850187
n648	349.167	7.56641	C14H27N3O5S	Ile-Met-Ser	6	Peptide(tri-)	Hydrophobic peptide	1845566	1.37345	1	0.840823	1.00704	1.70466	0.983107	0.918319	0.981324	0.868164	1.25789	1.25081	0.879134	0.868983	1.08173	532571	445720	921295	312704	386710	309491	529178	407641	290658	355342	345298	341221	332333	255454	316791	439652	217378	514680	384617	349304	262942	1.84557e+06	300632	442362	374244	373882	404809
n663	331.211	7.54845	C15H29N3O5	Ile-Ile-Ser	6	Peptide(tri-)	Hydrophobic peptide	1116002	1.60999	1	0.98436	1.06557	1.56134	1.12001	1.05409	1.32169	0.925358	1.49879	1.3696	1.03391	0.836862	1.24527	485831	443439	809442	363460	376148	295453	357349	310652	285189	290696	316483	332855	274706	293818	297402	370360	181624	372483	371402	344400	256633	1.116e+06	305029	351867	373897	352329	342001
n666	287.185	7.57102	C13H25N3O4	Ile-Gly-Val	6	Peptide(tri-)	Hydrophobic peptide	1049856	1.19319	1	0.780675	1.08527	1.39122	0.93712	0.978808	1.19929	0.734138	1.25241	1.20808	0.810895	0.791702	0.920132	445214	391062	559198	258890	302501	309262	534159	295600	249972	251039	233100	219784	248140	270553	308756	370145	156651	321120	497548	434412	284575	1.04986e+06	267291	367865	312054	236046	347271
n678	303.179	7.58391	C13H25N3O5	Ile-Ala-Thr	6	Peptide(tri-)	Hydrophobic peptide	664205	1.41596	1	0.809496	0.91037	1.44612	0.864055	0.856228	1.29883	0.89525	0.928895	1.34887	0.998494	0.703295	1.19857	300065	300829	409696	239354	330870	185958	250729	236874	209687	233180	146228	173972	224608	183855	175082	232239	131707	268741	213906	169769	279220	664205	225894	205877	239292	170207	198629
n918	333.154	12.8298	C13H23N3O7	Glu-Ser-Val	6	Peptide(tri-)	Hydrophobic peptide	730250	0.928385	1	1.0564	1.45422	1.54923	1.11397	1.27221	0.947525	0.763178	1.16196	1.03211	0.736025	0.781897	0.993976	173790	185798	245069	175146	196520	170960	259762	184625	237254	199034	192273	226898	218398	220265	253114	381165	163857	270843	344084	369362	216528	730250	208730	246498	227225	248027	206682
p103	359.185	7.59875	C19H25N3O4	Phe-Pro-Pro	6	Peptide(tri-)	Hydrophobic peptide	4199159	0.636774	1	0.437046	0.271426	1.05712	0.591804	0.251545	0.782668	0.474743	0.661418	0.730067	0.418324	0.474788	0.496598	1.51428e+06	1.62255e+06	2.98453e+06	2.17744e+06	1.5922e+06	2.82645e+06	4.19916e+06	3.26928e+06	2.6056e+06	2.63248e+06	1.06717e+06	1.28765e+06	1.18683e+06	1.43049e+06	1.81648e+06	718983	675114	899853	895486	1.02662e+06	2.94681e+06	3.66978e+06	4.03949e+06	2.91516e+06	2.84898e+06	2.1016e+06	1.94065e+06
p107	341.232	7.55921	C17H31N3O4	Ile-Ile-Pro	6	Peptide(tri-)	Hydrophobic peptide	3464497	1.25221	1	0.870652	0.978989	1.26958	0.844952	0.953551	0.984219	0.746299	1.63203	0.928306	0.8788	1.03927	1.06152	1.71093e+06	1.18321e+06	3.18706e+06	809377	977121	1.40657e+06	1.46472e+06	1.1887e+06	1.18589e+06	1.03719e+06	1.08929e+06	1.19501e+06	1.22063e+06	987493	977937	1.48062e+06	705421	1.28718e+06	1.34702e+06	1.33081e+06	980337	3.25483e+06	1.30391e+06	1.22288e+06	1.21487e+06	1.00544e+06	1.17333e+06
p125	313.2	7.60026	C15H27N3O4	Val-Val-Pro	6	Peptide(tri-)	Hydrophobic peptide	1661001	0.948012	1	0.862587	0.909114	1.16496	0.951076	0.904106	1.03557	0.659504	1.55781	0.784365	0.635165	0.989927	0.726354	556542	338817	1.12413e+06	629552	875600	663568	783224	821734	804210	645189	487183	535460	835031	405460	943900	846719	386065	652870	721703	772662	778202	1.25567e+06	752643	701248	843487	955849	686187
p126	325.2	7.62956	C16H27N3O4	Ile-Pro-Pro	6	Peptide(tri-)	Hydrophobic peptide	1606300	0.685994	1	0.502552	0.475973	1.16073	0.561621	0.440922	0.836328	0.516362	0.736049	0.721485	0.411944	0.480068	0.711604	574694	674056	1.0283e+06	649518	690258	921176	1.30179e+06	1.04862e+06	1.01947e+06	981330	350273	762996	428291	536075	572011	627167	202987	416897	542735	719727	1.03701e+06	1.41318e+06	1.42844e+06	1.02848e+06	1.21269e+06	690227	527889
p1392	359.205	9.28681	C16H29N3O6	Glu-Ile-Val	6	Peptide(tri-)	Hydrophobic peptide	613814	1.21182	1	0.732264	1.10829	1.46439	0.816501	0.984834	1.19135	0.869103	1.5003	1.14509	0.98747	0.921982	1.01139	211408	177803	391243	137748	200931	139275	235511	182751	161787	204190	114414	149656	122527	129925	159732	208397	119495	249056	211168	235407	174331	613814	197105	174092	193039	135779	171124
p1540	317.159	10.9902	C13H23N3O6	Glu-Ala-Val	6	Peptide(tri-)	Hydrophobic peptide	253382	0.739354	1	0.959859	1.75149	1.0839	1.07962	2.21296	0.735135	0.810308	0.613098	0.70956	0.472607	0.416257	0.952664	75082.6	48188	74655	82630.4	70051.8	99667.7	98717.4	98235.1	102555	75033.1	76702.3	91992.2	77269.5	97266.3	111943	190785	198841	139094	152153	149698	95301.6	136475	105772	84210.2	92236.2	99626.9	121380
p1604	365.125	11.8707	C13H23N3O7S	Glu-Met-Ser	6	Peptide(tri-)	Hydrophobic peptide	227087	0	0	63.5966	162.919	0	51.4826	176.234	0	0	0	0	0	25.6938	54.142	0	0	0	0	0	0	0	0	0	0	57278.8	62784.5	46169.9	82112.1	69637.8	159818	195389	151831	157547	150012	0	0	0	0	0	57208.6	50049.4
p2045	349.164	8.45835	C17H23N3O5	Ala-Pro-Tyr	6	Peptide(tri-)	Hydrophobic peptide	186321	0.428974	1	0.471122	0.285789	1.13469	0.542587	0.294391	0.5386	0.422301	0.748412	0.610042	0.374489	0.429445	0.498423	23474.7	39556.9	70826.3	83777.7	42085.2	145187	150855	113886	96233.1	99284.8	62274.8	50467.4	54977.4	56472.6	61046.9	63076.2	13198.4	33443.1	38348	24964.4	136050	186321	134071	125518	105035	77376.7	62641
p2114	271.153	9.85269	C12H21N3O4	Val-Gly-Pro	6	Peptide(tri-)	Hydrophobic peptide	1055094	0.533924	1	1.21053	0.792728	1.20848	1.19985	0.739458	0.455361	0.657083	0.697573	0.541053	0.477463	0.536736	0.715613	225388	289629	498908	352173	284456	588123	661955	499031	826480	515774	770259	690196	579120	810958	891662	614147	292894	353558	584863	605147	655856	1.05509e+06	602273	738212	684406	846033	647586
p2397	357.19	11.372	C16H27N3O6	Glu-Ile-Pro	6	Peptide(tri-)	Hydrophobic peptide	1631925	1.01777	1	0.796088	0.900791	1.3557	0.90688	0.994492	0.884245	0.724985	1.3373	0.9717	0.722028	0.788093	0.914875	498058	575212	1.00702e+06	649043	531046	637883	732900	565078	739297	528294	321418	624689	463911	549873	590338	622870	325638	497926	713520	725688	590521	1.63193e+06	695873	776442	648169	548069	551871
p2458	329.195	7.69668	C15H27N3O5	Ile-Pro-Thr	6	Peptide(tri-)	Hydrophobic peptide	705539	0.558981	1	0.552161	0.332722	1.03905	0.587637	0.318095	0.721376	0.419484	0.63845	0.6689	0.400366	0.342	0.681621	212126	278047	295647	322789	259661	568272	668505	169672	623863	417482	201360	276927	313502	298954	260832	160787	95875.2	115830	198746	243196	481759	440352	705539	413239	502496	295237	289535
p252	285.169	7.88583	C13H23N3O4	Leu-Gly-Pro	6	Peptide(tri-)	Hydrophobic peptide	2465970	1.03934	1	0.813481	1.07983	1.39259	0.802925	1.02327	0.923432	0.702398	1.43381	0.950779	0.769677	0.907324	0.92189	836614	969970	1.50634e+06	973752	742618	901611	1.15632e+06	956940	1.05947e+06	764584	682967	807396	833248	839372	773394	1.33645e+06	571436	922813	1.16629e+06	1.22823e+06	957860	2.46597e+06	1.1204e+06	1.20348e+06	990941	809033	829379
p2567	259.153	8.56654	C11H21N3O4	Ile-Ala-Gly	6	Peptide(tri-)	Hydrophobic peptide	1035995	1.38196	1	0.534298	0.59519	1.19325	0.603075	0.602042	1.41036	0.600156	1.21497	1.15983	0.662908	0.953208	0.830451	516008	446536	848259	387558	434005	358748	508336	346791	287243	403681	202947	208583	194966	201833	209401	215910	154189	373505	186588	203524	332506	1.036e+06	327683	299430	277283	226135	236601
p257	381.189	7.90556	C18H27N3O6	Ile-Ser-Tyr	6	Peptide(tri-)	Hydrophobic peptide	438422	1.28621	1	0.821286	0.950645	1.48607	0.840575	0.963705	1.13823	0.983537	1.36153	1.14158	0.948559	1.0942	1.01218	176910	159739	312228	147333	131399	149250	164162	145446	124673	137667	124897	134266	108139	108277	116731	148140	95834.6	168279	131303	142047	147563	438422	165765	170104	149897	102412	114072
p273	305.159	14.3998	C12H23N3O6	Ile-Ser-Ser	6	Peptide(tri-)	Hydrophobic peptide	785801	0	0	0	344.869	0	0	509.291	0	0	0	0	0	181.863	83.4313	0	0	0	0	0	0	0	0	0	0	0	0	0	0	0	409891	362743	450202	228432	273075	0	0	0	0	0	0	0
p2733	343.174	12.7204	C15H25N3O6	Glu-Pro-Val	8	Peptide(tri-)	Hydrophobic peptide	2470311	0.555293	1	0.576872	0.34451	1.01727	0.630067	0.342938	0.584366	0.538818	0.533583	0.691403	0.410471	0.383228	0.496915	859638	1.0777e+06	1.06749e+06	1.25113e+06	1.03686e+06	1.92929e+06	2.08765e+06	2.04241e+06	1.7714e+06	1.70082e+06	1.13365e+06	1.05901e+06	1.00789e+06	1.11053e+06	1.18742e+06	707358	485306	578989	717596	794473	2.06422e+06	1.64636e+06	2.47031e+06	1.66397e+06	1.85133e+06	1.21536e+06	1.25979e+06
p319	347.169	10.8789	C14H25N3O7	Glu-Ile-Ser	6	Peptide(tri-)	Hydrophobic peptide	648566	0.672996	1	1.55905	1.2206	1.23044	1.45375	1.13831	0.57147	0.970866	0.928011	0.752902	0.685634	0.758947	0.965845	139874	205122	283103	269583	243906	368643	322089	272629	409754	323165	523165	455437	471173	584997	609819	498310	232579	355569	485146	498875	371032	648566	280464	357097	430009	468273	481462
p3241	393.121	15.0353	C14H23N3O8S	Glu-Asp-Met	6	Peptide(tri-)	Hydrophobic peptide	443289	0	0	11.9799	349.415	0	0	328.577	0	0	0	0	0	26.6529	92.2596	0	0	0	0	0	0	0	0	0	0	0	0	17084.2	24447.9	18367.5	364240	443289	332648	311492	295404	0	0	0	0	0	0	0
p3389	379.141	12.0972	C14H25N3O7S	Glu-Met-Thr	8	Peptide(tri-)	Hydrophobic peptide	420286	0	1	32.7397	104.356	1.98613	25.5769	99.2794	0	9.40373	0	0	1.5388	29.0312	29.3854	0	0	0	0	0	0	0	0	16528.4	0	60776.9	116815	93415.6	150525	119603	183937	408932	376367	344812	410797	0	32827.5	0	0	0	64104.7	120732
p3605	303.143	11.7635	C12H21N3O6	Glu-Gly-Val	8	Peptide(tri-)	Hydrophobic peptide	264132	0.705663	1	0.685268	1.09348	0.637401	0.688004	1.11729	0.692648	0.57409	0.652484	0.777398	0.476799	0.525514	0.601769	97263.4	115432	138291	160913	111941	209843	128736	178840	202811	163819	107074	109433	138145	140829	110330	250074	209880	177987	170366	158385	142754	113973	103648	90218.9	112900	139023	107720
p93	327.216	7.57811	C16H29N3O4	Ile-Pro-Val	6	Peptide(tri-)	Hydrophobic peptide	6000518	1.10935	1	0.815744	0.998268	1.32465	0.881788	1.01434	0.985513	0.706245	1.47472	0.936417	0.779549	0.910813	0.916554	2.64924e+06	2.02936e+06	5.47018e+06	2.25291e+06	1.79575e+06	2.32792e+06	3.02798e+06	2.91765e+06	2.49141e+06	2.03298e+06	2.02604e+06	2.26714e+06	1.90141e+06	2.03954e+06	2.2057e+06	3.04341e+06	1.662e+06	2.48496e+06	2.76038e+06	2.82503e+06	2.50598e+06	6.00052e+06	2.67587e+06	2.72889e+06	3.04157e+06	2.66712e+06	1.94447e+06
p2260	309.169	15.5077	C15H23N3O4	Pro-Pro-Pro	6	Peptide(tri-)	Nonpolar peptide	831078	1.81215	1	0.859807	0.979193	1.4734	0.869159	0.892671	1.60638	1.23191	1.43992	1.60957	1.38245	1.03998	1.12993	389788	246180	831078	226632	314172	182634	291715	257410	171676	204556	199087	206082	207380	166352	173759	191446	140861	203414	243899	305318	164112	660543	291129	274658	242071	156353	249965
p2301	257.138	15.1885	C11H19N3O4	Ala-Ala-Pro	6	Peptide(tri-)	Nonpolar peptide	1567908	0.825902	1	0.98297	0.611634	1.05988	0.929122	0.602862	0.662861	0.799238	0.799838	0.725691	0.662927	0.628174	0.764641	872272	929629	1.2593e+06	1.05372e+06	924801	1.23138e+06	1.21494e+06	1.01627e+06	1.45758e+06	1.18191e+06	1.29793e+06	1.12907e+06	1.20367e+06	1.19688e+06	1.17061e+06	872507	518882	683795	778113	878942	1.35908e+06	1.44438e+06	1.13484e+06	1.23234e+06	1.29684e+06	1.13122e+06	1.07636e+06
p2981	257.138	16.1746	C11H19N3O4	Ala-Ala-Pro	8	Peptide(tri-)	Nonpolar peptide	1055386	0.788595	1	1.36758	0.633671	1.12641	1.4477	0.636295	0.567112	1.20832	0.778192	0.71384	0.793924	0.682406	0.890495	298683	557615	772994	577820	469430	635557	617559	625390	796651	718909	950876	933289	1.00381e+06	873326	880340	555178	302531	351879	425497	515634	698790	989175	621163	737338	776659	905893	1.05401e+06
p3873	257.138	11.0393	C11H19N3O4	Ala-Ala-Pro	8	Peptide(tri-)	Nonpolar peptide	122837	0.916769	1	0.543789	0.51495	1.06157	0.664946	0.393179	0.939415	0.449846	0.706957	0.884992	0.463622	0.435591	0.621684	89139	97138.9	94002.5	104002	73527.9	102714	94586.5	90904.7	114233	96935.1	31936.6	67968.8	51458.6	54035.9	66153.8	56437.9	38166.2	26043.9	63006.9	73497.5	122837	103318	112892	93780.8	97291.7	69261.7	65005.8
p3882	283.153	11.7187	C13H21N3O4	Ala-Pro-Pro	8	Peptide(tri-)	Nonpolar peptide	135587	0.539498	1	0.859946	0.375261	1.1811	0.825065	0.388475	0.600054	0.705175	0.543478	0.676094	0.519772	0.349122	0.605005	34738.8	60186.3	41619.8	72201.6	61824.8	115313	94617.3	95357	112846	83390.2	97355.3	74125.9	83350.9	85284.9	91166.6	40259.1	23932.8	30201.7	57115.6	36693.1	135587	98588.5	128888	115724	113560	93641.4	74223.5
n1337	274.128	12.8544	C10H18N4O5	Ala-Ala-Asn	6	Peptide(tri-)	Polar peptide	821225	0.279713	1	1.86318	0.733632	0.673068	1.41372	0.771204	0.604748	1.01796	0.26575	0.496894	0.572782	0.265779	0.731242	63700.3	96948.1	66189.3	107995	91170.4	217076	289363	285881	477892	252787	312633	469940	522803	711016	821225	262959	219756	141889	217430	275286	198926	254908	162618	215558	193072	385071	358720
n1344	260.112	13.0008	C9H16N4O5	Ala-Asn-Gly	6	Peptide(tri-)	Polar peptide	284902	0.868411	1	1.59911	1.9469	1.21414	1.55344	1.92462	1.10241	1.49514	0.898233	1.05898	1.1665	0.810657	1.36265	91013.8	89467.5	68965.1	84564.2	107857	105695	119046	103502	94865.5	85714.4	145660	151635	146440	206034	163898	221901	178978	197200	174091	218459	86949.1	284902	68785.7	84598	92549	143070	172950
n2002	249.078	13.9225	C8H15N3O4S	Ala-Cys-Gly	6	Peptide(tri-)	Polar peptide	137932	0	0	0	77.5107	0	0	91.7118	0	0	0	0	0	0	17.3019	0	0	0	0	0	0	0	0	0	0	0	0	0	0	0	117503	62302.2	75227	85202.1	47318.7	0	0	0	0	0	0	0
n917	233.101	12.8489	C8H15N3O5	Ala-Gly-Ser	6	Peptide(tri-)	Polar peptide	759830	1.10428	1	0.988203	1.23527	1.53519	0.971855	1.17102	1.05155	0.781805	1.24108	1.12209	0.797743	1.11774	1.01997	265318	218983	283431	193949	221603	187675	213297	240643	229789	200141	210621	207884	210896	234641	194862	285915	175369	336709	258889	266770	219307	759830	224136	191687	250062	206285	225555
p1444	247.117	15.8752	C9H17N3O5	Ala-Ala-Ser	6	Peptide(tri-)	Polar peptide	2148327	0	0	0	789.357	0	0	1205.38	0	0	0	0	0	149.018	180.145	0	0	0	0	0	0	0	0	0	0	0	0	0	0	0	1.18462e+06	610004	866467	756275	529419	0	0	0	0	0	0	0
p1845	243.122	12.5315	C10H17N3O4	Ala-Gly-Pro	6	Peptide(tri-)	Polar peptide	7805439	0.734701	1	0.647656	0.441946	1.15701	0.68478	0.471179	0.592417	0.542665	1.64889	0.708513	0.424093	0.74109	0.609396	2.06393e+06	2.51191e+06	2.39488e+06	2.41488e+06	1.86245e+06	3.38093e+06	3.27014e+06	3.13798e+06	2.98735e+06	2.5333e+06	2.3587e+06	1.67304e+06	1.92938e+06	1.89578e+06	2.05852e+06	1.51363e+06	862592	1.06687e+06	1.77287e+06	1.55009e+06	3.69407e+06	4.37227e+06	3.4148e+06	3.00014e+06	3.23215e+06	2.29616e+06	1.90206e+06
p1854	300.144	12.4867	C12H20N4O5	Ala-Asn-Pro	6	Peptide(tri-)	Polar peptide	167788	0.84267	1	0.623929	0.328668	1.03585	0.607523	0.301862	0.729016	0.530683	0.607753	0.84339	0.538964	0.352152	0.536348	103579	151961	109286	106370	84988.6	140692	119648	145180	121814	132692	94573.8	81767.8	67541.3	86632.9	81294.3	40835.8	46291	38147.4	44084.2	47571.7	167788	128883	145348	124587	117080	74505.4	94503.3
p2081	290.123	16.5978	C10H18N4O6	Ala-Asn-Ser	8	Peptide(tri-)	Polar peptide	5669067	0.285171	1	3.4134	3.84518	1.2704	3.06969	3.44959	0.499144	0.965608	0.360643	0.454251	0.72692	1.55497	1.90335	181909	356598	331816	516310	292293	606221	957075	1.26445e+06	1.73396e+06	1.32573e+06	2.26066e+06	3.63683e+06	3.19806e+06	5.66907e+06	5.33153e+06	5.2916e+06	3.59379e+06	3.23031e+06	4.91548e+06	5.60707e+06	931343	1.12994e+06	1.33484e+06	2.02236e+06	2.06092e+06	2.88775e+06	3.44265e+06
p2192	247.117	12.1201	C9H17N3O5	Thr-Ala-Gly	6	Peptide(tri-)	Polar peptide	547849	1.27851	1	0.746144	1.21803	1.29614	0.750214	1.25512	1.17029	0.550129	1.98839	1.17739	0.613345	1.04217	0.900043	221852	212191	312385	158716	161559	153356	212678	152185	165663	150451	97473.1	112849	116638	149684	145888	240185	102549	144459	256453	272597	190869	432957	168699	132193	156691	142173	125283
p2302	287.148	15.1754	C12H21N3O5	Thr-Ala-Pro	6	Peptide(tri-)	Polar peptide	589351	0.93441	1	0.952152	0.76757	1.09161	0.996572	0.758009	0.660566	0.640076	0.986227	0.681793	0.58506	0.570815	0.79988	329656	277774	506472	312033	276740	368492	400727	306734	422754	323484	309193	339137	336936	372818	376918	280184	203235	227650	299619	387972	355552	497896	304611	426138	404925	371610	309066
p3017	229.106	13.1289	C9H15N3O4	Gly-Gly-Pro	8	Peptide(tri-)	Polar peptide	1046629	0.760446	1	0.471091	0.434639	1.11374	0.481763	0.467638	0.857853	0.452202	1.51726	0.939885	0.474716	0.816806	0.642197	381927	376720	348165	341742	278635	509302	561638	461198	353691	385457	223507	186728	213877	214976	230893	243665	135961	228348	192697	186519	484998	889805	451489	376663	326664	204872	214511
p3338	313.164	11.9891	C14H23N3O5	Thr-Pro-Pro	8	Peptide(tri-)	Polar peptide	719738	0.593891	1	0.536153	0.127675	0.977207	0.528916	0.143481	0.554733	0.463092	0.27441	0.615538	0.360556	0.306533	0.403595	268607	336198	317352	455070	370148	691985	453686	524117	592507	679956	454918	243803	256747	294635	327392	51333.4	74760.7	65781.1	88482.7	95293.6	719738	400408	635218	501726	618097	361105	244038
p3339	326.159	11.9698	C14H22N4O5	Asn-Pro-Pro	6	Peptide(tri-)	Polar peptide	188999	0.989313	1	0.402957	0.0254701	1.14837	0.411859	0.0439896	0.728533	0.456317	0.152151	0.839361	0.355472	0.0615891	0.489358	80197.3	101855	111282	159540	123965	148619	113023	127895	95663.8	97869.7	47732.5	43918.4	43446.6	52691.4	47163.4	0	0	0	14850.9	0	188999	120131	143119	100994	116336	52784.6	50634.2
p3522	273.133	10.8956	C11H19N3O5	Ala-Pro-Ser	8	Peptide(tri-)	Polar peptide	424815	0.668207	1	0.819864	0.42087	1.03763	0.87667	0.444236	0.588443	0.682645	0.741452	0.717984	0.535631	0.448103	0.630017	166420	285340	236078	260552	256740	424815	323306	324204	379970	351235	287089	248257	294904	291293	357107	172031	132369	98351.8	172841	183460	404614	323784	424593	371943	346457	328573	301791
p3703	316.138	13.0953	C12H20N4O6	Asn-Pro-Ser	8	Peptide(tri-)	Polar peptide	388676	1.21601	1	0.21298	0	0.902338	0.262363	0.0375598	1.50279	0.158205	0.18633	2.01565	0.224964	0.0313919	0.467323	165076	142250	100660	130409	160123	157264	122144	124008	52364.2	118655	19633.7	25989.4	30791.6	18265.6	27663	0	0	0	0	0	153898	83979.3	98689.8	93242.2	88525.9	26289.4	29284.7
p3806	269.137	12.2062	C12H19N3O4	Gly-Pro-Pro	8	Peptide(tri-)	Polar peptide	222537	0.592426	1	0.833442	0.293805	1.16833	0.859956	0.313128	0.571318	0.673922	0.446077	0.634277	0.483943	0.313617	0.552182	77218.7	90024.2	99228.3	116140	80968.3	200067	123687	152288	165160	141309	152345	116454	124744	123904	134729	41191.7	46338.9	41292.1	56865.8	44217.2	222537	141873	173541	188428	187850	128040	137449
n1304	234.085	15.3348	C8H14N2O6	L-beta-aspartyl-L-threonine	6	Peptides	Undefined	491655	0.796003	1	2.30271	2.73545	1.38441	2.11664	2.593	0.634328	0.927656	0.919394	0.742024	0.611309	0.851851	1.46904	129795	113012	189639	121346	106810	145464	166701	139007	240322	138406	348416	364119	303127	478573	416783	468980	396639	461644	451232	491655	154161	461497	153722	181479	198060	351376	360514
n1421	218.072	7.61134	C8H14N2O3S	Cysteinyl-Proline	6	Peptides	Undefined	151504	0.611155	1	2.34041	2.43071	1.60836	1.70473	2.73423	0.61854	1.24284	2.62284	1.32412	1.35536	2.04001	2.03385	0	0	45955.2	0	35311	19998.6	15531.1	26504.8	47697.8	23239.3	74392.7	83937.6	52827.2	41867.8	58183	82900.5	36332.5	72644.9	81262.4	50075	18787.6	104086	29283.5	28983.9	32725.3	51443.1	42877.7
n1528	252.122	12.6035	C11H16N4O3	Prolyl-Histidine	6	Peptides	Undefined	383490	0.875771	1	1.04839	1.0096	1.07068	1.05705	0.732623	0.637448	0.751083	0.824359	0.749092	0.788106	0.747744	0.863639	247894	190597	380034	183651	189531	311080	241406	248107	330487	229673	321632	286629	258281	294542	265513	318444	168721	287382	291784	307478	278457	349948	207577	313785	307167	270628	272974
n1643	192.075	13.0421	C6H12N2O5	Serinyl-Serine	6	Peptides	Undefined	607686	2.09235	1	1.06983	1.4164	1.69826	1.08081	1.29964	1.13871	0.952287	2.10603	1.28774	1.10976	1.75451	1.42046	293078	137774	488324	151025	157590	105488	172524	127243	92817.9	88727.5	108656	152730	100686	145409	120296	152235	89883.1	302559	123946	162522	75848.3	607686	68927.2	136095	107981	97862.8	136895
n1958	216.147	7.21278	C10H20N2O3	Valyl-Valine	6	Peptides	Undefined	1958038	0.929996	1	0.798373	0.949063	6.26423	0.836599	0.87493	2.69333	0.76863	6.18618	1.39636	0.884128	1.08202	0.413195	68356.9	100234	70390.5	100321	96252.1	71717.5	108602	127108	70410.4	90501.7	104146	63966.4	81611	65259.7	58926.2	111939	46490.7	103226	88313.7	94514.4	87620.7	1.95804e+06	108547	679382	100198	93608.6	60845.9
n3079	204.075	15.188	C7H12N2O5	L-beta-aspartyl-L-alanine	6	Peptides	Undefined	117048	0.974347	1	1.01795	1.36021	1.58804	1.0376	1.24611	0.991689	0.665885	0.879737	1.04369	0.665359	0.682545	1.10794	56566.5	51681.8	56444.3	41055.7	34864.2	52423.1	55840.4	47075.5	47300.4	44307.9	42805.1	50920.1	50704.1	53407.6	53543.9	78784.9	51290.5	73245.5	66147.5	66431.8	69393.3	117048	63085.8	72874.3	69760.1	45582.8	54102
n909	246.121	12.8406	C10H18N2O5	L-beta-aspartyl-L-leucine	6	Peptides	Undefined	5178864	0.887329	1	1.11946	1.81866	1.74919	1.1529	1.69573	0.858057	0.843815	1.34881	1.04167	0.775298	0.903316	1.08353	1.01216e+06	992567	1.50365e+06	975426	1.04331e+06	1.06944e+06	1.31382e+06	1.21082e+06	1.39729e+06	1.23755e+06	1.19935e+06	1.33785e+06	1.41217e+06	1.55592e+06	1.46777e+06	2.9087e+06	1.08223e+06	1.95894e+06	2.54354e+06	2.83491e+06	1.32289e+06	5.17886e+06	1.43616e+06	1.38616e+06	1.57152e+06	1.438e+06	1.33017e+06
n926	162.064	12.8089	C5H10N2O4	Glycyl-Serine	6	Peptides	Undefined	375402	1.06116	1	1.2204	1.73112	1.39914	1.17011	1.64279	1.13552	0.937393	1.27386	1.20504	0.875355	1.54667	1.25721	124314	145201	154185	136529	127025	126189	109913	142955	134205	134383	156584	155060	151092	171645	156001	255311	166419	228609	234801	236014	127978	375402	125306	133533	143924	133837	154300
p1081	268.154	5.45803	C12H20N4O3	Histidinyl-Isoleucine	6	Peptides	Undefined	3758141	1.97619	1	0.74565	1.28534	1.49336	0.719772	1.08353	1.0854	0.874297	2.12855	1.19985	1.01575	0.974333	2.18607	1.03595e+06	567406	2.83647e+06	648292	779080	532939	568257	697271	471429	699050	391384	485272	450980	421565	464594	765775	438877	1.05393e+06	755945	801583	580223	1.89287e+06	673675	647608	639328	349639	456385
p1278	273.18	14.2945	C11H23N5O3	Valyl-Arginine	6	Peptides	Undefined	3722744	1.62642	1	1.06695	1.8939	1.68977	1.15613	1.78141	1.23449	1.17966	1.74713	1.29079	1.27455	1.35239	1.40899	1.17964e+06	895623	3.56652e+06	977434	1.13463e+06	826753	1.11775e+06	1.03273e+06	856663	933524	1.04634e+06	1.04032e+06	1.23074e+06	897463	871746	1.69932e+06	1.02239e+06	2.18731e+06	1.91687e+06	2.20314e+06	970713	3.72274e+06	1.03327e+06	1.15852e+06	1.1706e+06	862794	1.31002e+06
p1279	245.174	14.4218	C11H23N3O3	Valyl-Lysine	6	Peptides	Undefined	2944147	1.71766	1	1.00731	2.00653	1.51321	1.13233	1.91014	1.12377	0.941165	2.16869	1.1785	1.06768	1.6963	1.45892	1.13597e+06	844168	2.73051e+06	809994	1.04971e+06	670149	881811	805530	721317	746363	824036	836007	731382	790863	670854	1.81717e+06	814103	1.32676e+06	1.80403e+06	1.91327e+06	630443	2.89115e+06	669714	856577	740400	1.05776e+06	901097
p1310	244.179	5.00726	C12H24N2O3	Isoleucyl-Leucine	8	Peptides	Undefined	22666260	1.44794	1	0.73978	0.915591	1.36393	0.779697	0.899298	1.33044	0.83035	1.45804	1.38509	0.965629	1.10564	0.954689	1.03287e+07	9.25825e+06	1.94644e+07	9.10901e+06	1.02078e+07	7.03667e+06	9.32815e+06	9.32236e+06	6.27017e+06	8.35371e+06	6.64199e+06	6.17162e+06	5.67734e+06	5.68767e+06	5.6427e+06	6.86826e+06	5.12894e+06	1.10087e+07	6.22578e+06	7.67675e+06	7.3137e+06	2.26663e+07	7.60684e+06	7.95334e+06	9.44132e+06	5.21624e+06	7.43491e+06
p1316	264.147	5.08145	C14H20N2O3	Valyl-Phenylalanine	6	Peptides	Undefined	6627771	1.54137	1	0.799331	0.865094	1.41691	0.775645	0.864436	1.37087	0.954388	1.606	1.33601	1.14169	1.1527	0.966126	2.81415e+06	2.4448e+06	6.09275e+06	2.4769e+06	2.85536e+06	2.15754e+06	2.3625e+06	2.61087e+06	1.54942e+06	2.14381e+06	1.83254e+06	1.81545e+06	1.83697e+06	1.52984e+06	1.63728e+06	1.63313e+06	1.53982e+06	3.13892e+06	1.53538e+06	1.51664e+06	2.06531e+06	6.62777e+06	2.18108e+06	2.03973e+06	2.42292e+06	1.53711e+06	1.94646e+06
p1389	254.138	9.12294	C11H18N4O3	Valyl-Histidine	6	Peptides	Undefined	705433	1.44679	1	0.813409	1.18125	1.60042	0.923144	1.00945	1.33644	1.00033	1.81307	1.44763	1.25057	1.34095	0.98134	185868	273183	493378	216780	247925	191882	246688	156818	188570	195546	149962	145797	149739	198967	152273	226299	144075	276516	239889	270265	225905	705433	225119	200652	210509	165910	210314
p162	246.122	15.2894	C10H18N2O5	L-beta-aspartyl-L-leucine	6	Peptides	Undefined	18926376	0.749468	1	0.772918	2.29859	0.811808	0.664406	2.49126	0.617841	0.507496	0.483068	0.654928	0.354212	2.20462	1.19015	2.46109e+06	3.05334e+06	2.73879e+06	4.85714e+06	3.69696e+06	5.34232e+06	4.23766e+06	3.23824e+06	5.75838e+06	3.84906e+06	4.00059e+06	3.61558e+06	2.89622e+06	3.68607e+06	3.13474e+06	1.5129e+07	1.05452e+07	9.74636e+06	8.86134e+06	7.26554e+06	4.88995e+06	2.68176e+06	3.10584e+06	3.74359e+06	3.78421e+06	3.04164e+06	2.82315e+06
p178	337.175	15.4131	C15H23N5O4	Arginyl-Tyrosine	6	Peptides	Undefined	613119	1.13022	1	1.44679	1.19557	1.36262	1.36159	1.22908	0.933515	1.26323	1.07741	1.06711	1.09625	1.00616	1.21735	285361	240779	504803	269183	258139	242092	294590	289376	243476	309187	423250	372856	409382	376052	413179	252960	284722	373682	372810	364187	260085	613119	398066	299859	307540	302363	392636
p1916	278.163	4.81608	C15H22N2O3	Isoleucyl-Phenylalanine	8	Peptides	Undefined	6849119	1.49473	1	0.762896	0.77175	1.47598	0.837544	0.82132	1.3927	0.90674	1.30071	1.38237	1.03938	1.08061	0.930593	2.13783e+06	2.44976e+06	6.12013e+06	2.38058e+06	2.74571e+06	1.86332e+06	2.59371e+06	2.18358e+06	1.90952e+06	2.0431e+06	1.76072e+06	1.48457e+06	1.91973e+06	1.44815e+06	1.46836e+06	1.31674e+06	1.36e+06	2.5638e+06	1.44744e+06	1.48734e+06	1.91505e+06	6.84912e+06	2.40599e+06	2.22208e+06	2.24311e+06	1.55307e+06	2.34042e+06
p2044	218.073	8.45261	C8H14N2O3S	Cysteinyl-Proline	6	Peptides	Undefined	197369	1.22623	1	0.981654	1.00659	1.16727	0.956994	1.40686	1.17129	1.11138	1.33067	1.0489	1.25514	1.41701	1.11848	103187	99071.4	194612	108987	80245.7	91424.7	85486.4	112173	95092.1	93793.9	103365	78660.1	102657	106773	77746.5	88419	89744.8	100857	99602.1	102497	94258.4	154762	110564	109351	88983.3	82938.5	105099
p2092	262.08	16.636	C9H14N2O7	L-beta-aspartyl-L-glutamicacid	6	Peptides	Undefined	254059	0.60372	1	1.38572	1.03917	0.948264	1.31284	1.03352	0.533173	0.767695	0.577643	0.628414	0.585943	0.571043	0.917197	78815.6	75403	107559	93863.4	71404.2	120586	139075	115863	194703	137130	202624	186351	142799	254059	194366	155034	121824	151117	147989	159101	133555	166509	104486	135212	130999	172500	177217
p2191	283.128	12.098	C11H17N5O4	Gamma-glutamyl-Histidine	6	Peptides	Undefined	552653	1.53228	1	0.763073	1.27771	1.42963	0.808724	1.27469	1.12463	0.732298	1.85565	1.20693	0.759735	1.56853	0.999782	199814	177325	479987	154314	164501	138321	183983	174260	138546	132337	126812	127292	91935.1	122782	116797	203518	131743	247679	198464	199167	139714	550608	133202	136723	136922	113149	137499
p220	309.169	17.0522	C15H23N3O4	Lysyl-Tyrosine	6	Peptides	Undefined	276228	0.884513	1	3.85011	3.01198	1.04634	3.94278	2.5861	0.588715	3.32568	1.08739	0.740271	2.50136	2.5712	3.18111	43286	49569.4	81618.1	49819.2	46839.4	58073.7	53461.2	58328.4	75406.3	61263	233178	276228	222570	227803	220403	172046	130171	201015	205718	214320	42466.8	70451.1	56010.7	71789.3	80019.5	209482	228589
p2231	293.174	13.1406	C15H23N3O3	Lysyl-Phenylalanine	6	Peptides	Undefined	517892	0.993853	1	1.26976	2.28385	1.53555	1.21464	2.14012	1.13176	0.980069	0.787794	1.29302	0.889491	0.897787	1.38975	148306	151101	130974	140692	171173	163061	145366	153940	143454	141017	230029	164644	221748	172425	159457	375245	231676	390201	329413	379130	135034	517892	157608	140896	195377	142753	217598
p2252	729.351	9.82792	C43H47N5O6	Jubanine B	6	Peptides	Undefined	1071239	0.499426	1	1.05307	0.694853	1.25189	1.12988	0.687324	0.41109	0.563372	0.804792	0.488195	0.428293	0.774435	0.657036	169263	208125	379326	286530	170599	439388	642169	400881	581555	366485	662925	523525	444324	475281	453398	340087	204099	348293	438848	357499	479033	1.07124e+06	432285	530186	529949	665151	542824
p2398	262.099	11.4923	C10H18N2O4S	Methionyl-Hydroxyproline	6	Peptides	Undefined	958925	1.27969	1	0.780775	0.968865	1.15951	0.846628	0.909582	1.20755	1.02934	1.32111	1.15185	1.158	1.03836	0.95891	665718	605761	882032	504823	533689	442340	531208	539902	461598	519319	408225	362972	371554	388588	416201	447136	412685	530304	516856	509725	528837	800731	522223	471397	569053	361408	414324
p2481	260.137	11.7279	C11H20N2O5	L-gamma-glutamyl-L-isoleucine	8	Peptides	Undefined	2914333	1.165	1	0.873391	1.27073	1.48758	0.94113	1.39273	1.03926	0.895669	2.21123	1.0988	0.973082	1.24691	1.08571	849444	881841	1.64831e+06	746833	729653	650859	1.02735e+06	838630	908102	743381	585796	738388	679651	854385	782357	1.37517e+06	630996	1.02427e+06	903837	1.36256e+06	829307	2.79519e+06	851082	861248	863902	762046	738470
p2655	218.09	9.61389	C8H14N2O5	Serinyl-Hydroxyproline	6	Peptides	Undefined	112676	0.754174	1	1.2107	1.02808	1.21845	1.26906	1.04908	0.644245	0.921206	1.11597	0.77993	0.766047	0.948605	0.922245	27496.5	63606.9	70337.9	45317.6	28582	50543.5	48539.5	59560.2	85354.8	68053.4	84225.4	85359.7	55645.1	75737	76832.9	69483.5	49924.6	59464.8	70850.3	71089.4	71725.4	100499	42317.5	81431.8	84244.3	58949.9	69564.1
p2762	337.175	16.8268	C15H23N5O4	Tyrosyl-Arginine	6	Peptides	Undefined	287966	0.920593	1	1.11491	0.754346	1.18787	1.17345	0.76699	0.662452	0.877962	0.819625	0.729087	0.707757	0.692058	0.855338	156146	146672	258174	182444	158856	182873	199382	212173	203625	182068	207605	226640	215143	215343	228018	153503	121683	122533	170093	171538	228275	227348	210907	245940	251788	232078	213093
p2849	261.133	18.0338	C10H19N3O5	Gammaglutamylornithine	6	Peptides	Undefined	200494	0.76204	1	1.24889	0.864035	1.17849	1.25871	0.778699	0.513855	0.668138	0.622676	0.639902	0.524872	0.506293	0.83873	76312.4	75454.8	125497	98084.2	69544.6	124068	104276	106899	140385	108191	168852	146639	136654	138341	138640	114016	83889.1	111088	97845.7	97601.1	114454	200494	117522	123179	132373	144173	158503
p2863	233.101	11.0442	C8H15N3O5	Serinyl-Glutamine	6	Peptides	Undefined	874606	0	0	89.1987	735.164	0	67.9106	631.452	0	0	0	0	0	163.185	171.22	0	0	0	0	0	0	0	0	0	0	65876.4	99765	79328.3	125920	75104.1	853427	874606	756433	631478	559874	0	0	0	0	0	62499.5	79796.8
p2874	252.122	10.0927	C11H16N4O3	Prolyl-Histidine	8	Peptides	Undefined	1183697	0.773947	1	0.875894	0.835098	1.15079	0.751479	0.780774	0.708851	0.507946	0.701697	0.627322	0.439602	0.521526	0.676888	474869	435868	659629	400605	406929	556919	806892	595766	663337	449517	461326	538566	576011	592437	522784	624514	231342	377961	660113	671852	551342	1.1837e+06	645710	587812	567151	495412	385016
p2899	275.112	14.9842	C10H17N3O6	Gamma-Glutamylglutamine	8	Peptides	Undefined	1124554	0.735919	1	0.966335	0.994856	1.23079	0.930787	0.847806	0.831507	0.675446	0.884008	0.815156	0.544164	0.518676	0.881095	368133	411416	628888	336735	345806	486859	611942	547672	686291	508552	450182	460499	514892	622178	697913	526415	642487	482208	547668	627920	562506	1.12455e+06	623218	576083	610706	590708	497325
p3024	321.18	14.4291	C15H23N5O3	Phenylalanyl-Arginine	6	Peptides	Undefined	304455	1.00549	1	1.00904	0.70698	1.05518	1.13394	0.786257	0.64854	0.932574	0.928031	0.78875	0.709134	0.809354	0.819252	180058	198603	304455	190202	193979	211069	187743	219818	227205	215631	214141	202874	239074	226436	188538	165286	113354	150424	162310	159059	208605	219689	214806	236125	240814	250638	222117
p3041	248.064	16.6942	C8H12N2O7	L-beta-aspartyl-L-asparticacid	6	Peptides	Undefined	100712	0.435618	1	1.21633	2.05097	0.999147	1.26798	1.94155	0.263594	0.678531	0.546818	0.118142	0.146953	0.395937	1.21381	0	0	23265.3	29435.7	27421.6	30016.9	33337.9	23937.1	49316.1	47320.5	45070.6	37671.8	44761.9	43829.9	52384.5	95616.3	66219.4	72352.7	76898.5	66144.3	26144.8	51099.5	28711.9	35602.5	42213	48308	46377.6
p3262	283.164	16.7079	C12H21N5O3	Lysyl-Histidine	8	Peptides	Undefined	578274	1.1354	1	1.09101	2.60811	1.18708	1.10364	2.66488	0.612991	0.815459	1.17964	0.827233	0.465884	1.54499	0.916026	127943	100838	456711	103388	76863.2	219649	193352	146328	116301	86873.2	175531	202127	196317	141424	116501	393327	190684	404544	500118	500016	159564	404155	94665.6	144617	102154	164636	137951
p3512	297.046	14.9725	C8H15N3O5S2	L-Cysteinylglycinedisulfide	8	Peptides	Undefined	515129	0.672269	1	1.93326	1.80226	0.590639	1.2622	1.5661	0.290918	1.22311	0.601441	0.34111	0.62346	3.12104	1.93436	29849.1	24544.9	38666.3	143613	91455.4	60343.2	41890.7	112768	164031	109058	168123	103939	192254	266112	213178	201415	208021	102743	192121	175369	87984.2	0	54341.7	55568	90392.2	65438.8	104191
p3590	256.117	11.3532	C10H16N4O4	Histidinyl-Threonine	8	Peptides	Undefined	547431	1.69183	1	0.37971	0.49067	1.03746	0.384871	0.468512	1.61951	0.378659	1.00653	1.84316	0.510502	0.648761	0.775374	334949	224684	402154	182512	241535	216695	135701	170662	138461	157614	61488.7	61665.5	64736.4	55293.2	67849.5	102555	57454.8	78886.8	87117	75909.9	184837	244496	184952	111872	123664	55116.3	60893.2
p3645	287.159	13.7565	C11H21N5O4	Arginyl-Hydroxyproline	8	Peptides	Undefined	473754	1.46615	1	0.188845	0.55198	0.652018	0.104748	0.464496	1.85029	0	0	1.42258	0.0625497	0	0.519773	340158	177790	195892	146841	144840	224804	132235	132340	76874.8	119569	0	29878.1	44814.1	21493.8	33328.2	64671.3	94453.1	77101	83699.5	58635.6	152656	55286	117575	65283.2	56368.1	0	33021.9
p3658	289.139	16.8322	C10H19N5O5	Aspartyl-Arginine	8	Peptides	Undefined	240503	1.28177	1	0.597896	0.850971	1.28965	0.690082	0.956563	1.0398	0.510717	1.48204	1.18655	0.54571	0.798252	0.89893	97023.6	99711.7	194040	64090.3	85302.2	89227.2	96712.3	81944.9	71149.7	82390.8	40747.1	49177.9	55140.3	48057.4	58845.5	76166.9	28232	66860.7	88913.9	98447	79123	219890	87851.8	69691.2	86935.2	60349.9	59632.6
p491	230.163	5.13646	C11H22N2O3	Valyl-Leucine	6	Peptides	Undefined	68687764	1.72954	1	0.801309	1.11043	1.33737	0.836414	1.06234	1.50064	1.15866	1.89125	1.45565	1.36065	1.37985	1.11684	3.50424e+07	3.06919e+07	6.86878e+07	2.8452e+07	3.21058e+07	1.96892e+07	2.22589e+07	2.65098e+07	1.84936e+07	2.57834e+07	1.67862e+07	1.78625e+07	1.86655e+07	1.88011e+07	1.82201e+07	2.65074e+07	1.74943e+07	3.26974e+07	2.11411e+07	2.73443e+07	2.33514e+07	5.59545e+07	2.45504e+07	2.1278e+07	2.56336e+07	1.61567e+07	2.13187e+07
p512	294.157	5.15233	C15H22N2O4	Tyrosyl-Leucine	6	Peptides	Undefined	6246617	1.8245	1	0.786706	0.942494	1.18865	0.834421	0.921002	1.36264	1.23812	1.41327	1.40053	1.36568	1.15261	0.998262	2.98703e+06	2.27916e+06	6.24662e+06	2.45298e+06	2.60256e+06	1.74593e+06	1.54967e+06	1.96764e+06	1.52968e+06	2.28811e+06	1.53308e+06	1.34573e+06	1.49576e+06	1.46914e+06	1.3004e+06	1.54777e+06	1.40019e+06	2.49442e+06	1.49704e+06	1.6194e+06	1.61217e+06	3.95986e+06	1.70706e+06	1.64674e+06	1.86831e+06	1.14446e+06	2.00632e+06
p517	248.119	5.15364	C10H20N2O3S	Valyl-Methionine	6	Peptides	Undefined	4667648	1.72722	1	0.941927	1.01874	1.20948	0.870326	0.92024	1.18398	1.14013	1.64129	1.23637	1.10745	1.4504	1.0495	2.04259e+06	1.69063e+06	4.66765e+06	1.66118e+06	2.11944e+06	1.10824e+06	1.09491e+06	1.89524e+06	1.42938e+06	1.52487e+06	1.43652e+06	1.23905e+06	1.50491e+06	1.19973e+06	1.26287e+06	1.20539e+06	1.12751e+06	2.36461e+06	1.26603e+06	1.2213e+06	1.24327e+06	2.93835e+06	1.50945e+06	1.35684e+06	1.48212e+06	1.01118e+06	1.2834e+06
p549	328.142	5.14643	C18H20N2O4	Phenylalanyl-Tyrosine	6	Peptides	Undefined	1536891	1.34842	1	0.945315	0.932027	1.14485	0.946089	1.04159	1.3551	1.23321	1.29359	1.18067	1.28733	1.04419	0.975013	929351	739849	1.53689e+06	1.00103e+06	876993	830851	718830	823092	716276	681381	799527	723925	635772	720743	684277	698688	509911	817469	712828	775249	666736	1.19366e+06	859043	712620	884528	591271	703075
p555	280.142	5.17566	C14H20N2O4	Tyrosyl-Valine	6	Peptides	Undefined	1366299	1.62952	1	0.714531	0.980189	1.18387	0.780058	0.871022	1.28386	1.17054	1.18061	1.3378	1.32476	1.13764	0.792966	823551	732720	1.3663e+06	648765	1.01069e+06	435323	455283	729794	502023	689467	344820	457479	473614	354548	378721	472639	501329	907376	426124	448715	438570	1.18699e+06	592668	485486	625190	324192	421382
p676	321.18	13.0748	C15H23N5O3	Arginyl-Phenylalanine	6	Peptides	Undefined	694969	0.806923	1	1.17387	1.22089	1.33537	1.02933	1.11809	0.922075	0.923047	0.413224	1.07889	0.694221	0.404129	0.919376	160149	362814	314074	365676	347191	372123	219935	411717	397983	518999	574465	244532	548651	375222	511841	433627	390906	506706	525602	488198	508541	567483	615987	279841	593079	321624	395730
p747	186.101	7.71141	C8H14N2O3	Alanyl-Proline	6	Peptides	Undefined	231556	1.91321	1	1.39138	1.55684	1.28951	1.42367	1.58898	1.34275	1.7671	2.52551	1.90047	1.55088	1.82323	1.64078	78868.1	93641.8	231556	57487.3	120921	24713.5	94117.7	45558.4	92113.1	47946.3	78428.8	86298.7	104344	71407.4	83125.1	93157.1	77698.6	118683	110895	73543.2	95096.1	128023	47030.2	38707.7	83734.7	59604.4	104765
p753	286.11	8.84636	C11H18N4O3S	Methionyl-Histidine	6	Peptides	Undefined	342331	1.29656	1	0.983525	1.0101	1.45576	0.972751	0.983938	1.04864	0.957552	1.14565	1.05918	0.956206	1.03721	0.955984	105290	122743	261332	121259	101319	124018	133180	109571	89698.5	92632.4	114179	126020	99035.7	110635	90183.7	86249.9	88328.6	177672	105028	97369.9	113234	342331	106053	120829	116911	84972.8	113756
p992	310.116	13.5968	C14H18N2O6	Gamma-Glutamyltyrosine	6	Peptides	Undefined	477254	0.685054	1	1.21192	0.925715	0.987126	1.20639	0.880599	0.492586	0.821571	0.482562	0.520547	0.620228	0.567719	0.815635	180247	217697	342976	245329	156201	329836	276985	290298	477254	293307	468393	386320	319052	410835	436486	355937	219057	264109	330094	374598	295531	422893	280877	331375	315533	430212	352165
n2371	100.016	7.57542	C4H4O3	2-oxobut-3-enanoate	7	Undefined	3-methylquinoline degradation	1398285	1.20874	1	0.61396	0.749531	0.780546	0.629403	0.881167	0.874225	0.655993	0.496965	0.974434	0.599017	0.658191	0.730887	1.39828e+06	971226	958261	1.04544e+06	891604	797739	927582	715094	990664	924539	504399	552474	416336	514633	686333	549725	608359	571358	831271	703960	666207	562956	603089	893010	674500	476364	524067
p198	100.016	15.3831	C4H4O3	2-oxobut-3-enanoate	5	Undefined	3-methylquinoline degradation	180325	0.459641	1	2.30541	2.79185	0.842324	1.95444	2.77301	0.318744	1.33316	0	0.544781	0.710451	1.25691	1.68332	20741.4	32934.4	0	34812.8	35040.4	64905.9	30874.6	42004	89543.9	41422.5	123238	108116	114490	132291	141445	157082	180325	127713	147552	137640	53029.5	27893.1	40594.8	47543.5	57314.5	90151.4	112239
p2928	155.069	15.5287	C6H9N3O2	3-(Pyrazol-1-yl)-L-alanine	7	Undefined	beta-pyrazole-1-ylalanine biosynthesis	1278008	0.933743	1	1.72169	0.965033	1.24463	1.79118	1.28236	0.954241	1.20457	0.686967	1.07581	1.08703	0.65172	1.08377	649275	564256	681136	499590	540993	682339	697300	638799	582787	542305	1.08327e+06	1.27801e+06	1.01534e+06	1.07605e+06	959505	618121	521175	447832	713978	732507	779750	992538	763780	677671	698778	1.0662e+06	1.0565e+06
p3094	308.158	20.9763	C12H24N2O7	psicoselysine	5	Undefined	fructoselysine and psicoselysine degradation	285214	0.943256	1	1.17636	0.710418	1.04269	1.24477	0.717091	0.682767	0.881383	0.95552	0.792604	0.722562	0.784077	0.846669	125591	124446	285214	151126	124556	170651	181787	194666	154667	157946	220431	238547	170008	204995	177360	131127	104977	116970	138091	119593	152318	197319	162182	204698	179899	222797	215100
n2712	356.132	15.244	C13H24O11	D-galactosylononitol	7	Undefined	galactosylcyclitol biosynthesis	391222	0.771064	1	1.28368	0.829711	1.18483	1.25324	0.708863	0.688653	0.964511	0.916943	0.745581	0.779502	0.731652	0.896923	181604	176185	238337	235988	193825	262126	239365	257081	316743	255235	385536	307195	332658	340197	342415	216941	143153	203965	272281	267632	269346	391222	265030	311595	339276	330221	318997
p3062	161.105	12.0024	C7H15NO3	(S)-Carnitine	5	Undefined	gamma-butyrobetaine degradation __ carnitine degradation II	308361	3.97604	0	29.3239	228.856	3.67895	27.0324	223.127	2.78285	12.1068	10.2474	12.6083	8.71447	26.2912	69.1799	0	0	0	0	19880.2	0	0	0	0	0	23292.6	30309.2	14353.4	43307	35357.5	199344	241116	308361	182381	213077	0	0	18394.7	0	0	20716.1	28741.2
p472	115.1	28.247	C6H13NO	Trimethylaminoacetone	5	Undefined	gamma-butyrobetaine degradation __ carnitine degradation II	790235	0.945808	1	0.779677	0.555833	0.832172	0.841535	0.694976	1.24398	0.918825	0.998103	1.19911	1.12359	0.836517	0.742054	330090	384902	318293	420332	296700	304625	479129	487760	294897	284193	266133	341598	205853	321193	308096	196428	222459	180993	199677	229070	384420	176779	274035	379015	325773	387465	238444
p356	122.048	14.0642	C6H6N2O	Picolinamide	5	Undefined	Glycerophosphoinositols	719994	0.876656	1	3.05741	3.70293	0.827433	2.19923	3.71938	0.695038	1.61078	0.751319	0.816187	1.18297	1.21679	1.69823	98937.1	84399.7	130381	155877	131492	113068	102742	133949	203064	132836	414328	379415	301306	534451	466840	410251	592797	495497	472047	568356	112591	56613.7	115284	157956	124891	275992	291980
p2237	274.132	5.08845	C15H18N2O3	indole-3-acetyl-valine	5	Undefined	IAA degradation V	897735	0.96646	1	1.33293	1.01423	1.4061	1.15241	0.94634	0.957256	1.13851	1.68554	1.1844	1.17168	1.48483	1.01398	320309	364820	653765	289215	316515	404673	441840	417013	403884	344700	575414	497578	512267	540287	556465	496475	271224	523879	374999	374156	556154	897735	523454	439415	412463	510434	470302
p72	241.277	7.58227	C16H35N	Hexadeceylamin	5	Undefined	Intstd	71635960	0.416424	1	0.449513	0.188374	0.618367	0.25985	0.0840609	0.675474	0.453586	0.610237	2.23626	0.763466	0.989802	0.326686	6.33702e+06	5.19822e+06	4.13556e+06	4.34187e+06	8.79651e+06	2.08754e+07	6.95462e+06	1.20098e+07	9.81881e+06	1.95238e+07	9.57818e+06	3.90288e+06	5.81171e+06	5.67274e+06	6.13287e+06	3.83145e+06	1.65448e+06	1.82592e+06	2.49566e+06	3.22464e+06	1.0921e+07	3.14401e+06	9.65751e+06	9.51908e+06	9.53851e+06	4.05451e+06	3.05869e+06
p2975	147.09	12.2475	C6H13NO3	N-hydroxyisoleucine	5	Undefined	lotaustralin biosynthesis __ superpathway of linamarin and lotaustralin biosynthesis	213739	0.952538	1	1.52619	1.34557	1.01024	1.39712	1.26789	0.841279	1.12305	1.25517	0.893887	1.06607	1.05859	1.13209	64893.5	105073	146214	91576.5	90689	100787	85290.4	105421	120918	110866	129578	142121	159595	187281	180053	158050	108461	122823	151889	162889	86431.5	159155	90560.8	92016.1	100475	129909	156855
p2694	96.0213	16.086	C5H4O2	Furfural	5	Undefined	methanofuran biosynthesis	121021	0.758772	1	3.205	3.60347	0.739399	2.47541	3.40408	0.310305	1.06036	0	0.567002	0.654336	0.975392	1.6821	26677.8	14641.2	18688.6	19547.5	17968	25382.1	17665.3	25342.6	38384	21753.6	76867.3	83071.9	69170	108173	74648.1	80776.4	101793	101589	85611	93375.7	18984.3	14881.9	19178	19349.3	22639.7	49990.4	64389.6
n2707	141.985	12.0943	C2H7O3PS	dimethylthiophosphate	5	Undefined	methyl parathion degradation	281953	1.27725	1	0.716636	0.580416	0.928999	0.735294	0.579503	1.47018	1.07133	1.30797	1.30818	1.32319	1.00945	0.750653	231035	207438	177301	188540	186547	167125	151257	171732	127090	158570	119264	115202	111310	103242	106929	79606	98397.4	89759	87079.1	95430.3	167336	81255.7	181916	144282	145904	107639	118465
n3071	141.985	6.34098	C2H7O3PS	dimethylthiophosphate	7	Undefined	methyl parathion degradation	259700	1.22049	1	0.745837	0.701254	0.901363	0.798582	0.705244	1.31738	0.968137	1.01303	1.18566	1.27731	0.725236	0.809059	215764	187915	214810	169005	175775	151025	131929	178758	144496	183042	113626	114802	128881	105253	126091	101255	120741	91695.7	116671	123103	163457	81122.9	180527	133203	153092	117331	129280
n3117	141.985	14.543	C2H7O3PS	dimethylthiophosphate	7	Undefined	methyl parathion degradation	244330	1.27643	1	0.496803	0.319582	0.936473	0.560317	0.361259	1.54384	0.978169	1.31321	1.32173	1.27579	0.856086	0.563273	193787	183451	160996	146255	165668	138587	138825	156821	101086	130725	71490.6	72009.5	78069.5	48074.9	61248.6	38632.6	46013.4	40115.7	44321.9	43771.7	148663	72942.3	166645	114911	120571	72594.7	80757.6
p3065	244.179	7.51195	C12H24N2O3	N-(6-Aminohexanoyl)-6-aminohexanoate	7	Undefined	nylon-6 oligomer degradation	1664901	0.907224	1	1.1121	0.850144	1.37017	1.41832	0.806467	0.615621	0.723017	1.81462	0.708308	0.564081	0.899902	1.96763	343692	176471	644923	262423	241841	584463	289332	355947	376759	233563	563708	259459	247971	436623	538580	454985	262301	382649	204478	259906	307117	566777	376791	556335	714180	658056	304716
n60	904.28	15.9237	C42H51N6NiO13	coenzyme F430	5	Undefined	Porphyrin and chlorophyll metabolism	361789	0	0	332.507	290.747	0	298.17	299.428	0	99.323	0	0	15.4654	47.4414	164.051	0	0	0	0	0	0	0	0	0	0	301950	314478	333289	351026	361789	331100	292914	266922	303358	259443	0	0	0	0	0	284970	293368
p332	220.085	10.8001	C11H12N2O3	5-Hydroxytryptophan	5	Undefined	serotonin and melatonin biosynthesis	272794	0.798372	1	1.59772	1.48568	1.04088	1.5517	1.44625	0.797994	1.15042	0.960693	0.8466	1.0454	1.07659	1.18596	68310.1	98760.1	140037	102723	96623.5	120478	121816	126260	129085	136720	210674	227397	143577	204925	226957	170419	197764	162449	183898	227922	117026	177202	121483	119085	125496	226755	176879
p3323	143.095	11.581	C7H13NO2	Stachydrine	5	Undefined	stachydrine degradation	148472	1.23136	1	1.37835	1.58706	1.12054	1.39429	1.38863	0.856206	1.21016	1.53874	1.12655	1.26389	1.37816	1.2026	71250.9	82219.2	104297	84135	81799.1	68327	65933.7	82459	73357.6	54014.6	80943.6	71202.8	92169.1	123270	106695	100564	134590	119331	93821.3	97787.5	46606.3	109162	79009.9	83878.4	66914.1	97640.4	82771.9
n2810	113.945	20.9738	H2O3S2	H2S2O3	7	Undefined	sulfur disproportionation II (aerobic) __ superpathway of sulfur oxidation (Acidianus ambivalens) __ superpathway of tetrathionate reduction (Salmonella typhimurium) __ tetrathionate reduction I (to thiosulfate) __ sulfate reduction IV (dissimilatory)	346396	1.13898	1	1.31795	0.492263	1.40902	1.13797	0.500813	1.05488	1.44278	1.37983	1.48185	1.63255	0.90387	1.0662	138802	150886	188268	131864	146043	149678	129498	141667	90561.5	152228	346396	130748	137727	127911	131857	59251.2	47941.6	102186	45935.7	71368.1	229231	238544	154555	137190	175552	264688	167142
n1000	490.278	5.01407	C24H42O10	9-Hydroxy-10-O-D-glucuronoside-12Z-octadecenoate	5	Undefined	Undefined	697096	1.30764	1	0.859539	0.976447	1.62804	0.876322	0.959324	1.29511	0.971348	1.40957	1.27315	1.02799	1.06325	0.862376	243544	172536	343194	200098	205355	161700	203969	209393	149583	166063	170261	177066	155360	130817	132095	140784	127043	269849	142489	189565	168089	697096	184312	178737	221874	130756	176254
n1014	301.095	4.92575	C16H15NO5	Citpressine I	5	Undefined	Undefined	211640	0.687401	1	1.11037	0.990041	1.45026	1.12869	0.993868	0.728726	1.00207	1.22741	1.11631	0.877805	1.19495	0.886778	63115	32785.8	66429.7	34424.4	67650.4	66901.9	77288.7	75258.7	95900.8	69294.9	72058.4	89100.5	87055.6	87343.9	91541.5	86207.2	43097.9	90523.7	74463.2	86522.4	71401.8	211640	84393.9	84655.4	105745	97290.7	84335.5
n1036	763.207	17.5975	C35H39O19	Glucuronosyletoposide	5	Undefined	Undefined	144012	0	0	12.4194	130.368	0	10.7399	128.853	0	1.05516	0	0	0	5.94755	50.6165	0	0	0	0	0	0	0	0	0	0	8131.01	11917	11567	14438.1	16044.1	130460	136479	140621	120233	124048	0	0	0	0	0	12161.5	10014
n1092	237.064	5.16557	C11H11NO5	Methyl 2,3-dihydro-3,5-dihydroxy-2-oxo-3-indoleacetic acid	5	Undefined	Undefined	142423	1.02666	1	1.63086	1.96534	1.27176	1.89827	1.9808	0.49422	1.50436	1.29094	0.680846	1.29918	1.44529	0.753582	0	57966.6	91191.6	34065.6	91035.3	66864.7	36766.8	43858.6	86380.3	33268.1	55080.9	90446.2	81988.5	125183	82966.4	139687	57986.4	108721	104286	114337	35259	128869	64932	66838.8	43836.7	111131	64652.7
n1098	214.095	7.90671	C9H14N2O4	Pyrimidine nucleoside	5	Undefined	Undefined	431548	0.898066	1	1.41371	1.43017	1.24042	1.45037	1.44907	0.835314	1.05852	1.05316	0.92734	0.925669	1.08701	1.39665	51511.4	51738.9	61179	65508.6	60033.3	64897.2	68041.6	57835.8	74135	57974.5	108264	84848.9	89495.1	86291	87565.8	98075.2	74793.4	98063.7	96387.2	94458	62966.3	137186	64575	68710	67074.9	91170.6	89034.5
n1252	414.204	4.23814	C24H30O6	Magnoshinin	5	Undefined	Undefined	7295540	1.59592	1	0.663611	0.553712	0.666312	0.572268	0.562342	0.983054	0.728935	1.40062	0.75979	0.786647	1.28736	0.636765	6.61853e+06	2.74213e+06	7.29554e+06	2.72439e+06	2.73354e+06	3.20901e+06	3.82487e+06	2.88725e+06	1.98986e+06	1.9457e+06	2.36132e+06	1.8992e+06	2.24505e+06	1.12011e+06	1.56977e+06	1.35064e+06	1.52943e+06	1.36278e+06	2.07493e+06	1.35483e+06	1.61189e+06	1.95168e+06	2.00577e+06	1.78226e+06	1.88128e+06	2.09201e+06	1.57612e+06
n1262	294.183	4.09365	C17H26O4	Phytuberin	5	Undefined	Undefined	1997895	1.22184	1	0.82082	0.615292	1.07777	0.832822	0.641869	1.07651	0.785576	1.30619	1.18752	1.06898	1.30414	0.804318	947593	920857	688459	911201	896785	738049	800414	751730	568548	713651	690412	602038	726109	510421	403309	404386	531716	526332	396311	339319	571050	640794	953553	977644	707161	711615	751425
n1265	234.162	4.23142	C15H22O2	Bakkenolide A	5	Undefined	Undefined	1836931	1.26021	1	0.515229	0.444445	0.649083	0.528447	0.468789	0.954557	0.619129	0.894723	0.630316	0.614866	1.02397	0.510365	1.83693e+06	781458	997321	952114	749894	1.07432e+06	1.28093e+06	800976	563932	499558	448992	381684	647975	277615	417856	271389	518938	401872	401153	282082	466921	605483	531213	577670	557662	507192	565521
n1272	146.058	4.26478	C6H10O4	Dimethyl succinate	5	Undefined	Undefined	779684	1.69363	1	0.678786	0.595569	0.754932	0.615081	0.669346	1.04724	0.860607	1.84058	0.87032	0.913943	1.64197	0.627466	538601	385293	686089	221116	212024	338328	259221	137636	348534	122635	228234	176998	145634	118675	149315	149024	136524	150030	166178	116711	177188	227858	234455	158378	112836	186777	169912
n1278	496.049	14.7891	C20H16O15	3,5-Di-O-galloyl-1,4-galactarolactone	5	Undefined	Undefined	916661	0.385996	1	2.87738	1.32739	0.588256	1.41566	1.27704	0.211344	0.419791	0.00816948	0.292405	0.136831	0.288151	0.715347	51983.2	57131	40276.1	140587	62517.3	174439	99878.9	94197.8	392815	151879	343936	423318	336107	916661	607632	302714	236746	299573	227482	145672	135244	108083	78502.3	117474	97897.5	190047	276463
n1398	228.111	7.58135	C10H16N2O4	(S)-ATPA	5	Undefined	Undefined	6937684	0.773593	1	1.3657	1.02113	1.23389	1.32373	0.937537	0.692101	0.943421	0.873842	0.740344	0.787	0.701994	1.0771	2.32593e+06	2.6433e+06	3.08289e+06	2.97671e+06	2.38176e+06	2.94033e+06	3.13857e+06	3.43508e+06	4.38358e+06	3.43789e+06	5.21487e+06	4.26567e+06	4.07803e+06	5.09193e+06	5.02458e+06	3.85468e+06	2.14118e+06	2.91372e+06	4.49969e+06	4.29253e+06	3.84725e+06	5.66199e+06	3.53608e+06	4.32344e+06	4.0213e+06	4.59307e+06	4.35384e+06
n1400	260.083	7.57768	C10H16N2O4S	d-biotin d-sulfoxide	5	Undefined	Undefined	2523077	0.732608	1	1.43099	1.03716	1.27618	1.43124	1.00985	0.650971	0.982627	1.00441	0.771483	0.760458	0.888963	0.99594	754421	818101	1.06433e+06	978164	837257	1.19476e+06	1.2462e+06	1.12436e+06	1.40954e+06	1.10243e+06	1.98912e+06	1.58088e+06	1.57727e+06	1.91206e+06	1.63723e+06	1.3712e+06	734729	1.0801e+06	1.48229e+06	1.63483e+06	1.28487e+06	2.52308e+06	1.19829e+06	1.4172e+06	1.33227e+06	1.92679e+06	1.53859e+06
n1409	173.105	7.5685	C8H15NO3	N-Acetyl-L-leucine	5	Undefined	Undefined	568361	0.514822	1	1.16945	0.914829	0.804961	1.20946	0.869051	0.399521	0.507979	0.376423	0.342312	0.341686	0.424874	0.985543	153402	69384.2	149337	189970	61002.5	198182	273331	119821	437614	181366	245216	415620	234887	299152	220523	270390	242329	151025	212886	230600	195032	211565	141470	218337	207852	331178	282766
n1414	189.1	7.57614	C8H15NO4	2 -(Butylamido)-4-hydroxybutanoic acid	5	Undefined	Undefined	419687	0.791014	1	1.91629	1.08994	1.26756	1.68556	1.0062	0.609018	0.923838	0.376793	0.831013	0.665354	0.723931	1.16709	118614	179474	60912.1	182215	176097	167106	180392	130707	269171	159450	274312	326452	345569	417431	373974	203557	134538	150515	198239	301538	265931	239326	174086	259541	210572	320750	311406
n148	266.155	3.81899	C12H26O4S	sodium dodecyl sulfate	7	Undefined	Undefined	96360094	1.15343	1	0.761672	0.630954	0.956395	0.780318	0.63348	1.35964	1.00196	1.33166	1.20552	1.17103	1.22919	0.898257	5.85627e+07	6.30587e+07	6.62197e+07	5.00825e+07	5.91057e+07	5.18234e+07	5.44238e+07	5.3036e+07	4.81319e+07	5.01033e+07	3.96014e+07	4.01021e+07	4.15025e+07	3.90308e+07	3.59076e+07	3.38541e+07	3.1725e+07	3.015e+07	3.30244e+07	3.37287e+07	5.36568e+07	3.64542e+07	5.32158e+07	5.27871e+07	5.01754e+07	3.87821e+07	3.94518e+07
n149	326.192	3.80647	C18H30O3S	2-Dodecylbenzenesulfonic acid	5	Undefined	Undefined	18418636	1.68974	1	0.764865	0.707293	0.996116	0.809154	0.78406	1.31643	0.929984	2.01518	1.26206	1.1255	1.75421	0.947581	1.29421e+07	1.03082e+07	1.32023e+07	8.95614e+06	9.20116e+06	6.1031e+06	7.69989e+06	5.8567e+06	6.22783e+06	6.43105e+06	5.28852e+06	5.60724e+06	4.97122e+06	4.69344e+06	4.15891e+06	4.62803e+06	7.27532e+06	4.00929e+06	3.30065e+06	3.6454e+06	5.87154e+06	5.39521e+06	6.59943e+06	7.44471e+06	6.88215e+06	5.15472e+06	5.0731e+06
n1491	324.105	14.5178	C10H28Cl2N2OP2	Polixetonium chloride	5	Undefined	Undefined	578647	0.85901	1	1.2912	0.687887	1.11583	1.34023	0.760654	0.726572	1.14446	0.508631	0.921939	0.963767	0.534809	0.955171	285581	287864	386661	322202	325742	363230	424294	366155	401279	317021	458235	491942	472275	492514	502137	262441	237406	189510	293755	304598	372999	479547	353212	459853	423198	458768	578647
n1664	259.046	15.2324	C6H14NO8P	glycerophosphoserine	5	Undefined	Undefined	457253	0.340162	1	0.729328	20.9362	0.829633	0.698045	17.8519	0.552118	0.751293	0.272378	0.711748	0.670404	0.195293	4.77727	6709.42	13001	4843.84	5940.5	0	15190.9	16914.9	19883.7	16057.8	21600.4	10988.5	13122.4	14828.8	13596.9	12846.1	327718	457253	404838	339485	347585	14708	15961.4	15346	16578	11781.3	11503.2	13695.5
n171	265.081	10.2032	C10H11N5O4	5'-Dehydroadenosine	5	Undefined	Undefined	1114651	1.33832	1	2.8535	6.75146	1.47914	2.76913	6.15383	0.533746	1.15149	0.742379	0.888356	0.598235	0.626814	2.20342	128405	137743	236654	171100	160338	111790	175028	131020	139819	65691.9	154874	399898	316443	534211	373303	1.06752e+06	788295	962543	690672	699491	116087	499372	92237.3	114757	99565.5	234652	410481
n1723	237.085	12.8442	C8H15NO7	N-Acetyl-D-glucosaminate	5	Undefined	Undefined	127042	0.672554	1	2.51515	5.41577	1.71835	2.34508	5.40285	0.607837	1.83163	2.10194	0.859421	1.09648	2.09771	2.20706	12984.1	13351.3	13632.1	11916.6	13645.3	14890.9	14662.4	14848.2	23743.4	29288.9	66586.9	37709.2	45141.8	46467.9	49154.5	100473	110018	123992	95688.2	97508.8	29345	61515.8	15793.6	30436.5	30334.4	42533.7	43477.9
n1725	191.062	7.57629	C7H13NO3S	N-Acetylmethionine	7	Undefined	Undefined	3693020	0.504372	1	4.6477	10.129	0.908875	3.46934	9.14351	0.469974	1.42299	0.636757	0.638162	0.819909	1.76711	3.28828	159021	86777.5	70296.2	190617	194613	271964	237111	218569	402467	260379	1.09698e+06	1.4438e+06	1.22546e+06	1.55861e+06	1.13773e+06	2.62398e+06	3.69302e+06	2.55236e+06	2.45037e+06	2.76451e+06	265592	232712	187713	319872	257892	968945	1.18789e+06
n1767	501.664	7.6212	C37H64N7O17P3S	Palmitelaidoyl-CoA	5	Undefined	Undefined	684142	0.793936	1	2.78655	0.413307	0.630768	2.08212	0.23281	0.542586	0.986178	0.0292978	0.389257	0.420568	0.540691	0.958371	179138	89827	83390.7	180906	160368	162940	104070	133988	220497	252165	346209	492554	483683	684142	427909	99782.6	19825	51088.9	97144.6	93248.4	91591.5	61792.4	128668	116200	152824	312703	416305
n1809	212.009	13.422	C5H9O7P	P-DPD	5	Undefined	Undefined	251943	1.24245	1	1.31036	4.67126	1.04171	1.0964	4.9412	0.590859	0.973391	0.962092	0.949577	0.779159	2.78252	1.78733	52184.6	27215.7	34419.9	39740	33471.7	32058.3	22886.4	20161	38510.7	36918.1	42725.1	38204.3	29343	47440.1	39542.4	161880	120037	152346	147052	121871	32991.5	21723.8	29688.1	33855.5	38553.8	28945.3	32759.6
n1819	228.147	8.89928	C11H20N2O3	L-isoleucyl-L-proline	5	Undefined	Undefined	376562	0.762799	1	1.25281	1.04591	1.22526	1.19704	1.00538	0.677011	0.899478	0.936995	0.745308	0.743295	0.854043	0.838821	125668	149218	171865	178101	164960	212045	189118	181196	266342	186712	271750	246463	250627	256854	271484	245253	155298	203182	230923	248295	197420	376562	195025	246116	253529	252381	230513
n1878	116.084	5.12989	C6H12O2	4-Hydroxyhexan-3-one	7	Undefined	Undefined	5108231	1.3872	1	0.365721	0.229373	0.387238	0.247154	0.213818	1.09436	0.336393	0.390585	0.405232	0.275484	0.405548	0.732749	5.10823e+06	3.80595e+06	4.02385e+06	4.39233e+06	3.02398e+06	3.29618e+06	3.93606e+06	3.50973e+06	1.88382e+06	2.04721e+06	2.33964e+06	851201	844387	662565	668431	713035	691509	640256	733268	587527	1.11028e+06	1.15441e+06	1.20419e+06	1.07084e+06	1.14223e+06	1.00708e+06	666494
n1910	982.726	3.61105	C63H98O8	Thermozeaxanthin-17	5	Undefined	Undefined	2035189	0.814724	1	0.203612	0.00757996	1.40961	0.287211	0.0231889	1.10289	0.198002	0.702543	1.3915	0.325658	0.560498	0.434534	767683	1.14582e+06	92598.5	1.0517e+06	1.33987e+06	1.20144e+06	1.29041e+06	1.09404e+06	929557	882294	198443	269671	201985	243927	185020	40914.7	0	0	0	0	1.34205e+06	1.46655e+06	1.44817e+06	1.68113e+06	1.6708e+06	252196	322138
n1951	158.058	10.3261	C7H10O4	(1S,4S)-4-Hydroxy-3-oxocyclohexane-1-carboxylate	5	Undefined	Undefined	181336	1.26162	1	1.00582	6.38596	1.28296	1.03791	6.3613	1.34162	1.32024	1.59562	1.25385	1.36987	6.14069	2.28393	18563.2	21845.9	20868.3	20616.8	23442.7	17641.8	17736.7	19780.9	12411.5	15922.6	20342.7	14216.8	13853.7	17905.7	17660.4	166566	133753	91371.2	73082.4	68413.6	20521.8	30590.4	19316.1	19109.6	17580.5	15750.2	16093.9
n1961	296.094	15.728	C12H16N4O3S	5'-methylthiotubercidin	5	Undefined	Undefined	418832	0	0	0	367.374	0	0	362.094	0	0	1.83565	0	0	100.055	140.85	0	0	0	0	0	0	0	0	0	0	0	0	0	0	0	337085	418832	361879	347405	371669	0	0	0	0	0	0	0
n2004	228.209	7.50133	C14H28O2	2-6-10-Trimethylundecanoicacid	7	Undefined	Undefined	3751514	1.13028	1	0.770723	0.696384	0.929772	0.786888	0.683486	1.23978	1.02594	1.14521	1.13228	1.18777	0.886011	0.854565	2.80683e+06	2.75338e+06	2.6984e+06	2.62335e+06	2.92389e+06	2.38416e+06	2.38124e+06	2.63357e+06	2.16562e+06	2.64995e+06	1.88406e+06	1.83279e+06	2.06694e+06	1.68425e+06	1.94598e+06	1.59398e+06	1.7443e+06	1.59903e+06	1.76214e+06	1.80656e+06	2.42062e+06	1.63148e+06	2.68717e+06	2.27821e+06	2.33926e+06	1.78989e+06	1.9511e+06
n2010	294.183	7.48297	C17H26O4	Embelin	5	Undefined	Undefined	773187	1.13073	1	0.785939	0.669818	0.918638	0.800435	0.642318	1.26849	1.0059	1.12378	1.14787	1.16297	0.836601	0.866863	620487	602279	536133	576886	607514	510452	491865	610225	445579	544890	434474	397324	457130	353902	402976	324377	368390	328088	356870	365819	507398	338480	576263	489214	479870	405217	413986
n2011	113.993	7.53654	C2HF3O2	Trifluoroacetic acid	5	Undefined	Undefined	656793	1.11049	1	0.794759	0.704729	0.976662	0.804118	0.691123	1.28588	1.06129	1.12286	1.17855	1.21364	0.93316	0.812151	410075	477362	397410	362519	482317	398251	337201	413734	352835	415758	359378	278055	326433	264964	295340	260463	265490	243316	261557	320688	424965	243857	434689	387409	382101	314529	315635
n2016	194.058	7.52526	C10H10O4	Scytalone	5	Undefined	Undefined	427239	1.19111	1	0.78245	0.654367	0.983586	0.832862	0.602412	1.21406	1.0112	1.14198	1.19126	1.16861	0.731703	1.08101	215543	201402	210052	200734	230893	139076	164826	229387	159096	196389	141955	122015	159165	122446	149840	95744	112475	114821	118647	139897	180190	112497	260249	155242	166008	142494	128661
n2017	222.089	7.51805	C12H14O4	Apiole	5	Undefined	Undefined	388284	1.13959	1	0.763113	0.638881	0.937866	0.797742	0.663592	1.25615	1.04565	1.17013	1.1635	1.13491	0.832716	0.772479	272976	301565	253626	259975	271297	268535	231421	252852	196269	243843	193256	169562	208145	149126	190243	139687	154664	145306	159923	162553	214292	152165	282738	228527	241077	190289	182084
n2024	278.191	7.47654	C20H24N	2-ethyl-1,5-dimethyl-3,3-diphenylpyrrolinium (EDDP)	5	Undefined	Undefined	157827	1.1038	1	0.784246	0.673784	0.921394	0.805904	0.661941	1.27312	1.04181	1.23535	1.30652	1.27346	0.924377	0.879544	112184	101187	97121.5	95934.6	100726	88309.8	93070.3	101009	83085.8	93986.7	73413.4	74044.7	77860	67621.6	67391.1	54258.6	61769.7	58828.1	63011.8	71709.4	99103.9	60615.8	94955.2	83183.7	85486	74191.5	77946.5
n2048	244.07	11.9506	C9H12N2O6	Orotidine(fragment)	5	Undefined	Undefined	222320	0.900167	1	4.08527	8.77356	0.92415	3.45032	8.07963	0.581567	1.48832	1.01828	0.750088	0.835267	1.8609	3.00018	19425.9	19477.2	16823.7	21322.7	20900.8	26251.4	17769.4	16796.5	28084.9	19911.4	86435.3	86964.9	73023.6	109393	88715.7	175421	222320	216736	173970	166235	22744	16784.2	15786.1	21087.9	24157.8	82867.7	72454.1
n2140	120.042	10.5686	C4H8O4	D-Erythrulose	5	Undefined	Undefined	122098	1.14901	1	1.90081	3.45251	1.2574	1.75265	2.94676	1.01215	1.40851	1.38865	1.16454	1.27646	1.47059	1.67714	31693.4	30706	38065.1	29440.4	37418.5	25481.4	29875.4	30409.4	34250.4	25607.3	39733.6	55291.4	53816.8	68157.7	59803.8	91247.1	118581	122098	82384.9	88457.2	25302.7	55089.2	32076.5	37212.4	33426.5	45859.1	50415
n2158	150.016	17.486	C4H6O6	(S,S)-Tartaric acid	5	Undefined	Undefined	419630	1.11936	1	0.71757	0.642236	0.931857	0.727376	0.669073	1.22685	1.0494	1.21326	1.14899	1.203	0.980287	0.760512	340326	342892	338358	304315	343065	305752	291198	298232	271669	324146	211858	209798	241219	204717	202302	172271	210237	174119	192020	208925	297545	214099	306461	278452	292838	221846	221276
n2252	181.041	11.8168	C5H11NO4S	DL-Methionine sulfone	7	Undefined	Undefined	2056587	1.00829	1	0.854615	0.795348	0.833332	0.791614	0.678847	1.08196	0.949952	1.08298	1.26011	1.19624	0.760668	19.604	17480	7657.91	14541.9	12361.5	13286	11809.5	10936.7	17187.5	11645.8	13210.6	12278	11313.5	10225.8	9237.13	12316.2	10450.6	11005.4	11379.1	9258.55	9437.08	6818.04	8693.68	13962	11926	12592	10614.2	10477.5
n2259	589.663	16.7024	C40H63N9O28P2	UDP-N-acetylmuramoyl-L-Ala-D-gamma-Glu-6-carboxy-L-Lys-(D-Ala)2	5	Undefined	Undefined	380538	0.83327	1	3.55149	10.1489	0.608457	3.10495	9.50919	0.865968	3.40492	1.20123	1.16932	2.24129	5.66381	5.29765	14107.4	26316.7	12708.4	24989.9	15642.9	18162.2	13132.5	21477.6	38679.8	21074.8	59333.2	76917.2	65696.8	110899	86792.3	199812	278611	206593	214026	242983	17752.2	10542.8	12524.1	15562.1	12086.6	58277.8	78102.4
n2333	235.069	14.5876	C8H13NO7	N-Acetylgalactosaminate	5	Undefined	Undefined	148928	0	0	18.6242	83.7681	0	13.5044	73.8143	0	0	0	0	0	51.2461	21.858	0	0	0	0	0	0	0	0	0	0	15617	15604.1	13794.8	29711.7	18393.6	105539	112048	83809.3	57179	60265.8	0	0	0	0	0	8093.69	15137.5
n2354	337.095	14.3733	C19H15NO5	Atheroline	5	Undefined	Undefined	162956	0	0	20.1171	132.631	0	19.7403	132.744	0	0	0	0	0	12.6057	32.2994	0	0	0	0	0	0	0	0	0	0	11678.5	18466.1	18042.5	27647.2	24751.1	134383	155414	134761	134327	104270	0	0	0	0	0	17865.3	19320.7
n2356	220.058	14.2416	C8H12O7	dihomocitrate	5	Undefined	Undefined	105907	0	0	23.7638	90.8652	0	19.3318	85.6977	0	0	0	0	0	11.4008	26.4361	0	0	0	0	0	0	0	0	0	0	18582.3	26119.4	19324.3	31282.7	23510.3	94674.8	104605	97200.2	80876	76969.9	0	0	0	0	0	25603.9	17674.4
n2406	328.052	9.87622	C16H12N2O4S	(5E)-6-Oxo-5-(phenylhydrazono)-5,6-dihydro-2-naphthalenesulfonic acid	5	Undefined	Undefined	243505	1.06615	1	0.911759	0.775909	0.944119	0.92543	0.753705	0.957835	1.04742	1.07558	0.980237	1.00663	0.975334	0.814701	227562	216543	185383	221812	234221	218328	204652	194783	208664	191746	214394	177029	178152	164098	194656	148599	164468	137391	166512	173040	201493	127804	196685	211198	224096	194531	171851
n2427	222.074	12.7368	C8H14O7	6-Acetyl-D-glucose	5	Undefined	Undefined	165760	2.44926	1	4.23483	18.3432	1.89366	3.69265	22.0711	0	0.477705	0	0.528311	0	4.31377	5.70404	32033	0	0	14341.4	15138.9	12815.3	0	0	12299.7	0	27625.3	23476.9	13196.4	27868	14191.4	134175	83341	96760	75174	71240.5	12480.9	10063.9	14138.9	10875.7	0	20464.5	23556
n2515	191.062	6.45775	C7H13NO3S	N-Acetylmethionine	7	Undefined	Undefined	806848	0.198238	1	4.1554	8.58945	1.00927	3.46187	8.69877	0.41521	1.55263	1.03588	0.625577	0.659109	2.96851	5.88356	0	0	0	7080.43	7239.85	16968.1	12162.9	6929.98	21829.8	14347.1	67309.6	52843	53547.9	76132.5	50344.4	121886	168954	127939	90767.7	110938	16431.5	15239.8	5699.17	18250.6	17286.1	52646.1	60903.5
n2543	302.159	9.98193	C12H22N4O5	Neuromedin B (1-3)	5	Undefined	Undefined	136889	1.2695	1	0.98892	1.47128	1.41768	1.00245	1.5126	1.24707	0.762117	1.13886	1.11099	0.798491	0.877543	1.04126	59285.5	48857.6	81970.2	37833.3	42977.7	33199.7	55784.4	46100.3	38886.6	39440.1	33306.5	45086.8	43808	41115.3	47729.9	65069.1	34680.2	56838	79602.8	77796.6	44349.9	136889	36830.9	43036.7	41442	48817.8	42046.3
n2580	358.111	15.3402	C12H22O12	melibionate	5	Undefined	Undefined	400413	0.680508	1	0.813906	0.864844	1.31178	0.890111	0.956871	0.873119	0.693152	1.54646	1.07221	0.824625	0.771942	0.933732	120869	137092	146247	114849	91823.3	147234	152634	158136	237190	202490	150978	128813	126449	162563	161827	162648	118044	150465	175515	169684	213502	346283	217099	184020	216657	150950	154314
n2624	247.969	12.3893	C8H9BrO4	4-bromoisophthalate	5	Undefined	Undefined	165894	0.283833	1	1.88048	2.04202	1.05453	1.91882	1.93516	1.02566	2.66285	1.10191	1.83764	2.02976	1.43736	1.41905	0	16843.3	0	27681.9	16537.4	46195	43321.9	48699.6	41253.2	35665.8	89998.2	63561	78938.3	85875.9	86184	92186.1	101470	90453.2	78400.9	76800.5	62610.9	20884.8	57560.6	41846.4	43964.2	93638.2	95637.2
n2637	229.168	5.08093	C12H23NO3	N-Decanoylglycine	5	Undefined	Undefined	174906	1.15275	1	0.708433	0.95792	1.03146	0.677072	0.58854	1.30441	1.01424	1.11998	0.941978	1.00674	1.22996	0.829506	92257.3	93619.7	79509.5	114694	94359.1	85410.4	70114.7	75292.3	92620.7	88133.5	60565.5	63876.3	67197.1	54642.3	45289.7	174906	61190.9	46726	63678.5	47750.7	81704.6	53568.9	108290	108567	72388.4	47590.2	53330.9
n2678	307.09	10.2748	C11H17NO9	4-oxo-N-acetylneuraminate	7	Undefined	Undefined	473870	4.04545	1	46.5967	32.6819	3.36949	53.8967	36.2442	1.73449	12.3455	6.46665	3.5546	6.97324	10.4827	18.1514	19584.4	10606.7	55085.2	17248	17164.9	0	8003.18	6770.07	7386.26	7426.6	177389	268476	220020	366119	346611	342234	87804.6	177850	168643	190399	0	56187	16567.7	9200.28	17735.2	287695	228408
n27	372.287	4.16278	C21H40O5	1,2-dioctanoyl-3-methyl-1,2,3-butanetriol	5	Undefined	Undefined	2500697	1.08901	1	0.775364	0.726139	0.971688	0.76895	0.735333	1.40685	0.916279	1.5925	1.2539	1.15551	1.67399	0.762548	1.30275e+06	1.17136e+06	702074	1.02569e+06	1.08464e+06	1.39819e+06	1.05879e+06	904988	752101	740362	828023	853252	818069	642926	621687	807052	886042	601047	626878	603978	928708	766289	1.23467e+06	1.05434e+06	732998	809912	780898
n2718	150.068	7.33194	C9H10O2	Tolylacetate	7	Undefined	Undefined	620724	4.12135	1	0.405964	0.47514	0.549177	0.327264	0.366481	1.22496	0.441632	2.38828	0.614782	0.459918	0.322727	5.0555	477459	91943.3	546414	45462.7	61074.8	85806.5	68778.6	24557.9	73156.9	44290.7	34954.4	23115.1	21998.9	21019.3	19317.4	19363.3	18271.5	27000.9	64408.3	11877.9	43231.3	18141.1	29027.1	19194	53287.3	16334.6	31684.3
n2767	422.083	16.7799	C12H23O14P	6-Phospho-beta-D-glucosyl-(1,4)-D-glucose	7	Undefined	Undefined	334713	1.03514	1	0.395699	1.05212	0.651427	0.349107	0.830262	0.410886	0.127489	0.188967	0.340185	0.087567	0.0909928	0.458526	95838.5	92444.6	83762.1	315949	223364	183496	111892	82596	251987	153841	54489.4	58473	47820.2	77502.2	71868.8	113803	121014	321924	125839	142079	122129	72974.4	77535.8	104914	133043	53673.9	56731.5
n2783	334.067	15.8047	C9H19O11P	sn-glycero-3-Phospho-1-inositol	7	Undefined	Undefined	335041	0.420871	1	0.453203	0.157458	1.05187	0.502565	0.178646	0.529162	0.445825	0.227089	0.58627	0.377788	0.146003	0.381982	121630	112619	126469	101828	75032.2	209353	270037	256445	280449	261018	102026	131172	164362	89087.5	92229.9	39109.7	48737.3	25870	39685.7	47718.2	231702	335041	264978	262461	249374	133989	160310
n2788	127.912	9.85053	HI	hydrogen iodide	5	Undefined	Undefined	156096	1.38399	1	0.749601	0.689724	0.865753	0.750007	0.725577	1.24742	1.04978	1.66682	1.21854	1.35749	1.25469	0.914675	102717	80301.4	126262	70705.6	69119.8	66726.4	65546.6	59893.9	55164.1	77168.7	48134.2	59101.1	52028.8	41022.6	42958.4	37761.7	37230.5	48290.2	52635.2	47897.8	52937.3	53939.9	56710.7	59089.3	58259.3	45719.5	50818.1
n2791	170.131	4.2819	C10H18O2	(E)-3,7-Dimethylocta-1,6-diene-3,8-diol	7	Undefined	Undefined	495794	1.04759	1	0.181	0.213794	0.308468	0.21833	0.178709	1.08545	0.287595	0.568243	0.391033	0.304186	0.583865	0.342084	364585	420396	315035	308252	289171	280165	455152	445236	198264	241511	34948.6	63108.1	91038.1	58052.5	46132.2	67550.7	92454.1	59176.4	65708.7	61526.9	69674.6	105414	129267	108094	87369.4	85958.3	81423.1
n2817	160.092	5.08258	C8H16OS	2-Methyl-4-propyl-1,3-oxathiane	7	Undefined	Undefined	544395	1.72346	1	0.329441	0.414769	0.580095	0.336067	0.407747	0.878099	0.385652	0.726961	0.509074	0.280214	0.447219	0.485046	544395	236490	494867	191203	211630	250828	403313	64248.6	162446	93124.2	63819.8	89220.1	41222.9	66325.3	60274.4	69247.8	97453.3	79172.9	108933	49160.6	84706.2	153019	65851.8	120185	141227	93797.1	61488
n2828	291.095	12.4081	C11H17NO8	2,7-Anhydro-alpha-N-acetylneuraminic acid	5	Undefined	Undefined	171662	1.54129	1	1.03742	0.742128	1.22242	1.06032	0.72963	0.868168	0.915585	1.3878	0.80075	0.848127	0.763051	1.10932	74450.4	37033.3	161874	57687.3	43921.1	46883.7	45186.8	45706.4	50835.9	54667	46509.9	59496.6	45717.8	51117.8	49541.2	40417.6	32244.5	31183.9	35615.8	41083	53411.3	86928.6	66554.6	49605.2	40890.1	49203.2	58405.6
n2867	117.936	28.0238	CrH2O4	chromate	7	Undefined	Undefined	313611	1.14951	1	0.795866	0.348401	0.946585	0.79449	0.365343	1.25828	0.564553	0.617549	1.13602	0.621488	0.515514	0.817817	308998	219136	186076	213055	148414	247922	171719	213868	153756	148508	165651	129467	183179	149936	116516	72881.5	69859.3	66224.7	56910.5	60148.4	251632	132743	213852	158870	128691	186003	159851
n2881	215.058	4.57024	C12H9NO3	Robustine	7	Undefined	Undefined	410627	0	0	0	0	0	0	0	0	7.83593	254.41	0	34.8607	124.409	11.7901	0	0	0	0	0	0	0	0	0	0	0	0	0	0	0	0	0	0	0	0	0	0	0	0	0	0	0
n2912	160.11	5.14245	C8H16O3	Ethyl (R)-3-hydroxyhexanoate	7	Undefined	Undefined	378482	1.35978	1	0.349951	0.222253	0.857685	0.321821	0.28078	1.13782	0.480018	0.437161	0.957822	0.66238	0.404808	0.444085	354393	317045	282725	332171	279784	263323	222731	169830	230781	265078	71125.7	78477.1	83149.8	70104.9	100196	37938.9	51513.1	59577.4	71915.7	35033.2	218607	164678	223282	207151	174114	62343.8	84091.7
n2944	174.016	18.4907	C6H6O6	trans-Aconitate	9	Undefined	Undefined	204331	0.944571	1	1.24252	0.906377	1.28761	1.15796	0.826731	0.848238	0.823532	1.1573	0.899284	0.676713	0.701485	1.00392	72310.4	68761.1	90765	49855.2	63474.9	59818.3	76453.9	75422.5	86772.9	66954.1	70551.3	95417.5	74897.1	112473	100704	70618.6	43345.4	89568.6	63715.9	63961.3	70970.8	204331	68442	63023.2	63755.3	81122.4	90842.4
n2946	117.936	20.5963	CrH2O4	chromate	7	Undefined	Undefined	319821	1.14412	1	0.862282	0.661529	0.921025	0.797132	0.675833	1.30979	0.89769	1.11866	1.3632	1.10528	1.03134	0.856796	150761	187793	169153	193484	176053	149500	150011	164254	143661	159316	104999	121565	142486	121234	170862	90709.9	111437	109285	96774.1	99016.3	157927	106717	160962	145827	134757	109459	123858
n2966	242.152	7.56693	C13H22O4	2-isocapryloyl-3R-hydroxymethyl-&gamma;-butyrolactone	7	Undefined	Undefined	267731	1.10899	1	0.709747	0.800559	1.11404	1.27005	0.723903	1.15473	0.997321	1.41429	1.37164	1.13117	0.820465	1.11142	156289	190074	116150	131870	88922.5	115221	159099	93096.6	103274	145462	98727.8	167703	32897.1	41169.7	96814.6	38271.7	63517.6	83663.3	162790	145024	206694	59634.7	181874	190571	47644.6	216541	141804
n2996	408.228	4.41429	C19H37O7P	Palmitoylglycerone phosphate	7	Undefined	Undefined	307216	0.986333	1	0.652384	0.43311	0.560952	0.757485	0.535698	0.695894	0.791065	1.14844	0.628711	1.18433	0.825749	0.690546	105241	123775	188455	200854	163985	208929	124697	123779	149002	186745	87330.8	102301	97974.1	114258	115576	62370.6	45457.5	61866.3	93380.2	80446.8	127772	58480.3	86916.7	85156.3	86594.9	112974	106084
n3007	189.1	8.87187	C8H15NO4	(2S)-2-{[1-(R)-Carboxyethyl]amino}pentanoate	7	Undefined	Undefined	181184	1.01006	1	1.12039	3.84212	0.935063	1.03195	3.34383	1.04433	0.940271	1.18495	1.02158	0.97145	2.27607	1.6492	31828.3	37906.6	30124.1	30355	30139.7	30546.9	35096.8	32081	31352.3	29679.5	39904	35098.5	32485.5	37981.5	32400.2	160344	181184	110656	97951.5	59826.4	32660.1	27303.2	32631.3	26592.7	29260	29362.1	35725.3
n3013	182.085	7.49864	C12H10N2	Harman	7	Undefined	Undefined	188256	2.80108	1	2.76148	7.45197	1.52203	2.44407	8.95357	2.64403	6.14146	9.24825	2.65506	6.29335	5.9973	5.2476	35066.4	33318.8	30951.8	22833	37810.6	6179.95	19714.4	8795.98	5886.39	16537.2	25501.5	28088.9	31925.3	31847.9	40355.5	93864.9	66637.8	102800	78965.5	83342.1	11710.3	35399.3	12634.9	13472	13712.5	25648.6	28127.1
n3028	132.079	5.15205	C6H12O3	Ethyl (R)-3-hydroxybutanoate	7	Undefined	Undefined	301636	0.890934	1	0.723084	0.460766	0.831251	0.735541	0.469888	1.01275	0.810221	0.455561	0.783391	0.660701	0.485713	0.612194	240849	164909	162098	180853	168879	243860	209824	228343	165394	182496	141369	120085	176817	160437	146008	110231	88035.2	103829	88562.3	83892.6	166495	166787	174393	135399	213045	156596	135555
n3049	212.009	15.1585	C5H9O7P	phosphinomethylisomalate	7	Undefined	Undefined	188660	1.35757	1	0.7112	1.28012	0.67015	0.566254	1.26644	0.965821	0.629168	0.475515	0.651414	0.574156	0.633455	0.853274	76394.4	151203	88925.4	162920	188660	81914.3	109075	81495.3	118121	101528	36550.9	68729.5	60829.9	92186.1	91708.9	107176	102137	145116	153852	121711	66996.5	68911.8	66549	62366.7	64978.8	48049.1	71513.6
n3094	335.133	14.6375	C12H21N3O8	N4-(Acetyl-beta-D-glucosaminyl)asparagine	7	Undefined	Undefined	136253	0.792421	1	1.42585	0.935855	1.33134	1.63401	0.851709	0.90839	1.37804	0.749069	0.945226	1.16904	0.718495	1.00742	49784.6	53813.5	55470.6	52618.7	55903.8	64862.4	75044.9	68889.5	73469	55422.5	64699.6	96591.5	98023	103819	118359	78622.1	33517.1	52656.7	76811.5	74419.9	64555.9	136253	89014.4	88165.8	71587.7	111406	113317
n3140	146.094	7.57403	C7H14O3	ethyl-(2R)-methyl-(3S)-hydroxybutanoate	7	Undefined	Undefined	144508	1.08169	1	0.701257	0.621381	0.806594	0.674086	0.559394	1.34925	0.812309	0.95138	1.13058	1.0019	0.778799	1.10604	56672.4	110222	46300.2	60541.1	66259.7	57175.9	56895.9	43022.6	37458.8	119764	51443.1	41573.5	38392.8	38488.7	50519.1	29369.8	42146.7	41520.7	43977.4	38296.4	76968.9	25007.6	57902	42359.4	51288.8	17128.8	65700.6
n3159	173.105	7.09462	C8H15NO3	Isovalerylalanine	5	Undefined	Undefined	118068	0.31599	1	1.28549	0.699051	0.786553	1.22094	0.736958	0.364874	0.51154	0.191946	0.467799	0.350104	0.516873	0.272871	14532.1	19760.1	6706.69	35958.4	23151.5	55130	63638.6	44572.1	118068	35401.6	88980.2	77916.2	97137.4	84421.2	58799.7	51408.7	57942.6	32019.8	44192.5	35902.8	51186.9	52107.4	28009.5	65956.4	51927.5	88751.5	67237
n3162	373.077	14.546	C11H20NO11P	N-acetylmuramate 6-phosphate	7	Undefined	Undefined	158799	1.35092	1	0.714206	0.275363	0.980063	0.707558	0.33821	0.524805	0.681809	0.541966	0.649632	0.554842	0.405354	0.688376	65204	84620.6	53828.2	158799	155949	81479.7	58969.2	56522	100215	86553.4	16707.5	56123.9	44381.9	83518.1	73337.5	30143.4	0	18582.2	30519.2	26422.9	77467.3	71315.6	77380	75687.7	74238.4	40168.4	63511
n502	144.053	14.0793	C5H8N2O3	N-Nitrosoproline	5	Undefined	Undefined	117690	0.364632	1	5.5243	7.00242	0.463634	4.8438	6.5636	0.0940745	1.46728	0	0.202072	0.676231	3.13602	3.19986	0	4340.25	0	19737.8	0	15506.2	11783.7	5976.19	27202.9	5564.77	43248.5	70156.7	70650.2	89524	91210.9	76342.3	117690	89005.4	93286.4	86072.8	6528.08	4048.41	0	13060.4	6978.61	54416.2	60638.5
n635	238.132	7.56922	C12H18N2O3	Secobarbital	5	Undefined	Undefined	3371155	1.24428	1	0.772082	0.70736	0.982072	0.843397	0.688804	1.25513	1.01129	1.25216	1.19467	1.21206	0.896506	0.975667	2.45607e+06	2.44005e+06	2.22619e+06	1.9919e+06	2.3897e+06	1.80278e+06	1.63937e+06	2.22063e+06	1.73888e+06	1.84381e+06	1.36327e+06	1.50336e+06	1.63436e+06	1.37142e+06	1.26586e+06	1.22948e+06	1.39156e+06	1.13773e+06	1.2571e+06	1.52402e+06	1.94319e+06	1.2575e+06	2.39955e+06	1.69966e+06	1.77981e+06	1.604e+06	1.45362e+06
n645	122.037	7.57092	C7H6O2	methyl-1,4-benzoquinone	5	Undefined	Undefined	1939274	1.2501	1	0.909841	0.732039	1.03772	0.763026	0.768687	1.24964	0.972756	1.24097	1.04315	1.18008	1.10275	1.34057	982885	933094	789710	815199	783948	626696	666632	766051	620800	763413	825079	447770	574729	625089	660455	451524	472001	469047	643860	484411	633754	876893	818542	628979	615317	511565	491175
n668	234.1	7.58149	C12H14N2O3	5-Methoxytryptophan	5	Undefined	Undefined	1032245	1.0808	1	1.29492	1.59455	1.65	1.40383	1.45994	0.899217	1.1951	1.89609	1.12763	1.0939	1.2707	1.47123	218749	268364	464091	326344	345859	231172	361675	337694	261165	310338	358009	385256	383331	452960	365471	606918	277114	579850	481313	449890	343760	1.03225e+06	442035	330154	330182	411812	468709
n669	102.043	7.57304	C3H6N2O2	3-Amino-2-oxazolidone	5	Undefined	Undefined	1022152	1.14962	1	0.81461	0.704492	0.846492	0.733948	0.654373	1.29716	1.00365	1.10768	1.12196	1.29738	0.774595	0.973121	827401	809770	575921	625090	712614	606807	553077	730963	581845	615972	541958	441458	556390	432334	543918	353382	473767	423594	502991	422205	649939	278259	650186	508283	527862	458097	438651
n676	160.074	7.56351	C7H12O4	(1S,3R,4S)-3,4-Dihydroxycyclohexane-1-carboxylate	5	Undefined	Undefined	787948	1.15013	1	0.883193	0.668823	1.00346	0.783368	0.663795	1.20087	0.953949	1.02762	1.15648	1.11814	0.774728	0.933319	586458	742285	489106	459402	503183	472643	489948	478940	364718	611242	431086	394221	430432	418302	461069	379727	295078	245640	343506	352923	517293	323818	609920	454647	520183	399600	338099
n679	375.179	7.57606	C19H25N3O5	4-[N-&gamma;-L-glutamyl-)-p-(&beta;-aminoethyl)phenoxy-methyl]-2-(aminomethyl)furan	5	Undefined	Undefined	659557	0.757184	1	0.903161	0.889334	1.35135	0.833565	0.659154	0.821348	0.499761	0.518389	0.708463	0.6711	0.44155	0.805271	160134	149286	253494	143838	104932	148430	288307	179696	333166	122379	229578	169725	210948	186954	170963	148415	93566.6	244352	253549	213464	177140	659557	216197	237262	158455	220713	114813
n682	254.058	7.60572	C15H10O4	Apigeninidin	5	Undefined	Undefined	644808	0.682168	1	0.759972	0.581996	1.1188	0.761721	0.626412	0.821656	0.742687	0.88726	0.823601	0.725155	0.596506	0.775056	207683	383999	282545	293090	320479	332374	644808	478566	299601	425631	238678	323714	336602	360102	398387	261316	180405	239879	293510	294211	565341	498323	533516	420974	421928	373707	317895
n683	144.079	7.57247	C7H12O3	ethyl-2-methylacetoacetate	5	Undefined	Undefined	641631	1.20012	1	0.715853	0.571586	1.01673	0.728954	0.650625	1.06593	0.883135	0.970201	1.12028	1.1389	0.731448	1.02981	459122	346618	312729	252853	239765	283669	211593	297400	233071	316705	188666	168950	214654	191580	197139	178132	150876	128569	140103	169638	296857	213712	331477	248889	273960	153856	140857
n757	246.05	12.5834	C6H15O8P	Glycerophosphoglycerol	7	Undefined	Undefined	32634619	1.43662	1	0.217566	0.0118327	0.653452	0.155292	0.00995213	1.17544	0.262576	0.128927	0.708661	0.256316	0.0524626	0.422373	2.34506e+07	1.9799e+07	3.26346e+07	1.52964e+07	1.63994e+07	1.37256e+07	1.94583e+07	1.43539e+07	1.43203e+07	1.30263e+07	1.97396e+06	3.39441e+06	3.52734e+06	3.61366e+06	3.7829e+06	148466	131214	168481	218731	219188	1.30491e+07	1.06448e+07	9.59787e+06	7.55633e+06	8.08527e+06	2.18679e+06	2.7785e+06
n80	206.167	4.23743	C14H22O	alpha-Irone	7	Undefined	Undefined	141984966	1.46576	1	0.262283	0.347794	0.552294	0.283142	0.362821	0.925602	0.266743	0.868661	0.454442	0.272064	0.610615	0.393356	1.41985e+08	6.01254e+07	1.0109e+08	5.98641e+07	5.70505e+07	7.84121e+07	1.05061e+08	2.16061e+07	4.5033e+07	3.65059e+07	1.63454e+07	1.94866e+07	1.28607e+07	1.54412e+07	1.10413e+07	1.62109e+07	1.71054e+07	2.0377e+07	3.44276e+07	1.15632e+07	3.07125e+07	4.21875e+07	1.80423e+07	3.32807e+07	3.40747e+07	1.63917e+07	2.48018e+07
n817	154.003	15.574	C3H7O5P	Hydroxyacetone phosphate	5	Undefined	Undefined	152801	1.22239	1	0.32621	0	0.730741	0.270601	0	1.48509	0.518039	0.137735	0.999562	0.482504	0.0597144	0.477024	103013	142245	114854	96099.3	134302	78011.5	111429	91456.2	89791.1	112391	21027.4	29585.6	33385	34561.8	39025.3	0	0	0	0	0	98056.3	49417.7	87543.3	50805.8	67182.3	25138.4	28309.9
p1021	189.075	10.1143	C6H11N3O4	N-Amidino-L-glutamate	5	Undefined	Undefined	581005	1.24721	1	1.1692	1.2613	1.16896	1.22331	1.27304	1.24682	1.28429	1.7931	1.2538	1.50206	1.4263	1.25339	221002	255970	383371	194164	301311	186938	165375	271249	182190	281326	183672	230165	308823	269429	278918	271756	219295	335681	276798	267600	196586	435104	255252	182974	200836	189599	285737
p1039	407.104	13.7783	C19H21NO7S	Erysothiopine	5	Undefined	Undefined	529491	0	0	40.2138	417.742	10.495	31.022	369.717	0	0	0	0	0	103.669	97.6208	0	0	0	0	0	0	0	0	0	0	0	28057	17024.4	98121.8	57865.9	396227	324991	529491	415970	422032	0	52475.2	0	0	0	17705.8	28633.3
p105	202.132	7.60665	C9H18N2O3	N-&alpha;-acetyl lysine methyl ester	5	Undefined	Undefined	4030576	1.50846	1	0.745925	0.926562	1.10848	0.841363	0.85109	1.21108	0.903342	1.49189	1.24992	1.1062	1.01233	1.19906	1.98439e+06	1.35665e+06	3.79909e+06	1.39208e+06	1.35731e+06	1.30929e+06	1.22714e+06	1.54396e+06	1.11435e+06	1.36128e+06	889800	974139	980198	1.05298e+06	993176	1.25286e+06	1.02709e+06	1.46212e+06	1.14802e+06	1.18446e+06	1.06914e+06	2.47267e+06	1.30203e+06	1.04612e+06	1.37726e+06	899834	1.40278e+06
p1056	190.095	22.617	C7H14N2O4	D,D-diaminopimelate	5	Undefined	Undefined	278188	0.880338	1	1.30319	1.35963	1.0794	1.32638	1.28973	0.634731	1.09135	0.873966	0.702821	0.788454	0.817888	1.05806	140714	131734	221462	177823	141406	174151	176219	177988	234130	161179	233533	199536	228247	268685	273718	261817	223849	277265	252252	240662	171816	218991	157387	210220	238591	240613	251388
p1066	613.564	3.88479	C37H75NO5	N-(2-hydroxynonadecanoyl)-phytosphingosine	5	Undefined	Undefined	35950582	0.929432	1	0.76017	0.484564	0.841353	0.764237	0.515144	1.32242	1.21052	0.905606	1.11762	1.2928	1.19538	0.577821	2.03585e+07	1.94395e+07	3.98191e+06	2.01753e+07	2.00149e+07	1.93437e+07	1.48078e+07	2.2891e+07	1.48909e+07	1.84122e+07	1.31879e+07	1.4415e+07	1.34046e+07	1.33101e+07	1.43604e+07	8.84338e+06	6.82589e+06	9.31754e+06	9.04756e+06	9.74387e+06	1.92831e+07	1.03482e+07	1.93785e+07	1.31394e+07	1.38632e+07	1.43948e+07	1.35177e+07
p116	198.1	7.62173	C9H14N2O3	Metharbital	5	Undefined	Undefined	2360579	1.35137	1	0.967867	1.048	1.10055	0.97984	1.03188	1.18835	1.16188	2.24196	1.3033	1.38447	1.44905	1.11861	756246	894174	2.27051e+06	848266	865456	548016	925875	869869	777426	1.04839e+06	616122	1.00879e+06	725885	937741	747057	927681	707620	1.05556e+06	834087	844743	599533	1.32502e+06	824311	784769	1.05521e+06	783691	774469
p1258	309.106	14.6071	C11H19NO9	&alpha;-N-acetylneuraminate	5	Undefined	Undefined	371024	1.15346	1	0.829161	0.746869	0.930741	0.77212	0.721969	1.11813	1.0338	1.03579	1.02378	1.11855	0.799193	0.879295	303537	297127	299140	267501	286669	251476	235010	245429	259855	268768	238353	216810	196842	182564	210620	171715	166113	189294	191440	222895	277859	187367	257652	231016	219339	172239	189384
p127	236.116	7.61543	C12H16N2O3	Carbetamide	5	Undefined	Undefined	1460333	1.31514	1	0.723782	0.73776	1.12473	0.696137	0.806088	1.12083	0.866137	1.76827	0.890769	1.23506	1.05227	1.04048	589208	321295	1.17907e+06	527139	621943	494290	456408	760935	276910	474042	407681	287041	323121	476733	287798	342939	201056	573772	347032	351996	341915	1.08009e+06	471263	260405	616078	377262	498224
[truncated: 172 more rows]
[truncated: 49 more columns]
